# Supplementary material for: Archaeal lineages related to eukaryotes encode functional diterpenoid cyclases
Source: Research Square preprint supplement (doi:10.21203/rs.3.rs-6009237/v1), 2025-02-27
Supplement: Supplementary file 1 [file 4274ad4c7619ff27733cb35e.docx]

**Supplementary Information Guide** for McShea & De Anda et al., Archaeal lineages related to eukaryotes encode functional diterpenoid cyclases.

Supplementary_table_1.xlsx:

**Supplementary Table 1.** Overview of the archaea database constructed in this study, organized into separate tabs by major taxonomic groups (e.g., Euryarchaeota, TACK, Asgard, and DPANN). Each tab contains the following information for each genome: assembly accession, GTDB‐Tk taxonomy, organism name, organism group, strain, BioSample, BioProject, assembly level, genome size (Mb), GC content, number of replicons, WGS accession, number of scaffolds, number of coding sequences (CDS), release date, and publicly available GenBank/RefSeq FTP links The last tab  summarizes the number of genomes in each major taxonomic group and their respective total of genomes in the database analyzed in this study.

Supplementary_table_2.xlsx:
**Supplementary Table 2.** Overview of the protein families (PFAM) involved in sterol biosynthesis that were screened in this study, along with their distribution across archaeal genomes (listed in Supplementary Table 1) and the eukaryotic database.  The first sheet provides the Pfam-to-KEGG ID mapping file and pathway definitions, while subsequent sheets show the occurrence of each Pfam across the eukaryotic and archaeal genomic catalogues. Each pathway (e.g., Pathway 1) is defined by a specific combination of Pfams; pathway completeness in a given genome is determined by how many of these Pfams are present in a given genome (See De Anda et al., 2017 for more details)
