# Supplementary material for: Archaeal lineages related to eukaryotes encode functional diterpenoid cyclases
Source: Research Square preprint supplement (doi:10.21203/rs.3.rs-6009237/v1), 2025-02-27
Supplement: Supplementary file 3 [file 70c171b1cf9f055330ba29c6.xlsx]

## Sheet: Caption
Supplementary Table 2. Overview of the protein families (PFAM) involved in sterol biosynthesis that were screened in this study, along with their distribution across archaeal genomes (listed in Supplementary Table 1) and the eukaryotic database. The first sheet provides the Pfam-to-KEGG ID mapping file and pathway definitions, while subsequent sheets show the occurrence of each Pfam across the eu…

## Sheet: Sterol Biosynthesis Pfams
Name	Pfam	KO	PATHWAY NUMBER	PATHWAY NAME	NOTES
Thiolase, C-terminal domain	PF02803	K00626	1	Mevalonate core (common in Eukaryotes and Archaea)
Thiolase, N-terminal domain	PF00108	K00626	1
Hydroxymethylglutaryl-coenzyme A synthase C terminal	PF08540	K01641	1
Hydroxymethylglutaryl-coenzyme A synthase N terminal	PF01154		1
FMN-dependent dehydrogenase	PF01070	K01823	1
Hydroxymethylglutaryl-coenzyme A reductase	PF00368	K00021	2	Mevalonate (Eukaryotic steps)
GHMP kinases C terminal	PF08544	K00869	2
GHMP kinase family	PF08544	K00869	2
GHMP kinases N terminal domain	PF00288		2
Phosphomevalonate kinase	PF04275	K00938, K13273	2		only eukaryotes
Mevalonate 5-diphosphate decarboxylase C-terminal domain	PF18376		2
Phosphomevalonate kinase	PF04275	K00938, K13273	3	Mev euk unique step
1-deoxy-D-xylulose-5-phosphate synthase	PF13292	K01662	4	Methylerythritol phosphate (MEP)
1-deoxy-D-xylulose 5-phosphate reductoisomerase C-terminal domain	PF08436	K00099	4
1-deoxy-D-xylulose 5-phosphate reductoisomerase	PF02670		4
DXP reductoisomerase C-terminal domain	PF13288		4
2-C-methyl-D-erythritol 4-phosphate cytidylyltransferase	PF01128	K00991	4
YgbB family	PF02542	K01770	4
GcpE protein	PF04551	K03526	4
LytB protein	PF02401	K03527	4
Polyprenyl synthetase	PF00348	K00787, K00795	5	Squalene synthesis
Squalene/phytoene synthase	PF00494	K00801	6	Squalene synthesis
Squalene epoxidase	PF08491	K00511	7	Squalene epoxidation
Fatty acid hydroxylase	PF04116	K23485	8	Alternate squalene epoxidation
Squalene-hopene cyclase C-terminal domain	PF13243	K01852, K06045, K18115, K15810	9	Cyclization
Squalene-hopene cyclase N-terminal domain	PF13249		9	Cyclization
Ergosterol biosynthesis ERG4/ERG24 family	PF01222	K00222	10	C-14 Demethylation	mostly in eukaryotes
Fatty acid hydroxylase	PF04116	K07750	10	C-4 Demethylation	eukatyotes and bacteria
Erg28 like protein	PF03694		10	C-4 Demethylation	only eukaryotes
ERG2 and Sigma1 receptor like protein	PF04622	K09829	11	Desaturation modification

## Sheet: Completeness
Genome name	Name	Group	GTDBTK-Taxonomy	Superphyla	cyc_1	cyc_2	cyc_3	cyc_4	cyc_5	cyc_6	cyc_7	cyc_8	cyc_9	cyc_10	cyc_11
GCA_023659895.1_ASM2365989v1_genomic	GCA_023659895.1	Candidatus Aenigmarchaeota	Aenigmatarchaeia	DPANN	20	50	0	0	100	0	0	0	0	0	0
GCA_016432325.1_ASM1643232v1_genomic	GCA_016432325.1	Candidatus Aenigmarchaeota	Aenigmatarchaeia	DPANN	60	50	0	12.5	100	0	0	0	0	0	0
GCA_016187365.1_ASM1618736v1_genomic	GCA_016187365.1	Candidatus Aenigmarchaeota	Aenigmatarchaeia	DPANN	40	66.7	0	12.5	0	0	0	0	0	0	0
GCA_011772995.1_ASM1177299v1_genomic	GCA_011772995.1	Candidatus Aenigmarchaeota	Aenigmatarchaeia	DPANN	60	0	0	0	100	0	0	0	0	0	0
GCA_002791855.1_ASM279185v1_genomic	GCA_002791855.1	Candidatus Aenigmarchaeota	Aenigmatarchaeia	DPANN	0	0	0	0	0	0	0	0	0	0	0
GCA_001873985.1_ASM187398v1_genomic	GCA_001873985.1	Candidatus Aenigmarchaeota	Aenigmatarchaeia	DPANN	0	0	0	0	0	0	0	0	0	0	0
GCA_011772645.1_ASM1177264v1_genomic	GCA_011772645.1	Candidatus Aenigmarchaeota	Aenigmatarchaeia	DPANN	60	0	0	0	100	0	0	0	0	0	0
GCA_018304565.1_ASM1830456v1_genomic	GCA_018304565.1	Candidatus Aenigmarchaeota	Aenigmatarchaeia	DPANN	40	50	0	25	100	0	0	0	0	0	0
GCA_020343735.1_ASM2034373v1_genomic	GCA_020343735.1	Candidatus Aenigmarchaeota	Aenigmatarchaeia	DPANN	40	50	0	12.5	100	0	0	0	0	0	0
GCA_018920285.1_ASM1892028v1_genomic	GCA_018920285.1	Candidatus Aenigmarchaeota	Aenigmatarchaeia	DPANN	20	33.3	0	0	0	0	0	0	0	0	0
GCA_017607945.1_ASM1760794v1_genomic	GCA_017607945.1	Candidatus Aenigmarchaeota	Aenigmatarchaeia	DPANN	80	66.7	0	12.5	100	0	0	0	0	0	0
GCA_016219485.1_ASM1621948v1_genomic	GCA_016219485.1	Candidatus Aenigmarchaeota	Aenigmatarchaeia	DPANN	60	50	0	25	100	0	0	0	0	0	0
GCA_013152905.1_ASM1315290v1_genomic	GCA_013152905.1	Candidatus Micrarchaeota	Aenigmatarchaeia	DPANN	20	33.3	0	0	100	0	0	0	0	0	0
GCA_023658855.1_ASM2365885v1_genomic	GCA_023658855.1	Candidatus Aenigmarchaeota	Aenigmatarchaeia	DPANN	0	16.7	0	0	0	0	0	0	0	0	0
GCA_023659975.1_ASM2365997v1_genomic	GCA_023659975.1	Candidatus Aenigmarchaeota	Aenigmatarchaeia	DPANN	60	66.7	0	0	100	0	0	0	0	0	0
GCA_018920345.1_ASM1892034v1_genomic	GCA_018920345.1	Candidatus Aenigmarchaeota	Aenigmatarchaeia	DPANN	20	0	0	12.5	0	0	0	0	0	0	0
GCA_002781865.1_ASM278186v1_genomic	GCA_002781865.1	Candidatus Aenigmarchaeota	Aenigmatarchaeia	DPANN	0	0	0	0	0	0	0	0	0	0	0
GCA_011773405.1_ASM1177340v1_genomic	GCA_011773405.1	Candidatus Aenigmarchaeota	Aenigmatarchaeia	DPANN	60	66.7	0	37.5	100	0	0	0	0	0	0
GCA_002781145.1_ASM278114v1_genomic	GCA_002781145.1	Candidatus Aenigmarchaeota	Aenigmatarchaeia	DPANN	0	0	0	0	0	0	0	0	0	0	0
GCA_023659955.1_ASM2365995v1_genomic	GCA_023659955.1	Candidatus Aenigmarchaeota	Aenigmatarchaeia	DPANN	80	16.7	0	0	0	0	0	0	0	0	0
GCA_023659935.1_ASM2365993v1_genomic	GCA_023659935.1	Candidatus Aenigmarchaeota	Aenigmatarchaeia	DPANN	60	66.7	0	0	100	0	0	0	0	0	0
GCA_023659905.1_ASM2365990v1_genomic	GCA_023659905.1	Candidatus Aenigmarchaeota	Aenigmatarchaeia	DPANN	20	50	0	0	0	0	0	0	0	0	0
GCA_002789635.1_ASM278963v1_genomic	GCA_002789635.1	Candidatus Aenigmarchaeota	Aenigmatarchaeia	DPANN	0	0	0	0	0	0	0	0	0	0	0
GCA_011773905.1_ASM1177390v1_genomic	GCA_011773905.1	Candidatus Aenigmarchaeota	Aenigmatarchaeia	DPANN	60	16.7	0	0	100	0	0	0	0	0	0
GCA_023256115.1_ASM2325611v1_genomic	GCA_023256115.1	Candidatus Aenigmarchaeota	Aenigmatarchaeia	DPANN	0	0	0	12.5	0	0	0	0	0	0	0
GCA_017610225.1_ASM1761022v1_genomic	GCA_017610225.1	Candidatus Aenigmarchaeota	Aenigmatarchaeia	DPANN	0	0	0	0	0	0	0	0	0	33.3	0
GCA_020343575.1_ASM2034357v1_genomic	GCA_020343575.1	Candidatus Aenigmarchaeota	Aenigmatarchaeia	DPANN	60	50	0	0	100	0	0	0	0	0	0
GCA_018920245.1_ASM1892024v1_genomic	GCA_018920245.1	Candidatus Aenigmarchaeota	Aenigmatarchaeia	DPANN	20	33.3	0	0	100	0	0	0	0	0	0
GCA_009993355.1_ASM999335v1_genomic	GCA_009993355.1	Candidatus Aenigmarchaeota	Aenigmatarchaeia	DPANN	0	0	0	0	0	0	0	0	0	0	0
GCA_020343635.1_ASM2034363v1_genomic	GCA_020343635.1	Candidatus Aenigmarchaeota	Aenigmatarchaeia	DPANN	80	50	0	0	100	0	0	0	0	0	0
GCA_009995015.1_ASM999501v1_genomic	GCA_009995015.1	Candidatus Aenigmarchaeota	Aenigmatarchaeia	DPANN	0	0	0	12.5	0	0	0	0	0	0	0
GCA_013151465.1_ASM1315146v1_genomic	GCA_013151465.1	Candidatus Micrarchaeota	Aenigmatarchaeia	DPANN	80	16.7	0	0	100	0	0	0	0	0	0
GCA_018304605.1_ASM1830460v1_genomic	GCA_018304605.1	Candidatus Aenigmarchaeota	Aenigmatarchaeia	DPANN	40	66.7	0	0	100	0	0	0	50	0	0
GCA_023658955.1_ASM2365895v1_genomic	GCA_023658955.1	Candidatus Aenigmarchaeota	Aenigmatarchaeia	DPANN	20	33.3	0	0	100	0	0	0	0	0	0
GCA_023658895.1_ASM2365889v1_genomic	GCA_023658895.1	Candidatus Aenigmarchaeota	Aenigmatarchaeia	DPANN	60	33.3	0	0	0	0	0	0	0	0	0
GCA_002782805.1_ASM278280v1_genomic	GCA_002782805.1	Candidatus Aenigmarchaeota	Aenigmatarchaeia	DPANN	0	0	0	0	0	0	0	0	0	0	0
GCA_018920315.1_ASM1892031v1_genomic	GCA_018920315.1	Candidatus Aenigmarchaeota	Aenigmatarchaeia	DPANN	80	66.7	0	0	100	0	0	0	0	0	0
GCA_016214795.1_ASM1621479v1_genomic	GCA_016214795.1	Candidatus Aenigmarchaeota	Aenigmatarchaeia	DPANN	40	50	0	12.5	100	0	0	0	0	0	0
GCA_018920255.1_ASM1892025v1_genomic	GCA_018920255.1	Candidatus Aenigmarchaeota	Aenigmatarchaeia	DPANN	60	33.3	0	0	100	0	0	0	0	0	0
GCA_016176655.1_ASM1617665v1_genomic	GCA_016176655.1	Candidatus Aenigmarchaeota	Aenigmatarchaeia	DPANN	20	0	0	0	0	0	0	0	0	0	0
GCA_011772535.1_ASM1177253v1_genomic	GCA_011772535.1	Candidatus Aenigmarchaeota	Aenigmatarchaeia	DPANN	60	50	0	12.5	100	100	0	0	0	0	0
GCA_016219465.1_ASM1621946v1_genomic	GCA_016219465.1	Candidatus Aenigmarchaeota	Aenigmatarchaeia	DPANN	40	66.7	0	12.5	100	0	0	0	0	0	0
GCA_016181005.1_ASM1618100v1_genomic	GCA_016181005.1	Candidatus Aenigmarchaeota	Aenigmatarchaeia	DPANN	60	0	0	12.5	0	0	0	0	0	0	0
GCA_002784265.1_ASM278426v1_genomic	GCA_002784265.1	Candidatus Aenigmarchaeota	Aenigmatarchaeia	DPANN	0	0	0	0	0	0	0	0	0	0	0
GCA_017609445.1_ASM1760944v1_genomic	GCA_017609445.1	Candidatus Aenigmarchaeota	Aenigmatarchaeia	DPANN	0	33.3	0	0	100	0	0	0	0	0	0
GCA_017609145.1_ASM1760914v1_genomic	GCA_017609145.1	Candidatus Aenigmarchaeota	Aenigmatarchaeia	DPANN	80	66.7	0	0	100	0	0	0	0	0	0
GCA_011772255.1_ASM1177225v1_genomic	GCA_011772255.1	Candidatus Aenigmarchaeota	Aenigmatarchaeia	DPANN	60	0	0	0	100	0	0	0	0	0	0
GCA_001786585.1_ASM178658v1_genomic	GCA_001786585.1	Candidatus Micrarchaeota	Aenigmatarchaeia	DPANN	20	0	0	12.5	100	0	0	0	0	0	0
GCA_013331845.1_ASM1333184v1_genomic	GCA_013331845.1	Candidatus Aenigmarchaeota	Aenigmatarchaeia	DPANN	20	66.7	0	12.5	100	0	0	0	0	0	0
GCA_002255055.1_ASM225505v1_genomic	GCA_002255055.1	Candidatus Aenigmarchaeota	Aenigmatarchaeia	DPANN	80	50	0	0	100	0	0	0	50	0	0
GCA_021731385.1_ASM2173138v1_genomic.fna.faa	GCA_021731385.1	unclassified Euryarchaeota	Altiarchaeia	Eukyarchaea	60	50	0	0	100	0	100	0	0	0	0
GCA_002785505.1_ASM278550v1_genomic	GCA_002785505.1	Candidatus Altiarchaeota	Altiarchaeia	DPANN	60	66.7	0	12.5	100	0	0	0	0	0	0
GCA_009992655.1_ASM999265v1_genomic	GCA_009992655.1	Candidatus Altiarchaeota	Altiarchaeia	DPANN	60	66.7	0	12.5	100	0	0	0	0	0	0
GCA_002254945.1_ASM225494v1_genomic	GCA_002254945.1	Candidatus Altiarchaeota	Altiarchaeia	DPANN	60	50	0	0	100	0	0	0	0	0	0
GCA_009995055.1_ASM999505v1_genomic	GCA_009995055.1	Candidatus Altiarchaeota	Altiarchaeia	DPANN	60	66.7	0	12.5	100	0	0	0	0	0	0
GCA_002762655.1_ASM276265v1_genomic	GCA_002762655.1	Candidatus Altiarchaeota	Altiarchaeia	DPANN	60	50	0	0	100	0	0	0	0	0	0
GCA_002083985.1_ASM208398v1_genomic	GCA_002083985.1	Candidatus Altiarchaeota	Altiarchaeia	DPANN	60	66.7	0	12.5	0	0	0	0	0	0	0
GCA_023252215.1_ASM2325221v1_genomic	GCA_023252215.1	Candidatus Altiarchaeota	Altiarchaeia	DPANN	80	50	0	0	100	0	0	0	0	0	0
GCA_020718025.1_ASM2071802v1_genomic	GCA_020718025.1	Candidatus Altiarchaeota	Altiarchaeia	DPANN	60	50	0	12.5	100	0	0	0	0	0	0
GCA_001723835.1_ASM172383v1_genomic	GCA_001723835.1	Candidatus Altiarchaeota	Altiarchaeia	DPANN	80	50	0	25	100	0	0	0	100	0	0
GCA_002783845.1_ASM278384v1_genomic	GCA_002783845.1	Candidatus Altiarchaeota	Altiarchaeia	DPANN	40	50	0	12.5	100	0	0	0	0	0	0
GCA_009995255.1_ASM999525v1_genomic	GCA_009995255.1	Candidatus Altiarchaeota	Altiarchaeia	DPANN	60	66.7	0	12.5	100	0	0	0	0	0	0
GCA_002254565.1_ASM225456v1_genomic	GCA_002254565.1	Candidatus Altiarchaeota	Altiarchaeia	DPANN	60	50	0	0	100	0	0	0	0	0	0
GCA_018260675.1_ASM1826067v1_genomic	GCA_018260675.1	Candidatus Altiarchaeota	Altiarchaeia	DPANN	60	66.7	0	12.5	100	0	0	0	0	0	0
GCA_020723115.1_ASM2072311v1_genomic	GCA_020723115.1	Candidatus Altiarchaeota	Altiarchaeia	DPANN	60	66.7	0	12.5	100	0	0	0	0	0	0
GCA_002841105.1_ASM284110v1_genomic	GCA_002841105.1	Candidatus Altiarchaeota	Altiarchaeia	DPANN	40	66.7	0	12.5	100	0	0	0	0	0	0
GCA_001873845.1_ASM187384v1_genomic	GCA_001873845.1	Candidatus Altiarchaeota	Altiarchaeia	DPANN	60	66.7	0	12.5	100	0	0	0	0	0	0
GCA_002841095.1_ASM284109v1_genomic	GCA_002841095.1	Candidatus Altiarchaeota	Altiarchaeia	DPANN	20	50	0	0	0	0	0	0	50	0	0
GCA_001742785.1_ASM174278v1_genomic	GCA_001742785.1	Candidatus Altiarchaeota	Altiarchaeia	DPANN	60	50	0	0	100	0	0	0	0	0	0
GCA_018260655.1_ASM1826065v1_genomic	GCA_018260655.1	Candidatus Altiarchaeota	Altiarchaeia	DPANN	60	66.7	0	12.5	100	0	0	0	50	0	0
GCA_018260715.1_ASM1826071v1_genomic	GCA_018260715.1	Candidatus Altiarchaeota	Altiarchaeia	DPANN	60	66.7	0	12.5	100	0	0	0	0	0	0
GCA_018260615.1_ASM1826061v1_genomic	GCA_018260615.1	Candidatus Altiarchaeota	Altiarchaeia	DPANN	60	66.7	0	12.5	100	0	0	0	0	0	0
GCA_018260755.1_ASM1826075v1_genomic	GCA_018260755.1	Candidatus Altiarchaeota	Altiarchaeia	DPANN	60	66.7	0	12.5	100	0	0	0	0	0	0
GCA_009992525.1_ASM999252v1_genomic	GCA_009992525.1	Candidatus Altiarchaeota	Altiarchaeia	DPANN	60	66.7	0	12.5	100	0	0	0	0	0	0
GCA_000734035.1_ASM73403v1_genomic.fna.faa	GCA_000734035.1	Archaeoglobi	Archaeoglobi	Eukyarchaea	80	50	0	12.5	100	0	0	0	100	0	0
GCA_000008665.1_ASM866v1_genomic.fna.faa	GCA_000008665.1	Archaeoglobi	Archaeoglobi	Eukyarchaea	60	50	0	12.5	100	0	0	0	100	0	0
GCA_013151125.1_ASM1315112v1_genomic.fna.faa	GCA_013151125.1	Archaeoglobi	Archaeoglobi	Eukyarchaea	60	50	0	12.5	100	0	0	0	0	0	0
GCA_000385565.1_ASM38556v1_genomic.fna.faa	GCA_000385565.1	Archaeoglobi	Archaeoglobi	Eukyarchaea	60	50	0	12.5	100	0	0	0	100	0	0
GCA_002494665.1_ASM249466v1_genomic.fna.faa	GCA_002494665.1	Archaeoglobi	Archaeoglobi	Eukyarchaea	80	50	0	25	100	0	0	0	100	0	0
GCA_000194625.1_ASM19462v1_genomic.fna.faa	GCA_000194625.1	Archaeoglobi	Archaeoglobi	Eukyarchaea	60	50	0	12.5	100	0	0	0	0	0	0
GCA_000025505.1_ASM2550v1_genomic.fna.faa	GCA_000025505.1	Archaeoglobi	Archaeoglobi	Eukyarchaea	60	50	0	25	100	0	0	0	100	0	0
GCA_000025285.1_ASM2528v1_genomic.fna.faa	GCA_000025285.1	Archaeoglobi	Archaeoglobi	Eukyarchaea	80	50	0	0	100	0	0	0	100	0	0
GCA_002507275.1_ASM250727v1_genomic.fna.faa	GCA_002507275.1	Archaeoglobi	Archaeoglobi	Eukyarchaea	80	50	0	12.5	100	0	0	0	100	0	0
GCA_014361185.1_ASM1436118v1_genomic.fna.faa	GCA_014361185.1	Archaeoglobi	Archaeoglobi	Eukyarchaea	60	50	0	12.5	100	0	0	0	100	0	0
GCA_002494625.1_ASM249462v1_genomic.fna.faa	GCA_002494625.1	Archaeoglobi	Archaeoglobi	Eukyarchaea	60	50	0	12.5	100	0	0	0	0	0	0
GCA_003935005.1_ASM393500v1_genomic.fna.faa	GCA_003935005.1	Archaeoglobi	Archaeoglobi	Eukyarchaea	60	50	0	12.5	100	0	0	0	0	0	0
GCA_001006045.1_ASM100604v1_genomic.fna.faa	GCA_001006045.1	Archaeoglobi	Archaeoglobi	Eukyarchaea	80	50	0	0	100	0	0	0	0	0	0
GCA_002507545.1_ASM250754v1_genomic.fna.faa	GCA_002507545.1	Archaeoglobi	Archaeoglobi	Eukyarchaea	80	50	0	25	100	0	0	0	100	0	0
GCA_011772235.1_ASM1177223v1_genomic	GCA_011772235.1	Candidatus Bathyarchaeota	Bathyarchaeia	TACK	60	50	0	0	100	0	0	100	100	33.3	0
GCA_018396875.1_ASM1839687v1_genomic	GCA_018396875.1	Candidatus Bathyarchaeota	Bathyarchaeia	TACK	60	50	0	12.5	100	0	0	0	0	33.3	0
GCA_003601835.1_ASM360183v1_genomic	GCA_003601835.1	Candidatus Bathyarchaeota	Bathyarchaeia	TACK	60	50	0	12.5	100	0	0	0	0	0	0
GCA_005881655.1_ASM588165v1_genomic	GCA_005881655.1	Candidatus Bathyarchaeota	Bathyarchaeia	TACK	100	66.7	0	25	100	0	100	0	50	0	0
GCA_011776045.1_ASM1177604v1_genomic	GCA_011776045.1	Candidatus Bathyarchaeota	Bathyarchaeia	TACK	60	50	0	0	100	0	0	100	0	66.7	0
GCA_020350385.1_ASM2035038v1_genomic	GCA_020350385.1	Candidatus Bathyarchaeota	Bathyarchaeia	TACK	60	33.3	0	12.5	100	0	0	0	0	33.3	0
GCA_007050895.1_ASM705089v1_genomic	GCA_007050895.1	Candidatus Bathyarchaeota	Bathyarchaeia	TACK	60	50	0	12.5	100	0	0	0	0	0	0
GCA_003601665.1_ASM360166v1_genomic	GCA_003601665.1	Candidatus Bathyarchaeota	Bathyarchaeia	TACK	60	33.3	0	0	100	0	0	0	0	0	0
GCA_007050885.1_ASM705088v1_genomic	GCA_007050885.1	Candidatus Bathyarchaeota	Bathyarchaeia	TACK	80	50	0	12.5	100	100	0	0	0	0	0
GCA_023249995.1_ASM2324999v1_genomic	GCA_023249995.1	Candidatus Bathyarchaeota	Bathyarchaeia	TACK	40	66.7	0	0	100	0	0	0	0	0	0
GCA_018396725.1_ASM1839672v1_genomic	GCA_018396725.1	Candidatus Bathyarchaeota	Bathyarchaeia	TACK	60	50	0	12.5	100	0	0	0	100	0	0
GCA_020356305.1_ASM2035630v1_genomic	GCA_020356305.1	Candidatus Bathyarchaeota	Bathyarchaeia	TACK	40	33.3	0	0	100	0	0	0	50	0	0
GCA_018396955.1_ASM1839695v1_genomic	GCA_018396955.1	Candidatus Bathyarchaeota	Bathyarchaeia	TACK	60	50	0	25	100	0	0	0	0	0	0
GCA_005884235.1_ASM588423v1_genomic	GCA_005884235.1	Candidatus Bathyarchaeota	Bathyarchaeia	TACK	100	33.3	0	25	100	0	100	0	50	0	0
GCA_023247835.1_ASM2324783v1_genomic	GCA_023247835.1	Candidatus Bathyarchaeota	Bathyarchaeia	TACK	60	50	0	0	100	0	100	0	0	0	0
GCA_018396415.1_ASM1839641v1_genomic	GCA_018396415.1	Candidatus Bathyarchaeota	Bathyarchaeia	TACK	80	66.7	0	12.5	100	0	0	0	0	0	0
GCA_017885285.1_ASM1788528v1_genomic	GCA_017885285.1	Candidatus Bathyarchaeota	Bathyarchaeia	TACK	0	33.3	0	0	0	0	0	0	0	0	0
GCA_014381835.1_ASM1438183v1_genomic	GCA_014381835.1	Candidatus Bathyarchaeota	Bathyarchaeia	TACK	80	50	0	12.5	100	0	0	0	50	0	0
GCA_002490245.1_ASM249024v1_genomic	GCA_002490245.1	Candidatus Bathyarchaeota	Bathyarchaeia	TACK	40	50	0	0	100	0	0	0	0	0	0
GCA_018396825.1_ASM1839682v1_genomic	GCA_018396825.1	Candidatus Bathyarchaeota	Bathyarchaeia	TACK	60	50	0	25	100	0	0	0	0	0	0
GCA_023488835.1_ASM2348883v1_genomic	GCA_023488835.1	Candidatus Bathyarchaeota	Bathyarchaeia	TACK	60	33.3	0	12.5	100	0	0	0	0	33.3	0
GCA_018396495.1_ASM1839649v1_genomic	GCA_018396495.1	Candidatus Bathyarchaeota	Bathyarchaeia	TACK	80	50	0	0	100	0	0	0	0	0	0
GCA_003141295.1_20120800_E3X_genomic	GCA_003141295.1	Candidatus Bathyarchaeota	Bathyarchaeia	TACK	60	50	0	12.5	100	0	0	0	0	0	0
GCA_003601875.1_ASM360187v1_genomic	GCA_003601875.1	Candidatus Bathyarchaeota	Bathyarchaeia	TACK	60	50	0	0	100	0	0	0	0	0	0
GCA_018396935.1_ASM1839693v1_genomic	GCA_018396935.1	Candidatus Bathyarchaeota	Bathyarchaeia	TACK	60	50	0	12.5	100	0	0	0	0	0	0
GCA_018396565.1_ASM1839656v1_genomic	GCA_018396565.1	Candidatus Bathyarchaeota	Bathyarchaeia	TACK	80	50	0	25	100	0	0	0	100	33.3	0
GCA_011774745.1_ASM1177474v1_genomic	GCA_011774745.1	Candidatus Bathyarchaeota	Bathyarchaeia	TACK	60	50	0	12.5	100	0	0	0	0	33.3	0
GCA_001593855.1_ASM159385v1_genomic	GCA_001593855.1	Candidatus Bathyarchaeota	Bathyarchaeia	TACK	40	50	0	0	100	0	0	0	0	33.3	0
GCA_007049975.1_ASM704997v1_genomic	GCA_007049975.1	Candidatus Bathyarchaeota	Bathyarchaeia	TACK	60	16.7	0	12.5	100	0	0	0	50	0	0
GCA_001593865.1_ASM159386v1_genomic	GCA_001593865.1	Candidatus Bathyarchaeota	Bathyarchaeia	TACK	80	50	0	0	100	0	0	0	0	0	0
GCA_011775725.1_ASM1177572v1_genomic	GCA_011775725.1	Candidatus Bathyarchaeota	Bathyarchaeia	TACK	40	16.7	0	0	0	0	0	0	0	0	0
GCA_003601595.1_ASM360159v1_genomic	GCA_003601595.1	Candidatus Bathyarchaeota	Bathyarchaeia	TACK	20	50	0	12.5	100	0	0	0	0	0	0
GCA_005883735.1_ASM588373v1_genomic	GCA_005883735.1	Candidatus Bathyarchaeota	Bathyarchaeia	TACK	100	66.7	0	25	100	0	0	0	0	0	0
GCA_005888695.1_ASM588869v1_genomic	GCA_005888695.1	Candidatus Bathyarchaeota	Bathyarchaeia	TACK	80	50	0	12.5	100	0	100	0	0	0	0
GCA_017886115.1_ASM1788611v1_genomic	GCA_017886115.1	Candidatus Bathyarchaeota	Bathyarchaeia	TACK	40	33.3	0	0	100	0	0	0	50	0	0
GCA_005882885.1_ASM588288v1_genomic	GCA_005882885.1	Candidatus Bathyarchaeota	Bathyarchaeia	TACK	100	50	0	0	100	0	100	0	100	0	0
GCA_018396595.1_ASM1839659v1_genomic	GCA_018396595.1	Candidatus Bathyarchaeota	Bathyarchaeia	TACK	60	50	0	0	100	0	0	0	0	0	0
GCA_005884215.1_ASM588421v1_genomic	GCA_005884215.1	Candidatus Bathyarchaeota	Bathyarchaeia	TACK	100	66.7	0	25	100	0	100	0	50	0	0
GCA_011776185.1_ASM1177618v1_genomic	GCA_011776185.1	Candidatus Bathyarchaeota	Bathyarchaeia	TACK	40	0	0	12.5	0	0	0	0	0	0	0
GCA_001920575.1_ASM192057v1_genomic	GCA_001920575.1	Crenarchaeota	Bathyarchaeia	TACK	80	66.7	0	12.5	100	0	100	0	0	0	0
GCA_002254475.1_ASM225447v1_genomic	GCA_002254475.1	Candidatus Bathyarchaeota	Bathyarchaeia	TACK	80	50	0	12.5	100	0	0	0	0	0	0
GCA_005888735.1_ASM588873v1_genomic	GCA_005888735.1	Candidatus Bathyarchaeota	Bathyarchaeia	TACK	80	66.7	0	12.5	100	0	100	0	50	0	0
GCA_020352645.1_ASM2035264v1_genomic	GCA_020352645.1	Candidatus Bathyarchaeota	Bathyarchaeia	TACK	60	33.3	0	0	100	0	0	100	100	66.7	0
GCA_002509245.1_ASM250924v1_genomic	GCA_002509245.1	Candidatus Bathyarchaeota	Bathyarchaeia	TACK	60	50	0	0	100	0	0	0	0	0	0
GCA_001593925.1_ASM159392v1_genomic	GCA_001593925.1	Candidatus Bathyarchaeota	Bathyarchaeia	TACK	80	50	0	12.5	100	0	0	0	0	0	0
GCA_003601715.1_ASM360171v1_genomic	GCA_003601715.1	Candidatus Bathyarchaeota	Bathyarchaeia	TACK	100	50	0	25	100	0	0	0	0	0	0
GCA_018397055.1_ASM1839705v1_genomic	GCA_018397055.1	Candidatus Bathyarchaeota	Bathyarchaeia	TACK	100	50	0	12.5	0	0	0	0	0	0	0
GCA_005888675.1_ASM588867v1_genomic	GCA_005888675.1	Candidatus Bathyarchaeota	Bathyarchaeia	TACK	80	50	0	25	100	0	100	0	0	0	0
GCA_001918765.1_ASM191876v1_genomic	GCA_001918765.1	Crenarchaeota	Bathyarchaeia	TACK	80	66.7	0	12.5	100	0	0	0	50	0	0
GCA_005883755.1_ASM588375v1_genomic	GCA_005883755.1	Candidatus Bathyarchaeota	Bathyarchaeia	TACK	100	66.7	0	12.5	100	0	0	0	50	0	0
GCA_020344435.1_ASM2034443v1_genomic	GCA_020344435.1	Candidatus Bathyarchaeota	Bathyarchaeia	TACK	60	50	0	0	100	0	0	0	0	0	0
GCA_005884195.1_ASM588419v1_genomic	GCA_005884195.1	Candidatus Bathyarchaeota	Bathyarchaeia	TACK	100	66.7	0	12.5	100	0	100	0	100	0	0
GCA_001399805.1_ASM139980v1_genomic	GCA_001399805.1	Candidatus Bathyarchaeota	Bathyarchaeia	TACK	60	50	0	0	100	0	0	0	50	0	0
GCA_017884795.1_ASM1788479v1_genomic	GCA_017884795.1	Candidatus Bathyarchaeota	Bathyarchaeia	TACK	0	0	0	0	0	0	0	0	0	0	0
GCA_001273415.1_ASM127341v1_genomic	GCA_001273415.1	Candidatus Bathyarchaeota	Bathyarchaeia	TACK	60	50	0	25	0	0	0	0	0	0	0
GCA_023488905.1_ASM2348890v1_genomic	GCA_023488905.1	Candidatus Bathyarchaeota	Bathyarchaeia	TACK	60	50	0	0	100	0	0	0	0	0	0
GCA_018648905.1_ASM1864890v1_genomic	GCA_018648905.1	Candidatus Bathyarchaeota	Bathyarchaeia	TACK	60	50	0	12.5	100	0	0	0	50	0	0
GCA_003601635.1_ASM360163v1_genomic	GCA_003601635.1	Candidatus Bathyarchaeota	Bathyarchaeia	TACK	0	0	0	0	0	0	0	0	0	0	0
GCA_001918735.1_ASM191873v1_genomic	GCA_001918735.1	Crenarchaeota	Bathyarchaeia	TACK	60	50	0	12.5	100	0	100	0	50	0	0
GCA_005888755.1_ASM588875v1_genomic	GCA_005888755.1	Candidatus Bathyarchaeota	Bathyarchaeia	TACK	100	66.7	0	25	100	0	100	0	50	0	0
GCA_011774665.1_ASM1177466v1_genomic	GCA_011774665.1	Candidatus Bathyarchaeota	Bathyarchaeia	TACK	40	0	0	0	0	0	0	0	0	0	0
GCA_018396695.1_ASM1839669v1_genomic	GCA_018396695.1	Candidatus Bathyarchaeota	Bathyarchaeia	TACK	60	50	0	25	100	0	0	0	50	33.3	0
GCA_018396775.1_ASM1839677v1_genomic	GCA_018396775.1	Candidatus Bathyarchaeota	Bathyarchaeia	TACK	80	50	0	25	100	0	0	0	0	0	0
GCA_002507245.1_ASM250724v1_genomic	GCA_002507245.1	Candidatus Bathyarchaeota	Bathyarchaeia	TACK	60	66.7	0	12.5	100	0	0	0	100	0	0
GCA_018396405.1_ASM1839640v1_genomic	GCA_018396405.1	Candidatus Bathyarchaeota	Bathyarchaeia	TACK	60	33.3	0	25	100	0	0	0	0	0	0
GCA_001273375.1_ASM127337v1_genomic	GCA_001273375.1	Candidatus Bathyarchaeota	Bathyarchaeia	TACK	80	33.3	0	25	0	0	0	0	0	0	0
GCA_018397065.1_ASM1839706v1_genomic	GCA_018397065.1	Candidatus Bathyarchaeota	Bathyarchaeia	TACK	60	50	0	12.5	0	0	0	0	0	0	0
GCA_001775995.1_ASM177599v1_genomic	GCA_001775995.1	Candidatus Bathyarchaeota	Bathyarchaeia	TACK	20	50	0	25	100	0	0	0	100	0	0
GCA_020344315.1_ASM2034431v1_genomic	GCA_020344315.1	Candidatus Bathyarchaeota	Bathyarchaeia	TACK	60	50	0	0	100	0	0	0	0	33.3	0
GCA_001918715.1_ASM191871v1_genomic	GCA_001918715.1	Crenarchaeota	Bathyarchaeia	TACK	80	66.7	0	0	100	0	100	0	50	0	0
GCA_011776745.1_ASM1177674v1_genomic	GCA_011776745.1	Candidatus Bathyarchaeota	Bathyarchaeia	TACK	20	0	0	0	0	0	0	0	0	0	0
GCA_005883695.1_ASM588369v1_genomic	GCA_005883695.1	Candidatus Bathyarchaeota	Bathyarchaeia	TACK	80	66.7	0	12.5	100	0	0	0	0	0	0
GCA_003601885.1_ASM360188v1_genomic	GCA_003601885.1	Candidatus Bathyarchaeota	Bathyarchaeia	TACK	60	0	0	0	100	0	0	0	0	0	0
GCA_003164295.1_20120700_S1D_genomic	GCA_003164295.1	Candidatus Bathyarchaeota	Bathyarchaeia	TACK	60	50	0	12.5	100	0	0	0	0	0	0
GCA_005882905.1_ASM588290v1_genomic	GCA_005882905.1	Candidatus Bathyarchaeota	Bathyarchaeia	TACK	100	50	0	25	100	0	100	0	50	0	0
GCA_017884485.1_ASM1788448v1_genomic	GCA_017884485.1	Candidatus Bathyarchaeota	Bathyarchaeia	TACK	20	0	0	0	100	0	0	0	0	0	0
GCA_018396615.1_ASM1839661v1_genomic	GCA_018396615.1	Candidatus Bathyarchaeota	Bathyarchaeia	TACK	60	50	0	25	100	0	0	0	50	0	0
GCA_011775735.1_ASM1177573v1_genomic	GCA_011775735.1	Candidatus Bathyarchaeota	Bathyarchaeia	TACK	60	50	0	0	100	0	0	100	100	33.3	0
GCA_003601725.1_ASM360172v1_genomic	GCA_003601725.1	Candidatus Bathyarchaeota	Bathyarchaeia	TACK	20	50	0	12.5	100	0	0	0	0	0	0
GCA_018397005.1_ASM1839700v1_genomic	GCA_018397005.1	Candidatus Bathyarchaeota	Bathyarchaeia	TACK	60	50	0	25	100	0	0	0	0	0	0
GCA_007049995.1_ASM704999v1_genomic	GCA_007049995.1	Candidatus Bathyarchaeota	Bathyarchaeia	TACK	60	50	0	12.5	100	0	0	0	50	0	0
GCA_005888625.1_ASM588862v1_genomic	GCA_005888625.1	Candidatus Bathyarchaeota	Bathyarchaeia	TACK	80	66.7	0	25	100	0	100	0	50	0	0
GCA_003250545.1_ASM325054v1_genomic	GCA_003250545.1	Candidatus Bathyarchaeota	Bathyarchaeia	TACK	20	50	0	12.5	0	0	0	0	0	0	0
GCA_007049895.1_ASM704989v1_genomic	GCA_007049895.1	Candidatus Bathyarchaeota	Bathyarchaeia	TACK	60	0	0	12.5	0	0	0	0	0	0	0
GCA_007050015.1_ASM705001v1_genomic	GCA_007050015.1	Candidatus Bathyarchaeota	Bathyarchaeia	TACK	20	16.7	0	0	0	0	0	0	0	0	0
GCA_016649625.1_ASM1664962v1_genomic	GCA_016649625.1	Candidatus Bathyarchaeota	Bathyarchaeia	TACK	60	33.3	0	12.5	100	0	0	0	0	0	0
GCA_003601845.1_ASM360184v1_genomic	GCA_003601845.1	Candidatus Bathyarchaeota	Bathyarchaeia	TACK	40	50	0	12.5	0	0	0	0	0	0	0
GCA_017885625.1_ASM1788562v1_genomic	GCA_017885625.1	Candidatus Bathyarchaeota	Bathyarchaeia	TACK	20	16.7	0	0	100	0	0	0	0	0	0
GCA_020348865.1_ASM2034886v1_genomic	GCA_020348865.1	Candidatus Bathyarchaeota	Bathyarchaeia	TACK	60	66.7	0	0	100	0	0	0	100	33.3	0
GCA_023256135.1_ASM2325613v1_genomic	GCA_023256135.1	Candidatus Bathyarchaeota	Bathyarchaeia	TACK	40	33.3	0	25	0	0	0	0	100	0	0
GCA_020351305.1_ASM2035130v1_genomic	GCA_020351305.1	Candidatus Bathyarchaeota	Bathyarchaeia	TACK	60	50	0	0	100	0	0	100	100	66.7	0
GCA_020344715.1_ASM2034471v1_genomic	GCA_020344715.1	Candidatus Bathyarchaeota	Bathyarchaeia	TACK	60	50	0	0	100	0	0	100	100	66.7	0
GCA_001399795.1_ASM139979v1_genomic	GCA_001399795.1	Candidatus Bathyarchaeota	Bathyarchaeia	TACK	60	50	0	0	100	0	0	0	0	0	0
GCA_017884385.1_ASM1788438v1_genomic	GCA_017884385.1	Candidatus Bathyarchaeota	Bathyarchaeia	TACK	20	0	0	12.5	100	0	0	0	0	0	0
GCA_003604315.1_ASM360431v1_genomic	GCA_003604315.1	Candidatus Bathyarchaeota	Bathyarchaeia	TACK	100	50	0	12.5	100	0	0	0	0	0	0
GCA_003601775.1_ASM360177v1_genomic	GCA_003601775.1	Candidatus Bathyarchaeota	Bathyarchaeia	TACK	80	50	0	0	100	0	0	0	50	0	0
GCA_018396655.1_ASM1839665v1_genomic	GCA_018396655.1	Candidatus Bathyarchaeota	Bathyarchaeia	TACK	60	50	0	12.5	100	0	0	0	0	33.3	0
GCA_007050865.1_ASM705086v1_genomic	GCA_007050865.1	Candidatus Bathyarchaeota	Bathyarchaeia	TACK	60	33.3	0	25	0	0	0	0	100	33.3	0
GCA_001918745.1_ASM191874v1_genomic	GCA_001918745.1	Crenarchaeota	Bathyarchaeia	TACK	100	66.7	0	25	100	0	100	0	50	0	0
GCA_017354675.1_ASM1735467v1_genomic	GCA_017354675.1	Candidatus Bathyarchaeota	Bathyarchaeia	TACK	100	50	0	12.5	100	0	0	0	50	0	0
GCA_013329615.1_ASM1332961v1_genomic	GCA_013329615.1	Candidatus Bathyarchaeota	Bathyarchaeia	TACK	40	50	0	12.5	100	0	0	0	50	0	0
GCA_003141855.1_20120800_E1X_genomic	GCA_003141855.1	Candidatus Bathyarchaeota	Bathyarchaeia	TACK	60	50	0	12.5	100	0	0	0	0	0	0
GCA_020341775.1_ASM2034177v1_genomic	GCA_020341775.1	Candidatus Bathyarchaeota	Bathyarchaeia	TACK	60	50	0	12.5	100	0	0	100	50	33.3	0
GCA_018396915.1_ASM1839691v1_genomic	GCA_018396915.1	Candidatus Bathyarchaeota	Bathyarchaeia	TACK	80	50	0	25	100	0	0	0	100	0	0
GCA_011776625.1_ASM1177662v1_genomic	GCA_011776625.1	Candidatus Bathyarchaeota	Bathyarchaeia	TACK	40	0	0	25	0	0	0	0	0	0	0
GCA_018396425.1_ASM1839642v1_genomic	GCA_018396425.1	Candidatus Bathyarchaeota	Bathyarchaeia	TACK	60	16.7	0	25	100	0	0	0	100	0	0
GCA_001774235.1_ASM177423v1_genomic	GCA_001774235.1	Candidatus Bathyarchaeota	Bathyarchaeia	TACK	60	50	0	12.5	100	0	0	0	0	0	0
GCA_020346725.1_ASM2034672v1_genomic	GCA_020346725.1	Candidatus Bathyarchaeota	Bathyarchaeia	TACK	40	16.7	0	0	0	0	0	100	100	33.3	0
GCA_005888795.1_ASM588879v1_genomic	GCA_005888795.1	Candidatus Bathyarchaeota	Bathyarchaeia	TACK	80	66.7	0	12.5	100	0	100	0	50	0	0
GCA_005888705.1_ASM588870v1_genomic	GCA_005888705.1	Candidatus Bathyarchaeota	Bathyarchaeia	TACK	80	66.7	0	12.5	100	0	0	0	0	0	0
GCA_018396755.1_ASM1839675v1_genomic	GCA_018396755.1	Candidatus Bathyarchaeota	Bathyarchaeia	TACK	80	50	0	12.5	100	0	0	0	0	0	0
GCA_001593845.1_ASM159384v1_genomic	GCA_001593845.1	Candidatus Bathyarchaeota	Bathyarchaeia	TACK	100	50	0	12.5	100	0	0	0	0	0	0
GCA_003601695.1_ASM360169v1_genomic	GCA_003601695.1	Candidatus Bathyarchaeota	Bathyarchaeia	TACK	60	50	0	12.5	100	0	0	0	0	0	0
GCA_018396975.1_ASM1839697v1_genomic	GCA_018396975.1	Candidatus Bathyarchaeota	Bathyarchaeia	TACK	60	50	0	12.5	100	0	0	0	0	0	0
GCA_005881615.1_ASM588161v1_genomic	GCA_005881615.1	Candidatus Bathyarchaeota	Bathyarchaeia	TACK	100	66.7	0	25	100	0	100	0	50	0	0
GCA_020355125.1_ASM2035512v1_genomic	GCA_020355125.1	Candidatus Bathyarchaeota	Bathyarchaeia	TACK	100	50	0	12.5	100	0	0	0	50	33.3	0
GCA_020348945.1_ASM2034894v1_genomic	GCA_020348945.1	Candidatus Bathyarchaeota	Bathyarchaeia	TACK	60	33.3	0	12.5	100	0	0	0	0	0	0
GCA_001920635.1_ASM192063v1_genomic	GCA_001920635.1	Crenarchaeota	Bathyarchaeia	TACK	100	33.3	0	25	0	0	0	0	100	0	0
GCA_001774245.1_ASM177424v1_genomic	GCA_001774245.1	Candidatus Bathyarchaeota	Bathyarchaeia	TACK	60	66.7	0	12.5	100	0	0	0	0	33.3	0
GCA_020352535.1_ASM2035253v1_genomic	GCA_020352535.1	Candidatus Bathyarchaeota	Bathyarchaeia	TACK	60	50	0	0	100	0	0	0	100	33.3	0
GCA_020348365.1_ASM2034836v1_genomic	GCA_020348365.1	Candidatus Bathyarchaeota	Bathyarchaeia	TACK	60	50	0	12.5	100	0	0	0	0	33.3	0
GCA_005884605.1_ASM588460v1_genomic	GCA_005884605.1	Candidatus Bathyarchaeota	Bathyarchaeia	TACK	100	50	0	12.5	100	0	0	0	50	0	0
GCA_013330975.1_ASM1333097v1_genomic	GCA_013330975.1	Candidatus Bathyarchaeota	Bathyarchaeia	TACK	60	50	0	0	100	0	0	0	50	0	0
GCA_002779555.1_ASM277955v1_genomic	GCA_002779555.1	Candidatus Bathyarchaeota	Bathyarchaeia	TACK	60	66.7	0	0	100	0	0	0	0	0	0
GCA_007049905.1_ASM704990v1_genomic	GCA_007049905.1	Candidatus Bathyarchaeota	Bathyarchaeia	TACK	40	50	0	0	100	0	0	0	50	0	0
GCA_018396515.1_ASM1839651v1_genomic	GCA_018396515.1	Candidatus Bathyarchaeota	Bathyarchaeia	TACK	80	50	0	0	100	0	0	0	0	0	0
GCA_003601735.1_ASM360173v1_genomic	GCA_003601735.1	Candidatus Bathyarchaeota	Bathyarchaeia	TACK	60	50	0	12.5	0	0	0	0	0	0	0
GCA_020354065.1_ASM2035406v1_genomic	GCA_020354065.1	Candidatus Bathyarchaeota	Bathyarchaeia	TACK	60	50	0	0	100	0	0	0	100	0	0
GCA_020346605.1_ASM2034660v1_genomic	GCA_020346605.1	Candidatus Bathyarchaeota	Bathyarchaeia	TACK	60	50	0	25	100	0	0	0	100	33.3	0
GCA_003601605.1_ASM360160v1_genomic	GCA_003601605.1	Candidatus Bathyarchaeota	Bathyarchaeia	TACK	60	33.3	0	0	100	0	0	0	0	0	0
GCA_003165195.1_20120700_S1D_genomic	GCA_003165195.1	Candidatus Bathyarchaeota	Bathyarchaeia	TACK	60	50	0	12.5	100	0	0	0	0	0	0
GCA_003601655.1_ASM360165v1_genomic	GCA_003601655.1	Candidatus Bathyarchaeota	Bathyarchaeia	TACK	60	50	0	0	100	0	0	0	0	0	0
GCA_023269895.1_ASM2326989v1_genomic	GCA_023269895.1	Candidatus Bathyarchaeota	Bathyarchaeia	TACK	60	50	0	12.5	100	0	0	0	0	0	0
GCA_001775965.1_ASM177596v1_genomic	GCA_001775965.1	Candidatus Bathyarchaeota	Bathyarchaeia	TACK	60	50	0	25	100	0	0	0	0	0	0
GCA_018397035.1_ASM1839703v1_genomic	GCA_018397035.1	Candidatus Bathyarchaeota	Bathyarchaeia	TACK	60	66.7	0	12.5	100	0	0	0	50	0	0
GCA_002782745.1_ASM278274v1_genomic	GCA_002782745.1	Candidatus Bathyarchaeota	Bathyarchaeia	TACK	20	33.3	0	0	0	0	0	0	0	0	0
GCA_003152735.1_20120700_E3M_genomic	GCA_003152735.1	Candidatus Bathyarchaeota	Bathyarchaeia	TACK	60	50	0	12.5	100	0	0	0	0	0	0
GCA_001775955.1_ASM177595v1_genomic	GCA_001775955.1	Candidatus Bathyarchaeota	Bathyarchaeia	TACK	80	50	0	25	100	0	0	0	0	0	0
GCA_017884685.1_ASM1788468v1_genomic	GCA_017884685.1	Candidatus Bathyarchaeota	Bathyarchaeia	TACK	60	16.7	0	0	0	0	0	0	0	0	0
GCA_001593875.1_ASM159387v1_genomic	GCA_001593875.1	Candidatus Bathyarchaeota	Bathyarchaeia	TACK	40	33.3	0	12.5	100	0	0	0	0	0	0
GCA_020345645.1_ASM2034564v1_genomic	GCA_020345645.1	Candidatus Bathyarchaeota	Bathyarchaeia	TACK	60	50	0	0	100	0	0	0	100	33.3	0
GCA_022709065.1_ASM2270906v1_genomic	GCA_022709065.1	Crenarchaeota	Bathyarchaeia	TACK	40	33.3	0	12.5	100	0	0	0	100	0	0
GCA_005882955.1_ASM588295v1_genomic	GCA_005882955.1	Candidatus Bathyarchaeota	Bathyarchaeia	TACK	100	66.7	0	25	100	0	100	0	50	0	0
GCA_014894195.1_ASM1489419v1_genomic	GCA_014894195.1	Candidatus Bathyarchaeota	Bathyarchaeia	TACK	40	50	0	25	100	0	0	0	0	0	0
GCA_003152955.1_20120700_E3M_genomic	GCA_003152955.1	Candidatus Bathyarchaeota	Bathyarchaeia	TACK	60	66.7	0	25	100	0	0	0	50	0	0
GCA_018396435.1_ASM1839643v1_genomic	GCA_018396435.1	Candidatus Bathyarchaeota	Bathyarchaeia	TACK	60	50	0	12.5	100	0	0	0	0	0	0
GCA_001776015.1_ASM177601v1_genomic	GCA_001776015.1	Candidatus Bathyarchaeota	Bathyarchaeia	TACK	60	50	0	12.5	100	0	0	0	0	0	0
GCA_902505595.1_MAG_SS9_genomic	GCA_902505595.1	Candidatus Bathyarchaeota	Bathyarchaeia	TACK	20	16.7	0	0	0	0	0	0	0	33.3	0
GCA_003133625.1_20120500_P19_genomic	GCA_003133625.1	Candidatus Bathyarchaeota	Bathyarchaeia	TACK	40	50	0	12.5	100	0	0	0	0	0	0
GCA_005884265.1_ASM588426v1_genomic	GCA_005884265.1	Candidatus Bathyarchaeota	Bathyarchaeia	TACK	100	66.7	0	25	100	0	100	0	100	0	0
GCA_005883075.1_ASM588307v1_genomic	GCA_005883075.1	Candidatus Bathyarchaeota	Bathyarchaeia	TACK	80	50	0	25	100	0	100	0	100	0	0
GCA_003138595.1_20110800_S3D_genomic.fna.faa	GCA_003138595.1	unclassified Euryarchaeota	Bog-38	Eukyarchaea	80	50	0	12.5	100	0	0	0	0	0	0
GCA_003154225.1_20120700_E3M_genomic.fna.faa	GCA_003154225.1	unclassified Euryarchaeota	Bog-38	Eukyarchaea	60	50	0	12.5	100	0	0	0	50	0	0
GCA_003156255.1_20120600_S2D_genomic.fna.faa	GCA_003156255.1	unclassified Euryarchaeota	Bog-38	Eukyarchaea	80	50	0	12.5	100	0	0	0	0	0	0
GCA_017885205.1_ASM1788520v1_genomic.fna.faa	GCA_017885205.1	unclassified Euryarchaeota	Bog-38	Eukyarchaea	20	33.3	0	12.5	0	0	0	0	0	0	0
GCA_003155875.1_20120700_E1M_genomic.fna.faa	GCA_003155875.1	unclassified Euryarchaeota	Bog-38	Eukyarchaea	60	50	0	12.5	100	0	0	0	50	0	0
GCA_003167795.1_20110700_S2D_genomic.fna.faa	GCA_003167795.1	unclassified Euryarchaeota	Bog-38	Eukyarchaea	80	33.3	0	12.5	100	0	0	0	0	0	0
GCA_003162535.1_20110600_E2D_genomic.fna.faa	GCA_003162535.1	unclassified Euryarchaeota	Bog-38	Eukyarchaea	60	50	0	12.5	100	0	0	0	50	0	0
GCA_003139855.1_20110800_S2M_genomic.fna.faa	GCA_003139855.1	unclassified Euryarchaeota	Bog-38	Eukyarchaea	80	50	0	12.5	100	0	0	0	0	0	0
GCA_003159695.1_20120700_S2X_genomic.fna.faa	GCA_003159695.1	unclassified Euryarchaeota	Bog-38	Eukyarchaea	80	33.3	0	12.5	100	0	0	0	0	0	0
GCA_003142045.1_20120800_E1D_genomic.fna.faa	GCA_003142045.1	unclassified Euryarchaeota	Bog-38	Eukyarchaea	60	50	0	12.5	100	0	0	0	50	0	0
GCA_003159405.1_20120700_S3X_genomic.fna.faa	GCA_003159405.1	unclassified Euryarchaeota	Bog-38	Eukyarchaea	80	50	0	12.5	100	0	0	0	0	0	0
GCA_003165375.1_20120700_S1D_genomic.fna.faa	GCA_003165375.1	unclassified Euryarchaeota	Bog-38	Eukyarchaea	80	33.3	0	12.5	100	0	0	0	0	0	0
GCA_003166275.1_20110700_S2M_genomic.fna.faa	GCA_003166275.1	unclassified Euryarchaeota	Bog-38	Eukyarchaea	80	50	0	12.5	100	0	0	0	0	0	0
GCA_003141075.1_20120800_S1D_genomic.fna.faa	GCA_003141075.1	unclassified Euryarchaeota	Bog-38	Eukyarchaea	80	50	0	12.5	100	0	0	0	0	0	0
GCA_003162075.1_20100900_E3D_genomic.fna.faa	GCA_003162075.1	unclassified Euryarchaeota	Bog-38	Eukyarchaea	20	33.3	0	12.5	100	0	0	0	50	0	0
GCA_003132625.1_20120500_P19_genomic.fna.faa	GCA_003132625.1	unclassified Euryarchaeota	Bog-38	Eukyarchaea	20	33.3	0	12.5	100	0	0	0	0	0	0
GCA_003168535.1_20110700_E1D_genomic.fna.faa	GCA_003168535.1	unclassified Euryarchaeota	Bog-38	Eukyarchaea	60	50	0	12.5	100	0	0	0	50	0	0
GCA_003170775.1_20110800_E2M_genomic.fna.faa	GCA_003170775.1	unclassified Euryarchaeota	Bog-38	Eukyarchaea	60	50	0	12.5	100	0	0	0	50	0	0
GCA_003141775.1_20120800_E2D_genomic.fna.faa	GCA_003141775.1	unclassified Euryarchaeota	Bog-38	Eukyarchaea	60	50	0	12.5	100	0	0	0	0	0	0
GCA_003171015.1_20110800_E1M_genomic.fna.faa	GCA_003171015.1	unclassified Euryarchaeota	Bog-38	Eukyarchaea	60	50	0	12.5	100	0	0	0	50	0	0
GCA_003155755.1_20120700_E2D_genomic.fna.faa	GCA_003155755.1	unclassified Euryarchaeota	Bog-38	Eukyarchaea	20	50	0	12.5	100	0	0	0	50	0	0
GCA_003162195.1_20100900_E1S_genomic.fna.faa	GCA_003162195.1	unclassified Euryarchaeota	Bog-38	Eukyarchaea	60	50	0	12.5	100	0	0	0	50	0	0
GCA_003159635.1_20120700_S3D_genomic.fna.faa	GCA_003159635.1	unclassified Euryarchaeota	Bog-38	Eukyarchaea	80	50	0	12.5	100	0	0	0	0	0	0
GCA_003170935.1_20110800_E2D_genomic.fna.faa	GCA_003170935.1	unclassified Euryarchaeota	Bog-38	Eukyarchaea	80	50	0	12.5	100	0	0	0	0	0	0
GCA_003171385.1_20110800_E1S_genomic.fna.faa	GCA_003171385.1	unclassified Euryarchaeota	Bog-38	Eukyarchaea	60	50	0	12.5	100	0	0	0	50	0	0
GCA_003158275.1_20120600_E3D_genomic.fna.faa	GCA_003158275.1	unclassified Euryarchaeota	Bog-38	Eukyarchaea	80	50	0	12.5	100	0	0	0	0	0	0
GCA_003158935.1_20120600_E1D_genomic.fna.faa	GCA_003158935.1	unclassified Euryarchaeota	Bog-38	Eukyarchaea	60	50	0	12.5	100	0	0	0	50	0	0
GCA_003157355.1_20120600_E3D_genomic.fna.faa	GCA_003157355.1	unclassified Euryarchaeota	Bog-38	Eukyarchaea	60	50	0	12.5	100	0	0	0	50	0	0
GCA_003170615.1_20110800_E2S_genomic.fna.faa	GCA_003170615.1	unclassified Euryarchaeota	Bog-38	Eukyarchaea	20	33.3	0	0	100	0	0	0	0	0	0
GCA_003155855.1_20120700_E1S_genomic.fna.faa	GCA_003155855.1	unclassified Euryarchaeota	Bog-38	Eukyarchaea	60	50	0	12.5	100	0	0	0	50	0	0
GCA_003163455.1_20120800_S1X_genomic.fna.faa	GCA_003163455.1	unclassified Euryarchaeota	Bog-38	Eukyarchaea	80	50	0	12.5	100	0	0	0	0	0	0
GCA_003136455.1_20111000_E2D_genomic.fna.faa	GCA_003136455.1	unclassified Euryarchaeota	Bog-38	Eukyarchaea	60	50	0	12.5	100	0	0	0	50	0	0
GCA_003168515.1_20110700_E1M_genomic.fna.faa	GCA_003168515.1	unclassified Euryarchaeota	Bog-38	Eukyarchaea	20	33.3	0	0	100	0	0	0	50	0	0
GCA_003168395.1_20110700_E3M_genomic.fna.faa	GCA_003168395.1	unclassified Euryarchaeota	Bog-38	Eukyarchaea	60	50	0	12.5	100	0	0	0	50	0	0
GCA_003161665.1_20110600_E3M_genomic.fna.faa	GCA_003161665.1	unclassified Euryarchaeota	Bog-38	Eukyarchaea	60	50	0	12.5	100	0	0	0	50	0	0
GCA_003169565.1_20110600_S2D_genomic.fna.faa	GCA_003169565.1	unclassified Euryarchaeota	Bog-38	Eukyarchaea	80	33.3	0	12.5	100	0	0	0	0	0	0
GCA_017885325.1_ASM1788532v1_genomic.fna.faa	GCA_017885325.1	unclassified Euryarchaeota	Bog-38	Eukyarchaea	20	50	0	12.5	100	0	0	0	50	0	0
GCA_003142655.1_20120800_E2S_genomic.fna.faa	GCA_003142655.1	unclassified Euryarchaeota	Bog-38	Eukyarchaea	60	50	0	12.5	100	0	0	0	50	0	0
GCA_003157805.1_20120600_E2D_genomic.fna.faa	GCA_003157805.1	unclassified Euryarchaeota	Bog-38	Eukyarchaea	20	50	0	0	100	0	0	0	50	0	0
GCA_003162745.1_20100900_E1D_genomic.fna.faa	GCA_003162745.1	unclassified Euryarchaeota	Bog-38	Eukyarchaea	20	33.3	0	12.5	100	0	0	0	0	0	0
GCA_003163595.1_20120800_S2X_genomic.fna.faa	GCA_003163595.1	unclassified Euryarchaeota	Bog-38	Eukyarchaea	80	50	0	12.5	100	0	0	0	0	0	0
GCA_003160575.1_20120700_S1X_genomic.fna.faa	GCA_003160575.1	unclassified Euryarchaeota	Bog-38	Eukyarchaea	80	33.3	0	12.5	100	0	0	0	0	0	0
GCA_003168415.1_20110700_E2M_genomic.fna.faa	GCA_003168415.1	unclassified Euryarchaeota	Bog-38	Eukyarchaea	40	33.3	0	12.5	100	0	0	0	50	0	0
GCA_003156955.1_20120600_E3M_genomic.fna.faa	GCA_003156955.1	unclassified Euryarchaeota	Bog-38	Eukyarchaea	40	50	0	12.5	100	0	0	0	50	0	0
GCA_003139895.1_20110800_S2D_genomic.fna.faa	GCA_003139895.1	unclassified Euryarchaeota	Bog-38	Eukyarchaea	80	50	0	12.5	100	0	0	0	0	0	0
GCA_003162175.1_20100900_E2D_genomic.fna.faa	GCA_003162175.1	unclassified Euryarchaeota	Bog-38	Eukyarchaea	60	50	0	0	100	0	0	0	50	0	0
GCA_003137055.1_20111000_E3D_genomic.fna.faa	GCA_003137055.1	unclassified Euryarchaeota	Bog-38	Eukyarchaea	60	33.3	0	0	100	0	0	0	50	0	0
GCA_003161795.1_20110600_E1D_genomic.fna.faa	GCA_003161795.1	unclassified Euryarchaeota	Bog-38	Eukyarchaea	60	50	0	0	0	0	0	0	50	0	0
GCA_003133305.1_20120500_P28_genomic.fna.faa	GCA_003133305.1	unclassified Euryarchaeota	Bog-38	Eukyarchaea	60	50	0	12.5	100	0	0	0	50	0	0
GCA_003155735.1_20120700_E2X_genomic.fna.faa	GCA_003155735.1	unclassified Euryarchaeota	Bog-38	Eukyarchaea	60	50	0	12.5	100	0	0	0	50	0	0
GCA_003168795.1_20110600_S3M_genomic.fna.faa	GCA_003168795.1	unclassified Euryarchaeota	Bog-38	Eukyarchaea	80	33.3	0	12.5	100	0	0	0	0	0	0
GCA_003161735.1_20110600_E3D_genomic.fna.faa	GCA_003161735.1	unclassified Euryarchaeota	Bog-38	Eukyarchaea	60	50	0	12.5	100	0	0	0	50	0	0
GCA_003139235.1_20110800_S1D_genomic.fna.faa	GCA_003139235.1	unclassified Euryarchaeota	Bog-38	Eukyarchaea	80	33.3	0	12.5	100	0	0	0	0	0	0
GCA_001800665.1_ASM180066v1_genomic.fna.faa	GCA_001800665.1	unclassified Euryarchaeota	E2	Eukyarchaea	80	33.3	0	12.5	100	0	0	0	0	33.3	0
GCA_019347805.1_ASM1934780v1_genomic.fna.faa	GCA_019347805.1	unclassified Euryarchaeota	E2	Eukyarchaea	80	50	0	12.5	100	0	0	0	0	0	0
GCA_016180755.1_ASM1618075v1_genomic.fna.faa	GCA_016180755.1	unclassified Euryarchaeota	E2	Eukyarchaea	60	33.3	0	25	100	0	0	0	0	0	0
GCA_017884425.1_ASM1788442v1_genomic.fna.faa	GCA_017884425.1	unclassified Euryarchaeota	E2	Eukyarchaea	20	16.7	0	0	100	100	0	0	0	0	0
GCA_002505885.1_ASM250588v1_genomic.fna.faa	GCA_002505885.1	unclassified Euryarchaeota	E2	Eukyarchaea	60	50	0	12.5	100	0	0	0	50	33.3	0
GCA_002506745.1_ASM250674v1_genomic.fna.faa	GCA_002506745.1	unclassified Euryarchaeota	E2	Eukyarchaea	60	33.3	0	0	100	100	0	0	0	0	0
GCA_017885605.1_ASM1788560v1_genomic.fna.faa	GCA_017885605.1	unclassified Euryarchaeota	E2	Eukyarchaea	60	50	0	12.5	100	0	0	0	50	33.3	0
GCA_002509175.1_ASM250917v1_genomic.fna.faa	GCA_002509175.1	unclassified Euryarchaeota	E2	Eukyarchaea	60	50	0	12.5	100	0	0	0	50	33.3	0
GCA_002497865.1_ASM249786v1_genomic.fna.faa	GCA_002497865.1	unclassified Euryarchaeota	E2	Eukyarchaea	60	33.3	0	12.5	100	0	0	0	50	33.3	0
GCA_002502685.1_ASM250268v1_genomic.fna.faa	GCA_002502685.1	unclassified Euryarchaeota	E2	Eukyarchaea	80	33.3	0	12.5	100	0	0	0	0	0	0
GCA_002496355.1_ASM249635v1_genomic.fna.faa	GCA_002496355.1	unclassified Euryarchaeota	E2	Eukyarchaea	60	33.3	0	0	100	0	0	0	50	33.3	0
GCA_017601285.1_ASM1760128v1_genomic	GCA_017601285.1	Candidatus Brockarchaeota	EX4484-205	TACK	60	33.3	0	12.5	0	0	0	0	0	0	0
GCA_017601365.1_ASM1760136v1_genomic	GCA_017601365.1	Candidatus Brockarchaeota	EX4484-205	TACK	80	50	0	0	100	0	0	0	0	0	0
GCA_017601395.1_ASM1760139v1_genomic	GCA_017601395.1	Candidatus Brockarchaeota	EX4484-205	TACK	80	50	0	0	100	0	0	0	100	0	0
GCA_017601245.1_ASM1760124v1_genomic	GCA_017601245.1	Candidatus Brockarchaeota	EX4484-205	TACK	80	50	0	0	100	0	0	0	0	0	0
GCA_017601185.1_ASM1760118v1_genomic	GCA_017601185.1	Candidatus Brockarchaeota	EX4484-205	TACK	80	50	0	0	100	0	0	0	0	0	0
GCA_017601325.1_ASM1760132v1_genomic	GCA_017601325.1	Candidatus Brockarchaeota	EX4484-205	TACK	20	50	0	0	100	0	0	0	0	0	0
GCA_017601145.1_ASM1760114v1_genomic	GCA_017601145.1	Candidatus Brockarchaeota	EX4484-205	TACK	60	50	0	12.5	100	0	0	0	0	0	0
GCA_023256075.1_ASM2325607v1_genomic	GCA_023256075.1	Thaumarchaeota	EX4484-205	TACK	60	33.3	0	12.5	100	0	0	0	0	0	0
GCA_017601265.1_ASM1760126v1_genomic	GCA_017601265.1	Candidatus Brockarchaeota	EX4484-205	TACK	100	50	0	0	100	0	0	0	0	0	0
GCA_002255045.1_ASM225504v1_genomic	GCA_002255045.1	Candidatus Bathyarchaeota	EX4484-205	TACK	60	50	0	0	100	0	0	0	0	0	0
GCA_019429125.1_ASM1942912v1_genomic	GCA_019429125.1	unclassified DPANN group	EX4484-52	DPANN	0	0	0	0	0	0	0	0	0	0	0
GCA_017610545.1_ASM1761054v1_genomic	GCA_017610545.1	Candidatus Nanohaloarchaeota	EX4484-52	DPANN	60	50	0	0	100	0	0	0	0	0	0
GCA_017610525.1_ASM1761052v1_genomic	GCA_017610525.1	Candidatus Nanohaloarchaeota	EX4484-52	DPANN	80	50	0	0	100	0	0	0	0	0	0
GCA_017610465.1_ASM1761046v1_genomic	GCA_017610465.1	Candidatus Pacearchaeota	EX4484-52	DPANN	40	50	0	0	0	0	0	0	0	0	0
GCA_019429005.1_ASM1942900v1_genomic	GCA_019429005.1	unclassified DPANN group	EX4484-52	DPANN	20	50	0	0	100	0	0	0	0	0	0
GCA_001515185.1_DG-33_genomic.fna.faa	GCA_001515185.1	Hadesarchaea	Hadarchaeia	Eukyarchaea	100	50	0	12.5	100	0	0	0	0	0	0
GCA_002779005.1_ASM277900v1_genomic.fna.faa	GCA_002779005.1	Hadesarchaea	Hadarchaeia	Eukyarchaea	100	33.3	0	0	100	0	0	0	0	0	0
GCA_014361095.1_ASM1436109v1_genomic.fna.faa	GCA_014361095.1	Hadesarchaea	Hadarchaeia	Eukyarchaea	100	50	0	25	100	0	0	0	0	0	0
GCA_001515195.1_DG-33-1_genomic.fna.faa	GCA_001515195.1	Hadesarchaea	Hadarchaeia	Eukyarchaea	100	50	0	0	100	0	0	0	0	0	0
GCA_013391085.1_ASM1339108v1_genomic.fna.faa	GCA_013391085.1	Stenosarchaea group	Halobacteria	Eukyarchaea	100	66.7	0	25	100	100	0	0	0	0	0
GCA_900003525.1_ASM90000352v1_genomic.fna.faa	GCA_900003525.1	Stenosarchaea group	Halobacteria	Eukyarchaea	100	50	0	12.5	100	100	0	0	0	0	0
GCA_001989615.1_ASM198961v1_genomic.fna.faa	GCA_001989615.1	Stenosarchaea group	Halobacteria	Eukyarchaea	100	50	0	25	100	100	0	0	0	0	0
GCA_013391105.1_ASM1339110v1_genomic.fna.faa	GCA_013391105.1	Stenosarchaea group	Halobacteria	Eukyarchaea	100	66.7	0	25	100	100	0	0	0	0	0
GCA_900129775.1_IMG-taxon_2695420988_annotated_assembly_genomic.fna.faa	GCA_900129775.1	Stenosarchaea group	Halobacteria	Eukyarchaea	100	50	0	12.5	100	100	0	0	0	0	0
GCA_001886955.1_ASM188695v1_genomic.fna.faa	GCA_001886955.1	Stenosarchaea group	Halobacteria	Eukyarchaea	100	66.7	0	12.5	100	100	0	0	0	0	0
GCA_005155585.1_ASM515558v1_genomic.fna.faa	GCA_005155585.1	Stenosarchaea group	Halobacteria	Eukyarchaea	100	50	0	25	100	100	0	0	0	0	0
GCA_000416025.1_HN6_031912_genomic.fna.faa	GCA_000416025.1	Stenosarchaea group	Halobacteria	Eukyarchaea	100	66.7	0	12.5	100	100	0	0	0	0	0
GCA_900003505.1_ASM90000350v1_genomic.fna.faa	GCA_900003505.1	Stenosarchaea group	Halobacteria	Eukyarchaea	100	50	0	12.5	100	100	0	0	0	0	0
GCA_003977755.1_ASM397775v1_genomic.fna.faa	GCA_003977755.1	Stenosarchaea group	Halobacteria	Eukyarchaea	100	66.7	0	12.5	100	100	0	0	0	0	0
GCA_005435195.1_ASM543519v1_genomic.fna.faa	GCA_005435195.1	Stenosarchaea group	Halobacteria	Eukyarchaea	100	50	0	25	100	100	0	0	0	0	0
GCA_003605575.1_ASM360557v1_genomic.fna.faa	GCA_003605575.1	Stenosarchaea group	Halobacteria	Eukyarchaea	100	50	0	0	100	100	0	0	0	0	0
GCA_014647415.1_ASM1464741v1_genomic.fna.faa	GCA_014647415.1	Stenosarchaea group	Halobacteria	Eukyarchaea	100	50	0	25	100	100	0	0	0	0	0
GCA_003022845.1_ASM302284v1_genomic.fna.faa	GCA_003022845.1	Stenosarchaea group	Halobacteria	Eukyarchaea	100	50	0	25	100	100	0	0	0	0	0
GCA_001368915.1_PRJEB5949_assembly_1_genomic.fna.faa	GCA_001368915.1	Stenosarchaea group	Halobacteria	Eukyarchaea	100	66.7	0	25	100	100	0	0	0	0	0
GCA_019599485.1_ASM1959948v1_genomic.fna.faa	GCA_019599485.1	Stenosarchaea group	Halobacteria	Eukyarchaea	100	66.7	0	37.5	100	100	0	0	50	0	0
GCA_900101245.1_IMG-taxon_2651869596_annotated_assembly_genomic.fna.faa	GCA_900101245.1	Stenosarchaea group	Halobacteria	Eukyarchaea	100	66.7	0	12.5	100	100	0	0	0	0	0
GCA_900004275.1_ASM90000427v1_genomic.fna.faa	GCA_900004275.1	Stenosarchaea group	Halobacteria	Eukyarchaea	100	50	0	12.5	100	100	0	0	0	0	0
GCA_002252835.1_ASM225283v1_genomic.fna.faa	GCA_002252835.1	Stenosarchaea group	Halobacteria	Eukyarchaea	100	66.7	0	25	100	100	0	0	0	0	0
GCA_012163165.1_ASM1216316v1_genomic.fna.faa	GCA_012163165.1	Stenosarchaea group	Halobacteria	Eukyarchaea	100	66.7	0	37.5	100	100	0	0	0	0	0
GCA_900003565.1_ASM90000356v1_genomic.fna.faa	GCA_900003565.1	Stenosarchaea group	Halobacteria	Eukyarchaea	100	50	0	12.5	100	100	0	0	0	0	0
GCA_002252875.1_ASM225287v1_genomic.fna.faa	GCA_002252875.1	Stenosarchaea group	Halobacteria	Eukyarchaea	100	50	0	25	100	100	0	0	0	0	0
GCA_024138165.1_ASM2413816v1_genomic.fna.faa	GCA_024138165.1	Stenosarchaea group	Halobacteria	Eukyarchaea	100	66.7	0	12.5	100	100	0	0	0	0	0
GCA_000196895.1_ASM19689v1_genomic.fna.faa	GCA_000196895.1	Stenosarchaea group	Halobacteria	Eukyarchaea	100	50	0	25	100	100	0	0	0	0	0
GCA_000306765.2_ASM30676v2_genomic.fna.faa	GCA_000306765.2	Stenosarchaea group	Halobacteria	Eukyarchaea	100	66.7	0	25	100	100	0	0	0	0	0
GCA_004765795.1_ASM476579v1_genomic.fna.faa	GCA_004765795.1	Stenosarchaea group	Halobacteria	Eukyarchaea	100	50	0	12.5	100	100	0	0	0	0	0
GCA_005435045.1_ASM543504v1_genomic.fna.faa	GCA_005435045.1	Stenosarchaea group	Halobacteria	Eukyarchaea	100	50	0	25	100	100	0	0	0	0	0
GCA_020150815.1_ASM2015081v1_genomic.fna.faa	GCA_020150815.1	Stenosarchaea group	Halobacteria	Eukyarchaea	100	50	0	25	100	100	0	0	0	0	0
GCA_002252735.1_ASM225273v1_genomic.fna.faa	GCA_002252735.1	Stenosarchaea group	Halobacteria	Eukyarchaea	100	50	0	25	100	100	0	0	0	0	0
GCA_020097815.1_ASM2009781v1_genomic.fna.faa	GCA_020097815.1	Stenosarchaea group	Halobacteria	Eukyarchaea	100	50	0	25	100	100	0	0	0	0	0
GCA_003021975.1_ASM302197v1_genomic.fna.faa	GCA_003021975.1	Stenosarchaea group	Halobacteria	Eukyarchaea	100	50	0	0	100	100	0	0	0	0	0
GCA_003022785.1_ASM302278v1_genomic.fna.faa	GCA_003022785.1	Stenosarchaea group	Halobacteria	Eukyarchaea	100	50	0	12.5	100	100	0	0	0	0	0
GCA_005239175.1_ASM523917v1_genomic.fna.faa	GCA_005239175.1	Stenosarchaea group	Halobacteria	Eukyarchaea	100	66.7	0	25	100	100	0	0	50	0	0
GCA_000009185.1_ASM918v1_genomic.fna.faa	GCA_000009185.1	Stenosarchaea group	Halobacteria	Eukyarchaea	100	66.7	0	0	100	100	0	0	0	0	0
GCA_022450005.1_ASM2245000v1_genomic.fna.faa	GCA_022450005.1	Stenosarchaea group	Halobacteria	Eukyarchaea	60	50	0	12.5	100	100	0	0	0	0	0
GCA_000069025.1_ASM6902v1_genomic.fna.faa	GCA_000069025.1	Stenosarchaea group	Halobacteria	Eukyarchaea	100	50	0	25	100	100	0	0	0	0	0
GCA_020614375.1_ASM2061437v1_genomic.fna.faa	GCA_020614375.1	Stenosarchaea group	Halobacteria	Eukyarchaea	100	50	0	25	100	100	100	0	0	0	0
GCA_014647455.2_ASM1464745v2_genomic.fna.faa	GCA_014647455.2	Stenosarchaea group	Halobacteria	Eukyarchaea	100	50	0	12.5	100	100	0	0	0	0	0
GCA_900110455.1_IMG-taxon_2671180170_annotated_assembly_genomic.fna.faa	GCA_900110455.1	Stenosarchaea group	Halobacteria	Eukyarchaea	100	66.7	0	25	100	100	0	0	0	0	0
GCA_002355635.1_ASM235563v1_genomic.fna.faa	GCA_002355635.1	Stenosarchaea group	Halobacteria	Eukyarchaea	100	50	0	0	100	100	0	0	0	0	0
GCA_002355655.1_ASM235565v1_genomic.fna.faa	GCA_002355655.1	Stenosarchaea group	Halobacteria	Eukyarchaea	100	66.7	0	25	100	100	0	0	0	0	0
GCA_004681185.1_ASM468118v1_genomic.fna.faa	GCA_004681185.1	Stenosarchaea group	Halobacteria	Eukyarchaea	100	66.7	0	25	100	100	0	0	0	0	0
GCA_020405245.1_ASM2040524v1_genomic.fna.faa	GCA_020405245.1	Stenosarchaea group	Halobacteria	Eukyarchaea	100	66.7	0	12.5	100	100	0	0	0	0	0
GCA_003342675.1_ASM334267v1_genomic.fna.faa	GCA_003342675.1	Stenosarchaea group	Halobacteria	Eukyarchaea	100	50	0	25	100	100	0	0	0	0	0
GCA_017094465.1_ASM1709446v1_genomic.fna.faa	GCA_017094465.1	Stenosarchaea group	Halobacteria	Eukyarchaea	100	66.7	0	12.5	100	100	0	0	0	0	0
GCA_000025325.1_ASM2532v1_genomic.fna.faa	GCA_000025325.1	Stenosarchaea group	Halobacteria	Eukyarchaea	100	66.7	0	37.5	100	100	0	0	0	0	0
GCA_006861665.1_ASM686166v1_genomic.fna.faa	GCA_006861665.1	Stenosarchaea group	Halobacteria	Eukyarchaea	100	66.7	0	0	100	100	0	0	100	0	0
GCA_903989495.1_D2T7_genomic.fna.faa	GCA_903989495.1	Stenosarchaea group	Halobacteria	Eukyarchaea	100	66.7	0	0	0	100	0	0	0	0	0
GCA_004799605.1_ASM479960v1_genomic.fna.faa	GCA_004799605.1	Stenosarchaea group	Halobacteria	Eukyarchaea	100	50	0	25	100	100	0	0	0	0	0
GCA_024300625.1_ASM2430062v1_genomic.fna.faa	GCA_024300625.1	Stenosarchaea group	Halobacteria	Eukyarchaea	100	50	0	25	100	100	0	0	0	0	0
GCA_001190965.1_ASM119096v1_genomic.fna.faa	GCA_001190965.1	Stenosarchaea group	Halobacteria	Eukyarchaea	100	66.7	0	12.5	100	100	0	0	0	0	0
GCA_005239435.1_ASM523943v1_genomic.fna.faa	GCA_005239435.1	Stenosarchaea group	Halobacteria	Eukyarchaea	100	50	0	25	100	100	0	0	0	0	0
GCA_024296685.1_ASM2429668v1_genomic.fna.faa	GCA_024296685.1	Stenosarchaea group	Halobacteria	Eukyarchaea	100	66.7	0	37.5	100	100	0	0	0	0	0
GCA_000485535.1_ASM48553v1_genomic.fna.faa	GCA_000485535.1	Stenosarchaea group	Halobacteria	Eukyarchaea	100	50	0	25	100	100	0	0	0	0	0
GCA_000025625.1_ASM2562v1_genomic.fna.faa	GCA_000025625.1	Stenosarchaea group	Halobacteria	Eukyarchaea	100	66.7	0	37.5	100	100	0	0	0	0	0
GCA_006861655.1_ASM686165v1_genomic.fna.faa	GCA_006861655.1	Stenosarchaea group	Halobacteria	Eukyarchaea	100	50	0	0	100	100	0	0	0	0	0
GCA_012726115.1_ASM1272611v1_genomic.fna.faa	GCA_012726115.1	Stenosarchaea group	Halobacteria	Eukyarchaea	100	50	0	25	100	100	0	0	0	0	0
GCA_003022055.1_ASM302205v1_genomic.fna.faa	GCA_003022055.1	Stenosarchaea group	Halobacteria	Eukyarchaea	60	50	0	12.5	100	100	0	0	0	0	0
GCA_000723845.1_PRJEB5511_assembly_1_genomic.fna.faa	GCA_000723845.1	Stenosarchaea group	Halobacteria	Eukyarchaea	100	66.7	0	12.5	100	100	0	0	0	0	0
GCA_900114455.1_IMG-taxon_2619618990_annotated_assembly_genomic.fna.faa	GCA_900114455.1	Stenosarchaea group	Halobacteria	Eukyarchaea	100	50	0	12.5	100	100	0	0	0	0	0
GCA_017094525.1_ASM1709452v1_genomic.fna.faa	GCA_017094525.1	Stenosarchaea group	Halobacteria	Eukyarchaea	100	66.7	0	0	100	100	0	0	0	0	0
GCA_005435035.1_ASM543503v1_genomic.fna.faa	GCA_005435035.1	Stenosarchaea group	Halobacteria	Eukyarchaea	100	66.7	0	25	100	100	0	0	0	0	0
GCA_003023165.1_ASM302316v1_genomic.fna.faa	GCA_003023165.1	Stenosarchaea group	Halobacteria	Eukyarchaea	100	50	0	25	100	100	0	0	0	0	0
GCA_004803735.1_ASM480373v1_genomic.fna.faa	GCA_004803735.1	Stenosarchaea group	Halobacteria	Eukyarchaea	100	50	0	25	100	100	0	0	0	0	0
GCA_900102305.1_IMG-taxon_2651870125_annotated_assembly_genomic.fna.faa	GCA_900102305.1	Stenosarchaea group	Halobacteria	Eukyarchaea	100	66.7	0	25	100	100	0	0	0	0	0
GCA_000223905.1_ASM22390v1_genomic.fna.faa	GCA_000223905.1	Stenosarchaea group	Halobacteria	Eukyarchaea	100	50	0	25	100	100	0	0	0	0	0
GCA_004765805.1_ASM476580v1_genomic.fna.faa	GCA_004765805.1	Stenosarchaea group	Halobacteria	Eukyarchaea	100	50	0	25	100	100	0	0	0	0	0
GCA_004118325.1_ASM411832v1_genomic.fna.faa	GCA_004118325.1	Stenosarchaea group	Halobacteria	Eukyarchaea	100	66.7	0	25	100	100	0	0	0	0	0
GCA_002496675.1_ASM249667v1_genomic.fna.faa	GCA_002496675.1	unclassified Euryarchaeota	Halobacteria	Eukyarchaea	100	50	0	0	100	100	0	0	0	0	0
GCA_010119195.1_ASM1011919v1_genomic.fna.faa	GCA_010119195.1	Stenosarchaea group	Halobacteria	Eukyarchaea	100	66.7	0	25	100	100	0	0	0	0	0
GCA_900100385.1_IMG-taxon_2651870124_annotated_assembly_genomic.fna.faa	GCA_900100385.1	Stenosarchaea group	Halobacteria	Eukyarchaea	100	50	0	25	100	100	0	0	0	0	0
GCA_002952775.1_ASM295277v1_genomic.fna.faa	GCA_002952775.1	Stenosarchaea group	Halobacteria	Eukyarchaea	100	50	0	12.5	100	100	0	0	0	0	0
GCA_002727105.1_ASM272710v1_genomic.fna.faa	GCA_002727105.1	Stenosarchaea group	Halobacteria	Eukyarchaea	100	50	0	25	100	100	0	0	0	0	0
GCA_001488575.1_Halobacterium_hubeiense_JI20-1_genomic.fna.faa	GCA_001488575.1	Stenosarchaea group	Halobacteria	Eukyarchaea	100	50	0	12.5	100	100	0	0	0	0	0
GCA_003721175.2_ASM372117v2_genomic.fna.faa	GCA_003721175.2	Stenosarchaea group	Halobacteria	Eukyarchaea	100	50	0	25	100	100	0	0	0	0	0
GCA_024138125.1_ASM2413812v1_genomic.fna.faa	GCA_024138125.1	Stenosarchaea group	Halobacteria	Eukyarchaea	100	50	0	25	100	100	0	0	50	0	0
GCA_003021755.1_ASM302175v1_genomic.fna.faa	GCA_003021755.1	Stenosarchaea group	Halobacteria	Eukyarchaea	60	50	0	12.5	100	100	0	0	0	0	0
GCA_003351065.1_ASM335106v1_genomic.fna.faa	GCA_003351065.1	Stenosarchaea group	Halobacteria	Eukyarchaea	100	66.7	0	37.5	100	100	0	0	0	0	0
GCA_000281695.1_ASM28169v1_genomic.fna.faa	GCA_000281695.1	Stenosarchaea group	Halobacteria	Eukyarchaea	100	66.7	0	25	100	100	0	0	0	0	0
GCA_004126515.1_ASM412651v1_genomic.fna.faa	GCA_004126515.1	Stenosarchaea group	Halobacteria	Eukyarchaea	100	66.7	0	25	100	100	0	0	0	0	0
GCA_900109695.1_IMG-taxon_2639762639_annotated_assembly_genomic.fna.faa	GCA_900109695.1	Stenosarchaea group	Halobacteria	Eukyarchaea	100	66.7	0	12.5	100	100	0	0	0	0	0
GCA_013330005.1_ASM1333000v1_genomic.fna.faa	GCA_013330005.1	Stenosarchaea group	Halobacteria	Eukyarchaea	100	33.3	0	12.5	100	100	0	0	0	0	0
GCA_009392895.1_ASM939289v1_genomic.fna.faa	GCA_009392895.1	Stenosarchaea group	Halobacteria	Eukyarchaea	100	66.7	0	25	100	100	0	0	0	0	0
GCA_000230715.3_ASM23071v3_genomic.fna.faa	GCA_000230715.3	Stenosarchaea group	Halobacteria	Eukyarchaea	100	66.7	0	25	100	100	0	0	0	0	0
GCA_003022045.1_ASM302204v1_genomic.fna.faa	GCA_003022045.1	Stenosarchaea group	Halobacteria	Eukyarchaea	60	50	0	12.5	100	100	0	0	0	0	0
GCA_000416105.1_J07AB_HB67select_genomic.fna.faa	GCA_000416105.1	Stenosarchaea group	Halobacteria	Eukyarchaea	80	33.3	0	12.5	100	100	0	0	0	0	0
GCA_003021015.1_ASM302101v1_genomic.fna.faa	GCA_003021015.1	Stenosarchaea group	Halobacteria	Eukyarchaea	100	50	0	25	100	100	0	0	0	0	0
GCA_002135005.1_ASM213500v1_genomic.fna.faa	GCA_002135005.1	Stenosarchaea group	Halobacteria	Eukyarchaea	100	66.7	0	12.5	100	100	0	0	0	0	0
GCA_013839515.1_ASM1383951v1_genomic.fna.faa	GCA_013839515.1	Stenosarchaea group	Halobacteria	Eukyarchaea	100	50	0	25	100	100	0	0	0	0	0
GCA_017094505.1_ASM1709450v1_genomic.fna.faa	GCA_017094505.1	Stenosarchaea group	Halobacteria	Eukyarchaea	100	66.7	0	12.5	100	100	0	0	0	0	0
GCA_017357405.1_ASM1735740v1_genomic.fna.faa	GCA_017357405.1	Stenosarchaea group	Halobacteria	Eukyarchaea	100	66.7	0	25	100	100	100	0	0	0	0
GCA_000455345.1_Halgo_genomic.fna.faa	GCA_000455345.1	Stenosarchaea group	Halobacteria	Eukyarchaea	100	66.7	0	37.5	100	100	0	0	0	0	0
GCA_023544685.1_ASM2354468v1_genomic.fna.faa	GCA_023544685.1	Stenosarchaea group	Halobacteria	Eukyarchaea	80	50	0	12.5	100	100	0	0	0	0	0
GCA_008831545.1_ASM883154v1_genomic.fna.faa	GCA_008831545.1	Stenosarchaea group	Halobacteria	Eukyarchaea	100	66.7	0	25	100	100	0	0	0	0	0
GCA_009900715.1_ASM990071v1_genomic.fna.faa	GCA_009900715.1	Stenosarchaea group	Halobacteria	Eukyarchaea	100	50	0	12.5	100	100	0	0	0	0	0
GCA_000415985.1_HQW2_08err_032412a_genomic.fna.faa	GCA_000415985.1	Stenosarchaea group	Halobacteria	Eukyarchaea	100	66.7	0	0	100	100	0	0	0	0	0
GCA_005435095.1_ASM543509v1_genomic.fna.faa	GCA_005435095.1	Stenosarchaea group	Halobacteria	Eukyarchaea	100	66.7	0	25	100	100	0	0	0	0	0
GCA_003021165.1_ASM302116v1_genomic.fna.faa	GCA_003021165.1	Stenosarchaea group	Halobacteria	Eukyarchaea	40	50	0	25	100	100	0	0	0	0	0
GCA_000224475.1_ASM22447v1_genomic.fna.faa	GCA_000224475.1	Stenosarchaea group	Halobacteria	Eukyarchaea	100	50	0	25	100	100	0	0	0	0	0
GCA_000006805.1_ASM680v1_genomic.fna.faa	GCA_000006805.1	Stenosarchaea group	Halobacteria	Eukyarchaea	100	50	0	25	100	100	0	0	0	0	0
GCA_024204665.1_ASM2420466v1_genomic.fna.faa	GCA_024204665.1	Stenosarchaea group	Halobacteria	Eukyarchaea	100	66.7	0	12.5	100	100	100	0	0	0	0
GCA_000022205.1_ASM2220v1_genomic.fna.faa	GCA_000022205.1	Stenosarchaea group	Halobacteria	Eukyarchaea	100	50	0	12.5	100	100	0	0	100	0	0
GCA_002252895.1_ASM225289v1_genomic.fna.faa	GCA_002252895.1	Stenosarchaea group	Halobacteria	Eukyarchaea	100	66.7	0	12.5	100	100	0	0	0	0	0
GCA_005543295.1_ASM554329v1_genomic.fna.faa	GCA_005543295.1	Stenosarchaea group	Halobacteria	Eukyarchaea	100	66.7	0	25	100	100	0	0	50	0	0
GCA_900108095.1_IMG-taxon_2617270925_annotated_assembly_genomic.fna.faa	GCA_900108095.1	Stenosarchaea group	Halobacteria	Eukyarchaea	100	66.7	0	25	100	100	0	0	0	0	0
GCA_900112205.1_IMG-taxon_2693429869_annotated_assembly_genomic.fna.faa	GCA_900112205.1	Stenosarchaea group	Halobacteria	Eukyarchaea	100	66.7	0	37.5	100	100	100	0	0	0	0
GCA_002906575.1_ASM290657v1_genomic.fna.faa	GCA_002906575.1	Stenosarchaea group	Halobacteria	Eukyarchaea	100	50	0	25	100	100	0	0	0	0	0
GCA_001482285.1_ASM148228v1_genomic.fna.faa	GCA_001482285.1	Stenosarchaea group	Halobacteria	Eukyarchaea	100	66.7	0	12.5	100	100	0	0	0	0	0
GCA_003021795.1_ASM302179v1_genomic.fna.faa	GCA_003021795.1	Stenosarchaea group	Halobacteria	Eukyarchaea	100	50	0	12.5	100	0	0	0	0	0	0
GCA_016917855.1_ASM1691785v1_genomic.fna.faa	GCA_016917855.1	Stenosarchaea group	Halobacteria	Eukyarchaea	100	50	0	25	100	100	0	0	0	0	0
GCA_011765365.1_ASM1176536v1_genomic.fna.faa	GCA_011765365.1	Stenosarchaea group	Halobacteria	Eukyarchaea	100	66.7	0	25	100	100	0	0	0	0	0
GCA_000746205.1_ASM74620v1_genomic.fna.faa	GCA_000746205.1	Stenosarchaea group	Halobacteria	Eukyarchaea	100	50	0	12.5	100	100	0	0	0	0	0
GCA_001261915.1_Halorubrum_SD626R_genomic.fna.faa	GCA_001261915.1	Stenosarchaea group	Halobacteria	Eukyarchaea	100	66.7	0	0	100	100	0	0	0	0	0
GCA_003021005.1_ASM302100v1_genomic.fna.faa	GCA_003021005.1	Stenosarchaea group	Halobacteria	Eukyarchaea	100	50	0	25	100	100	0	0	0	0	0
GCA_003023215.1_ASM302321v1_genomic.fna.faa	GCA_003023215.1	Stenosarchaea group	Halobacteria	Eukyarchaea	100	50	0	25	100	100	0	0	0	0	0
GCA_023238205.1_ASM2323820v1_genomic.fna.faa	GCA_023238205.1	Stenosarchaea group	Halobacteria	Eukyarchaea	100	50	0	25	100	100	100	0	0	0	0
GCA_002215285.1_ASM221528v1_genomic.fna.faa	GCA_002215285.1	Stenosarchaea group	Halobacteria	Eukyarchaea	100	50	0	12.5	100	100	0	0	0	0	0
GCA_003020945.1_ASM302094v1_genomic.fna.faa	GCA_003020945.1	Stenosarchaea group	Halobacteria	Eukyarchaea	100	50	0	25	100	100	0	0	0	0	0
GCA_009807105.1_ASM980710v1_genomic.fna.faa	GCA_009807105.1	Stenosarchaea group	Halobacteria	Eukyarchaea	100	50	0	37.5	100	100	0	0	0	0	0
GCA_023028345.1_ASM2302834v1_genomic.fna.faa	GCA_023028345.1	Stenosarchaea group	Halobacteria	Eukyarchaea	100	50	0	25	100	100	0	0	0	0	0
GCA_000470655.1_HATI1_genomic.fna.faa	GCA_000470655.1	Stenosarchaea group	Halobacteria	Eukyarchaea	100	50	0	25	100	100	0	0	0	0	0
GCA_003023535.1_ASM302353v1_genomic.fna.faa	GCA_003023535.1	Stenosarchaea group	Halobacteria	Eukyarchaea	100	50	0	12.5	100	0	0	0	0	0	0
GCA_004209855.1_ASM420985v1_genomic.fna.faa	GCA_004209855.1	Stenosarchaea group	Halobacteria	Eukyarchaea	100	66.7	0	25	100	100	0	0	0	0	0
GCA_000784335.1_ASM78433v1_genomic.fna.faa	GCA_000784335.1	Stenosarchaea group	Halobacteria	Eukyarchaea	100	66.7	0	37.5	100	100	0	0	0	0	0
GCA_900114435.1_IMG-taxon_2667527389_annotated_assembly_genomic.fna.faa	GCA_900114435.1	Stenosarchaea group	Halobacteria	Eukyarchaea	100	50	0	25	100	100	0	0	0	0	0
GCA_019879105.1_ASM1987910v1_genomic.fna.faa	GCA_019879105.1	Stenosarchaea group	Halobacteria	Eukyarchaea	100	66.7	0	25	100	100	0	0	0	0	0
GCA_009762275.1_ASM976227v1_genomic.fna.faa	GCA_009762275.1	Stenosarchaea group	Halobacteria	Eukyarchaea	100	66.7	0	25	100	100	0	0	0	0	0
GCA_014530665.1_ASM1453066v1_genomic.fna.faa	GCA_014530665.1	Stenosarchaea group	Halobacteria	Eukyarchaea	100	66.7	0	12.5	100	100	0	0	0	0	0
GCA_002496825.1_ASM249682v1_genomic.fna.faa	GCA_002496825.1	unclassified Euryarchaeota	Halobacteria	Eukyarchaea	100	50	0	0	100	100	0	0	0	0	0
GCA_002844195.1_ASM284419v1_genomic.fna.faa	GCA_002844195.1	Stenosarchaea group	Halobacteria	Eukyarchaea	100	50	0	25	100	100	0	0	0	0	0
GCA_002844335.1_ASM284433v1_genomic.fna.faa	GCA_002844335.1	Stenosarchaea group	Halobacteria	Eukyarchaea	100	50	0	25	100	100	0	0	0	0	0
GCA_003342695.1_ASM334269v1_genomic.fna.faa	GCA_003342695.1	Stenosarchaea group	Halobacteria	Eukyarchaea	100	50	0	25	100	100	0	0	0	0	0
GCA_023204835.1_ASM2320483v1_genomic.fna.faa	GCA_023204835.1	Stenosarchaea group	Halobacteria	Eukyarchaea	100	66.7	0	25	100	100	0	0	0	0	0
GCA_003022905.1_ASM302290v1_genomic.fna.faa	GCA_003022905.1	Stenosarchaea group	Halobacteria	Eukyarchaea	100	50	0	12.5	100	100	0	0	0	0	0
GCA_004015825.1_ASM401582v1_genomic.fna.faa	GCA_004015825.1	Stenosarchaea group	Halobacteria	Eukyarchaea	100	50	0	25	100	100	0	0	0	0	0
GCA_000023945.1_ASM2394v1_genomic.fna.faa	GCA_000023945.1	Stenosarchaea group	Halobacteria	Eukyarchaea	100	50	0	25	100	100	0	0	0	0	0
GCA_003020965.1_ASM302096v1_genomic.fna.faa	GCA_003020965.1	Stenosarchaea group	Halobacteria	Eukyarchaea	100	50	0	25	100	100	0	0	0	0	0
GCA_012726095.1_ASM1272609v1_genomic.fna.faa	GCA_012726095.1	Stenosarchaea group	Halobacteria	Eukyarchaea	100	50	0	12.5	100	100	0	0	0	0	0
GCA_009806985.1_ASM980698v1_genomic.fna.faa	GCA_009806985.1	Stenosarchaea group	Halobacteria	Eukyarchaea	100	66.7	0	25	100	100	0	0	0	0	0
GCA_023703795.1_ASM2370379v1_genomic.fna.faa	GCA_023703795.1	Stenosarchaea group	Halobacteria	Eukyarchaea	100	50	0	12.5	100	100	0	0	0	0	0
GCA_003021325.1_ASM302132v1_genomic.fna.faa	GCA_003021325.1	Stenosarchaea group	Halobacteria	Eukyarchaea	100	50	0	12.5	100	0	0	0	50	0	0
GCA_000023965.1_ASM2396v1_genomic.fna.faa	GCA_000023965.1	Stenosarchaea group	Halobacteria	Eukyarchaea	100	50	0	25	100	100	0	0	0	0	0
GCA_900108505.1_IMG-taxon_2651870118_annotated_assembly_genomic.fna.faa	GCA_900108505.1	Stenosarchaea group	Halobacteria	Eukyarchaea	100	50	0	0	100	100	0	0	0	0	0
GCA_020405205.1_ASM2040520v1_genomic.fna.faa	GCA_020405205.1	Stenosarchaea group	Halobacteria	Eukyarchaea	100	66.7	0	37.5	100	100	100	0	0	0	0
GCA_000011085.1_ASM1108v1_genomic.fna.faa	GCA_000011085.1	Stenosarchaea group	Halobacteria	Eukyarchaea	100	66.7	0	25	100	100	0	0	0	0	0
GCA_003022725.1_ASM302272v1_genomic.fna.faa	GCA_003022725.1	Stenosarchaea group	Halobacteria	Eukyarchaea	100	50	0	25	100	100	0	0	0	0	0
GCA_003021745.1_ASM302174v1_genomic.fna.faa	GCA_003021745.1	Stenosarchaea group	Halobacteria	Eukyarchaea	100	66.7	0	25	100	100	0	0	0	0	0
GCA_002252805.1_ASM225280v1_genomic.fna.faa	GCA_002252805.1	Stenosarchaea group	Halobacteria	Eukyarchaea	60	66.7	0	25	100	100	0	0	0	0	0
GCA_900106715.1_IMG-taxon_2693429892_annotated_assembly_genomic.fna.faa	GCA_900106715.1	Stenosarchaea group	Halobacteria	Eukyarchaea	100	66.7	0	25	100	100	0	0	0	0	0
GCA_003021055.1_ASM302105v1_genomic.fna.faa	GCA_003021055.1	Stenosarchaea group	Halobacteria	Eukyarchaea	60	50	0	0	100	100	0	0	0	0	0
GCA_005435055.1_ASM543505v1_genomic.fna.faa	GCA_005435055.1	Stenosarchaea group	Halobacteria	Eukyarchaea	100	50	0	25	100	100	0	0	0	0	0
GCA_000685635.1_ASM68563v1_genomic.fna.faa	GCA_000685635.1	Stenosarchaea group	Halobacteria	Eukyarchaea	100	66.7	0	25	100	100	0	0	0	0	0
GCA_024218775.1_ASM2421877v1_genomic.fna.faa	GCA_024218775.1	Stenosarchaea group	Halobacteria	Eukyarchaea	100	50	0	25	100	100	0	0	0	0	0
GCA_003022745.1_ASM302274v1_genomic.fna.faa	GCA_003022745.1	Stenosarchaea group	Halobacteria	Eukyarchaea	100	50	0	25	100	100	0	0	0	0	0
GCA_003022765.1_ASM302276v1_genomic.fna.faa	GCA_003022765.1	Stenosarchaea group	Halobacteria	Eukyarchaea	80	66.7	0	25	100	100	0	0	0	0	0
GCA_000237865.1_ASM23786v1_genomic.fna.faa	GCA_000237865.1	Stenosarchaea group	Halobacteria	Eukyarchaea	100	66.7	0	12.5	100	100	0	0	0	0	0
GCA_004765785.1_ASM476578v1_genomic.fna.faa	GCA_004765785.1	Stenosarchaea group	Halobacteria	Eukyarchaea	100	66.7	0	12.5	100	100	0	0	50	0	0
GCA_023699475.1_ASM2369947v1_genomic.fna.faa	GCA_023699475.1	Stenosarchaea group	Halobacteria	Eukyarchaea	100	50	0	12.5	100	100	0	0	0	0	0
GCA_000415945.1_HX64_HX5_0315125.1_genomic.fna.faa	GCA_000415945.1	Stenosarchaea group	Halobacteria	Eukyarchaea	60	50	0	12.5	100	100	0	0	0	0	0
GCA_014969745.1_ASM1496974v1_genomic.fna.faa	GCA_014969745.1	Stenosarchaea group	Halobacteria	Eukyarchaea	100	66.7	0	25	100	100	0	0	0	0	0
GCA_023093535.1_ASM2309353v1_genomic.fna.faa	GCA_023093535.1	Stenosarchaea group	Halobacteria	Eukyarchaea	100	66.7	0	25	100	100	0	0	0	0	0
GCA_003022815.1_ASM302281v1_genomic.fna.faa	GCA_003022815.1	Stenosarchaea group	Halobacteria	Eukyarchaea	60	50	0	12.5	100	100	0	0	0	0	0
GCA_000416065.1_HN4_v3_031612_genomic.fna.faa	GCA_000416065.1	Stenosarchaea group	Halobacteria	Eukyarchaea	100	66.7	0	0	100	100	0	0	0	0	0
GCA_009690625.1_ASM969062v1_genomic.fna.faa	GCA_009690625.1	Stenosarchaea group	Halobacteria	Eukyarchaea	100	50	0	25	100	100	0	0	0	0	0
GCA_002252965.1_ASM225296v1_genomic.fna.faa	GCA_002252965.1	Stenosarchaea group	Halobacteria	Eukyarchaea	100	50	0	25	100	100	0	0	0	0	0
GCA_010092465.1_ASM1009246v1_genomic.fna.faa	GCA_010092465.1	Stenosarchaea group	Halobacteria	Eukyarchaea	100	50	0	0	100	100	0	0	0	0	0
GCA_024227995.1_ASM2422799v1_genomic.fna.faa	GCA_024227995.1	Stenosarchaea group	Halobacteria	Eukyarchaea	100	50	0	25	100	100	0	0	0	0	0
GCA_900110215.1_IMG-taxon_2654588107_annotated_assembly_genomic.fna.faa	GCA_900110215.1	Stenosarchaea group	Halobacteria	Eukyarchaea	100	50	0	25	100	100	0	0	0	0	0
GCA_003023415.1_ASM302341v1_genomic.fna.faa	GCA_003023415.1	Stenosarchaea group	Halobacteria	Eukyarchaea	100	16.7	0	25	100	100	0	0	0	0	0
GCA_003021335.1_ASM302133v1_genomic.fna.faa	GCA_003021335.1	Stenosarchaea group	Halobacteria	Eukyarchaea	100	50	0	12.5	100	100	0	0	0	0	0
GCA_017094445.1_ASM1709444v1_genomic.fna.faa	GCA_017094445.1	Stenosarchaea group	Halobacteria	Eukyarchaea	100	66.7	0	12.5	100	100	0	0	0	0	0
GCA_020736485.1_ASM2073648v1_genomic.fna.faa	GCA_020736485.1	Stenosarchaea group	Halobacteria	Eukyarchaea	100	50	0	25	100	100	0	0	0	0	0
GCA_005310945.1_ASM531094v1_genomic.fna.faa	GCA_005310945.1	Stenosarchaea group	Halobacteria	Eukyarchaea	100	66.7	0	25	100	100	0	0	0	0	0
GCA_003021725.1_ASM302172v1_genomic.fna.faa	GCA_003021725.1	Stenosarchaea group	Halobacteria	Eukyarchaea	100	50	0	25	100	100	0	0	0	0	0
GCA_010692905.1_ASM1069290v1_genomic.fna.faa	GCA_010692905.1	Stenosarchaea group	Halobacteria	Eukyarchaea	100	66.7	0	12.5	100	100	0	0	0	0	0
GCA_900111485.1_IMG-taxon_2642422550_annotated_assembly_genomic.fna.faa	GCA_900111485.1	Stenosarchaea group	Halobacteria	Eukyarchaea	100	66.7	0	12.5	100	100	0	0	0	0	0
GCA_002135045.1_ASM213504v1_genomic.fna.faa	GCA_002135045.1	Stenosarchaea group	Halobacteria	Eukyarchaea	100	50	0	25	100	100	0	0	0	0	0
GCA_003023445.1_ASM302344v1_genomic.fna.faa	GCA_003023445.1	Stenosarchaea group	Halobacteria	Eukyarchaea	40	50	0	12.5	100	100	0	0	0	0	0
GCA_006543045.1_ASM654304v1_genomic.fna.faa	GCA_006543045.1	Stenosarchaea group	Halobacteria	Eukyarchaea	100	50	0	12.5	100	100	0	0	0	0	0
GCA_002252755.1_ASM225275v1_genomic.fna.faa	GCA_002252755.1	Stenosarchaea group	Halobacteria	Eukyarchaea	100	66.7	0	25	100	100	0	0	0	0	0
GCA_005435015.1_ASM543501v1_genomic.fna.faa	GCA_005435015.1	Stenosarchaea group	Halobacteria	Eukyarchaea	100	50	0	25	100	100	0	0	0	0	0
GCA_900108165.1_IMG-taxon_2619618869_annotated_assembly_genomic.fna.faa	GCA_900108165.1	Stenosarchaea group	Halobacteria	Eukyarchaea	100	66.7	0	25	100	100	0	0	0	0	0
GCA_013402875.1_ASM1340287v1_genomic.fna.faa	GCA_013402875.1	Stenosarchaea group	Halobacteria	Eukyarchaea	100	50	0	25	100	100	0	0	50	0	0
GCA_017352095.1_ASM1735209v1_genomic.fna.faa	GCA_017352095.1	Stenosarchaea group	Halobacteria	Eukyarchaea	100	50	0	37.5	100	100	0	0	0	0	0
GCA_024298845.1_ASM2429884v1_genomic.fna.faa	GCA_024298845.1	Stenosarchaea group	Halobacteria	Eukyarchaea	100	50	0	25	100	100	0	0	0	0	0
GCA_003022025.1_ASM302202v1_genomic.fna.faa	GCA_003022025.1	Stenosarchaea group	Halobacteria	Eukyarchaea	60	50	0	12.5	100	100	0	0	0	0	0
GCA_000172995.2_ASM17299v2_genomic.fna.faa	GCA_000172995.2	Stenosarchaea group	Halobacteria	Eukyarchaea	100	66.7	0	25	100	100	0	0	0	0	0
GCA_000504565.2_ASM50456v2_genomic.fna.faa	GCA_000504565.2	Stenosarchaea group	Halobacteria	Eukyarchaea	100	50	0	25	100	100	0	0	0	0	0
GCA_004087835.1_ASM408783v1_genomic.fna.faa	GCA_004087835.1	Stenosarchaea group	Halobacteria	Eukyarchaea	100	50	0	12.5	100	100	0	0	50	0	0
GCA_022807515.1_ASM2280751v1_genomic.fna.faa	GCA_022807515.1	Stenosarchaea group	Halobacteria	Eukyarchaea	80	50	0	25	100	100	0	0	0	0	0
GCA_001462205.1_HalopeDYS1.0_genomic.fna.faa	GCA_001462205.1	Stenosarchaea group	Halobacteria	Eukyarchaea	100	50	0	25	100	100	0	0	0	0	0
GCA_019823105.1_ASM1982310v1_genomic.fna.faa	GCA_019823105.1	Stenosarchaea group	Halobacteria	Eukyarchaea	100	50	0	12.5	100	100	0	0	0	0	0
GCA_004944975.1_ASM494497v1_genomic.fna.faa	GCA_004944975.1	Stenosarchaea group	Halobacteria	Eukyarchaea	100	50	0	12.5	100	100	0	0	0	0	0
GCA_900003575.1_ASM90000357v1_genomic.fna.faa	GCA_900003575.1	Stenosarchaea group	Halobacteria	Eukyarchaea	100	50	0	12.5	100	100	0	0	0	0	0
GCA_004143485.2_ASM414348v2_genomic.fna.faa	GCA_004143485.2	Stenosarchaea group	Halobacteria	Eukyarchaea	100	50	0	12.5	100	100	100	0	0	0	0
GCA_004114995.1_ASM411499v1_genomic.fna.faa	GCA_004114995.1	Stenosarchaea group	Halobacteria	Eukyarchaea	100	66.7	0	25	100	100	0	0	50	0	0
GCA_013415885.1_ASM1341588v1_genomic.fna.faa	GCA_013415885.1	Stenosarchaea group	Halobacteria	Eukyarchaea	100	50	0	37.5	100	100	0	0	0	0	0
GCA_003023185.1_ASM302318v1_genomic.fna.faa	GCA_003023185.1	Stenosarchaea group	Halobacteria	Eukyarchaea	100	50	0	0	100	100	0	0	0	0	0
GCA_003021365.1_ASM302136v1_genomic.fna.faa	GCA_003021365.1	Stenosarchaea group	Halobacteria	Eukyarchaea	60	50	0	12.5	100	0	0	0	0	0	0
GCA_013401515.1_ASM1340151v1_genomic.fna.faa	GCA_013401515.1	Stenosarchaea group	Halobacteria	Eukyarchaea	100	50	0	25	100	100	0	0	0	0	0
GCA_024449025.1_ASM2444902v1_genomic.fna.faa	GCA_024449025.1	Stenosarchaea group	Halobacteria	Eukyarchaea	100	50	0	25	100	100	0	0	0	0	0
GCA_012726155.1_ASM1272615v1_genomic.fna.faa	GCA_012726155.1	Stenosarchaea group	Halobacteria	Eukyarchaea	100	50	0	25	100	100	0	0	0	0	0
GCA_005435185.1_ASM543518v1_genomic.fna.faa	GCA_005435185.1	Stenosarchaea group	Halobacteria	Eukyarchaea	100	66.7	0	12.5	100	100	0	0	0	0	0
GCA_000026045.1_ASM2604v1_genomic.fna.faa	GCA_000026045.1	Stenosarchaea group	Halobacteria	Eukyarchaea	100	66.7	0	12.5	100	100	0	0	0	0	0
GCA_002503845.1_ASM250384v1_genomic.fna.faa	GCA_002503845.1	unclassified Euryarchaeota	Halobacteria	Eukyarchaea	100	50	0	0	100	100	0	0	0	0	0
GCA_004150385.1_ASM415038v1_genomic.fna.faa	GCA_004150385.1	Stenosarchaea group	Halobacteria	Eukyarchaea	80	50	0	25	100	100	0	0	0	0	0
GCA_002156705.1_ASM215670v1_genomic.fna.faa	GCA_002156705.1	Stenosarchaea group	Halobacteria	Eukyarchaea	100	66.7	0	37.5	100	100	0	0	0	0	0
GCA_009184575.1_ASM918457v1_genomic.fna.faa	GCA_009184575.1	Stenosarchaea group	Halobacteria	Eukyarchaea	100	66.7	0	12.5	100	100	0	0	0	0	0
GCA_019599405.1_ASM1959940v1_genomic.fna.faa	GCA_019599405.1	Stenosarchaea group	Halobacteria	Eukyarchaea	100	66.7	0	37.5	100	100	0	0	50	0	0
GCA_005890195.1_ASM589019v1_genomic.fna.faa	GCA_005890195.1	Stenosarchaea group	Halobacteria	Eukyarchaea	100	66.7	0	12.5	100	100	0	0	0	0	0
GCA_024218815.1_ASM2421881v1_genomic.fna.faa	GCA_024218815.1	Stenosarchaea group	Halobacteria	Eukyarchaea	100	50	0	25	100	100	0	0	0	0	0
GCA_012726105.1_ASM1272610v1_genomic.fna.faa	GCA_012726105.1	Stenosarchaea group	Halobacteria	Eukyarchaea	100	66.7	0	12.5	100	100	0	0	0	0	0
GCA_000827835.1_ASM82783v1_genomic.fna.faa	GCA_000827835.1	Stenosarchaea group	Halobacteria	Eukyarchaea	100	50	0	25	100	100	0	0	0	0	0
GCA_000230955.3_ASM23095v3_genomic.fna.faa	GCA_000230955.3	Stenosarchaea group	Halobacteria	Eukyarchaea	100	50	0	12.5	100	100	0	0	0	0	0
GCA_000328685.1_ASM32868v1_genomic.fna.faa	GCA_000328685.1	Stenosarchaea group	Halobacteria	Eukyarchaea	100	66.7	0	37.5	100	100	0	0	0	0	0
GCA_003023565.1_ASM302356v1_genomic.fna.faa	GCA_003023565.1	Stenosarchaea group	Halobacteria	Eukyarchaea	100	50	0	25	100	100	0	0	0	0	0
GCA_023238445.1_ASM2323844v1_genomic.fna.faa	GCA_023238445.1	Stenosarchaea group	Halobacteria	Eukyarchaea	100	50	0	25	100	100	100	0	0	0	0
GCA_023008585.1_ASM2300858v1_genomic.fna.faa	GCA_023008585.1	Stenosarchaea group	Halobacteria	Eukyarchaea	100	66.7	0	25	100	100	0	0	0	0	0
GCA_000226975.3_ASM22697v3_genomic.fna.faa	GCA_000226975.3	Stenosarchaea group	Halobacteria	Eukyarchaea	100	66.7	0	25	100	100	0	0	0	0	0
GCA_021233435.1_ASM2123343v1_genomic.fna.faa	GCA_021233435.1	Stenosarchaea group	Halobacteria	Eukyarchaea	100	50	0	25	100	100	100	0	0	0	0
GCA_024227435.1_ASM2422743v1_genomic.fna.faa	GCA_024227435.1	Stenosarchaea group	Halobacteria	Eukyarchaea	100	66.7	0	12.5	100	100	0	0	0	0	0
GCA_002252725.1_ASM225272v1_genomic.fna.faa	GCA_002252725.1	Stenosarchaea group	Halobacteria	Eukyarchaea	100	66.7	0	25	100	100	0	0	0	0	0
GCA_023028225.1_ASM2302822v1_genomic.fna.faa	GCA_023028225.1	Stenosarchaea group	Halobacteria	Eukyarchaea	100	50	0	37.5	100	100	0	0	0	0	0
GCA_009663395.1_ASM966339v1_genomic.fna.faa	GCA_009663395.1	Stenosarchaea group	Halobacteria	Eukyarchaea	100	66.7	0	25	100	100	0	0	0	0	0
GCA_019880225.1_ASM1988022v1_genomic.fna.faa	GCA_019880225.1	Stenosarchaea group	Halobacteria	Eukyarchaea	100	50	0	25	100	100	0	0	0	0	0
GCA_002252935.1_ASM225293v1_genomic.fna.faa	GCA_002252935.1	Stenosarchaea group	Halobacteria	Eukyarchaea	100	50	0	12.5	100	100	0	0	0	0	0
GCA_903989525.1_D2T1_genomic.fna.faa	GCA_903989525.1	Stenosarchaea group	Halobacteria	Eukyarchaea	100	66.7	0	0	100	100	0	0	0	0	0
GCA_007655485.1_ASM765548v1_genomic.fna.faa	GCA_007655485.1	Stenosarchaea group	Halobacteria	Eukyarchaea	100	66.7	0	37.5	100	100	0	0	0	0	0
GCA_016906025.1_ASM1690602v1_genomic.fna.faa	GCA_016906025.1	Stenosarchaea group	Halobacteria	Eukyarchaea	100	66.7	0	12.5	100	100	0	0	0	0	0
GCA_005435025.1_ASM543502v1_genomic.fna.faa	GCA_005435025.1	Stenosarchaea group	Halobacteria	Eukyarchaea	100	66.7	0	25	100	100	0	0	0	0	0
GCA_002727095.1_ASM272709v1_genomic.fna.faa	GCA_002727095.1	Stenosarchaea group	Halobacteria	Eukyarchaea	100	66.7	0	25	100	100	0	0	0	0	0
GCA_013402815.2_ASM1340281v2_genomic.fna.faa	GCA_013402815.2	Stenosarchaea group	Halobacteria	Eukyarchaea	100	66.7	0	25	100	100	0	0	0	0	0
GCA_021233415.1_ASM2123341v1_genomic.fna.faa	GCA_021233415.1	Stenosarchaea group	Halobacteria	Eukyarchaea	100	50	0	25	100	100	0	0	0	0	0
GCA_020105915.1_ASM2010591v1_genomic.fna.faa	GCA_020105915.1	Stenosarchaea group	Halobacteria	Eukyarchaea	100	50	0	37.5	100	100	0	0	0	0	0
GCA_900156425.1_IMG-taxon_2681812914_annotated_assembly_genomic.fna.faa	GCA_900156425.1	Stenosarchaea group	Halobacteria	Eukyarchaea	100	50	0	12.5	100	100	100	0	0	0	0
GCA_016917835.3_ASM1691783v3_genomic.fna.faa	GCA_016917835.3	Stenosarchaea group	Halobacteria	Eukyarchaea	100	50	0	25	100	100	0	0	0	0	0
GCA_000416085.1_J07ABselected_genomic.fna.faa	GCA_000416085.1	Stenosarchaea group	Halobacteria	Eukyarchaea	100	66.7	0	25	100	100	0	0	0	0	0
GCA_003383025.1_ASM338302v1_genomic.fna.faa	GCA_003383025.1	Stenosarchaea group	Halobacteria	Eukyarchaea	100	66.7	0	12.5	100	100	0	0	0	0	0
GCA_023913515.1_ASM2391351v1_genomic.fna.faa	GCA_023913515.1	Stenosarchaea group	Halobacteria	Eukyarchaea	100	66.7	0	37.5	100	100	100	0	0	0	0
GCA_011627345.1_ASM1162734v1_genomic.fna.faa	GCA_011627345.1	Stenosarchaea group	Halobacteria	Eukyarchaea	100	50	0	12.5	100	100	0	0	0	0	0
GCA_003021245.1_ASM302124v1_genomic.fna.faa	GCA_003021245.1	Stenosarchaea group	Halobacteria	Eukyarchaea	100	33.3	0	12.5	100	100	0	0	0	0	0
GCA_017352155.2_ASM1735215v2_genomic.fna.faa	GCA_017352155.2	Stenosarchaea group	Halobacteria	Eukyarchaea	100	66.7	0	12.5	100	100	0	0	0	0	0
GCA_003021145.1_ASM302114v1_genomic.fna.faa	GCA_003021145.1	Stenosarchaea group	Halobacteria	Eukyarchaea	100	50	0	12.5	100	100	0	0	0	0	0
GCA_021431925.1_ASM2143192v1_genomic.fna.faa	GCA_021431925.1	Stenosarchaea group	Halobacteria	Eukyarchaea	100	50	0	25	100	100	0	0	0	0	0
GCA_004765815.2_ASM476581v2_genomic.fna.faa	GCA_004765815.2	Stenosarchaea group	Halobacteria	Eukyarchaea	100	50	0	25	100	100	0	0	0	0	0
GCA_003023525.1_ASM302352v1_genomic.fna.faa	GCA_003023525.1	Stenosarchaea group	Halobacteria	Eukyarchaea	80	50	0	12.5	100	0	0	0	0	0	0
GCA_005435135.1_ASM543513v1_genomic.fna.faa	GCA_005435135.1	Stenosarchaea group	Halobacteria	Eukyarchaea	100	50	0	25	100	100	0	0	0	0	0
GCA_022869805.1_ASM2286980v1_genomic.fna.faa	GCA_022869805.1	Stenosarchaea group	Halobacteria	Eukyarchaea	100	66.7	0	37.5	100	100	0	0	0	0	0
GCA_900107665.1_IMG-taxon_2617270898_annotated_assembly_genomic.fna.faa	GCA_900107665.1	Stenosarchaea group	Halobacteria	Eukyarchaea	100	66.7	0	0	100	100	0	0	0	0	0
GCA_022561895.1_ASM2256189v1_genomic.fna.faa	GCA_022561895.1	unclassified Euryarchaeota	Halobacteria	Eukyarchaea	100	50	0	12.5	100	100	0	0	0	0	0
GCA_018200015.1_ASM1820001v1_genomic.fna.faa	GCA_018200015.1	Stenosarchaea group	Halobacteria	Eukyarchaea	100	66.7	0	25	100	100	0	0	0	0	0
GCA_024138145.1_ASM2413814v1_genomic.fna.faa	GCA_024138145.1	Stenosarchaea group	Halobacteria	Eukyarchaea	100	66.7	0	25	100	100	0	0	0	0	0
GCA_020614395.1_ASM2061439v1_genomic.fna.faa	GCA_020614395.1	Stenosarchaea group	Halobacteria	Eukyarchaea	100	50	0	0	100	100	0	0	0	0	0
GCA_000513435.1_HRSP_AJ67_genomic.fna.faa	GCA_000513435.1	Stenosarchaea group	Halobacteria	Eukyarchaea	80	0	0	12.5	100	100	0	0	0	0	0
GCA_003382685.1_ASM338268v1_genomic.fna.faa	GCA_003382685.1	Stenosarchaea group	Halobacteria	Eukyarchaea	100	50	0	25	100	100	0	0	50	0	0
GCA_007671685.1_ASM767168v1_genomic.fna.faa	GCA_007671685.1	Stenosarchaea group	Halobacteria	Eukyarchaea	100	66.7	0	12.5	100	100	0	0	0	0	0
GCA_003021285.1_ASM302128v1_genomic.fna.faa	GCA_003021285.1	Stenosarchaea group	Halobacteria	Eukyarchaea	40	50	0	25	100	100	0	0	0	0	0
GCA_002252925.1_ASM225292v1_genomic.fna.faa	GCA_002252925.1	Stenosarchaea group	Halobacteria	Eukyarchaea	100	50	0	25	100	100	0	0	0	0	0
GCA_003021785.1_ASM302178v1_genomic.fna.faa	GCA_003021785.1	Stenosarchaea group	Halobacteria	Eukyarchaea	100	66.7	0	25	100	100	0	0	0	0	0
GCA_003021115.1_ASM302111v1_genomic.fna.faa	GCA_003021115.1	Stenosarchaea group	Halobacteria	Eukyarchaea	60	33.3	0	12.5	100	100	0	0	50	0	0
GCA_004698125.1_ASM469812v1_genomic.fna.faa	GCA_004698125.1	Stenosarchaea group	Halobacteria	Eukyarchaea	100	50	0	37.5	100	100	0	0	0	0	0
GCA_009184545.1_ASM918454v1_genomic.fna.faa	GCA_009184545.1	Stenosarchaea group	Halobacteria	Eukyarchaea	100	66.7	0	12.5	100	100	0	0	0	0	0
GCA_000025685.1_ASM2568v1_genomic.fna.faa	GCA_000025685.1	Stenosarchaea group	Halobacteria	Eukyarchaea	100	66.7	0	12.5	100	100	0	0	0	0	0
GCA_000403645.1_ASM40364v1_genomic.fna.faa	GCA_000403645.1	Stenosarchaea group	Halobacteria	Eukyarchaea	100	66.7	0	25	100	100	0	0	0	0	0
GCA_017094485.1_ASM1709448v1_genomic.fna.faa	GCA_017094485.1	Stenosarchaea group	Halobacteria	Eukyarchaea	100	50	0	25	100	100	0	0	0	0	0
GCA_009834785.1_ASM983478v1_genomic.fna.faa	GCA_009834785.1	Stenosarchaea group	Halobacteria	Eukyarchaea	100	66.7	0	37.5	100	100	0	0	0	0	0
GCA_002727125.1_ASM272712v1_genomic.fna.faa	GCA_002727125.1	Stenosarchaea group	Halobacteria	Eukyarchaea	100	66.7	0	12.5	100	100	0	0	0	0	0
GCA_000230735.3_ASM23073v3_genomic.fna.faa	GCA_000230735.3	Stenosarchaea group	Halobacteria	Eukyarchaea	100	66.7	0	37.5	100	100	0	0	0	0	0
GCA_000455365.1_HdjelfamassiliensisIIH2_genomic.fna.faa	GCA_000455365.1	Stenosarchaea group	Halobacteria	Eukyarchaea	100	66.7	0	37.5	100	100	0	0	0	0	0
GCA_003022925.1_ASM302292v1_genomic.fna.faa	GCA_003022925.1	Stenosarchaea group	Halobacteria	Eukyarchaea	100	50	0	25	100	100	0	0	0	0	0
GCA_001305655.1_ASM130565v1_genomic.fna.faa	GCA_001305655.1	Stenosarchaea group	Halobacteria	Eukyarchaea	100	50	0	25	100	100	0	0	0	0	0
GCA_900156475.1_IMG-taxon_2681812919_annotated_assembly_genomic.fna.faa	GCA_900156475.1	Stenosarchaea group	Halobacteria	Eukyarchaea	100	50	0	37.5	100	100	0	0	0	0	0
GCA_003023195.1_ASM302319v1_genomic.fna.faa	GCA_003023195.1	Stenosarchaea group	Halobacteria	Eukyarchaea	100	50	0	12.5	100	100	0	0	0	0	0
GCA_003021705.1_ASM302170v1_genomic.fna.faa	GCA_003021705.1	Stenosarchaea group	Halobacteria	Eukyarchaea	100	50	0	25	100	100	0	0	0	0	0
GCA_004150395.1_ASM415039v1_genomic.fna.faa	GCA_004150395.1	Stenosarchaea group	Halobacteria	Eukyarchaea	100	66.7	0	25	100	100	0	0	0	0	0
GCA_903989535.1_D2T31_genomic.fna.faa	GCA_903989535.1	Stenosarchaea group	Halobacteria	Eukyarchaea	100	66.7	0	0	100	100	0	0	0	0	0
GCA_003697845.1_ASM369784v1_genomic.fna.faa	GCA_003697845.1	Stenosarchaea group	Halobacteria	Eukyarchaea	100	66.7	0	0	100	100	0	0	0	0	0
GCA_004799665.1_ASM479966v1_genomic.fna.faa	GCA_004799665.1	Stenosarchaea group	Halobacteria	Eukyarchaea	100	66.7	0	25	100	100	0	0	0	0	0
GCA_020700235.1_ASM2070023v1_genomic.fna.faa	GCA_020700235.1	Stenosarchaea group	Halobacteria	Eukyarchaea	100	50	0	12.5	100	100	0	0	0	0	0
GCA_019693215.1_ASM1969321v1_genomic.fna.faa	GCA_019693215.1	Stenosarchaea group	Halobacteria	Eukyarchaea	100	50	0	12.5	100	100	0	0	0	0	0
GCA_000690595.2_ASM69059v2_genomic.fna.faa	GCA_000690595.2	Stenosarchaea group	Halobacteria	Eukyarchaea	100	66.7	0	37.5	100	100	0	0	0	0	0
GCA_020405225.1_ASM2040522v1_genomic.fna.faa	GCA_020405225.1	Stenosarchaea group	Halobacteria	Eukyarchaea	100	66.7	0	37.5	100	100	0	0	0	0	0
GCA_009217585.1_ASM921758v1_genomic.fna.faa	GCA_009217585.1	Stenosarchaea group	Halobacteria	Eukyarchaea	100	50	0	25	100	100	0	0	0	0	0
GCA_003990725.2_ASM399072v2_genomic.fna.faa	GCA_003990725.2	Stenosarchaea group	Halobacteria	Eukyarchaea	100	66.7	0	25	100	100	0	0	0	0	0
GCA_018228765.1_ASM1822876v1_genomic.fna.faa	GCA_018228765.1	Stenosarchaea group	Halobacteria	Eukyarchaea	100	50	0	25	100	100	0	0	0	0	0
GCA_900111935.1_IMG-taxon_2617270732_annotated_assembly_genomic.fna.faa	GCA_900111935.1	Stenosarchaea group	Halobacteria	Eukyarchaea	100	50	0	25	100	100	0	0	0	0	0
GCA_016065055.1_ASM1606505v1_genomic.fna.faa	GCA_016065055.1	Stenosarchaea group	Halobacteria	Eukyarchaea	100	50	0	37.5	100	100	0	0	0	0	0
GCA_003020985.1_ASM302098v1_genomic.fna.faa	GCA_003020985.1	Stenosarchaea group	Halobacteria	Eukyarchaea	100	66.7	0	12.5	100	100	0	0	0	0	0
GCA_003022865.1_ASM302286v1_genomic.fna.faa	GCA_003022865.1	Stenosarchaea group	Halobacteria	Eukyarchaea	60	33.3	0	12.5	100	0	0	0	0	0	0
GCA_000296615.1_ASM29661v1_genomic.fna.faa	GCA_000296615.1	Stenosarchaea group	Halobacteria	Eukyarchaea	100	50	0	25	100	100	0	0	0	0	0
GCA_022870485.1_ASM2287048v1_genomic.fna.faa	GCA_022870485.1	Stenosarchaea group	Halobacteria	Eukyarchaea	100	66.7	0	12.5	100	100	0	0	0	0	0
GCA_003022885.1_ASM302288v1_genomic.fna.faa	GCA_003022885.1	Stenosarchaea group	Halobacteria	Eukyarchaea	60	50	0	12.5	0	100	0	0	0	0	0
GCA_900102375.1_IMG-taxon_2617270761_annotated_assembly_genomic.fna.faa	GCA_900102375.1	Stenosarchaea group	Halobacteria	Eukyarchaea	100	66.7	0	25	100	100	0	0	0	0	0
GCA_003023465.1_ASM302346v1_genomic.fna.faa	GCA_003023465.1	Stenosarchaea group	Halobacteria	Eukyarchaea	60	66.7	0	12.5	100	100	0	0	0	0	0
GCA_003022945.1_ASM302294v1_genomic.fna.faa	GCA_003022945.1	Stenosarchaea group	Halobacteria	Eukyarchaea	100	50	0	12.5	100	100	0	0	0	0	0
GCA_005239425.1_ASM523942v1_genomic.fna.faa	GCA_005239425.1	Stenosarchaea group	Halobacteria	Eukyarchaea	100	50	0	25	100	100	0	0	0	0	0
GCA_000517625.1_ASM51762v1_genomic.fna.faa	GCA_000517625.1	Stenosarchaea group	Halobacteria	Eukyarchaea	100	66.7	0	12.5	100	100	0	0	0	0	0
GCA_013456555.2_ASM1345655v2_genomic.fna.faa	GCA_013456555.2	Stenosarchaea group	Halobacteria	Eukyarchaea	100	66.7	0	25	100	100	0	0	0	0	0
GCA_003022085.1_ASM302208v1_genomic.fna.faa	GCA_003022085.1	Stenosarchaea group	Halobacteria	Eukyarchaea	60	33.3	0	25	100	100	0	0	0	0	0
GCA_000383975.1_ASM38397v1_genomic.fna.faa	GCA_000383975.1	Stenosarchaea group	Halobacteria	Eukyarchaea	100	50	0	37.5	100	100	0	0	0	0	0
GCA_003021045.1_ASM302104v1_genomic.fna.faa	GCA_003021045.1	Stenosarchaea group	Halobacteria	Eukyarchaea	100	50	0	25	100	100	0	0	0	0	0
GCA_003058365.1_ASM305836v1_genomic.fna.faa	GCA_003058365.1	Stenosarchaea group	Halobacteria	Eukyarchaea	100	50	0	12.5	100	100	0	0	0	0	0
GCA_000217715.1_ASM21771v1_genomic.fna.faa	GCA_000217715.1	Stenosarchaea group	Halobacteria	Eukyarchaea	100	66.7	0	37.5	100	100	0	0	0	0	0
GCA_003856835.1_ASM385683v1_genomic.fna.faa	GCA_003856835.1	Stenosarchaea group	Halobacteria	Eukyarchaea	100	50	0	25	100	100	0	0	0	0	0
GCA_011440255.1_ASM1144025v1_genomic.fna.faa	GCA_011440255.1	Stenosarchaea group	Halobacteria	Eukyarchaea	100	66.7	0	25	100	100	0	0	0	0	0
GCA_013839425.1_ASM1383942v1_genomic.fna.faa	GCA_013839425.1	Stenosarchaea group	Halobacteria	Eukyarchaea	100	50	0	12.5	100	100	0	0	0	0	0
GCA_003675875.1_ASM367587v1_genomic.fna.faa	GCA_003675875.1	Stenosarchaea group	Halobacteria	Eukyarchaea	100	66.7	0	25	100	100	0	0	0	0	0
GCA_024266705.1_ASM2426670v1_genomic.fna.faa	GCA_024266705.1	Stenosarchaea group	Halobacteria	Eukyarchaea	100	66.7	0	37.5	100	100	0	0	0	0	0
GCA_011602445.1_ASM1160244v1_genomic.fna.faa	GCA_011602445.1	Stenosarchaea group	Halobacteria	Eukyarchaea	100	66.7	0	25	100	100	0	0	100	0	0
GCA_011440375.1_ASM1144037v1_genomic.fna.faa	GCA_011440375.1	Stenosarchaea group	Halobacteria	Eukyarchaea	100	50	0	25	100	100	0	0	0	0	0
GCA_000415965.1_J07B_scf56329a_trim_genomic.fna.faa	GCA_000415965.1	Stenosarchaea group	Halobacteria	Eukyarchaea	100	66.7	0	25	100	100	0	0	0	0	0
GCA_020217425.1_ASM2021742v1_genomic.fna.faa	GCA_020217425.1	Stenosarchaea group	Halobacteria	Eukyarchaea	100	66.7	0	25	100	100	0	0	0	0	0
GCA_014646875.1_ASM1464687v1_genomic.fna.faa	GCA_014646875.1	Stenosarchaea group	Halobacteria	Eukyarchaea	100	50	0	12.5	100	100	0	0	0	0	0
GCA_020405185.1_ASM2040518v1_genomic.fna.faa	GCA_020405185.1	Stenosarchaea group	Halobacteria	Eukyarchaea	100	66.7	0	12.5	100	100	0	0	0	0	0
GCA_003023455.1_ASM302345v1_genomic.fna.faa	GCA_003023455.1	Stenosarchaea group	Halobacteria	Eukyarchaea	60	50	0	0	100	100	0	0	0	0	0
GCA_023703775.1_ASM2370377v1_genomic.fna.faa	GCA_023703775.1	Stenosarchaea group	Halobacteria	Eukyarchaea	100	50	0	25	100	100	0	0	0	0	0
GCA_023638055.1_ASM2363805v1_genomic.fna.faa	GCA_023638055.1	Stenosarchaea group	Halobacteria	Eukyarchaea	100	66.7	0	12.5	100	100	0	0	0	0	0
GCA_021503995.1_ASM2150399v1_genomic.fna.faa	GCA_021503995.1	Stenosarchaea group	Halobacteria	Eukyarchaea	100	50	0	25	100	100	0	0	0	0	0
GCA_023008565.1_ASM2300856v1_genomic.fna.faa	GCA_023008565.1	Stenosarchaea group	Halobacteria	Eukyarchaea	100	66.7	0	25	100	100	0	0	0	0	0
GCA_007421925.1_ASM742192v1_genomic.fna.faa	GCA_007421925.1	Stenosarchaea group	Halobacteria	Eukyarchaea	100	66.7	0	25	100	100	0	0	0	0	0
GCA_021249405.1_ASM2124940v1_genomic.fna.faa	GCA_021249405.1	Stenosarchaea group	Halobacteria	Eukyarchaea	100	66.7	0	25	100	100	0	0	0	0	0
GCA_003022685.1_ASM302268v1_genomic.fna.faa	GCA_003022685.1	Stenosarchaea group	Halobacteria	Eukyarchaea	100	50	0	25	100	100	0	0	0	0	0
GCA_003586325.1_ASM358632v1_genomic.fna.faa	GCA_003586325.1	Stenosarchaea group	Halobacteria	Eukyarchaea	100	66.7	0	12.5	100	100	0	0	0	0	0
GCA_021249345.1_ASM2124934v1_genomic.fna.faa	GCA_021249345.1	Stenosarchaea group	Halobacteria	Eukyarchaea	100	50	0	25	100	100	0	0	0	0	0
GCA_010692885.1_ASM1069288v1_genomic.fna.faa	GCA_010692885.1	Stenosarchaea group	Halobacteria	Eukyarchaea	100	66.7	0	25	100	100	0	0	0	0	0
GCA_003721435.2_ASM372143v2_genomic.fna.faa	GCA_003721435.2	Stenosarchaea group	Halobacteria	Eukyarchaea	100	50	0	25	100	100	0	0	0	0	0
GCA_000427685.1_ASM42768v1_genomic.fna.faa	GCA_000427685.1	Stenosarchaea group	Halobacteria	Eukyarchaea	100	50	0	25	100	100	0	0	0	0	0
GCA_000416045.1_HR_032012_genomic.fna.faa	GCA_000416045.1	Stenosarchaea group	Halobacteria	Eukyarchaea	100	50	0	0	0	100	0	0	0	0	0
GCA_005406325.1_ASM540632v1_genomic.fna.faa	GCA_005406325.1	Stenosarchaea group	Halobacteria	Eukyarchaea	100	66.7	0	25	100	100	0	0	0	0	0
GCA_024228675.1_ASM2422867v1_genomic.fna.faa	GCA_024228675.1	Stenosarchaea group	Halobacteria	Eukyarchaea	100	50	0	25	100	100	0	0	0	0	0
GCA_900003515.1_ASM90000351v1_genomic.fna.faa	GCA_900003515.1	Stenosarchaea group	Halobacteria	Eukyarchaea	100	50	0	12.5	100	100	0	0	0	0	0
GCA_900005775.1_ASM90000577v1_genomic.fna.faa	GCA_900005775.1	Stenosarchaea group	Halobacteria	Eukyarchaea	100	50	0	12.5	100	100	0	0	0	0	0
GCA_003022005.1_ASM302200v1_genomic.fna.faa	GCA_003022005.1	Stenosarchaea group	Halobacteria	Eukyarchaea	100	50	0	25	100	100	0	0	0	0	0
GCA_900107205.1_IMG-taxon_2654587885_annotated_assembly_genomic.fna.faa	GCA_900107205.1	Stenosarchaea group	Halobacteria	Eukyarchaea	100	50	0	12.5	100	100	0	0	0	0	0
GCA_005435175.1_ASM543517v1_genomic.fna.faa	GCA_005435175.1	Stenosarchaea group	Halobacteria	Eukyarchaea	100	66.7	0	25	100	100	0	0	0	0	0
GCA_001647155.1_ASM164715v1_genomic.fna.faa	GCA_001647155.1	Stenosarchaea group	Halobacteria	Eukyarchaea	100	50	0	25	100	100	0	0	0	0	0
GCA_003023485.1_ASM302348v1_genomic.fna.faa	GCA_003023485.1	Stenosarchaea group	Halobacteria	Eukyarchaea	80	50	0	12.5	100	100	0	0	0	0	0
GCA_900103505.1_IMG-taxon_2651870127_annotated_assembly_genomic.fna.faa	GCA_900103505.1	Stenosarchaea group	Halobacteria	Eukyarchaea	100	50	0	12.5	100	100	0	0	0	0	0
GCA_003023785.1_ASM302378v1_genomic.fna.faa	GCA_003023785.1	Stenosarchaea group	Halobacteria	Eukyarchaea	100	50	0	12.5	100	100	0	0	0	0	0
GCA_003430825.1_ASM343082v1_genomic.fna.faa	GCA_003430825.1	Stenosarchaea group	Halobacteria	Eukyarchaea	100	66.7	0	37.5	100	100	0	0	0	0	0
GCA_900110865.1_IMG-taxon_2639762573_annotated_assembly_genomic.fna.faa	GCA_900110865.1	Stenosarchaea group	Halobacteria	Eukyarchaea	100	66.7	0	37.5	100	100	0	0	0	0	0
GCA_013415905.1_ASM1341590v1_genomic.fna.faa	GCA_013415905.1	Stenosarchaea group	Halobacteria	Eukyarchaea	100	50	0	37.5	100	100	0	0	0	0	0
GCA_003023575.1_ASM302357v1_genomic.fna.faa	GCA_003023575.1	Stenosarchaea group	Halobacteria	Eukyarchaea	60	50	0	12.5	100	100	0	0	0	0	0
GCA_002252955.1_ASM225295v1_genomic.fna.faa	GCA_002252955.1	Stenosarchaea group	Halobacteria	Eukyarchaea	100	50	0	25	100	100	0	0	0	0	0
GCA_007833275.1_ASM783327v1_genomic.fna.faa	GCA_007833275.1	Stenosarchaea group	Halobacteria	Eukyarchaea	100	50	0	25	100	100	0	0	0	0	0
GCA_024218795.1_ASM2421879v1_genomic.fna.faa	GCA_024218795.1	Stenosarchaea group	Halobacteria	Eukyarchaea	100	50	0	12.5	100	100	0	0	0	0	0
GCA_003021205.1_ASM302120v1_genomic.fna.faa	GCA_003021205.1	Stenosarchaea group	Halobacteria	Eukyarchaea	80	33.3	0	25	100	100	0	0	0	0	0
GCA_004799645.1_ASM479964v1_genomic.fna.faa	GCA_004799645.1	Stenosarchaea group	Halobacteria	Eukyarchaea	100	50	0	37.5	100	100	0	0	0	0	0
GCA_000379085.1_ASM37908v1_genomic.fna.faa	GCA_000379085.1	Stenosarchaea group	Halobacteria	Eukyarchaea	100	50	0	25	100	100	0	0	0	0	0
GCA_003021655.1_ASM302165v1_genomic.fna.faa	GCA_003021655.1	Stenosarchaea group	Halobacteria	Eukyarchaea	100	50	0	12.5	100	100	0	0	0	0	0
GCA_005576615.1_ASM557661v1_genomic.fna.faa	GCA_005576615.1	Stenosarchaea group	Halobacteria	Eukyarchaea	100	66.7	0	37.5	100	100	0	0	0	0	0
GCA_017612575.1_ASM1761257v1_genomic.fna.faa	GCA_017612575.1	Stenosarchaea group	Halobacteria	Eukyarchaea	100	50	0	25	100	100	0	0	50	0	0
GCA_003021235.1_ASM302123v1_genomic.fna.faa	GCA_003021235.1	Stenosarchaea group	Halobacteria	Eukyarchaea	100	50	0	12.5	100	100	0	0	0	0	0
GCA_001767315.1_ASM176731v1_genomic.fna.faa	GCA_001767315.1	Stenosarchaea group	Halobacteria	Eukyarchaea	100	66.7	0	12.5	100	100	0	0	0	0	0
GCA_003021105.1_ASM302110v1_genomic.fna.faa	GCA_003021105.1	Stenosarchaea group	Halobacteria	Eukyarchaea	100	33.3	0	25	100	100	0	0	0	0	0
GCA_023008545.1_ASM2300854v1_genomic.fna.faa	GCA_023008545.1	Stenosarchaea group	Halobacteria	Eukyarchaea	100	66.7	0	25	100	100	0	0	0	0	0
GCA_023702125.1_ASM2370212v1_genomic.fna.faa	GCA_023702125.1	Stenosarchaea group	Halobacteria	Eukyarchaea	100	50	0	12.5	100	100	0	0	0	0	0
GCA_003021175.1_ASM302117v1_genomic.fna.faa	GCA_003021175.1	Stenosarchaea group	Halobacteria	Eukyarchaea	100	66.7	0	12.5	100	100	0	0	0	0	0
GCA_000447865.2_ASM44786v2_genomic.fna.faa	GCA_000447865.2	Stenosarchaea group	Halobacteria	Eukyarchaea	100	50	0	0	100	100	0	0	0	0	0
GCA_013330985.1_ASM1333098v1_genomic.fna.faa	GCA_013330985.1	Stenosarchaea group	Halobacteria	Eukyarchaea	100	50	0	0	100	100	0	0	0	0	0
GCA_002841675.1_ASM284167v1_genomic.fna.faa	GCA_002841675.1	unclassified Euryarchaeota	Huberarchaeia	DPANN	0	16.7	0	0	100	0	0	0	0	0	0
GCA_002790315.1_ASM279031v1_genomic	GCA_002790315.1	Candidatus Huberarchaea	Huberarchaeia	DPANN	0	0	0	0	100	0	0	0	0	0	0
GCA_002780965.1_ASM278096v1_genomic	GCA_002780965.1	Candidatus Huberarchaea	Huberarchaeia	DPANN	0	0	0	0	100	0	0	0	0	0	0
GCA_002789275.1_ASM278927v1_genomic	GCA_002789275.1	Candidatus Huberarchaea	Huberarchaeia	DPANN	0	0	0	0	0	0	0	0	0	0	0
GCA_013152845.1_ASM1315284v1_genomic.fna.faa	GCA_013152845.1	unclassified Euryarchaeota	Hydrothermarchaeia	Eukyarchaea	60	50	0	12.5	100	0	0	0	0	0	0
GCA_003229935.1_ASM322993v1_genomic.fna.faa	GCA_003229935.1	unclassified Euryarchaeota	Hydrothermarchaeia	Eukyarchaea	60	50	0	12.5	100	0	0	0	0	0	0
GCA_013152995.1_ASM1315299v1_genomic.fna.faa	GCA_013152995.1	unclassified Euryarchaeota	Hydrothermarchaeia	Eukyarchaea	60	50	0	12.5	100	0	0	0	0	0	0
GCA_013152685.1_ASM1315268v1_genomic.fna.faa	GCA_013152685.1	unclassified Euryarchaeota	Hydrothermarchaeia	Eukyarchaea	60	50	0	12.5	100	0	0	0	0	0	0
GCA_016187745.1_ASM1618774v1_genomic	GCA_016187745.1	Candidatus Diapherotrites	Iainarchaeia	DPANN	60	0	0	12.5	0	0	0	0	0	0	0
GCA_017609985.1_ASM1760998v1_genomic	GCA_017609985.1	Candidatus Diapherotrites	Iainarchaeia	DPANN	60	50	0	12.5	100	0	0	0	0	0	0
GCA_002793375.1_ASM279337v1_genomic	GCA_002793375.1	Candidatus Diapherotrites	Iainarchaeia	DPANN	20	16.7	0	100	100	0	100	0	0	0	0
GCA_016186855.1_ASM1618685v1_genomic	GCA_016186855.1	Candidatus Diapherotrites	Iainarchaeia	DPANN	20	33.3	0	12.5	100	100	0	0	50	0	0
GCA_013331725.1_ASM1333172v1_genomic	GCA_013331725.1	Candidatus Diapherotrites	Iainarchaeia	DPANN	60	66.7	0	0	100	0	0	0	0	0	0
GCA_002499505.1_ASM249950v1_genomic	GCA_002499505.1	Candidatus Diapherotrites	Iainarchaeia	DPANN	0	33.3	0	12.5	0	0	0	0	0	0	0
GCA_018304485.1_ASM1830448v1_genomic	GCA_018304485.1	Candidatus Diapherotrites	Iainarchaeia	DPANN	80	16.7	0	0	100	0	0	0	50	0	0
GCA_018304495.1_ASM1830449v1_genomic	GCA_018304495.1	Candidatus Diapherotrites	Iainarchaeia	DPANN	20	50	0	12.5	100	0	0	0	100	0	0
GCA_017608645.1_ASM1760864v1_genomic	GCA_017608645.1	Candidatus Diapherotrites	Iainarchaeia	DPANN	80	16.7	0	0	100	0	0	0	0	0	0
GCA_017608575.1_ASM1760857v1_genomic	GCA_017608575.1	Candidatus Diapherotrites	Iainarchaeia	DPANN	60	50	0	12.5	100	0	0	0	0	0	0
GCA_002762975.1_ASM276297v1_genomic	GCA_002762975.1	Candidatus Diapherotrites	Iainarchaeia	DPANN	100	66.7	0	25	100	0	0	0	0	0	0
GCA_017608725.1_ASM1760872v1_genomic	GCA_017608725.1	Candidatus Diapherotrites	Iainarchaeia	DPANN	60	66.7	0	25	100	0	0	0	100	0	0
GCA_017608805.1_ASM1760880v1_genomic	GCA_017608805.1	Candidatus Diapherotrites	Iainarchaeia	DPANN	80	50	0	25	100	0	0	0	0	0	0
GCA_017607905.1_ASM1760790v1_genomic	GCA_017607905.1	Candidatus Diapherotrites	Iainarchaeia	DPANN	60	50	0	12.5	100	0	0	0	0	0	0
GCA_017609945.1_ASM1760994v1_genomic	GCA_017609945.1	Candidatus Diapherotrites	Iainarchaeia	DPANN	20	0	0	25	100	0	0	0	0	0	0
GCA_013331455.1_ASM1333145v1_genomic	GCA_013331455.1	Candidatus Diapherotrites	Iainarchaeia	DPANN	40	66.7	0	25	100	0	0	0	0	0	0
GCA_016699555.1_ASM1669955v1_genomic	GCA_016699555.1	Candidatus Diapherotrites	Iainarchaeia	DPANN	20	33.3	0	100	100	100	0	0	0	0	0
GCA_013332025.1_ASM1333202v1_genomic	GCA_013332025.1	Candidatus Diapherotrites	Iainarchaeia	DPANN	80	66.7	0	12.5	100	0	0	0	100	0	0
GCA_017609365.1_ASM1760936v1_genomic	GCA_017609365.1	Candidatus Diapherotrites	Iainarchaeia	DPANN	80	50	0	12.5	100	0	0	0	0	0	0
GCA_002779075.1_ASM277907v1_genomic	GCA_002779075.1	Candidatus Diapherotrites	Iainarchaeia	DPANN	0	0	0	12.5	0	0	0	0	0	0	0
GCA_002779065.1_ASM277906v1_genomic	GCA_002779065.1	Candidatus Diapherotrites	Iainarchaeia	DPANN	60	50	0	25	100	0	0	0	0	33.3	0
GCA_017608995.1_ASM1760899v1_genomic	GCA_017608995.1	Candidatus Diapherotrites	Iainarchaeia	DPANN	80	50	0	12.5	100	0	0	0	0	0	0
GCA_017608775.1_ASM1760877v1_genomic	GCA_017608775.1	Candidatus Diapherotrites	Iainarchaeia	DPANN	0	0	0	12.5	100	0	0	0	0	0	0
GCA_002763225.1_ASM276322v1_genomic	GCA_002763225.1	Candidatus Diapherotrites	Iainarchaeia	DPANN	20	33.3	0	100	100	100	100	0	0	0	0
GCA_017610245.1_ASM1761024v1_genomic	GCA_017610245.1	Candidatus Diapherotrites	Iainarchaeia	DPANN	40	50	0	12.5	100	0	0	0	50	0	0
GCA_002778895.1_ASM277889v1_genomic	GCA_002778895.1	Candidatus Diapherotrites	Iainarchaeia	DPANN	0	0	0	0	0	0	0	0	0	0	0
GCA_017610205.1_ASM1761020v1_genomic	GCA_017610205.1	Candidatus Diapherotrites	Iainarchaeia	DPANN	80	50	0	12.5	100	0	0	0	100	0	0
GCA_013331925.1_ASM1333192v1_genomic	GCA_013331925.1	Candidatus Diapherotrites	Iainarchaeia	DPANN	60	66.7	0	0	100	0	0	0	0	0	0
GCA_002781385.1_ASM278138v1_genomic.fna.faa	GCA_002781385.1	unclassified Euryarchaeota	JAKEGO01	Eukyarchaea	60	50	0	12.5	0	0	0	0	100	0	0
GCA_011776705.1_ASM1177670v1_genomic	GCA_011776705.1	Candidatus Korarchaeota	JANJXX01	TACK	80	50	0	0	100	100	0	0	100	33.3	0
GCA_011774645.1_ASM1177464v1_genomic	GCA_011774645.1	Candidatus Korarchaeota	JANJXX01	TACK	80	50	0	37.5	100	100	0	0	100	33.3	0
GCA_000019605.1_ASM1960v1_genomic	GCA_000019605.1	Candidatus Korarchaeota	Korarchaeia	TACK	100	50	0	12.5	100	0	100	0	0	0	0
GCA_003947435.1_ASM394743v1_genomic	GCA_003947435.1	Candidatus Korarchaeota	Korarchaeia	TACK	80	50	0	25	100	0	0	0	0	33.3	0
GCA_902764455.1_Rumen_uncultured_genome_RUG10962_genomic.fna.faa	GCA_902764455.1	Methanomada group	Methanobacteria	Eukyarchaea	80	50	0	25	100	0	0	0	0	0	0
GCA_002495445.1_ASM249544v1_genomic.fna.faa	GCA_002495445.1	Methanomada group	Methanobacteria	Eukyarchaea	60	50	0	12.5	100	0	0	0	50	33.3	0
GCA_003158115.1_20120600_S2D_genomic.fna.faa	GCA_003158115.1	Methanomada group	Methanobacteria	Eukyarchaea	80	50	0	12.5	100	0	100	0	0	0	0
GCA_015062915.1_ASM1506291v1_genomic.fna.faa	GCA_015062915.1	Methanomada group	Methanobacteria	Eukyarchaea	80	50	0	25	100	0	0	0	0	0	0
GCA_902777105.1_Rumen_uncultured_genome_RUG12237_genomic.fna.faa	GCA_902777105.1	Methanomada group	Methanobacteria	Eukyarchaea	60	50	0	25	100	0	0	0	0	0	0
GCA_902757685.1_Rumen_uncultured_genome_RUG10284_genomic.fna.faa	GCA_902757685.1	Methanomada group	Methanobacteria	Eukyarchaea	60	50	0	25	100	0	0	0	0	0	0
GCA_902798405.1_Rumen_uncultured_genome_RUG14366_genomic.fna.faa	GCA_902798405.1	Methanomada group	Methanobacteria	Eukyarchaea	80	50	0	12.5	100	0	0	0	0	0	0
GCA_000762265.1_ASM76226v1_genomic.fna.faa	GCA_000762265.1	Methanomada group	Methanobacteria	Eukyarchaea	80	50	0	25	100	0	0	0	50	0	0
GCA_902788255.1_Rumen_uncultured_genome_RUG13354_genomic.fna.faa	GCA_902788255.1	Methanomada group	Methanobacteria	Eukyarchaea	60	50	0	25	100	0	0	0	0	0	0
GCA_905234905.1_RUG30194_genomic.fna.faa	GCA_905234905.1	Methanomada group	Methanobacteria	Eukyarchaea	60	50	0	25	100	0	0	0	0	0	0
GCA_002498485.1_ASM249848v1_genomic.fna.faa	GCA_002498485.1	Methanomada group	Methanobacteria	Eukyarchaea	60	50	0	12.5	100	0	0	0	0	0	0
GCA_002497395.1_ASM249739v1_genomic.fna.faa	GCA_002497395.1	Methanomada group	Methanobacteria	Eukyarchaea	80	50	0	12.5	100	0	0	0	0	0	0
GCA_003168635.1_20110600_S3M_genomic.fna.faa	GCA_003168635.1	Methanomada group	Methanobacteria	Eukyarchaea	60	50	0	12.5	100	0	0	0	0	33.3	0
GCA_002509655.1_ASM250965v1_genomic.fna.faa	GCA_002509655.1	Methanomada group	Methanobacteria	Eukyarchaea	60	50	0	12.5	100	0	0	0	0	0	0
GCA_013329335.1_ASM1332933v1_genomic.fna.faa	GCA_013329335.1	Methanomada group	Methanobacteria	Eukyarchaea	60	50	0	12.5	100	0	0	0	0	0	0
GCA_002509645.1_ASM250964v1_genomic.fna.faa	GCA_002509645.1	Methanomada group	Methanobacteria	Eukyarchaea	60	50	0	12.5	100	0	0	0	0	0	0
GCA_002508935.1_ASM250893v1_genomic.fna.faa	GCA_002508935.1	Methanomada group	Methanobacteria	Eukyarchaea	60	50	0	12.5	100	0	0	0	0	0	0
GCA_021641085.1_ASM2164108v1_genomic.fna.faa	GCA_021641085.1	Methanomada group	Methanobacteria	Eukyarchaea	80	50	0	25	100	0	0	0	0	0	0
GCA_002495805.1_ASM249580v1_genomic.fna.faa	GCA_002495805.1	Methanomada group	Methanobacteria	Eukyarchaea	60	50	0	12.5	100	0	0	0	100	33.3	0
GCA_003138775.1_20110800_S2D_genomic.fna.faa	GCA_003138775.1	Methanomada group	Methanobacteria	Eukyarchaea	80	50	0	12.5	100	0	0	0	50	33.3	0
GCA_015062905.1_ASM1506290v1_genomic.fna.faa	GCA_015062905.1	Methanomada group	Methanobacteria	Eukyarchaea	60	50	0	25	100	0	0	0	0	0	0
GCA_022014235.1_ASM2201423v1_genomic.fna.faa	GCA_022014235.1	Methanomada group	Methanobacteria	Eukyarchaea	60	50	0	12.5	100	100	0	0	0	0	0
GCA_900317075.1_Rumen_uncultured_genome_RUG256_genomic.fna.faa	GCA_900317075.1	Methanomada group	Methanobacteria	Eukyarchaea	20	50	0	25	100	0	0	0	0	0	0
GCA_902765105.1_Rumen_uncultured_genome_RUG11035_genomic.fna.faa	GCA_902765105.1	Methanomada group	Methanobacteria	Eukyarchaea	80	50	0	12.5	100	0	0	0	0	0	0
GCA_902781365.1_Rumen_uncultured_genome_RUG12666_genomic.fna.faa	GCA_902781365.1	Methanomada group	Methanobacteria	Eukyarchaea	60	50	0	12.5	100	0	0	0	0	0	0
GCA_002839705.1_ASM283970v1_genomic.fna.faa	GCA_002839705.1	Methanomada group	Methanobacteria	Eukyarchaea	100	50	0	12.5	100	100	0	0	50	0	0
GCA_902784455.1_Rumen_uncultured_genome_RUG12982_genomic.fna.faa	GCA_902784455.1	Methanomada group	Methanobacteria	Eukyarchaea	60	50	0	25	100	0	0	0	0	0	0
GCA_014361305.1_ASM1436130v1_genomic.fna.faa	GCA_014361305.1	Methanomada group	Methanobacteria	Eukyarchaea	80	33.3	0	0	0	0	0	0	0	0	0
GCA_002505725.1_ASM250572v1_genomic.fna.faa	GCA_002505725.1	Methanomada group	Methanobacteria	Eukyarchaea	80	50	0	12.5	100	0	0	0	0	0	0
GCA_003266175.1_ASM326617v1_genomic.fna.faa	GCA_003266175.1	Methanomada group	Methanobacteria	Eukyarchaea	80	50	0	25	100	0	0	0	0	0	0
GCA_002813085.1_ASM281308v1_genomic.fna.faa	GCA_002813085.1	Methanomada group	Methanobacteria	Eukyarchaea	80	50	0	25	100	0	0	0	0	0	0
GCA_902763935.1_Rumen_uncultured_genome_RUG10917_genomic.fna.faa	GCA_902763935.1	Methanomada group	Methanobacteria	Eukyarchaea	80	50	0	12.5	100	0	0	0	0	0	0
GCA_002509625.1_ASM250962v1_genomic.fna.faa	GCA_002509625.1	Methanomada group	Methanobacteria	Eukyarchaea	60	50	0	12.5	100	0	0	0	0	0	0
GCA_002504585.1_ASM250458v1_genomic.fna.faa	GCA_002504585.1	Methanomada group	Methanobacteria	Eukyarchaea	60	50	0	12.5	100	0	0	0	100	33.3	0
GCA_022839825.1_ASM2283982v1_genomic.fna.faa	GCA_022839825.1	Methanomada group	Methanobacteria	Eukyarchaea	60	50	0	12.5	100	0	0	0	50	33.3	0
GCA_022846155.1_ASM2284615v1_genomic.fna.faa	GCA_022846155.1	Methanomada group	Methanobacteria	Eukyarchaea	80	50	0	25	100	0	0	0	0	0	0
GCA_003158635.1_20120600_E2D_genomic.fna.faa	GCA_003158635.1	Methanomada group	Methanobacteria	Eukyarchaea	40	50	0	25	100	0	0	0	50	33.3	0
GCA_003385755.1_ASM338575v1_genomic.fna.faa	GCA_003385755.1	Methanomada group	Methanobacteria	Eukyarchaea	80	50	0	12.5	100	100	0	0	0	0	0
GCA_002509725.1_ASM250972v1_genomic.fna.faa	GCA_002509725.1	Methanomada group	Methanobacteria	Eukyarchaea	60	50	0	0	0	0	0	0	0	0	0
GCA_002509705.1_ASM250970v1_genomic.fna.faa	GCA_002509705.1	Methanomada group	Methanobacteria	Eukyarchaea	80	50	0	12.5	100	0	0	0	0	0	0
GCA_018263135.1_ASM1826313v1_genomic.fna.faa	GCA_018263135.1	Methanomada group	Methanobacteria	Eukyarchaea	80	50	0	12.5	0	0	0	0	50	33.3	0
GCA_902786715.1_Rumen_uncultured_genome_RUG13199_genomic.fna.faa	GCA_902786715.1	Methanomada group	Methanobacteria	Eukyarchaea	60	33.3	0	25	0	0	0	0	0	0	0
GCA_902778345.1_Rumen_uncultured_genome_RUG12365_genomic.fna.faa	GCA_902778345.1	Methanomada group	Methanobacteria	Eukyarchaea	20	50	0	25	100	0	0	0	0	0	0
GCA_902789165.1_Rumen_uncultured_genome_RUG13441_genomic.fna.faa	GCA_902789165.1	Methanomada group	Methanobacteria	Eukyarchaea	40	50	0	25	100	0	0	0	0	0	0
GCA_902384055.1_UHGG_MGYG-HGUT-02163_genomic.fna.faa	GCA_902384055.1	Methanomada group	Methanobacteria	Eukyarchaea	80	50	0	25	100	0	0	0	0	0	0
GCA_018141185.1_ASM1814118v1_genomic.fna.faa	GCA_018141185.1	Methanomada group	Methanobacteria	Eukyarchaea	100	50	0	12.5	100	100	0	0	50	0	0
GCA_013331465.1_ASM1333146v1_genomic.fna.faa	GCA_013331465.1	Methanomada group	Methanobacteria	Eukyarchaea	60	50	0	12.5	0	0	0	0	0	0	0
GCA_000166095.1_ASM16609v1_genomic.fna.faa	GCA_000166095.1	Methanomada group	Methanobacteria	Eukyarchaea	80	50	0	12.5	100	0	0	0	0	0	0
GCA_902774605.1_Rumen_uncultured_genome_RUG11987_genomic.fna.faa	GCA_902774605.1	Methanomada group	Methanobacteria	Eukyarchaea	20	50	0	25	100	0	0	0	0	0	0
GCA_002509605.1_ASM250960v1_genomic.fna.faa	GCA_002509605.1	Methanomada group	Methanobacteria	Eukyarchaea	80	33.3	0	12.5	100	0	0	0	0	0	0
GCA_001548675.1_ASM154867v1_genomic.fna.faa	GCA_001548675.1	Methanomada group	Methanobacteria	Eukyarchaea	60	50	0	25	100	0	0	0	0	33.3	0
GCA_902770085.1_Rumen_uncultured_genome_RUG11531_genomic.fna.faa	GCA_902770085.1	Methanomada group	Methanobacteria	Eukyarchaea	80	50	0	12.5	100	0	0	0	0	0	0
GCA_022837835.1_ASM2283783v1_genomic.fna.faa	GCA_022837835.1	Methanomada group	Methanobacteria	Eukyarchaea	80	50	0	12.5	100	0	0	0	50	33.3	0
GCA_900314635.1_Rumen_uncultured_genome_RUG020_genomic.fna.faa	GCA_900314635.1	Methanomada group	Methanobacteria	Eukyarchaea	60	50	0	12.5	100	0	0	0	0	0	0
GCA_902762085.1_Rumen_uncultured_genome_RUG10738_genomic.fna.faa	GCA_902762085.1	Methanomada group	Methanobacteria	Eukyarchaea	60	50	0	12.5	100	0	0	0	0	0	0
GCA_902790605.1_Rumen_uncultured_genome_RUG13586_genomic.fna.faa	GCA_902790605.1	Methanomada group	Methanobacteria	Eukyarchaea	80	50	0	0	100	0	0	0	0	0	0
GCA_003141035.1_20120800_S1D_genomic.fna.faa	GCA_003141035.1	Methanomada group	Methanobacteria	Eukyarchaea	80	50	0	12.5	100	0	0	0	0	0	0
GCA_013330915.1_ASM1333091v1_genomic.fna.faa	GCA_013330915.1	Methanomada group	Methanobacteria	Eukyarchaea	60	50	0	12.5	100	0	0	0	0	0	0
GCA_902775005.1_Rumen_uncultured_genome_RUG12025_genomic.fna.faa	GCA_902775005.1	Methanomada group	Methanobacteria	Eukyarchaea	60	50	0	12.5	100	0	0	0	0	33.3	0
GCA_900313245.1_Rumen_uncultured_genome_RUG780_genomic.fna.faa	GCA_900313245.1	Methanomada group	Methanobacteria	Eukyarchaea	80	50	0	12.5	100	0	0	0	0	0	0
GCA_000012545.1_ASM1254v1_genomic.fna.faa	GCA_000012545.1	Methanomada group	Methanobacteria	Eukyarchaea	60	50	0	12.5	100	0	0	0	0	0	0
GCA_002839685.1_ASM283968v1_genomic.fna.faa	GCA_002839685.1	Methanomada group	Methanobacteria	Eukyarchaea	80	50	0	12.5	100	0	100	0	50	0	0
GCA_003153815.1_20120700_E3M_genomic.fna.faa	GCA_003153815.1	Methanomada group	Methanobacteria	Eukyarchaea	60	33.3	0	25	100	0	100	0	0	0	0
GCA_902759165.1_Rumen_uncultured_genome_RUG10434_genomic.fna.faa	GCA_902759165.1	Methanomada group	Methanobacteria	Eukyarchaea	80	50	0	12.5	100	0	0	0	0	0	0
GCA_002505925.1_ASM250592v1_genomic.fna.faa	GCA_002505925.1	Methanomada group	Methanobacteria	Eukyarchaea	80	50	0	12.5	100	0	0	0	0	0	0
GCA_002505895.1_ASM250589v1_genomic.fna.faa	GCA_002505895.1	Methanomada group	Methanobacteria	Eukyarchaea	80	50	0	12.5	100	0	0	0	0	0	0
GCA_902769175.1_Rumen_uncultured_genome_RUG11428_genomic.fna.faa	GCA_902769175.1	Methanomada group	Methanobacteria	Eukyarchaea	80	50	0	12.5	100	0	0	0	0	0	0
GCA_000145295.1_ASM14529v1_genomic.fna.faa	GCA_000145295.1	Methanomada group	Methanobacteria	Eukyarchaea	80	50	0	12.5	100	100	0	0	0	0	0
GCA_002495365.1_ASM249536v1_genomic.fna.faa	GCA_002495365.1	Methanomada group	Methanobacteria	Eukyarchaea	80	50	0	12.5	100	0	0	0	0	0	0
GCA_002508825.1_ASM250882v1_genomic.fna.faa	GCA_002508825.1	Methanomada group	Methanobacteria	Eukyarchaea	60	50	0	12.5	100	0	0	0	0	0	0
GCA_002497105.1_ASM249710v1_genomic.fna.faa	GCA_002497105.1	Methanomada group	Methanobacteria	Eukyarchaea	60	50	0	12.5	100	0	0	0	100	33.3	0
GCA_902759335.1_Rumen_uncultured_genome_RUG10447_genomic.fna.faa	GCA_902759335.1	Methanomada group	Methanobacteria	Eukyarchaea	80	50	0	0	100	0	0	0	0	0	0
GCA_002508925.1_ASM250892v1_genomic.fna.faa	GCA_002508925.1	Methanomada group	Methanobacteria	Eukyarchaea	60	50	0	12.5	100	0	0	0	0	0	0
GCA_002503345.1_ASM250334v1_genomic.fna.faa	GCA_002503345.1	Methanomada group	Methanobacteria	Eukyarchaea	80	33.3	0	12.5	0	0	100	0	50	0	0
GCA_002499145.1_ASM249914v1_genomic.fna.faa	GCA_002499145.1	Methanomada group	Methanobacteria	Eukyarchaea	60	50	0	12.5	100	0	0	0	50	33.3	0
GCA_905235185.1_RUG30205_genomic.fna.faa	GCA_905235185.1	Methanomada group	Methanobacteria	Eukyarchaea	80	50	0	12.5	100	0	0	0	0	0	0
GCA_900320955.1_Rumen_uncultured_genome_RUG648_genomic.fna.faa	GCA_900320955.1	Methanomada group	Methanobacteria	Eukyarchaea	60	50	0	12.5	100	0	0	0	0	0	0
GCA_024167805.1_ASM2416780v1_genomic.fna.faa	GCA_024167805.1	Methanomada group	Methanobacteria	Eukyarchaea	80	50	0	25	100	0	0	0	0	0	0
GCA_005924185.1_ASM592418v1_genomic.fna.faa	GCA_005924185.1	Methanomada group	Methanobacteria	Eukyarchaea	60	50	0	12.5	100	0	0	0	100	33.3	0
GCA_902758195.1_Rumen_uncultured_genome_RUG10339_genomic.fna.faa	GCA_902758195.1	Methanomada group	Methanobacteria	Eukyarchaea	40	50	0	25	100	0	0	0	0	0	0
GCA_902770905.1_Rumen_uncultured_genome_RUG11608_genomic.fna.faa	GCA_902770905.1	Methanomada group	Methanobacteria	Eukyarchaea	20	50	0	25	100	0	0	0	0	0	0
GCA_902798395.1_Rumen_uncultured_genome_RUG14364_genomic.fna.faa	GCA_902798395.1	Methanomada group	Methanobacteria	Eukyarchaea	80	50	0	0	100	0	0	0	0	0	0
GCA_900315685.1_Rumen_uncultured_genome_RUG121_genomic.fna.faa	GCA_900315685.1	Methanomada group	Methanobacteria	Eukyarchaea	80	50	0	0	100	0	0	0	0	0	0
GCA_902780425.1_Rumen_uncultured_genome_RUG12567_genomic.fna.faa	GCA_902780425.1	Methanomada group	Methanobacteria	Eukyarchaea	60	50	0	12.5	100	0	0	0	0	33.3	0
GCA_902802295.1_Rumen_uncultured_genome_RUG14756_genomic.fna.faa	GCA_902802295.1	Methanomada group	Methanobacteria	Eukyarchaea	60	50	0	37.5	100	0	0	0	0	0	0
GCA_902775675.1_Rumen_uncultured_genome_RUG12086_genomic.fna.faa	GCA_902775675.1	Methanomada group	Methanobacteria	Eukyarchaea	60	50	0	25	100	0	0	0	0	0	0
GCA_902800375.1_Rumen_uncultured_genome_RUG14563_genomic.fna.faa	GCA_902800375.1	Methanomada group	Methanobacteria	Eukyarchaea	20	50	0	12.5	100	0	0	0	0	0	0
GCA_902762445.1_Rumen_uncultured_genome_RUG10759_genomic.fna.faa	GCA_902762445.1	Methanomada group	Methanobacteria	Eukyarchaea	60	50	0	25	100	0	0	0	0	0	0
GCA_003265405.1_ASM326540v1_genomic.fna.faa	GCA_003265405.1	Methanomada group	Methanobacteria	Eukyarchaea	60	50	0	12.5	100	0	0	0	0	0	0
GCA_002508855.1_ASM250885v1_genomic.fna.faa	GCA_002508855.1	Methanomada group	Methanobacteria	Eukyarchaea	60	50	0	12.5	100	0	0	0	0	0	0
GCA_000016525.1_ASM1652v1_genomic.fna.faa	GCA_000016525.1	Methanomada group	Methanobacteria	Eukyarchaea	80	50	0	25	100	0	0	0	0	0	0
GCA_003134315.1_20111000_S2D_genomic.fna.faa	GCA_003134315.1	Methanomada group	Methanobacteria	Eukyarchaea	80	50	0	12.5	100	0	100	0	0	0	0
GCA_902755425.1_Rumen_uncultured_genome_RUG10064_genomic.fna.faa	GCA_902755425.1	Methanomada group	Methanobacteria	Eukyarchaea	60	33.3	0	12.5	100	0	0	0	0	0	0
GCA_002508885.1_ASM250888v1_genomic.fna.faa	GCA_002508885.1	Methanomada group	Methanobacteria	Eukyarchaea	60	50	0	12.5	100	0	0	0	0	0	0
GCA_902777885.1_Rumen_uncultured_genome_RUG12316_genomic.fna.faa	GCA_902777885.1	Methanomada group	Methanobacteria	Eukyarchaea	20	50	0	25	100	0	0	0	0	0	0
GCA_015062825.1_ASM1506282v1_genomic.fna.faa	GCA_015062825.1	Methanomada group	Methanobacteria	Eukyarchaea	80	50	0	12.5	100	0	0	0	0	0	0
GCA_022837385.1_ASM2283738v1_genomic.fna.faa	GCA_022837385.1	Methanomada group	Methanobacteria	Eukyarchaea	80	50	0	25	100	0	0	0	50	33.3	0
GCA_002503005.1_ASM250300v1_genomic.fna.faa	GCA_002503005.1	Methanomada group	Methanobacteria	Eukyarchaea	80	50	0	25	0	0	0	0	0	0	0
GCA_002356395.1_ASM235639v1_genomic.fna.faa	GCA_002356395.1	Methanomada group	Methanobacteria	Eukyarchaea	80	50	0	12.5	100	100	0	0	0	0	0
GCA_902776255.1_Rumen_uncultured_genome_RUG12155_genomic.fna.faa	GCA_902776255.1	Methanomada group	Methanobacteria	Eukyarchaea	60	50	0	12.5	100	0	0	0	0	0	0
GCA_003814835.1_ASM381483v1_genomic.fna.faa	GCA_003814835.1	Methanomada group	Methanobacteria	Eukyarchaea	80	50	0	25	100	0	0	0	0	0	0
GCA_902802065.1_Rumen_uncultured_genome_RUG14729_genomic.fna.faa	GCA_902802065.1	Methanomada group	Methanobacteria	Eukyarchaea	60	50	0	12.5	100	0	0	0	0	0	0
GCA_003266145.1_ASM326614v1_genomic.fna.faa	GCA_003266145.1	Methanomada group	Methanobacteria	Eukyarchaea	60	50	0	12.5	100	0	0	0	0	0	0
GCA_000151245.1_ASM15124v1_genomic.fna.faa	GCA_000151245.1	Methanomada group	Methanobacteria	Eukyarchaea	80	50	0	25	100	0	0	0	0	0	0
GCA_902794475.1_Rumen_uncultured_genome_RUG13973_genomic.fna.faa	GCA_902794475.1	Methanomada group	Methanobacteria	Eukyarchaea	60	50	0	25	100	0	0	0	0	0	0
GCA_902774705.1_Rumen_uncultured_genome_RUG11996_genomic.fna.faa	GCA_902774705.1	Methanomada group	Methanobacteria	Eukyarchaea	60	50	0	25	100	0	0	0	0	0	0
GCA_902786095.1_Rumen_uncultured_genome_RUG13139_genomic.fna.faa	GCA_902786095.1	Methanomada group	Methanobacteria	Eukyarchaea	80	50	0	12.5	100	0	0	0	0	0	0
GCA_902777475.1_Rumen_uncultured_genome_RUG12275_genomic.fna.faa	GCA_902777475.1	Methanomada group	Methanobacteria	Eukyarchaea	60	50	0	0	100	0	0	0	0	0	0
GCA_900114585.1_IMG-taxon_2593339150_annotated_assembly_genomic.fna.faa	GCA_900114585.1	Methanomada group	Methanobacteria	Eukyarchaea	60	50	0	12.5	100	0	0	0	0	0	0
GCA_003491285.1_ASM349128v1_genomic.fna.faa	GCA_003491285.1	Methanomada group	Methanobacteria	Eukyarchaea	80	50	0	25	100	0	0	0	50	33.3	0
GCA_902762095.1_Rumen_uncultured_genome_RUG10736_genomic.fna.faa	GCA_902762095.1	Methanomada group	Methanobacteria	Eukyarchaea	80	50	0	12.5	100	0	0	0	0	0	0
GCA_900315215.1_Rumen_uncultured_genome_RUG076_genomic.fna.faa	GCA_900315215.1	Methanomada group	Methanobacteria	Eukyarchaea	80	50	0	12.5	100	0	0	0	0	0	0
GCA_902799105.1_Rumen_uncultured_genome_RUG14438_genomic.fna.faa	GCA_902799105.1	Methanomada group	Methanobacteria	Eukyarchaea	60	50	0	25	100	0	0	0	0	0	0
GCA_902770715.1_Rumen_uncultured_genome_RUG11588_genomic.fna.faa	GCA_902770715.1	Methanomada group	Methanobacteria	Eukyarchaea	80	50	0	25	100	0	0	0	0	0	0
GCA_000404165.1_ASM40416v1_genomic.fna.faa	GCA_000404165.1	Methanomada group	Methanobacteria	Eukyarchaea	80	50	0	12.5	100	0	0	0	0	0	0
GCA_900316635.1_Rumen_uncultured_genome_RUG201_genomic.fna.faa	GCA_900316635.1	Methanomada group	Methanobacteria	Eukyarchaea	60	33.3	0	25	100	0	0	0	0	0	0
GCA_000529525.1_Methanobrevibacter_oralis_JMR01_genomic.fna.faa	GCA_000529525.1	Methanomada group	Methanobacteria	Eukyarchaea	80	50	0	12.5	100	0	0	0	0	0	0
GCA_002508965.1_ASM250896v1_genomic.fna.faa	GCA_002508965.1	Methanomada group	Methanobacteria	Eukyarchaea	40	50	0	12.5	100	0	0	0	0	0	0
GCA_002509745.1_ASM250974v1_genomic.fna.faa	GCA_002509745.1	Methanomada group	Methanobacteria	Eukyarchaea	60	50	0	25	100	100	0	0	50	0	0
GCA_002509005.1_ASM250900v1_genomic.fna.faa	GCA_002509005.1	Methanomada group	Methanobacteria	Eukyarchaea	60	50	0	12.5	100	0	0	0	0	0	0
GCA_001458655.1_Mb9_genomic.fna.faa	GCA_001458655.1	Methanomada group	Methanobacteria	Eukyarchaea	80	50	0	25	100	0	0	0	50	0	0
GCA_902800515.1_Rumen_uncultured_genome_RUG14577_genomic.fna.faa	GCA_902800515.1	Methanomada group	Methanobacteria	Eukyarchaea	60	50	0	25	100	0	0	0	0	0	0
GCA_902757435.1_Rumen_uncultured_genome_RUG10261_genomic.fna.faa	GCA_902757435.1	Methanomada group	Methanobacteria	Eukyarchaea	60	50	0	25	100	0	0	0	0	0	0
GCA_902757275.1_Rumen_uncultured_genome_RUG10244_genomic.fna.faa	GCA_902757275.1	Methanomada group	Methanobacteria	Eukyarchaea	80	50	0	12.5	100	0	0	0	0	0	0
GCA_008033705.1_ASM803370v1_genomic.fna.faa	GCA_008033705.1	Methanomada group	Methanobacteria	Eukyarchaea	80	50	0	12.5	100	100	0	0	0	0	0
GCA_003584625.1_ASM358462v1_genomic.fna.faa	GCA_003584625.1	Methanomada group	Methanobacteria	Eukyarchaea	80	50	0	12.5	100	0	0	0	0	0	0
GCA_002494495.1_ASM249449v1_genomic.fna.faa	GCA_002494495.1	Methanomada group	Methanobacteria	Eukyarchaea	60	50	0	12.5	100	0	0	0	100	33.3	0
GCA_902785855.1_Rumen_uncultured_genome_RUG13115_genomic.fna.faa	GCA_902785855.1	Methanomada group	Methanobacteria	Eukyarchaea	80	50	0	25	100	0	0	0	0	0	0
GCA_003166335.1_20110700_S2D_genomic.fna.faa	GCA_003166335.1	Methanomada group	Methanobacteria	Eukyarchaea	80	50	0	12.5	100	0	0	0	50	33.3	0
GCA_902765435.1_Rumen_uncultured_genome_RUG11063_genomic.fna.faa	GCA_902765435.1	Methanomada group	Methanobacteria	Eukyarchaea	60	50	0	25	100	0	0	0	0	0	0
GCA_002509125.1_ASM250912v1_genomic.fna.faa	GCA_002509125.1	Methanomada group	Methanobacteria	Eukyarchaea	60	50	0	12.5	100	0	0	0	0	0	0
GCA_003161815.1_20100900_E3D_genomic.fna.faa	GCA_003161815.1	Methanomada group	Methanobacteria	Eukyarchaea	20	50	0	12.5	100	0	0	0	0	33.3	0
GCA_002504485.1_ASM250448v1_genomic.fna.faa	GCA_002504485.1	Methanomada group	Methanobacteria	Eukyarchaea	80	50	0	12.5	100	0	0	0	0	0	0
GCA_902789505.1_Rumen_uncultured_genome_RUG13476_genomic.fna.faa	GCA_902789505.1	Methanomada group	Methanobacteria	Eukyarchaea	80	50	0	12.5	100	0	0	0	0	0	0
GCA_900318035.1_Rumen_uncultured_genome_RUG344_genomic.fna.faa	GCA_900318035.1	Methanomada group	Methanobacteria	Eukyarchaea	60	50	0	25	100	0	0	0	0	0	0
GCA_002496805.1_ASM249680v1_genomic.fna.faa	GCA_002496805.1	Methanomada group	Methanobacteria	Eukyarchaea	80	50	0	25	0	0	0	0	0	0	0
GCA_902757365.1_Rumen_uncultured_genome_RUG10252_genomic.fna.faa	GCA_902757365.1	Methanomada group	Methanobacteria	Eukyarchaea	60	50	0	12.5	100	0	0	0	0	0	0
GCA_002509665.1_ASM250966v1_genomic.fna.faa	GCA_002509665.1	Methanomada group	Methanobacteria	Eukyarchaea	80	50	0	0	100	0	0	0	0	0	0
GCA_002813675.1_ASM281367v1_genomic.fna.faa	GCA_002813675.1	Methanomada group	Methanobacteria	Eukyarchaea	80	50	0	37.5	100	0	100	0	50	33.3	0
GCA_001477655.1_ASM147765v1_genomic.fna.faa	GCA_001477655.1	Methanomada group	Methanobacteria	Eukyarchaea	80	50	0	12.5	100	0	0	0	0	0	0
GCA_902793795.1_Rumen_uncultured_genome_RUG13902_genomic.fna.faa	GCA_902793795.1	Methanomada group	Methanobacteria	Eukyarchaea	60	50	0	25	100	0	0	0	0	0	0
GCA_023617305.1_ASM2361730v1_genomic.fna.faa	GCA_023617305.1	Methanomada group	Methanobacteria	Eukyarchaea	80	50	0	25	100	0	0	0	0	0	0
GCA_900316895.1_Rumen_uncultured_genome_RUG236_genomic.fna.faa	GCA_900316895.1	Methanomada group	Methanobacteria	Eukyarchaea	60	50	0	25	100	0	0	0	0	0	0
GCA_002509045.1_ASM250904v1_genomic.fna.faa	GCA_002509045.1	Methanomada group	Methanobacteria	Eukyarchaea	60	50	0	12.5	100	0	0	0	100	33.3	0
GCA_902791535.1_Rumen_uncultured_genome_RUG13677_genomic.fna.faa	GCA_902791535.1	Methanomada group	Methanobacteria	Eukyarchaea	20	50	0	25	100	0	0	0	0	0	0
GCA_902769065.1_Rumen_uncultured_genome_RUG11418_genomic.fna.faa	GCA_902769065.1	Methanomada group	Methanobacteria	Eukyarchaea	60	50	0	12.5	100	0	0	0	0	0	0
GCA_902771355.1_Rumen_uncultured_genome_RUG11662_genomic.fna.faa	GCA_902771355.1	Methanomada group	Methanobacteria	Eukyarchaea	60	50	0	12.5	100	0	0	0	0	0	0
GCA_002497655.1_ASM249765v1_genomic.fna.faa	GCA_002497655.1	Methanomada group	Methanobacteria	Eukyarchaea	60	50	0	12.5	100	0	0	0	100	33.3	0
GCA_902758945.1_Rumen_uncultured_genome_RUG10414_genomic.fna.faa	GCA_902758945.1	Methanomada group	Methanobacteria	Eukyarchaea	60	50	0	25	100	0	0	0	0	0	0
GCA_900314545.1_Rumen_uncultured_genome_RUG011_genomic.fna.faa	GCA_900314545.1	Methanomada group	Methanobacteria	Eukyarchaea	80	50	0	0	100	0	0	0	0	0	0
GCA_002496555.1_ASM249655v1_genomic.fna.faa	GCA_002496555.1	Methanomada group	Methanobacteria	Eukyarchaea	80	50	0	12.5	100	0	0	0	0	0	0
GCA_002503565.1_ASM250356v1_genomic.fna.faa	GCA_002503565.1	Methanomada group	Methanobacteria	Eukyarchaea	80	50	0	12.5	100	0	0	0	0	0	0
GCA_902799005.1_Rumen_uncultured_genome_RUG14427_genomic.fna.faa	GCA_902799005.1	Methanomada group	Methanobacteria	Eukyarchaea	80	50	0	12.5	100	0	0	0	0	0	0
GCA_000008645.1_ASM864v1_genomic.fna.faa	GCA_000008645.1	Methanomada group	Methanobacteria	Eukyarchaea	80	50	0	12.5	100	100	0	0	0	0	0
GCA_003164415.1_20120700_S1D_genomic.fna.faa	GCA_003164415.1	Methanomada group	Methanobacteria	Eukyarchaea	80	50	0	12.5	100	0	100	0	0	0	0
GCA_002504505.1_ASM250450v1_genomic.fna.faa	GCA_002504505.1	Methanomada group	Methanobacteria	Eukyarchaea	80	50	0	12.5	100	0	0	0	50	33.3	0
GCA_902769795.1_Rumen_uncultured_genome_RUG11503_genomic.fna.faa	GCA_902769795.1	Methanomada group	Methanobacteria	Eukyarchaea	40	50	0	25	100	0	0	0	0	0	0
GCA_902768855.1_Rumen_uncultured_genome_RUG11403_genomic.fna.faa	GCA_902768855.1	Methanomada group	Methanobacteria	Eukyarchaea	80	50	0	0	100	0	0	0	0	0	0
GCA_002507025.1_ASM250702v1_genomic.fna.faa	GCA_002507025.1	Methanomada group	Methanobacteria	Eukyarchaea	80	50	0	12.5	100	0	0	0	0	0	0
GCA_000024185.1_ASM2418v1_genomic.fna.faa	GCA_000024185.1	Methanomada group	Methanobacteria	Eukyarchaea	60	50	0	12.5	100	0	0	0	0	33.3	0
GCA_000745485.1_ASM74548v1_genomic.fna.faa	GCA_000745485.1	Methanomada group	Methanobacteria	Eukyarchaea	80	50	0	12.5	100	100	0	0	50	0	0
GCA_900095295.1_MCBB_genomic.fna.faa	GCA_900095295.1	Methanomada group	Methanobacteria	Eukyarchaea	80	50	0	25	100	0	0	0	0	0	0
GCA_023167465.1_ASM2316746v1_genomic.fna.faa	GCA_023167465.1	Methanomada group	Methanobacteria	Eukyarchaea	80	50	0	12.5	100	0	0	0	0	0	0
GCA_902802035.1_Rumen_uncultured_genome_RUG14734_genomic.fna.faa	GCA_902802035.1	Methanomada group	Methanobacteria	Eukyarchaea	80	50	0	12.5	100	0	0	0	0	0	0
GCA_900315655.1_Rumen_uncultured_genome_RUG120_genomic.fna.faa	GCA_900315655.1	Methanomada group	Methanobacteria	Eukyarchaea	80	50	0	0	100	0	0	0	0	0	0
GCA_900317865.1_Rumen_uncultured_genome_RUG338_genomic.fna.faa	GCA_900317865.1	Methanomada group	Methanobacteria	Eukyarchaea	80	50	0	12.5	100	0	0	0	0	0	0
GCA_003162655.1_20100900_E2S_genomic.fna.faa	GCA_003162655.1	Methanomada group	Methanobacteria	Eukyarchaea	60	50	0	25	100	0	0	0	0	0	0
GCA_021442885.1_ASM2144288v1_genomic.fna.faa	GCA_021442885.1	Methanomada group	Methanobacteria	Eukyarchaea	80	50	0	12.5	100	0	0	0	0	0	0
GCA_902788045.1_Rumen_uncultured_genome_RUG13330_genomic.fna.faa	GCA_902788045.1	Methanomada group	Methanobacteria	Eukyarchaea	60	50	0	12.5	100	0	0	0	0	0	0
GCA_015062925.1_ASM1506292v1_genomic.fna.faa	GCA_015062925.1	Methanomada group	Methanobacteria	Eukyarchaea	80	50	0	25	100	0	0	0	0	0	0
GCA_002498385.1_ASM249838v1_genomic.fna.faa	GCA_002498385.1	Methanomada group	Methanobacteria	Eukyarchaea	80	50	0	12.5	100	0	0	0	0	0	0
GCA_900314615.1_Rumen_uncultured_genome_RUG018_genomic.fna.faa	GCA_900314615.1	Methanomada group	Methanobacteria	Eukyarchaea	60	50	0	25	100	0	0	0	0	0	0
GCA_014361345.1_ASM1436134v1_genomic.fna.faa	GCA_014361345.1	Methanomada group	Methanobacteria	Eukyarchaea	80	33.3	0	12.5	100	0	0	0	0	0	0
GCA_902778875.1_Rumen_uncultured_genome_RUG12411_genomic.fna.faa	GCA_902778875.1	Methanomada group	Methanobacteria	Eukyarchaea	80	50	0	12.5	100	0	0	0	0	0	0
GCA_900314605.1_Rumen_uncultured_genome_RUG012_genomic.fna.faa	GCA_900314605.1	Methanomada group	Methanobacteria	Eukyarchaea	80	50	0	0	100	0	0	0	0	0	0
GCA_021199865.1_ASM2119986v1_genomic.fna.faa	GCA_021199865.1	Methanomada group	Methanobacteria	Eukyarchaea	80	50	0	25	100	0	0	0	0	0	0
GCA_000191585.1_ASM19158v1_genomic.fna.faa	GCA_000191585.1	Methanomada group	Methanobacteria	Eukyarchaea	80	50	0	12.5	100	0	0	0	0	0	0
GCA_902762245.1_Rumen_uncultured_genome_RUG10743_genomic.fna.faa	GCA_902762245.1	Methanomada group	Methanobacteria	Eukyarchaea	60	50	0	25	100	0	0	0	0	0	0
GCA_003161875.1_20100900_E3D_genomic.fna.faa	GCA_003161875.1	Methanomada group	Methanobacteria	Eukyarchaea	60	50	0	25	100	0	100	0	0	0	0
GCA_902774685.1_Rumen_uncultured_genome_RUG11990_genomic.fna.faa	GCA_902774685.1	Methanomada group	Methanobacteria	Eukyarchaea	60	50	0	12.5	100	0	0	0	0	0	0
GCA_902759195.1_Rumen_uncultured_genome_RUG10437_genomic.fna.faa	GCA_902759195.1	Methanomada group	Methanobacteria	Eukyarchaea	80	50	0	12.5	100	0	0	0	0	0	0
GCA_902775725.1_Rumen_uncultured_genome_RUG12100_genomic.fna.faa	GCA_902775725.1	Methanomada group	Methanobacteria	Eukyarchaea	60	50	0	12.5	100	0	0	0	0	33.3	0
GCA_014361435.1_ASM1436143v1_genomic.fna.faa	GCA_014361435.1	Methanomada group	Methanobacteria	Eukyarchaea	60	50	0	12.5	100	100	0	0	0	0	0
GCA_018263095.1_ASM1826309v1_genomic.fna.faa	GCA_018263095.1	Methanomada group	Methanobacteria	Eukyarchaea	20	50	0	25	100	0	100	0	50	0	0
GCA_902763115.1_Rumen_uncultured_genome_RUG10830_genomic.fna.faa	GCA_902763115.1	Methanomada group	Methanobacteria	Eukyarchaea	60	50	0	25	100	0	0	0	0	0	0
GCA_900319875.1_Rumen_uncultured_genome_RUG526_genomic.fna.faa	GCA_900319875.1	Methanomada group	Methanobacteria	Eukyarchaea	60	50	0	25	100	0	0	0	0	0	0
GCA_023249725.1_ASM2324972v1_genomic.fna.faa	GCA_023249725.1	Methanomada group	Methanobacteria	Eukyarchaea	100	50	0	25	100	0	0	0	50	0	0
GCA_018379875.1_ASM1837987v1_genomic.fna.faa	GCA_018379875.1	Methanomada group	Methanobacteria	Eukyarchaea	80	50	0	25	100	0	0	0	0	0	0
GCA_003268005.1_ASM326800v1_genomic.fna.faa	GCA_003268005.1	Methanomada group	Methanobacteria	Eukyarchaea	60	50	0	25	100	0	0	0	0	0	0
GCA_002508985.1_ASM250898v1_genomic.fna.faa	GCA_002508985.1	Methanomada group	Methanobacteria	Eukyarchaea	40	50	0	25	100	0	0	0	0	33.3	0
GCA_002813695.1_ASM281369v1_genomic.fna.faa	GCA_002813695.1	Methanomada group	Methanobacteria	Eukyarchaea	80	50	0	25	100	0	100	0	50	33.3	0
GCA_902798025.1_Rumen_uncultured_genome_RUG14331_genomic.fna.faa	GCA_902798025.1	Methanomada group	Methanobacteria	Eukyarchaea	80	50	0	12.5	100	0	0	0	0	0	0
GCA_001563245.1_ASM156324v1_genomic.fna.faa	GCA_001563245.1	Methanomada group	Methanobacteria	Eukyarchaea	60	50	0	12.5	100	0	0	0	0	0	0
GCA_003266065.1_ASM326606v1_genomic.fna.faa	GCA_003266065.1	Methanomada group	Methanobacteria	Eukyarchaea	80	50	0	25	100	0	0	0	0	0	0
GCA_002813655.1_ASM281365v1_genomic.fna.faa	GCA_002813655.1	Methanomada group	Methanobacteria	Eukyarchaea	80	50	0	37.5	100	0	100	0	50	33.3	0
GCA_902759475.1_Rumen_uncultured_genome_RUG10470_genomic.fna.faa	GCA_902759475.1	Methanomada group	Methanobacteria	Eukyarchaea	60	50	0	25	100	0	0	0	0	0	0
GCA_002509065.1_ASM250906v1_genomic.fna.faa	GCA_002509065.1	Methanomada group	Methanobacteria	Eukyarchaea	60	33.3	0	25	0	0	0	0	0	0	0
GCA_016222945.1_ASM1622294v1_genomic.fna.faa	GCA_016222945.1	Methanomada group	Methanobacteria	Eukyarchaea	100	50	0	12.5	100	0	0	0	50	33.3	0
GCA_900320515.1_Rumen_uncultured_genome_RUG593_genomic.fna.faa	GCA_900320515.1	Methanomada group	Methanobacteria	Eukyarchaea	20	50	0	25	100	0	0	0	0	0	0
GCA_002508845.1_ASM250884v1_genomic.fna.faa	GCA_002508845.1	Methanomada group	Methanobacteria	Eukyarchaea	60	50	0	12.5	100	0	0	0	0	0	0
GCA_900313645.1_Rumen_uncultured_genome_RUG823_genomic.fna.faa	GCA_900313645.1	Methanomada group	Methanobacteria	Eukyarchaea	40	50	0	25	100	0	0	0	0	0	0
GCA_002502635.1_ASM250263v1_genomic.fna.faa	GCA_002502635.1	Methanomada group	Methanobacteria	Eukyarchaea	80	50	0	12.5	100	0	0	0	0	0	0
GCA_014361335.1_ASM1436133v1_genomic.fna.faa	GCA_014361335.1	Methanomada group	Methanobacteria	Eukyarchaea	80	33.3	0	12.5	100	0	100	0	50	0	0
GCA_015062805.1_ASM1506280v1_genomic.fna.faa	GCA_015062805.1	Methanomada group	Methanobacteria	Eukyarchaea	80	50	0	12.5	100	0	0	0	0	0	0
GCA_902798335.1_Rumen_uncultured_genome_RUG14349_genomic.fna.faa	GCA_902798335.1	Methanomada group	Methanobacteria	Eukyarchaea	60	50	0	25	100	0	0	0	0	0	0
GCA_014361405.1_ASM1436140v1_genomic.fna.faa	GCA_014361405.1	Methanomada group	Methanobacteria	Eukyarchaea	20	33.3	0	12.5	100	0	0	0	50	0	0
GCA_002505535.1_ASM250553v1_genomic.fna.faa	GCA_002505535.1	Methanomada group	Methanobacteria	Eukyarchaea	80	50	0	12.5	100	0	0	0	0	0	0
GCA_011620845.1_ASM1162084v1_genomic.fna.faa	GCA_011620845.1	Methanomada group	Methanobacteria	Eukyarchaea	100	50	0	12.5	100	0	0	0	0	0	0
GCA_902793735.1_Rumen_uncultured_genome_RUG13892_genomic.fna.faa	GCA_902793735.1	Methanomada group	Methanobacteria	Eukyarchaea	80	50	0	12.5	100	0	0	0	0	0	0
GCA_002498445.1_ASM249844v1_genomic.fna.faa	GCA_002498445.1	Methanomada group	Methanobacteria	Eukyarchaea	40	50	0	25	100	0	0	0	0	0	0
GCA_015062845.1_ASM1506284v1_genomic.fna.faa	GCA_015062845.1	Methanomada group	Methanobacteria	Eukyarchaea	80	50	0	25	100	0	0	0	0	0	0
GCA_902756745.1_Rumen_uncultured_genome_RUG10188_genomic.fna.faa	GCA_902756745.1	Methanomada group	Methanobacteria	Eukyarchaea	60	50	0	25	100	0	0	0	0	0	0
GCA_003266105.1_ASM326610v1_genomic.fna.faa	GCA_003266105.1	Methanomada group	Methanobacteria	Eukyarchaea	80	50	0	25	100	0	0	0	0	0	0
GCA_902788375.1_Rumen_uncultured_genome_RUG13366_genomic.fna.faa	GCA_902788375.1	Methanomada group	Methanobacteria	Eukyarchaea	60	50	0	25	100	0	0	0	0	0	0
GCA_902765275.1_Rumen_uncultured_genome_RUG11042_genomic.fna.faa	GCA_902765275.1	Methanomada group	Methanobacteria	Eukyarchaea	20	50	0	12.5	100	0	0	0	0	0	0
GCA_003151535.1_20120700_P3D_genomic.fna.faa	GCA_003151535.1	Methanomada group	Methanobacteria	Eukyarchaea	80	50	0	12.5	100	0	0	0	0	0	0
GCA_900314695.1_Rumen_uncultured_genome_RUG031_genomic.fna.faa	GCA_900314695.1	Methanomada group	Methanobacteria	Eukyarchaea	60	50	0	25	100	0	0	0	0	0	0
GCA_022838685.1_ASM2283868v1_genomic.fna.faa	GCA_022838685.1	Methanomada group	Methanobacteria	Eukyarchaea	80	50	0	12.5	100	0	0	0	50	33.3	0
GCA_002509095.1_ASM250909v1_genomic.fna.faa	GCA_002509095.1	Methanomada group	Methanobacteria	Eukyarchaea	20	50	0	12.5	100	0	0	0	0	0	0
GCA_000513315.1_ANOR1_genomic.fna.faa	GCA_000513315.1	Methanomada group	Methanobacteria	Eukyarchaea	60	50	0	12.5	100	0	0	0	0	0	0
GCA_003162115.1_20100900_E2D_genomic.fna.faa	GCA_003162115.1	Methanomada group	Methanobacteria	Eukyarchaea	60	50	0	25	100	0	0	0	0	0	0
GCA_016207965.1_ASM1620796v1_genomic.fna.faa	GCA_016207965.1	Methanomada group	Methanobacteria	Eukyarchaea	80	33.3	0	25	100	0	0	0	0	0	0
GCA_002506795.1_ASM250679v1_genomic.fna.faa	GCA_002506795.1	Methanomada group	Methanobacteria	Eukyarchaea	80	50	0	12.5	100	0	0	0	0	0	0
GCA_009712615.1_ASM971261v1_genomic.fna.faa	GCA_009712615.1	Methanomada group	Methanobacteria	Eukyarchaea	80	50	0	12.5	100	0	0	0	0	0	0
GCA_902771225.1_Rumen_uncultured_genome_RUG11657_genomic.fna.faa	GCA_902771225.1	Methanomada group	Methanobacteria	Eukyarchaea	80	50	0	12.5	100	0	0	0	0	0	0
GCA_902764425.1_Rumen_uncultured_genome_RUG10959_genomic.fna.faa	GCA_902764425.1	Methanomada group	Methanobacteria	Eukyarchaea	80	50	0	12.5	100	0	0	0	0	0	0
GCA_902384015.1_UHGG_MGYG-HGUT-02164_genomic.fna.faa	GCA_902384015.1	Methanomada group	Methanobacteria	Eukyarchaea	60	50	0	12.5	100	0	0	0	0	0	0
GCA_003266075.1_ASM326607v1_genomic.fna.faa	GCA_003266075.1	Methanomada group	Methanobacteria	Eukyarchaea	100	33.3	0	0	0	0	0	0	0	0	0
GCA_002503585.1_ASM250358v1_genomic.fna.faa	GCA_002503585.1	Methanomada group	Methanobacteria	Eukyarchaea	80	50	0	12.5	100	0	0	0	0	0	0
GCA_902798355.1_Rumen_uncultured_genome_RUG14362_genomic.fna.faa	GCA_902798355.1	Methanomada group	Methanobacteria	Eukyarchaea	20	50	0	25	100	0	0	0	0	0	0
GCA_019669925.1_ASM1966992v1_genomic.fna.faa	GCA_019669925.1	Methanomada group	Methanobacteria	Eukyarchaea	60	50	0	12.5	100	0	0	0	0	0	0
GCA_015062985.1_ASM1506298v1_genomic.fna.faa	GCA_015062985.1	Methanomada group	Methanobacteria	Eukyarchaea	20	50	0	25	100	0	0	0	0	0	0
GCA_003164775.1_20120700_S1D_genomic.fna.faa	GCA_003164775.1	Methanomada group	Methanobacteria	Eukyarchaea	80	50	0	12.5	100	0	100	0	0	0	0
GCA_902759285.1_Rumen_uncultured_genome_RUG10452_genomic.fna.faa	GCA_902759285.1	Methanomada group	Methanobacteria	Eukyarchaea	80	50	0	12.5	100	0	0	0	0	0	0
GCA_002502445.1_ASM250244v1_genomic.fna.faa	GCA_002502445.1	Methanomada group	Methanobacteria	Eukyarchaea	80	50	0	37.5	0	0	100	0	50	33.3	0
GCA_003157375.1_20120600_E2D_genomic.fna.faa	GCA_003157375.1	Methanomada group	Methanobacteria	Eukyarchaea	60	50	0	25	100	0	100	0	0	0	0
GCA_002498905.1_ASM249890v1_genomic.fna.faa	GCA_002498905.1	Methanomada group	Methanobacteria	Eukyarchaea	60	50	0	12.5	100	0	0	0	100	33.3	0
GCA_002504965.1_ASM250496v1_genomic.fna.faa	GCA_002504965.1	Methanomada group	Methanobacteria	Eukyarchaea	60	50	0	12.5	100	0	0	0	50	33.3	0
GCA_003266165.1_ASM326616v1_genomic.fna.faa	GCA_003266165.1	Methanomada group	Methanobacteria	Eukyarchaea	60	50	0	25	0	0	0	0	0	0	0
GCA_902755965.1_Rumen_uncultured_genome_RUG10116_genomic.fna.faa	GCA_902755965.1	Methanomada group	Methanobacteria	Eukyarchaea	20	50	0	25	100	0	0	0	0	0	0
GCA_018263005.1_ASM1826300v1_genomic.fna.faa	GCA_018263005.1	Methanomada group	Methanobacteria	Eukyarchaea	80	50	0	12.5	100	100	100	0	50	33.3	0
GCA_902758515.1_Rumen_uncultured_genome_RUG10376_genomic.fna.faa	GCA_902758515.1	Methanomada group	Methanobacteria	Eukyarchaea	60	50	0	12.5	100	0	0	0	0	0	0
GCA_900313195.1_Rumen_uncultured_genome_RUG787_genomic.fna.faa	GCA_900313195.1	Methanomada group	Methanobacteria	Eukyarchaea	60	50	0	25	100	0	0	0	0	0	0
GCA_902785665.1_Rumen_uncultured_genome_RUG13094_genomic.fna.faa	GCA_902785665.1	Methanomada group	Methanobacteria	Eukyarchaea	40	50	0	12.5	0	0	0	0	0	0	0
GCA_000499765.1_Methanobacterium_genomic.fna.faa	GCA_000499765.1	Methanomada group	Methanobacteria	Eukyarchaea	80	50	0	12.5	100	0	0	0	0	0	0
GCA_002496065.1_ASM249606v1_genomic.fna.faa	GCA_002496065.1	Methanomada group	Methanobacteria	Eukyarchaea	60	50	0	12.5	100	0	0	0	0	0	0
GCA_000828575.1_ASM82857v1_genomic.fna.faa	GCA_000828575.1	Methanomada group	Methanobacteria	Eukyarchaea	80	50	0	12.5	100	100	0	0	0	0	0
GCA_000214725.1_ASM21472v1_genomic.fna.faa	GCA_000214725.1	Methanomada group	Methanobacteria	Eukyarchaea	60	50	0	12.5	100	0	0	0	0	0	0
GCA_002499035.1_ASM249903v1_genomic.fna.faa	GCA_002499035.1	Methanomada group	Methanobacteria	Eukyarchaea	80	50	0	12.5	100	0	0	0	0	0	0
GCA_902758075.1_Rumen_uncultured_genome_RUG10318_genomic.fna.faa	GCA_902758075.1	Methanomada group	Methanobacteria	Eukyarchaea	60	33.3	0	25	0	0	0	0	0	0	0
GCA_002498225.1_ASM249822v1_genomic.fna.faa	GCA_002498225.1	Methanomada group	Methanobacteria	Eukyarchaea	80	50	0	12.5	100	0	0	0	0	0	0
GCA_905233105.1_RUG30046_genomic.fna.faa	GCA_905233105.1	Methanomada group	Methanobacteria	Eukyarchaea	60	50	0	25	100	0	0	0	0	0	0
GCA_013330715.1_ASM1333071v1_genomic.fna.faa	GCA_013330715.1	Methanomada group	Methanobacteria	Eukyarchaea	80	50	0	12.5	100	100	0	0	0	0	0
GCA_900316425.1_Rumen_uncultured_genome_RUG186_genomic.fna.faa	GCA_900316425.1	Methanomada group	Methanobacteria	Eukyarchaea	80	50	0	12.5	100	0	0	0	0	0	0
GCA_013331025.1_ASM1333102v1_genomic.fna.faa	GCA_013331025.1	Methanomada group	Methanobacteria	Eukyarchaea	80	50	0	12.5	100	0	0	0	50	0	0
GCA_002503185.1_ASM250318v1_genomic.fna.faa	GCA_002503185.1	Methanomada group	Methanobacteria	Eukyarchaea	60	50	0	12.5	0	0	0	0	50	33.3	0
GCA_002494885.1_ASM249488v1_genomic.fna.faa	GCA_002494885.1	Methanomada group	Methanobacteria	Eukyarchaea	100	50	0	12.5	100	0	0	0	0	33.3	0
GCA_022846175.1_ASM2284617v1_genomic.fna.faa	GCA_022846175.1	Methanomada group	Methanobacteria	Eukyarchaea	80	50	0	25	100	0	0	0	0	0	0
GCA_902767825.1_Rumen_uncultured_genome_RUG11303_genomic.fna.faa	GCA_902767825.1	Methanomada group	Methanobacteria	Eukyarchaea	60	50	0	25	100	0	0	0	0	33.3	0
GCA_002504725.1_ASM250472v1_genomic.fna.faa	GCA_002504725.1	Methanomada group	Methanobacteria	Eukyarchaea	100	50	0	12.5	100	100	0	0	100	0	0
GCA_902781165.1_Rumen_uncultured_genome_RUG12644_genomic.fna.faa	GCA_902781165.1	Methanomada group	Methanobacteria	Eukyarchaea	60	50	0	12.5	100	0	0	0	0	0	0
GCA_000151225.1_ASM15122v1_genomic.fna.faa	GCA_000151225.1	Methanomada group	Methanobacteria	Eukyarchaea	80	50	0	25	100	0	0	0	0	0	0
GCA_902795335.1_Rumen_uncultured_genome_RUG14054_genomic.fna.faa	GCA_902795335.1	Methanomada group	Methanobacteria	Eukyarchaea	60	50	0	12.5	100	0	0	0	0	0	0
GCA_900315355.1_Rumen_uncultured_genome_RUG092_genomic.fna.faa	GCA_900315355.1	Methanomada group	Methanobacteria	Eukyarchaea	60	50	0	25	100	0	0	0	0	0	0
GCA_002509085.1_ASM250908v1_genomic.fna.faa	GCA_002509085.1	Methanomada group	Methanobacteria	Eukyarchaea	100	50	0	12.5	0	100	0	0	0	0	0
GCA_009914355.1_ASM991435v1_genomic.fna.faa	GCA_009914355.1	Methanomada group	Methanobacteria	Eukyarchaea	80	50	0	12.5	100	100	0	0	0	0	0
GCA_934882635.1_MTG239_bin.1.fa_genomic.fna.faa	GCA_934882635.1	Methanomada group	Methanobacteria	Eukyarchaea	80	50	0	25	100	0	0	0	0	0	0
GCA_902800615.1_Rumen_uncultured_genome_RUG14594_genomic.fna.faa	GCA_902800615.1	Methanomada group	Methanobacteria	Eukyarchaea	60	50	0	25	100	0	0	0	0	0	0
GCA_902758425.1_Rumen_uncultured_genome_RUG10359_genomic.fna.faa	GCA_902758425.1	Methanomada group	Methanobacteria	Eukyarchaea	80	50	0	0	100	0	0	0	0	0	0
GCA_900319535.1_Rumen_uncultured_genome_RUG492_genomic.fna.faa	GCA_900319535.1	Methanomada group	Methanobacteria	Eukyarchaea	80	50	0	12.5	100	0	0	0	0	0	0
GCA_900319985.1_Rumen_uncultured_genome_RUG545_genomic.fna.faa	GCA_900319985.1	Methanomada group	Methanobacteria	Eukyarchaea	60	33.3	0	25	0	0	0	0	0	0	0
GCA_015062885.1_ASM1506288v1_genomic.fna.faa	GCA_015062885.1	Methanomada group	Methanobacteria	Eukyarchaea	20	50	0	25	100	0	0	0	0	0	0
GCA_900313755.1_Rumen_uncultured_genome_RUG833_genomic.fna.faa	GCA_900313755.1	Methanomada group	Methanobacteria	Eukyarchaea	20	50	0	25	100	0	0	0	0	0	0
GCA_002504765.1_ASM250476v1_genomic.fna.faa	GCA_002504765.1	Methanomada group	Methanobacteria	Eukyarchaea	80	50	0	12.5	100	0	0	0	0	0	0
GCA_002509015.1_ASM250901v1_genomic.fna.faa	GCA_002509015.1	Methanomada group	Methanobacteria	Eukyarchaea	60	50	0	25	100	0	0	0	0	0	0
GCA_902800035.1_Rumen_uncultured_genome_RUG14542_genomic.fna.faa	GCA_902800035.1	Methanomada group	Methanobacteria	Eukyarchaea	60	50	0	12.5	100	0	0	0	0	0	0
GCA_902774505.1_Rumen_uncultured_genome_RUG11980_genomic.fna.faa	GCA_902774505.1	Methanomada group	Methanobacteria	Eukyarchaea	60	50	0	12.5	100	0	0	0	0	0	0
GCA_015062815.1_ASM1506281v1_genomic.fna.faa	GCA_015062815.1	Methanomada group	Methanobacteria	Eukyarchaea	80	50	0	12.5	100	0	0	0	0	0	0
GCA_902785715.1_Rumen_uncultured_genome_RUG13099_genomic.fna.faa	GCA_902785715.1	Methanomada group	Methanobacteria	Eukyarchaea	60	50	0	12.5	100	0	0	0	0	33.3	0
GCA_902785165.1_Rumen_uncultured_genome_RUG13036_genomic.fna.faa	GCA_902785165.1	Methanomada group	Methanobacteria	Eukyarchaea	60	50	0	25	100	0	0	0	0	0	0
GCA_902789715.1_Rumen_uncultured_genome_RUG13492_genomic.fna.faa	GCA_902789715.1	Methanomada group	Methanobacteria	Eukyarchaea	60	50	0	25	100	0	0	0	0	0	0
GCA_002497365.1_ASM249736v1_genomic.fna.faa	GCA_002497365.1	Methanomada group	Methanobacteria	Eukyarchaea	60	50	0	12.5	100	0	0	0	100	33.3	0
GCA_015063005.1_ASM1506300v1_genomic.fna.faa	GCA_015063005.1	Methanomada group	Methanobacteria	Eukyarchaea	80	50	0	12.5	100	0	0	0	0	0	0
GCA_902792995.1_Rumen_uncultured_genome_RUG13823_genomic.fna.faa	GCA_902792995.1	Methanomada group	Methanobacteria	Eukyarchaea	80	50	0	0	100	0	0	0	0	0	0
GCA_902801575.1_Rumen_uncultured_genome_RUG14686_genomic.fna.faa	GCA_902801575.1	Methanomada group	Methanobacteria	Eukyarchaea	20	50	0	12.5	100	0	0	0	0	33.3	0
GCA_002495625.1_ASM249562v1_genomic.fna.faa	GCA_002495625.1	Methanomada group	Methanobacteria	Eukyarchaea	80	50	0	12.5	100	0	0	0	50	33.3	0
GCA_013330375.1_ASM1333037v1_genomic.fna.faa	GCA_013330375.1	Methanomada group	Methanobacteria	Eukyarchaea	80	50	0	12.5	100	100	0	0	0	0	0
GCA_902801725.1_Rumen_uncultured_genome_RUG14697_genomic.fna.faa	GCA_902801725.1	Methanomada group	Methanobacteria	Eukyarchaea	60	50	0	25	100	0	0	0	0	0	0
GCA_002498055.1_ASM249805v1_genomic.fna.faa	GCA_002498055.1	Methanomada group	Methanobacteria	Eukyarchaea	60	50	0	12.5	0	0	0	0	100	33.3	0
GCA_003491305.1_ASM349130v1_genomic.fna.faa	GCA_003491305.1	Methanomada group	Methanobacteria	Eukyarchaea	80	50	0	25	100	0	0	0	50	0	0
GCA_022709145.1_ASM2270914v1_genomic.fna.faa	GCA_022709145.1	unclassified Euryarchaeota	Methanobacteria	Eukyarchaea	80	50	0	12.5	0	0	0	0	0	0	0
GCA_015062935.1_ASM1506293v1_genomic.fna.faa	GCA_015062935.1	Methanomada group	Methanobacteria	Eukyarchaea	60	50	0	25	100	0	0	0	0	0	0
GCA_900289035.1_PRJEB24872_genomic.fna.faa	GCA_900289035.1	Methanomada group	Methanobacteria	Eukyarchaea	80	50	0	12.5	100	0	0	0	0	0	0
GCA_015063035.1_ASM1506303v1_genomic.fna.faa	GCA_015063035.1	Methanomada group	Methanobacteria	Eukyarchaea	60	50	0	12.5	100	0	0	0	0	0	0
GCA_018053885.1_ASM1805388v1_genomic.fna.faa	GCA_018053885.1	Methanomada group	Methanobacteria	Eukyarchaea	80	33.3	0	25	100	0	0	0	0	0	0
GCA_905233225.1_RUG30013_genomic.fna.faa	GCA_905233225.1	Methanomada group	Methanobacteria	Eukyarchaea	60	50	0	25	100	0	0	0	0	0	0
GCA_002495685.1_ASM249568v1_genomic.fna.faa	GCA_002495685.1	Methanomada group	Methanobacteria	Eukyarchaea	60	50	0	12.5	100	0	0	0	0	0	0
GCA_002502855.1_ASM250285v1_genomic.fna.faa	GCA_002502855.1	Methanomada group	Methanobacteria	Eukyarchaea	80	50	0	12.5	100	0	0	0	0	33.3	0
GCA_000746075.1_ASM74607v1_genomic.fna.faa	GCA_000746075.1	Methanomada group	Methanobacteria	Eukyarchaea	80	50	0	12.5	100	100	0	0	50	0	0
GCA_000437055.1_MGS186_genomic.fna.faa	GCA_000437055.1	Methanomada group	Methanobacteria	Eukyarchaea	80	50	0	25	100	0	0	0	0	0	0
GCA_002496545.1_ASM249654v1_genomic.fna.faa	GCA_002496545.1	Methanomada group	Methanobacteria	Eukyarchaea	80	50	0	25	0	0	0	0	0	0	0
GCA_902784295.1_Rumen_uncultured_genome_RUG12954_genomic.fna.faa	GCA_902784295.1	Methanomada group	Methanobacteria	Eukyarchaea	60	50	0	25	100	0	0	0	0	0	0
GCA_902784715.1_Rumen_uncultured_genome_RUG12995_genomic.fna.faa	GCA_902784715.1	Methanomada group	Methanobacteria	Eukyarchaea	60	50	0	12.5	100	0	0	0	0	0	0
GCA_002508905.1_ASM250890v1_genomic.fna.faa	GCA_002508905.1	Methanomada group	Methanobacteria	Eukyarchaea	60	50	0	12.5	100	0	0	0	0	0	0
GCA_902801775.1_Rumen_uncultured_genome_RUG14703_genomic.fna.faa	GCA_902801775.1	Methanomada group	Methanobacteria	Eukyarchaea	80	50	0	12.5	100	0	0	0	0	0	0
GCA_900654205.1_PRJEB30652_genomic.fna.faa	GCA_900654205.1	Methanomada group	Methanobacteria	Eukyarchaea	80	50	0	25	100	0	0	0	0	0	0
GCA_002505605.1_ASM250560v1_genomic.fna.faa	GCA_002505605.1	Methanomada group	Methanobacteria	Eukyarchaea	60	50	0	25	100	0	0	0	0	0	0
GCA_002496295.1_ASM249629v1_genomic.fna.faa	GCA_002496295.1	Methanomada group	Methanobacteria	Eukyarchaea	60	50	0	12.5	100	0	0	0	0	0	0
GCA_000953115.1_DSM1535_genomic.fna.faa	GCA_000953115.1	Methanomada group	Methanobacteria	Eukyarchaea	80	50	0	25	100	0	0	0	50	0	0
GCA_902799565.1_Rumen_uncultured_genome_RUG14484_genomic.fna.faa	GCA_902799565.1	Methanomada group	Methanobacteria	Eukyarchaea	60	50	0	12.5	100	0	0	0	0	0	0
GCA_902757195.1_Rumen_uncultured_genome_RUG10238_genomic.fna.faa	GCA_902757195.1	Methanomada group	Methanobacteria	Eukyarchaea	20	50	0	25	100	0	0	0	0	0	0
GCA_002503125.1_ASM250312v1_genomic.fna.faa	GCA_002503125.1	Methanomada group	Methanobacteria	Eukyarchaea	80	50	0	12.5	100	0	0	0	0	0	0
GCA_902768765.1_Rumen_uncultured_genome_RUG11386_genomic.fna.faa	GCA_902768765.1	Methanomada group	Methanobacteria	Eukyarchaea	60	50	0	12.5	100	0	0	0	0	0	0
GCA_902764015.1_Rumen_uncultured_genome_RUG10921_genomic.fna.faa	GCA_902764015.1	Methanomada group	Methanobacteria	Eukyarchaea	20	50	0	25	100	0	0	0	0	0	0
GCA_019931065.1_ASM1993106v1_genomic.fna.faa	GCA_019931065.1	Methanomada group	Methanobacteria	Eukyarchaea	60	50	0	25	100	0	0	0	50	33.3	0
GCA_018784305.1_ASM1878430v1_genomic.fna.faa	GCA_018784305.1	Methanomada group	Methanobacteria	Eukyarchaea	80	50	0	25	100	0	0	0	0	0	0
GCA_902800455.1_Rumen_uncultured_genome_RUG14569_genomic.fna.faa	GCA_902800455.1	Methanomada group	Methanobacteria	Eukyarchaea	80	50	0	12.5	100	0	0	0	0	0	0
GCA_002502845.1_ASM250284v1_genomic.fna.faa	GCA_002502845.1	Methanomada group	Methanobacteria	Eukyarchaea	60	50	0	12.5	100	0	0	0	50	33.3	0
GCA_002505765.1_ASM250576v1_genomic.fna.faa	GCA_002505765.1	Methanomada group	Methanobacteria	Eukyarchaea	80	50	0	12.5	100	0	0	0	50	0	0
GCA_009917665.1_ASM991766v1_genomic.fna.faa	GCA_009917665.1	Methanomada group	Methanobacteria	Eukyarchaea	80	50	0	12.5	100	100	0	0	0	0	0
GCA_000251105.1_ASM25110v1_genomic.fna.faa	GCA_000251105.1	Stenosarchaea group	Methanocellia	Eukyarchaea	60	50	0	25	100	0	0	0	100	0	0
GCA_000011005.1_ASM1100v1_genomic.fna.faa	GCA_000011005.1	Stenosarchaea group	Methanocellia	Eukyarchaea	60	50	0	37.5	100	0	0	0	100	0	0
GCA_000063445.1_ASM6344v1_genomic.fna.faa	GCA_000063445.1	Stenosarchaea group	Methanocellia	Eukyarchaea	60	50	0	12.5	100	0	0	0	100	0	0
GCA_013761045.1_ASM1376104v1_genomic.fna.faa	GCA_013761045.1	Methanomada group	Methanococci	Eukyarchaea	60	50	0	12.5	100	0	0	0	50	0	0
GCA_013761205.1_ASM1376120v1_genomic.fna.faa	GCA_013761205.1	Methanomada group	Methanococci	Eukyarchaea	60	50	0	12.5	100	0	0	0	50	0	0
GCA_000179575.2_ASM17957v2_genomic.fna.faa	GCA_000179575.2	Methanomada group	Methanococci	Eukyarchaea	80	50	0	12.5	100	0	0	0	0	0	0
GCA_013761225.1_ASM1376122v1_genomic.fna.faa	GCA_013761225.1	Methanomada group	Methanococci	Eukyarchaea	60	50	0	12.5	100	0	0	0	50	0	0
GCA_014207325.1_ASM1420732v1_genomic.fna.faa	GCA_014207325.1	Methanomada group	Methanococci	Eukyarchaea	60	50	0	12.5	100	0	0	0	50	0	0
GCA_000739065.1_ASM73906v1_genomic.fna.faa	GCA_000739065.1	Methanomada group	Methanococci	Eukyarchaea	60	50	0	12.5	100	0	0	0	0	0	0
GCA_000828555.1_ASM82855v1_genomic.fna.faa	GCA_000828555.1	Methanomada group	Methanococci	Eukyarchaea	60	50	0	12.5	100	0	0	0	50	0	0
GCA_000025525.1_ASM2552v1_genomic.fna.faa	GCA_000025525.1	Methanomada group	Methanococci	Eukyarchaea	60	50	0	25	100	0	0	0	0	0	0
GCA_014203295.1_ASM1420329v1_genomic.fna.faa	GCA_014203295.1	Methanomada group	Methanococci	Eukyarchaea	60	50	0	12.5	100	0	0	0	50	0	0
GCA_015709365.1_ASM1570936v1_genomic.fna.faa	GCA_015709365.1	Methanomada group	Methanococci	Eukyarchaea	60	50	0	12.5	100	0	0	0	50	0	0
GCA_000017185.1_ASM1718v1_genomic.fna.faa	GCA_000017185.1	Methanomada group	Methanococci	Eukyarchaea	60	50	0	12.5	100	0	0	0	0	0	0
GCA_000017165.1_ASM1716v1_genomic.fna.faa	GCA_000017165.1	Methanomada group	Methanococci	Eukyarchaea	80	50	0	12.5	100	0	0	0	0	0	0
GCA_000828535.1_ASM82853v1_genomic.fna.faa	GCA_000828535.1	Methanomada group	Methanococci	Eukyarchaea	60	50	0	12.5	100	0	0	0	50	0	0
GCA_013761165.1_ASM1376116v1_genomic.fna.faa	GCA_013761165.1	Methanomada group	Methanococci	Eukyarchaea	60	50	0	12.5	100	0	0	0	50	0	0
GCA_000016125.1_ASM1612v1_genomic.fna.faa	GCA_000016125.1	Methanomada group	Methanococci	Eukyarchaea	80	50	0	12.5	100	0	0	0	50	0	0
GCA_902827205.1_Methanocaldococcus_lauensis_SG1_genomic.fna.faa	GCA_902827205.1	Methanomada group	Methanococci	Eukyarchaea	60	50	0	25	100	0	0	0	0	0	0
GCA_002494795.1_ASM249479v1_genomic.fna.faa	GCA_002494795.1	Stenosarchaea group	Methanococci	Eukyarchaea	100	50	0	25	100	0	0	0	0	0	0
GCA_000011585.1_ASM1158v1_genomic.fna.faa	GCA_000011585.1	Methanomada group	Methanococci	Eukyarchaea	60	50	0	12.5	100	0	0	0	50	0	0
GCA_013761055.1_ASM1376105v1_genomic.fna.faa	GCA_013761055.1	Methanomada group	Methanococci	Eukyarchaea	60	50	0	12.5	100	0	0	0	50	0	0
GCA_002945325.1_ASM294532v1_genomic.fna.faa	GCA_002945325.1	Methanomada group	Methanococci	Eukyarchaea	60	50	0	12.5	100	0	0	0	0	0	0
GCA_013761085.1_ASM1376108v1_genomic.fna.faa	GCA_013761085.1	Methanomada group	Methanococci	Eukyarchaea	60	50	0	12.5	100	0	0	0	50	0	0
GCA_000023985.1_ASM2398v1_genomic.fna.faa	GCA_000023985.1	Methanomada group	Methanococci	Eukyarchaea	60	50	0	25	100	0	0	0	0	0	0
GCA_902827225.1_Methanocaldococcus_lauensis_SG7_genomic.fna.faa	GCA_902827225.1	Methanomada group	Methanococci	Eukyarchaea	80	50	0	25	100	0	0	0	0	0	0
GCA_003052125.1_ASM305212v1_genomic.fna.faa	GCA_003052125.1	Methanomada group	Methanococci	Eukyarchaea	60	50	0	12.5	100	0	0	0	50	0	0
GCA_000214415.1_ASM21441v1_genomic.fna.faa	GCA_000214415.1	Methanomada group	Methanococci	Eukyarchaea	60	50	0	12.5	100	0	0	0	0	0	0
GCA_016907005.1_ASM1690700v1_genomic.fna.faa	GCA_016907005.1	Methanomada group	Methanococci	Eukyarchaea	60	50	0	25	100	0	0	0	50	0	0
GCA_000220645.1_ASM22064v1_genomic.fna.faa	GCA_000220645.1	Methanomada group	Methanococci	Eukyarchaea	60	50	0	12.5	100	0	0	0	50	0	0
GCA_013761135.1_ASM1376113v1_genomic.fna.faa	GCA_013761135.1	Methanomada group	Methanococci	Eukyarchaea	60	50	0	12.5	100	0	0	0	50	0	0
GCA_000024625.1_ASM2462v1_genomic.fna.faa	GCA_000024625.1	Methanomada group	Methanococci	Eukyarchaea	60	50	0	12.5	100	0	0	0	0	0	0
GCA_013760955.1_ASM1376095v1_genomic.fna.faa	GCA_013760955.1	Methanomada group	Methanococci	Eukyarchaea	60	50	0	12.5	100	0	0	0	0	0	0
GCA_003351865.1_ASM335186v1_genomic.fna.faa	GCA_003351865.1	Methanomada group	Methanococci	Eukyarchaea	60	50	0	12.5	100	0	0	0	0	0	0
GCA_014207315.1_ASM1420731v1_genomic.fna.faa	GCA_014207315.1	Methanomada group	Methanococci	Eukyarchaea	60	50	0	12.5	100	0	0	0	50	0	0
GCA_013329685.1_ASM1332968v1_genomic.fna.faa	GCA_013329685.1	Methanomada group	Methanococci	Eukyarchaea	60	50	0	25	100	0	0	0	0	0	0
GCA_000091665.1_ASM9166v1_genomic.fna.faa	GCA_000091665.1	Methanomada group	Methanococci	Eukyarchaea	60	50	0	25	100	0	0	0	0	0	0
GCA_013761105.1_ASM1376110v1_genomic.fna.faa	GCA_013761105.1	Methanomada group	Methanococci	Eukyarchaea	60	50	0	12.5	100	0	0	0	50	0	0
GCA_019561565.1_ASM1956156v1_genomic.fna.faa	GCA_019561565.1	Methanomada group	Methanococci	Eukyarchaea	80	50	0	0	100	0	0	0	0	0	0
GCA_013329575.1_ASM1332957v1_genomic.fna.faa	GCA_013329575.1	Stenosarchaea group	Methanoliparia	Eukyarchaea	100	50	0	12.5	100	0	0	0	0	0	0
GCA_902158745.1_MASP_genomic.fna.faa	GCA_902158745.1	Candidatus Methanoliparia	Methanoliparia	Eukyarchaea	60	33.3	0	0	100	0	0	0	0	0	0
GCA_013331365.1_ASM1333136v1_genomic.fna.faa	GCA_013331365.1	Stenosarchaea group	Methanoliparia	Eukyarchaea	60	50	0	12.5	100	0	0	0	0	0	0
GCA_014361425.1_ASM1436142v1_genomic	GCA_014361425.1	Candidatus Verstraetearchaeota	Methanomethylicia	TACK	60	50	0	25	100	100	0	0	0	0	0
GCA_014361445.1_ASM1436144v1_genomic	GCA_014361445.1	Candidatus Verstraetearchaeota	Methanomethylicia	TACK	80	50	0	12.5	100	0	0	0	0	0	0
GCA_014361455.1_ASM1436145v1_genomic	GCA_014361455.1	Candidatus Verstraetearchaeota	Methanomethylicia	TACK	20	50	0	37.5	100	0	0	0	0	0	0
GCA_001717085.1_ASM171708v1_genomic	GCA_001717085.1	Candidatus Verstraetearchaeota	Methanomethylicia	TACK	20	33.3	0	25	0	0	0	0	0	0	0
GCA_001717005.1_ASM171700v1_genomic	GCA_001717005.1	Candidatus Verstraetearchaeota	Methanomethylicia	TACK	60	50	0	37.5	100	0	0	0	50	0	0
GCA_001717015.1_ASM171701v1_genomic	GCA_001717015.1	Candidatus Verstraetearchaeota	Methanomethylicia	TACK	60	50	0	12.5	100	0	0	0	0	0	0
GCA_001717035.1_ASM171703v1_genomic	GCA_001717035.1	Candidatus Verstraetearchaeota	Methanomethylicia	TACK	60	50	0	37.5	100	0	0	0	50	0	0
GCA_022839705.1_ASM2283970v1_genomic	GCA_022839705.1	Candidatus Verstraetearchaeota	Methanomethylicia	TACK	80	50	0	25	100	0	0	0	0	0	0
GCA_002507395.1_ASM250739v1_genomic	GCA_002507395.1	Candidatus Verstraetearchaeota	Methanomethylicia	TACK	20	33.3	0	37.5	100	0	0	0	50	0	0
GCA_018053465.1_ASM1805346v1_genomic.fna.faa	GCA_018053465.1	Stenosarchaea group	Methanomicrobia	Eukyarchaea	60	50	0	12.5	100	0	0	0	0	0	0
GCA_002503885.1_ASM250388v1_genomic.fna.faa	GCA_002503885.1	Stenosarchaea group	Methanomicrobia	Eukyarchaea	80	50	0	12.5	100	0	0	0	50	0	0
GCA_003136075.1_20120700_E1X_genomic.fna.faa	GCA_003136075.1	Stenosarchaea group	Methanomicrobia	Eukyarchaea	80	50	0	0	100	0	0	0	0	0	0
GCA_001512375.1_ASM151237v1_genomic.fna.faa	GCA_001512375.1	Stenosarchaea group	Methanomicrobia	Eukyarchaea	80	50	0	0	100	0	0	0	50	0	0
GCA_002499905.1_ASM249990v1_genomic.fna.faa	GCA_002499905.1	Stenosarchaea group	Methanomicrobia	Eukyarchaea	80	50	0	0	100	0	0	0	0	0	0
GCA_013331415.1_ASM1333141v1_genomic.fna.faa	GCA_013331415.1	Stenosarchaea group	Methanomicrobia	Eukyarchaea	20	33.3	0	0	100	0	0	0	0	0	0
GCA_003153835.1_20120700_E3M_genomic.fna.faa	GCA_003153835.1	Stenosarchaea group	Methanomicrobia	Eukyarchaea	80	50	0	0	100	0	0	0	0	0	0
GCA_011620795.1_ASM1162079v1_genomic.fna.faa	GCA_011620795.1	Stenosarchaea group	Methanomicrobia	Eukyarchaea	80	50	0	12.5	100	0	0	0	0	0	0
GCA_002509545.1_ASM250954v1_genomic.fna.faa	GCA_002509545.1	Stenosarchaea group	Methanomicrobia	Eukyarchaea	60	50	0	12.5	100	0	0	0	0	0	0
GCA_002503105.1_ASM250310v1_genomic.fna.faa	GCA_002503105.1	Stenosarchaea group	Methanomicrobia	Eukyarchaea	80	50	0	0	100	0	0	0	0	0	0
GCA_015063105.1_ASM1506310v1_genomic.fna.faa	GCA_015063105.1	Stenosarchaea group	Methanomicrobia	Eukyarchaea	100	50	0	0	100	0	0	0	0	0	0
GCA_002502935.1_ASM250293v1_genomic.fna.faa	GCA_002502935.1	Stenosarchaea group	Methanomicrobia	Eukyarchaea	80	50	0	12.5	100	0	0	0	0	0	0
GCA_018263335.1_ASM1826333v1_genomic.fna.faa	GCA_018263335.1	Stenosarchaea group	Methanomicrobia	Eukyarchaea	80	50	0	0	100	0	0	0	0	0	0
GCA_016699325.1_ASM1669932v1_genomic.fna.faa	GCA_016699325.1	Stenosarchaea group	Methanomicrobia	Eukyarchaea	80	50	0	0	100	0	0	0	0	0	0
GCA_002508745.1_ASM250874v1_genomic.fna.faa	GCA_002508745.1	Stenosarchaea group	Methanomicrobia	Eukyarchaea	60	50	0	12.5	100	0	0	0	0	0	0
GCA_000327485.1_ASM32748v1_genomic.fna.faa	GCA_000327485.1	Stenosarchaea group	Methanomicrobia	Eukyarchaea	80	50	0	0	100	0	0	0	0	0	0
GCA_003170955.1_20110800_E1S_genomic.fna.faa	GCA_003170955.1	Stenosarchaea group	Methanomicrobia	Eukyarchaea	60	50	0	0	100	0	0	0	0	0	0
GCA_002839605.1_ASM283960v1_genomic.fna.faa	GCA_002839605.1	Stenosarchaea group	Methanomicrobia	Eukyarchaea	80	50	0	0	100	0	0	0	0	0	0
GCA_022710875.1_ASM2271087v1_genomic.fna.faa	GCA_022710875.1	Stenosarchaea group	Methanomicrobia	Eukyarchaea	20	33.3	0	0	100	0	0	0	0	0	0
GCA_001508695.1_ASM150869v1_genomic.fna.faa	GCA_001508695.1	Stenosarchaea group	Methanomicrobia	Eukyarchaea	80	50	0	0	100	0	0	0	50	0	0
GCA_022838145.1_ASM2283814v1_genomic.fna.faa	GCA_022838145.1	Stenosarchaea group	Methanomicrobia	Eukyarchaea	80	50	0	0	100	0	0	0	0	0	0
GCA_002498315.1_ASM249831v1_genomic.fna.faa	GCA_002498315.1	Stenosarchaea group	Methanomicrobia	Eukyarchaea	80	50	0	12.5	100	100	0	0	100	0	0
GCA_002498065.1_ASM249806v1_genomic.fna.faa	GCA_002498065.1	Stenosarchaea group	Methanomicrobia	Eukyarchaea	80	50	0	12.5	100	0	0	0	0	0	0
GCA_002499755.1_ASM249975v1_genomic.fna.faa	GCA_002499755.1	Stenosarchaea group	Methanomicrobia	Eukyarchaea	60	50	0	12.5	100	0	0	0	0	0	0
GCA_022711635.1_ASM2271163v1_genomic.fna.faa	GCA_022711635.1	Stenosarchaea group	Methanomicrobia	Eukyarchaea	60	50	0	0	100	0	0	0	0	0	0
GCA_016841295.1_ASM1684129v1_genomic.fna.faa	GCA_016841295.1	unclassified Euryarchaeota	Methanomicrobia	Eukyarchaea	80	50	0	12.5	100	0	0	0	0	0	0
GCA_002508765.1_ASM250876v1_genomic.fna.faa	GCA_002508765.1	Stenosarchaea group	Methanomicrobia	Eukyarchaea	60	50	0	12.5	100	0	0	0	0	0	0
GCA_002839575.1_ASM283957v1_genomic.fna.faa	GCA_002839575.1	Stenosarchaea group	Methanomicrobia	Eukyarchaea	80	50	0	12.5	100	100	0	0	0	0	0
GCA_002503825.1_ASM250382v1_genomic.fna.faa	GCA_002503825.1	Stenosarchaea group	Methanomicrobia	Eukyarchaea	80	50	0	12.5	100	0	0	0	0	0	0
GCA_022837745.1_ASM2283774v1_genomic.fna.faa	GCA_022837745.1	Stenosarchaea group	Methanomicrobia	Eukyarchaea	80	50	0	12.5	100	0	0	0	50	0	0
GCA_002499165.1_ASM249916v1_genomic.fna.faa	GCA_002499165.1	Stenosarchaea group	Methanomicrobia	Eukyarchaea	80	50	0	12.5	100	0	0	0	0	0	0
GCA_002508705.1_ASM250870v1_genomic.fna.faa	GCA_002508705.1	Stenosarchaea group	Methanomicrobia	Eukyarchaea	60	50	0	12.5	100	0	0	0	0	0	0
GCA_002497725.1_ASM249772v1_genomic.fna.faa	GCA_002497725.1	Stenosarchaea group	Methanomicrobia	Eukyarchaea	40	50	0	0	100	0	0	0	0	0	0
GCA_013331015.1_ASM1333101v1_genomic.fna.faa	GCA_013331015.1	Stenosarchaea group	Methanomicrobia	Eukyarchaea	20	33.3	0	0	0	0	0	0	0	0	0
GCA_002509345.1_ASM250934v1_genomic.fna.faa	GCA_002509345.1	Stenosarchaea group	Methanomicrobia	Eukyarchaea	80	33.3	0	0	0	0	0	0	0	0	0
GCA_002495775.1_ASM249577v1_genomic.fna.faa	GCA_002495775.1	Stenosarchaea group	Methanomicrobia	Eukyarchaea	80	50	0	0	100	0	0	0	0	0	0
GCA_002496135.1_ASM249613v1_genomic.fna.faa	GCA_002496135.1	Stenosarchaea group	Methanomicrobia	Eukyarchaea	80	50	0	12.5	100	0	0	0	0	0	0
GCA_002508675.1_ASM250867v1_genomic.fna.faa	GCA_002508675.1	Stenosarchaea group	Methanomicrobia	Eukyarchaea	60	50	0	12.5	100	0	0	0	0	0	0
GCA_001602685.1_ASM160268v1_genomic.fna.faa	GCA_001602685.1	Stenosarchaea group	Methanomicrobia	Eukyarchaea	80	50	0	12.5	100	0	0	0	50	0	0
GCA_002506145.1_ASM250614v1_genomic.fna.faa	GCA_002506145.1	Stenosarchaea group	Methanomicrobia	Eukyarchaea	20	50	0	0	100	0	0	0	0	0	0
GCA_003135915.1_20110800_E1S_genomic.fna.faa	GCA_003135915.1	Stenosarchaea group	Methanomicrobia	Eukyarchaea	80	50	0	0	0	0	0	0	0	0	0
GCA_000015765.1_ASM1576v1_genomic.fna.faa	GCA_000015765.1	Stenosarchaea group	Methanomicrobia	Eukyarchaea	80	50	0	0	100	0	0	0	100	0	0
GCA_001602695.1_ASM160269v1_genomic.fna.faa	GCA_001602695.1	Stenosarchaea group	Methanomicrobia	Eukyarchaea	80	33.3	0	0	100	0	0	0	0	0	0
GCA_022841205.1_ASM2284120v1_genomic.fna.faa	GCA_022841205.1	Stenosarchaea group	Methanomicrobia	Eukyarchaea	80	50	0	0	100	0	0	0	0	0	0
GCA_022839115.1_ASM2283911v1_genomic.fna.faa	GCA_022839115.1	Stenosarchaea group	Methanomicrobia	Eukyarchaea	80	50	0	12.5	0	0	0	0	50	0	0
GCA_002502735.1_ASM250273v1_genomic.fna.faa	GCA_002502735.1	Stenosarchaea group	Methanomicrobia	Eukyarchaea	60	50	0	25	100	0	0	0	0	0	0
GCA_013329165.1_ASM1332916v1_genomic.fna.faa	GCA_013329165.1	Stenosarchaea group	Methanomicrobia	Eukyarchaea	80	50	0	0	100	0	0	0	0	0	0
GCA_020431445.1_ASM2043144v1_genomic.fna.faa	GCA_020431445.1	Stenosarchaea group	Methanomicrobia	Eukyarchaea	100	50	0	0	100	0	0	0	0	0	0
GCA_002496255.1_ASM249625v1_genomic.fna.faa	GCA_002496255.1	Stenosarchaea group	Methanomicrobia	Eukyarchaea	80	50	0	12.5	100	0	0	0	50	0	0
GCA_022840425.1_ASM2284042v1_genomic.fna.faa	GCA_022840425.1	Stenosarchaea group	Methanomicrobia	Eukyarchaea	40	33.3	0	12.5	100	0	0	0	50	0	0
GCA_023228255.1_ASM2322825v1_genomic.fna.faa	GCA_023228255.1	Stenosarchaea group	Methanomicrobia	Eukyarchaea	20	33.3	0	0	100	0	0	0	0	0	0
GCA_017994735.1_ASM1799473v1_genomic.fna.faa	GCA_017994735.1	Stenosarchaea group	Methanomicrobia	Eukyarchaea	20	33.3	0	12.5	100	0	0	0	0	0	0
GCA_023249515.1_ASM2324951v1_genomic.fna.faa	GCA_023249515.1	Stenosarchaea group	Methanomicrobia	Eukyarchaea	60	50	0	0	100	0	0	0	0	0	0
GCA_002839645.1_ASM283964v1_genomic.fna.faa	GCA_002839645.1	Stenosarchaea group	Methanomicrobia	Eukyarchaea	80	50	0	12.5	100	0	0	0	0	0	0
GCA_002502245.1_ASM250224v1_genomic.fna.faa	GCA_002502245.1	Stenosarchaea group	Methanomicrobia	Eukyarchaea	20	33.3	0	0	100	0	0	0	0	0	0
GCA_002839625.1_ASM283962v1_genomic.fna.faa	GCA_002839625.1	Stenosarchaea group	Methanomicrobia	Eukyarchaea	20	0	0	0	100	0	0	0	0	0	0
GCA_002501655.1_ASM250165v1_genomic.fna.faa	GCA_002501655.1	Stenosarchaea group	Methanomicrobia	Eukyarchaea	80	50	0	12.5	100	0	0	0	50	0	0
GCA_900036045.1_Methanoculleus_sp_MAB1_genomic.fna.faa	GCA_900036045.1	Stenosarchaea group	Methanomicrobia	Eukyarchaea	80	50	0	12.5	100	0	0	0	50	0	0
GCA_900025055.1_Methanoculleus_bin_genome_genomic.fna.faa	GCA_900025055.1	Stenosarchaea group	Methanomicrobia	Eukyarchaea	80	50	0	0	100	0	0	0	50	0	0
GCA_019669965.1_ASM1966996v1_genomic.fna.faa	GCA_019669965.1	Stenosarchaea group	Methanomicrobia	Eukyarchaea	80	50	0	12.5	100	0	0	0	0	0	0
GCA_002506585.1_ASM250658v1_genomic.fna.faa	GCA_002506585.1	Stenosarchaea group	Methanomicrobia	Eukyarchaea	80	50	0	12.5	100	100	0	0	50	0	0
GCA_013329555.1_ASM1332955v1_genomic.fna.faa	GCA_013329555.1	Stenosarchaea group	Methanomicrobia	Eukyarchaea	60	33.3	0	12.5	100	0	0	0	0	0	0
GCA_002501965.1_ASM250196v1_genomic.fna.faa	GCA_002501965.1	Stenosarchaea group	Methanomicrobia	Eukyarchaea	20	33.3	0	0	100	0	0	0	0	0	0
GCA_019137145.1_ASM1913714v1_genomic.fna.faa	GCA_019137145.1	Stenosarchaea group	Methanomicrobia	Eukyarchaea	80	50	0	12.5	100	0	0	0	100	0	0
GCA_022710385.1_ASM2271038v1_genomic.fna.faa	GCA_022710385.1	Stenosarchaea group	Methanomicrobia	Eukyarchaea	40	50	0	0	100	0	0	0	0	0	0
GCA_003170975.1_20110800_E1M_genomic.fna.faa	GCA_003170975.1	Stenosarchaea group	Methanomicrobia	Eukyarchaea	60	50	0	0	100	0	0	0	0	0	0
GCA_002839675.1_ASM283967v1_genomic.fna.faa	GCA_002839675.1	Stenosarchaea group	Methanomicrobia	Eukyarchaea	80	50	0	0	100	0	0	0	0	0	0
GCA_002497445.1_ASM249744v1_genomic.fna.faa	GCA_002497445.1	Stenosarchaea group	Methanomicrobia	Eukyarchaea	20	50	0	0	0	0	0	0	0	0	0
GCA_002508495.1_ASM250849v1_genomic.fna.faa	GCA_002508495.1	Stenosarchaea group	Methanomicrobia	Eukyarchaea	80	33.3	0	0	0	0	0	0	0	0	0
GCA_013336125.1_ASM1333612v1_genomic.fna.faa	GCA_013336125.1	Stenosarchaea group	Methanomicrobia	Eukyarchaea	60	50	0	0	100	100	0	0	0	0	0
GCA_001940805.1_ASM194080v1_genomic.fna.faa	GCA_001940805.1	Stenosarchaea group	Methanomicrobia	Eukyarchaea	80	50	0	0	100	0	0	0	0	0	0
GCA_002502815.1_ASM250281v1_genomic.fna.faa	GCA_002502815.1	Stenosarchaea group	Methanomicrobia	Eukyarchaea	80	50	0	0	100	0	0	0	0	0	0
GCA_002839585.1_ASM283958v1_genomic.fna.faa	GCA_002839585.1	Stenosarchaea group	Methanomicrobia	Eukyarchaea	0	0	0	0	0	0	0	0	0	0	0
GCA_002509495.1_ASM250949v1_genomic.fna.faa	GCA_002509495.1	Stenosarchaea group	Methanomicrobia	Eukyarchaea	80	50	0	0	100	0	0	0	0	0	0
GCA_002498375.1_ASM249837v1_genomic.fna.faa	GCA_002498375.1	Stenosarchaea group	Methanomicrobia	Eukyarchaea	80	50	0	0	100	0	0	0	100	0	0
GCA_022710665.1_ASM2271066v1_genomic.fna.faa	GCA_022710665.1	Stenosarchaea group	Methanomicrobia	Eukyarchaea	80	50	0	0	100	0	0	0	0	0	0
GCA_017999755.1_ASM1799975v1_genomic.fna.faa	GCA_017999755.1	Stenosarchaea group	Methanomicrobia	Eukyarchaea	20	16.7	0	0	0	0	0	0	0	0	0
GCA_001508665.1_ASM150866v1_genomic.fna.faa	GCA_001508665.1	Stenosarchaea group	Methanomicrobia	Eukyarchaea	80	50	0	12.5	100	0	0	0	50	0	0
GCA_022839005.1_ASM2283900v1_genomic.fna.faa	GCA_022839005.1	Stenosarchaea group	Methanomicrobia	Eukyarchaea	80	50	0	12.5	100	0	0	0	50	0	0
GCA_002502975.1_ASM250297v1_genomic.fna.faa	GCA_002502975.1	Stenosarchaea group	Methanomicrobia	Eukyarchaea	60	33.3	0	12.5	100	0	0	0	0	0	0
GCA_013331215.1_ASM1333121v1_genomic.fna.faa	GCA_013331215.1	Stenosarchaea group	Methanomicrobia	Eukyarchaea	20	50	0	0	100	0	0	0	0	0	0
GCA_002495225.1_ASM249522v1_genomic.fna.faa	GCA_002495225.1	Stenosarchaea group	Methanomicrobia	Eukyarchaea	60	50	0	0	100	100	0	0	0	0	0
GCA_017994915.1_ASM1799491v1_genomic.fna.faa	GCA_017994915.1	Stenosarchaea group	Methanomicrobia	Eukyarchaea	80	50	0	12.5	100	0	0	0	50	0	0
GCA_002495065.1_ASM249506v1_genomic.fna.faa	GCA_002495065.1	Stenosarchaea group	Methanomicrobia	Eukyarchaea	80	50	0	0	100	0	0	0	0	0	0
GCA_003154335.1_20120700_E2X_genomic.fna.faa	GCA_003154335.1	Stenosarchaea group	Methanomicrobia	Eukyarchaea	80	50	0	0	100	0	0	0	0	0	0
GCA_000430905.1_ASM43090v1_genomic.fna.faa	GCA_000430905.1	Stenosarchaea group	Methanomicrobia	Eukyarchaea	80	50	0	0	100	0	0	0	0	0	0
GCA_900079125.1_MBBA_genomic.fna.faa	GCA_900079125.1	Stenosarchaea group	Methanomicrobia	Eukyarchaea	80	50	0	12.5	100	0	0	0	50	0	0
GCA_002503525.1_ASM250352v1_genomic.fna.faa	GCA_002503525.1	Stenosarchaea group	Methanomicrobia	Eukyarchaea	80	50	0	12.5	100	0	0	0	50	0	0
GCA_002508725.1_ASM250872v1_genomic.fna.faa	GCA_002508725.1	Stenosarchaea group	Methanomicrobia	Eukyarchaea	60	50	0	12.5	100	0	0	0	0	0	0
GCA_022838325.1_ASM2283832v1_genomic.fna.faa	GCA_022838325.1	Stenosarchaea group	Methanomicrobia	Eukyarchaea	80	50	0	12.5	100	0	0	0	50	0	0
GCA_002495055.1_ASM249505v1_genomic.fna.faa	GCA_002495055.1	Stenosarchaea group	Methanomicrobia	Eukyarchaea	40	50	0	0	100	0	0	0	0	0	0
GCA_002499455.1_ASM249945v1_genomic.fna.faa	GCA_002499455.1	Stenosarchaea group	Methanomicrobia	Eukyarchaea	60	33.3	0	12.5	100	100	0	0	0	0	0
GCA_002509565.1_ASM250956v1_genomic.fna.faa	GCA_002509565.1	Stenosarchaea group	Methanomicrobia	Eukyarchaea	60	50	0	12.5	100	0	0	0	0	0	0
GCA_001017125.1_ASM101712v1_genomic.fna.faa	GCA_001017125.1	Stenosarchaea group	Methanomicrobia	Eukyarchaea	80	50	0	12.5	100	100	0	0	0	0	0
GCA_016841665.1_ASM1684166v1_genomic.fna.faa	GCA_016841665.1	unclassified Euryarchaeota	Methanomicrobia	Eukyarchaea	80	50	0	0	100	0	0	0	0	0	0
GCA_022838645.1_ASM2283864v1_genomic.fna.faa	GCA_022838645.1	Stenosarchaea group	Methanomicrobia	Eukyarchaea	80	50	0	12.5	0	0	0	0	50	0	0
GCA_002496855.1_ASM249685v1_genomic.fna.faa	GCA_002496855.1	Stenosarchaea group	Methanomicrobia	Eukyarchaea	60	33.3	0	12.5	100	0	0	0	0	0	0
GCA_002498825.1_ASM249882v1_genomic.fna.faa	GCA_002498825.1	Stenosarchaea group	Methanomicrobia	Eukyarchaea	60	33.3	0	12.5	100	0	0	0	0	0	0
GCA_018132105.1_ASM1813210v1_genomic.fna.faa	GCA_018132105.1	Stenosarchaea group	Methanomicrobia	Eukyarchaea	100	50	0	0	100	100	0	0	100	0	0
GCA_015063085.1_ASM1506308v1_genomic.fna.faa	GCA_015063085.1	Stenosarchaea group	Methanomicrobia	Eukyarchaea	20	50	0	0	100	0	0	0	0	0	0
GCA_013335855.1_ASM1333585v1_genomic.fna.faa	GCA_013335855.1	Stenosarchaea group	Methanomicrobia	Eukyarchaea	60	50	0	12.5	100	0	0	0	0	0	0
GCA_002498705.1_ASM249870v1_genomic.fna.faa	GCA_002498705.1	Stenosarchaea group	Methanomicrobia	Eukyarchaea	80	50	0	0	100	0	0	0	100	0	0
GCA_002498025.1_ASM249802v1_genomic.fna.faa	GCA_002498025.1	Stenosarchaea group	Methanomicrobia	Eukyarchaea	60	50	0	12.5	100	0	0	0	0	0	0
GCA_002509575.1_ASM250957v1_genomic.fna.faa	GCA_002509575.1	Stenosarchaea group	Methanomicrobia	Eukyarchaea	60	50	0	0	100	0	0	0	0	0	0
GCA_019136335.1_ASM1913633v1_genomic.fna.faa	GCA_019136335.1	Stenosarchaea group	Methanomicrobia	Eukyarchaea	60	33.3	0	12.5	100	0	0	0	0	0	0
GCA_003157895.1_20120600_E1D_genomic.fna.faa	GCA_003157895.1	Stenosarchaea group	Methanomicrobia	Eukyarchaea	60	50	0	0	100	0	0	0	0	0	0
GCA_017997385.1_ASM1799738v1_genomic.fna.faa	GCA_017997385.1	Stenosarchaea group	Methanomicrobia	Eukyarchaea	80	33.3	0	12.5	100	0	0	0	0	0	0
GCA_002497485.1_ASM249748v1_genomic.fna.faa	GCA_002497485.1	Stenosarchaea group	Methanomicrobia	Eukyarchaea	20	50	0	0	100	0	0	0	0	0	0
GCA_002506785.1_ASM250678v1_genomic.fna.faa	GCA_002506785.1	Stenosarchaea group	Methanomicrobia	Eukyarchaea	80	50	0	0	100	0	0	0	0	0	0
GCA_002497785.1_ASM249778v1_genomic.fna.faa	GCA_002497785.1	Stenosarchaea group	Methanomicrobia	Eukyarchaea	80	50	0	0	100	0	0	0	0	0	0
GCA_000147875.1_ASM14787v1_genomic.fna.faa	GCA_000147875.1	Stenosarchaea group	Methanomicrobia	Eukyarchaea	80	50	0	25	100	0	0	0	0	0	0
GCA_000021965.1_ASM2196v1_genomic.fna.faa	GCA_000021965.1	Stenosarchaea group	Methanomicrobia	Eukyarchaea	80	50	0	0	100	0	0	0	0	0	0
GCA_000017625.1_ASM1762v1_genomic.fna.faa	GCA_000017625.1	Stenosarchaea group	Methanomicrobia	Eukyarchaea	80	50	0	12.5	100	0	0	0	0	0	0
GCA_002503135.1_ASM250313v1_genomic.fna.faa	GCA_002503135.1	Stenosarchaea group	Methanomicrobia	Eukyarchaea	80	50	0	0	100	0	0	0	0	0	0
GCA_000784355.1_Metpay_genomic.fna.faa	GCA_000784355.1	Stenosarchaea group	Methanomicrobia	Eukyarchaea	80	50	0	12.5	100	0	0	0	0	0	0
GCA_002498295.1_ASM249829v1_genomic.fna.faa	GCA_002498295.1	Stenosarchaea group	Methanomicrobia	Eukyarchaea	20	50	0	0	100	0	0	0	0	0	0
GCA_019633745.1_ASM1963374v1_genomic.fna.faa	GCA_019633745.1	Stenosarchaea group	Methanomicrobia	Eukyarchaea	80	50	0	12.5	100	100	0	0	50	0	0
GCA_000013445.1_ASM1344v1_genomic.fna.faa	GCA_000013445.1	Stenosarchaea group	Methanomicrobia	Eukyarchaea	80	50	0	12.5	100	0	0	0	0	0	0
GCA_004102725.1_ASM410272v1_genomic.fna.faa	GCA_004102725.1	Stenosarchaea group	Methanomicrobia	Eukyarchaea	80	50	0	0	100	100	0	0	0	0	0
GCA_002509485.1_ASM250948v1_genomic.fna.faa	GCA_002509485.1	Stenosarchaea group	Methanomicrobia	Eukyarchaea	20	50	0	0	100	0	0	0	0	0	0
GCA_002506085.1_ASM250608v1_genomic.fna.faa	GCA_002506085.1	Stenosarchaea group	Methanomicrobia	Eukyarchaea	80	50	0	0	100	0	0	0	50	0	0
GCA_016841485.1_ASM1684148v1_genomic.fna.faa	GCA_016841485.1	unclassified Euryarchaeota	Methanomicrobia	Eukyarchaea	80	50	0	0	100	100	0	0	100	0	0
GCA_002508665.1_ASM250866v1_genomic.fna.faa	GCA_002508665.1	Stenosarchaea group	Methanomicrobia	Eukyarchaea	60	50	0	12.5	100	0	0	0	0	0	0
GCA_019263745.1_ASM1926374v1_genomic.fna.faa	GCA_019263745.1	Stenosarchaea group	Methanomicrobia	Eukyarchaea	80	50	0	12.5	100	0	0	0	0	0	0
GCA_000304355.2_Mb_MS2_genomic.fna.faa	GCA_000304355.2	Stenosarchaea group	Methanomicrobia	Eukyarchaea	80	50	0	12.5	100	0	0	0	50	0	0
GCA_016841385.1_ASM1684138v1_genomic.fna.faa	GCA_016841385.1	unclassified Euryarchaeota	Methanomicrobia	Eukyarchaea	80	50	0	12.5	100	100	0	0	0	0	0
GCA_016841955.1_ASM1684195v1_genomic.fna.faa	GCA_016841955.1	unclassified Euryarchaeota	Methanomicrobia	Eukyarchaea	80	50	0	12.5	100	0	0	0	0	0	0
GCA_000243255.1_ASM24325v1_genomic.fna.faa	GCA_000243255.1	Stenosarchaea group	Methanomicrobia	Eukyarchaea	80	50	0	12.5	100	0	0	0	50	0	0
GCA_002499025.1_ASM249902v1_genomic.fna.faa	GCA_002499025.1	Stenosarchaea group	Methanomicrobia	Eukyarchaea	20	33.3	0	0	100	0	0	0	0	0	0
GCA_003170075.1_20110800_E3D_genomic.fna.faa	GCA_003170075.1	Stenosarchaea group	Methanomicrobia	Eukyarchaea	80	50	0	12.5	100	0	0	0	0	0	0
GCA_002508805.1_ASM250880v1_genomic.fna.faa	GCA_002508805.1	Stenosarchaea group	Methanomicrobia	Eukyarchaea	60	50	0	12.5	100	0	0	0	0	0	0
GCA_000015825.1_ASM1582v1_genomic.fna.faa	GCA_000015825.1	Stenosarchaea group	Methanomicrobia	Eukyarchaea	80	50	0	12.5	100	100	0	0	0	0	0
GCA_003141335.1_20120800_E3X_genomic.fna.faa	GCA_003141335.1	Stenosarchaea group	Methanomicrobia	Eukyarchaea	80	50	0	0	100	0	0	0	0	0	0
GCA_002496755.1_ASM249675v1_genomic.fna.faa	GCA_002496755.1	Stenosarchaea group	Methanomicrobia	Eukyarchaea	60	50	0	12.5	0	0	0	0	0	0	0
GCA_022838945.1_ASM2283894v1_genomic.fna.faa	GCA_022838945.1	Stenosarchaea group	Methanomicrobia	Eukyarchaea	80	50	0	0	100	0	0	0	0	0	0
GCA_013331225.1_ASM1333122v1_genomic.fna.faa	GCA_013331225.1	Stenosarchaea group	Methanomicrobia	Eukyarchaea	60	50	0	0	100	0	0	0	0	0	0
GCA_002506105.1_ASM250610v1_genomic.fna.faa	GCA_002506105.1	Stenosarchaea group	Methanomicrobia	Eukyarchaea	60	50	0	12.5	100	0	0	0	0	0	0
GCA_022840325.1_ASM2284032v1_genomic.fna.faa	GCA_022840325.1	Stenosarchaea group	Methanomicrobia	Eukyarchaea	80	50	0	12.5	100	0	0	0	50	0	0
GCA_023228295.1_ASM2322829v1_genomic.fna.faa	GCA_023228295.1	Stenosarchaea group	Methanomicrobia	Eukyarchaea	40	50	0	12.5	100	0	0	0	0	0	0
GCA_002497965.1_ASM249796v1_genomic.fna.faa	GCA_002497965.1	Stenosarchaea group	Methanomicrobia	Eukyarchaea	60	50	0	12.5	100	0	0	0	0	0	0
GCA_002508775.1_ASM250877v1_genomic.fna.faa	GCA_002508775.1	Stenosarchaea group	Methanomicrobia	Eukyarchaea	60	50	0	12.5	100	0	0	0	0	0	0
GCA_017996475.1_ASM1799647v1_genomic.fna.faa	GCA_017996475.1	Stenosarchaea group	Methanomicrobia	Eukyarchaea	20	50	0	12.5	0	0	0	0	100	0	0
GCA_002499825.1_ASM249982v1_genomic.fna.faa	GCA_002499825.1	Stenosarchaea group	Methanomicrobia	Eukyarchaea	60	33.3	0	12.5	100	0	0	0	0	0	0
GCA_002509505.1_ASM250950v1_genomic.fna.faa	GCA_002509505.1	Stenosarchaea group	Methanomicrobia	Eukyarchaea	60	50	0	12.5	100	0	0	0	0	0	0
GCA_011620885.1_ASM1162088v1_genomic.fna.faa	GCA_011620885.1	Stenosarchaea group	Methanomicrobia	Eukyarchaea	80	50	0	0	100	0	0	0	0	0	0
GCA_019136755.1_ASM1913675v1_genomic.fna.faa	GCA_019136755.1	Stenosarchaea group	Methanomicrobia	Eukyarchaea	80	50	0	12.5	100	0	0	0	0	0	0
GCA_013329715.1_ASM1332971v1_genomic.fna.faa	GCA_013329715.1	Methanopyri	Methanopyri	Eukyarchaea	20	50	0	12.5	100	0	0	0	50	0	0
GCA_000007185.1_ASM718v1_genomic.fna.faa	GCA_000007185.1	Methanopyri	Methanopyri	Eukyarchaea	80	50	0	12.5	100	0	0	0	50	0	0
GCA_002201895.1_ASM220189v1_genomic.fna.faa	GCA_002201895.1	Methanopyri	Methanopyri	Eukyarchaea	80	50	0	12.5	100	0	0	0	50	0	0
GCA_002201915.1_ASM220191v1_genomic.fna.faa	GCA_002201915.1	Methanopyri	Methanopyri	Eukyarchaea	80	50	0	12.5	100	0	0	0	50	0	0
GCA_022839835.1_ASM2283983v1_genomic.fna.faa	GCA_022839835.1	Stenosarchaea group	Methanosarcinia	Eukyarchaea	100	50	0	0	100	0	0	0	0	0	0
GCA_023229265.1_ASM2322926v1_genomic.fna.faa	GCA_023229265.1	Stenosarchaea group	Methanosarcinia	Eukyarchaea	100	50	0	0	100	0	0	0	0	0	0
GCA_002508505.1_ASM250850v1_genomic.fna.faa	GCA_002508505.1	Stenosarchaea group	Methanosarcinia	Eukyarchaea	80	33.3	0	12.5	100	0	0	0	50	33.3	0
GCA_020804205.1_ASM2080420v1_genomic.fna.faa	GCA_020804205.1	Stenosarchaea group	Methanosarcinia	Eukyarchaea	80	50	0	12.5	100	0	0	0	0	0	0
GCA_002505805.1_ASM250580v1_genomic.fna.faa	GCA_002505805.1	Stenosarchaea group	Methanosarcinia	Eukyarchaea	100	50	0	0	100	0	0	0	100	0	0
GCA_000969925.1_ASM96992v1_genomic.fna.faa	GCA_000969925.1	Stenosarchaea group	Methanosarcinia	Eukyarchaea	80	50	0	12.5	100	0	0	0	50	0	0
GCA_020685265.1_ASM2068526v1_genomic.fna.faa	GCA_020685265.1	Stenosarchaea group	Methanosarcinia	Eukyarchaea	80	50	0	0	100	0	0	0	0	0	0
GCA_005485005.1_ASM548500v1_genomic.fna.faa	GCA_005485005.1	Stenosarchaea group	Methanosarcinia	Eukyarchaea	80	50	0	12.5	100	0	0	0	0	0	0
GCA_002503445.1_ASM250344v1_genomic.fna.faa	GCA_002503445.1	Stenosarchaea group	Methanosarcinia	Eukyarchaea	100	50	0	0	100	0	0	0	0	0	0
GCA_002508635.1_ASM250863v1_genomic.fna.faa	GCA_002508635.1	Stenosarchaea group	Methanosarcinia	Eukyarchaea	80	50	0	12.5	100	0	0	0	50	0	0
GCA_000007345.1_ASM734v1_genomic.fna.faa	GCA_000007345.1	Stenosarchaea group	Methanosarcinia	Eukyarchaea	80	50	0	12.5	100	0	0	0	50	0	0
GCA_000306725.1_ASM30672v1_genomic.fna.faa	GCA_000306725.1	Stenosarchaea group	Methanosarcinia	Eukyarchaea	80	50	0	12.5	100	0	0	0	0	0	0
GCA_013329415.1_ASM1332941v1_genomic.fna.faa	GCA_013329415.1	Stenosarchaea group	Methanosarcinia	Eukyarchaea	80	50	0	12.5	100	0	0	0	0	0	0
GCA_002495565.1_ASM249556v1_genomic.fna.faa	GCA_002495565.1	Stenosarchaea group	Methanosarcinia	Eukyarchaea	80	50	0	12.5	100	0	0	0	50	33.3	0
GCA_004211975.1_ASM421197v1_genomic.fna.faa	GCA_004211975.1	Stenosarchaea group	Methanosarcinia	Eukyarchaea	100	33.3	0	12.5	100	0	0	0	0	0	0
GCA_000979375.1_gtlEnvA5udCFS_genomic.fna.faa	GCA_000979375.1	Stenosarchaea group	Methanosarcinia	Eukyarchaea	80	50	0	12.5	100	0	0	0	0	0	0
GCA_000978955.1_gtlEnvA5udCFS_genomic.fna.faa	GCA_000978955.1	Stenosarchaea group	Methanosarcinia	Eukyarchaea	80	50	0	12.5	100	0	0	0	50	0	0
GCA_000980075.1_gtlEnvA5udCFS_genomic.fna.faa	GCA_000980075.1	Stenosarchaea group	Methanosarcinia	Eukyarchaea	80	50	0	12.5	100	0	0	0	0	0	0
GCA_002496325.1_ASM249632v1_genomic.fna.faa	GCA_002496325.1	Stenosarchaea group	Methanosarcinia	Eukyarchaea	60	50	0	25	100	0	0	0	0	0	0
GCA_000235565.1_ASM23556v1_genomic.fna.faa	GCA_000235565.1	Stenosarchaea group	Methanosarcinia	Eukyarchaea	100	50	0	0	100	0	0	0	100	0	0
GCA_003584605.1_ASM358460v1_genomic.fna.faa	GCA_003584605.1	Stenosarchaea group	Methanosarcinia	Eukyarchaea	80	50	0	12.5	100	0	0	0	0	0	0
GCA_002503595.1_ASM250359v1_genomic.fna.faa	GCA_002503595.1	Stenosarchaea group	Methanosarcinia	Eukyarchaea	100	50	0	12.5	100	0	0	0	0	0	0
GCA_016841785.1_ASM1684178v1_genomic.fna.faa	GCA_016841785.1	unclassified Euryarchaeota	Methanosarcinia	Eukyarchaea	80	50	0	12.5	100	0	0	0	0	0	0
GCA_000979125.1_gtlEnvA5udCFS_genomic.fna.faa	GCA_000979125.1	Stenosarchaea group	Methanosarcinia	Eukyarchaea	80	50	0	12.5	100	0	0	0	50	0	0
GCA_016841625.1_ASM1684162v1_genomic.fna.faa	GCA_016841625.1	unclassified Euryarchaeota	Methanosarcinia	Eukyarchaea	60	50	0	12.5	100	0	0	0	50	0	0
GCA_000970145.1_ASM97014v1_genomic.fna.faa	GCA_000970145.1	Stenosarchaea group	Methanosarcinia	Eukyarchaea	80	50	0	12.5	100	0	0	0	50	0	0
GCA_000979925.1_gtlEnvA5udCFS_genomic.fna.faa	GCA_000979925.1	Stenosarchaea group	Methanosarcinia	Eukyarchaea	80	50	0	12.5	100	0	0	0	0	0	0
GCA_020724545.1_ASM2072454v1_genomic.fna.faa	GCA_020724545.1	Stenosarchaea group	Methanosarcinia	Eukyarchaea	60	50	0	25	100	0	0	0	0	33.3	0
GCA_002496085.1_ASM249608v1_genomic.fna.faa	GCA_002496085.1	Stenosarchaea group	Methanosarcinia	Eukyarchaea	100	50	0	0	100	0	0	0	0	0	0
GCA_003157915.1_20120600_E1D_genomic.fna.faa	GCA_003157915.1	Stenosarchaea group	Methanosarcinia	Eukyarchaea	80	50	0	0	100	0	0	0	0	0	0
GCA_000979755.1_gtlEnvA5udCFS_genomic.fna.faa	GCA_000979755.1	Stenosarchaea group	Methanosarcinia	Eukyarchaea	80	50	0	12.5	100	0	0	0	50	0	0
GCA_000979585.1_gtlEnvA5udCFS_genomic.fna.faa	GCA_000979585.1	Stenosarchaea group	Methanosarcinia	Eukyarchaea	80	50	0	12.5	100	0	0	0	50	0	0
GCA_000970165.1_ASM97016v1_genomic.fna.faa	GCA_000970165.1	Stenosarchaea group	Methanosarcinia	Eukyarchaea	80	50	0	12.5	100	0	0	0	50	0	0
GCA_000978935.1_gtlEnvA5udCFS_genomic.fna.faa	GCA_000978935.1	Stenosarchaea group	Methanosarcinia	Eukyarchaea	80	50	0	12.5	100	0	0	0	50	0	0
GCA_001509375.1_ASM150937v1_genomic.fna.faa	GCA_001509375.1	Stenosarchaea group	Methanosarcinia	Eukyarchaea	100	50	0	0	100	0	0	0	0	0	0
GCA_000980055.1_gtlEnvA5udCFS_genomic.fna.faa	GCA_000980055.1	Stenosarchaea group	Methanosarcinia	Eukyarchaea	80	50	0	12.5	100	0	0	0	0	0	0
GCA_000969945.1_ASM96994v1_genomic.fna.faa	GCA_000969945.1	Stenosarchaea group	Methanosarcinia	Eukyarchaea	80	50	0	12.5	100	0	0	0	50	0	0
GCA_002503455.1_ASM250345v1_genomic.fna.faa	GCA_002503455.1	Stenosarchaea group	Methanosarcinia	Eukyarchaea	20	50	0	12.5	100	0	0	0	50	0	0
GCA_001602645.1_ASM160264v1_genomic.fna.faa	GCA_001602645.1	Stenosarchaea group	Methanosarcinia	Eukyarchaea	100	50	0	12.5	100	0	0	0	100	0	0
GCA_000979765.1_gtlEnvA5udCFS_genomic.fna.faa	GCA_000979765.1	Stenosarchaea group	Methanosarcinia	Eukyarchaea	80	50	0	12.5	100	0	0	0	0	0	0
GCA_002505485.1_ASM250548v1_genomic.fna.faa	GCA_002505485.1	Stenosarchaea group	Methanosarcinia	Eukyarchaea	80	50	0	12.5	100	0	0	0	0	0	0
GCA_000980085.1_gtlEnvA5udCFS_genomic.fna.faa	GCA_000980085.1	Stenosarchaea group	Methanosarcinia	Eukyarchaea	80	50	0	12.5	100	0	0	0	0	0	0
GCA_000979275.1_gtlEnvA5udCFS_genomic.fna.faa	GCA_000979275.1	Stenosarchaea group	Methanosarcinia	Eukyarchaea	80	50	0	12.5	100	0	0	0	0	0	0
GCA_002507265.1_ASM250726v1_genomic.fna.faa	GCA_002507265.1	Stenosarchaea group	Methanosarcinia	Eukyarchaea	80	50	0	0	100	0	0	0	0	0	0
GCA_013572335.1_ASM1357233v1_genomic.fna.faa	GCA_013572335.1	Stenosarchaea group	Methanosarcinia	Eukyarchaea	80	50	0	25	100	0	0	0	50	0	0
GCA_020844815.1_ASM2084481v1_genomic.fna.faa	GCA_020844815.1	Stenosarchaea group	Methanosarcinia	Eukyarchaea	80	50	0	12.5	100	0	0	0	0	0	0
GCA_000979175.1_gtlEnvA5udCFS_genomic.fna.faa	GCA_000979175.1	Stenosarchaea group	Methanosarcinia	Eukyarchaea	80	50	0	12.5	100	0	0	0	0	0	0
GCA_000970005.1_ASM97000v1_genomic.fna.faa	GCA_000970005.1	Stenosarchaea group	Methanosarcinia	Eukyarchaea	80	50	0	12.5	100	0	0	0	0	33.3	0
GCA_002507065.1_ASM250706v1_genomic.fna.faa	GCA_002507065.1	Stenosarchaea group	Methanosarcinia	Eukyarchaea	80	50	0	12.5	100	0	0	0	50	0	0
GCA_023544565.1_ASM2354456v1_genomic.fna.faa	GCA_023544565.1	Stenosarchaea group	Methanosarcinia	Eukyarchaea	60	50	0	12.5	100	0	0	0	0	0	0
GCA_022837565.1_ASM2283756v1_genomic.fna.faa	GCA_022837565.1	Stenosarchaea group	Methanosarcinia	Eukyarchaea	100	50	0	0	100	0	0	0	50	0	0
GCA_000979635.1_gtlEnvA5udCFS_genomic.fna.faa	GCA_000979635.1	Stenosarchaea group	Methanosarcinia	Eukyarchaea	80	50	0	12.5	100	0	0	0	0	0	0
GCA_000979895.1_gtlEnvA5udCFS_genomic.fna.faa	GCA_000979895.1	Stenosarchaea group	Methanosarcinia	Eukyarchaea	80	50	0	12.5	100	0	0	0	50	0	0
GCA_000979035.1_gtlEnvA5udCFS_genomic.fna.faa	GCA_000979035.1	Stenosarchaea group	Methanosarcinia	Eukyarchaea	80	50	0	12.5	100	0	0	0	0	0	0
GCA_002503085.1_ASM250308v1_genomic.fna.faa	GCA_002503085.1	Stenosarchaea group	Methanosarcinia	Eukyarchaea	100	50	0	0	100	0	0	0	0	0	0
GCA_014237115.1_ASM1423711v1_genomic.fna.faa	GCA_014237115.1	Stenosarchaea group	Methanosarcinia	Eukyarchaea	80	50	0	12.5	100	0	0	0	50	0	0
GCA_002506845.1_ASM250684v1_genomic.fna.faa	GCA_002506845.1	Stenosarchaea group	Methanosarcinia	Eukyarchaea	80	50	0	12.5	100	0	0	0	50	0	0
GCA_023544605.1_ASM2354460v1_genomic.fna.faa	GCA_023544605.1	Stenosarchaea group	Methanosarcinia	Eukyarchaea	80	33.3	0	12.5	100	0	0	0	0	0	0
GCA_013374525.1_ASM1337452v1_genomic.fna.faa	GCA_013374525.1	Stenosarchaea group	Methanosarcinia	Eukyarchaea	80	50	0	12.5	100	0	0	0	50	33.3	0
GCA_000979025.1_gtlEnvA5udCFS_genomic.fna.faa	GCA_000979025.1	Stenosarchaea group	Methanosarcinia	Eukyarchaea	80	50	0	12.5	100	0	0	0	0	0	0
GCA_002506015.1_ASM250601v1_genomic.fna.faa	GCA_002506015.1	Stenosarchaea group	Methanosarcinia	Eukyarchaea	80	50	0	0	100	0	0	0	0	0	0
GCA_000979385.1_gtlEnvA5udCFS_genomic.fna.faa	GCA_000979385.1	Stenosarchaea group	Methanosarcinia	Eukyarchaea	80	50	0	12.5	100	0	0	0	0	0	0
GCA_002506415.1_ASM250641v1_genomic.fna.faa	GCA_002506415.1	Stenosarchaea group	Methanosarcinia	Eukyarchaea	80	50	0	12.5	100	0	0	0	50	0	0
GCA_002506535.1_ASM250653v1_genomic.fna.faa	GCA_002506535.1	Stenosarchaea group	Methanosarcinia	Eukyarchaea	100	50	0	0	100	0	0	0	0	0	0
GCA_000341715.1_ASM34171v1_genomic.fna.faa	GCA_000341715.1	Stenosarchaea group	Methanosarcinia	Eukyarchaea	80	50	0	12.5	100	0	0	0	0	0	0
GCA_023249275.1_ASM2324927v1_genomic.fna.faa	GCA_023249275.1	Stenosarchaea group	Methanosarcinia	Eukyarchaea	100	50	0	12.5	100	0	0	0	0	33.3	0
GCA_022837215.1_ASM2283721v1_genomic.fna.faa	GCA_022837215.1	Stenosarchaea group	Methanosarcinia	Eukyarchaea	100	50	0	0	100	0	0	0	100	0	0
GCA_020804225.1_ASM2080422v1_genomic.fna.faa	GCA_020804225.1	Stenosarchaea group	Methanosarcinia	Eukyarchaea	80	50	0	12.5	100	0	0	0	0	0	0
GCA_002507205.1_ASM250720v1_genomic.fna.faa	GCA_002507205.1	Stenosarchaea group	Methanosarcinia	Eukyarchaea	80	50	0	12.5	100	0	0	0	50	0	0
GCA_022839925.1_ASM2283992v1_genomic.fna.faa	GCA_022839925.1	Stenosarchaea group	Methanosarcinia	Eukyarchaea	100	50	0	0	100	0	0	0	0	0	0
GCA_000970285.1_ASM97028v1_genomic.fna.faa	GCA_000970285.1	Stenosarchaea group	Methanosarcinia	Eukyarchaea	80	50	0	12.5	100	0	0	0	0	0	0
GCA_002506095.1_ASM250609v1_genomic.fna.faa	GCA_002506095.1	Stenosarchaea group	Methanosarcinia	Eukyarchaea	80	50	0	12.5	100	0	0	0	0	0	0
GCA_002509325.1_ASM250932v1_genomic.fna.faa	GCA_002509325.1	Stenosarchaea group	Methanosarcinia	Eukyarchaea	80	50	0	12.5	100	0	0	0	0	0	0
GCA_000979675.1_gtlEnvA5udCFS_genomic.fna.faa	GCA_000979675.1	Stenosarchaea group	Methanosarcinia	Eukyarchaea	80	50	0	12.5	100	0	0	0	50	0	0
GCA_002497555.1_ASM249755v1_genomic.fna.faa	GCA_002497555.1	Stenosarchaea group	Methanosarcinia	Eukyarchaea	100	50	0	0	100	0	0	0	100	0	0
GCA_019135935.1_ASM1913593v1_genomic.fna.faa	GCA_019135935.1	Stenosarchaea group	Methanosarcinia	Eukyarchaea	40	33.3	0	0	0	0	0	0	0	0	0
GCA_011620785.1_ASM1162078v1_genomic.fna.faa	GCA_011620785.1	Stenosarchaea group	Methanosarcinia	Eukyarchaea	100	50	0	0	100	0	0	0	0	0	0
GCA_000979015.1_gtlEnvA5udCFS_genomic.fna.faa	GCA_000979015.1	Stenosarchaea group	Methanosarcinia	Eukyarchaea	80	50	0	12.5	100	0	0	0	0	0	0
GCA_023248885.1_ASM2324888v1_genomic.fna.faa	GCA_023248885.1	Stenosarchaea group	Methanosarcinia	Eukyarchaea	60	50	0	12.5	100	0	0	0	0	0	0
GCA_023544575.1_ASM2354457v1_genomic.fna.faa	GCA_023544575.1	Stenosarchaea group	Methanosarcinia	Eukyarchaea	80	50	0	12.5	100	0	0	0	0	0	0
GCA_012026795.1_ASM1202679v1_genomic.fna.faa	GCA_012026795.1	Stenosarchaea group	Methanosarcinia	Eukyarchaea	80	50	0	25	100	0	0	0	100	33.3	0
GCA_022840385.1_ASM2284038v1_genomic.fna.faa	GCA_022840385.1	Stenosarchaea group	Methanosarcinia	Eukyarchaea	100	50	0	0	100	0	0	0	0	0	0
GCA_000970125.1_ASM97012v1_genomic.fna.faa	GCA_000970125.1	Stenosarchaea group	Methanosarcinia	Eukyarchaea	80	50	0	12.5	100	0	0	0	50	0	0
GCA_000979655.1_gtlEnvA5udCFS_genomic.fna.faa	GCA_000979655.1	Stenosarchaea group	Methanosarcinia	Eukyarchaea	80	50	0	12.5	100	0	0	0	50	0	0
GCA_002496165.1_ASM249616v1_genomic.fna.faa	GCA_002496165.1	Stenosarchaea group	Methanosarcinia	Eukyarchaea	100	50	0	12.5	100	0	0	0	0	0	0
GCA_003157235.1_20120600_E3D_genomic.fna.faa	GCA_003157235.1	Stenosarchaea group	Methanosarcinia	Eukyarchaea	80	50	0	12.5	100	0	0	0	0	0	0
GCA_000969905.1_ASM96990v1_genomic.fna.faa	GCA_000969905.1	Stenosarchaea group	Methanosarcinia	Eukyarchaea	80	50	0	12.5	100	0	0	0	0	0	0
GCA_000970265.1_ASM97026v1_genomic.fna.faa	GCA_000970265.1	Stenosarchaea group	Methanosarcinia	Eukyarchaea	80	50	0	12.5	100	0	0	0	0	0	0
GCA_017884895.1_ASM1788489v1_genomic.fna.faa	GCA_017884895.1	Stenosarchaea group	Methanosarcinia	Eukyarchaea	60	50	0	12.5	100	0	0	0	0	0	0
GCA_900100715.1_IMG-taxon_2642422561_annotated_assembly_genomic.fna.faa	GCA_900100715.1	Stenosarchaea group	Methanosarcinia	Eukyarchaea	100	50	0	12.5	100	0	0	0	50	0	0
GCA_000979295.1_gtlEnvA5udCFS_genomic.fna.faa	GCA_000979295.1	Stenosarchaea group	Methanosarcinia	Eukyarchaea	80	50	0	12.5	100	0	0	0	0	0	0
GCA_013329455.1_ASM1332945v1_genomic.fna.faa	GCA_013329455.1	Stenosarchaea group	Methanosarcinia	Eukyarchaea	100	50	0	12.5	100	0	0	0	0	0	0
GCA_016278365.1_ASM1627836v1_genomic.fna.faa	GCA_016278365.1	Stenosarchaea group	Methanosarcinia	Eukyarchaea	80	50	0	12.5	100	0	0	0	0	0	0
GCA_023229165.1_ASM2322916v1_genomic.fna.faa	GCA_023229165.1	Stenosarchaea group	Methanosarcinia	Eukyarchaea	80	50	0	0	100	0	0	0	0	0	0
GCA_000970305.1_ASM97030v1_genomic.fna.faa	GCA_000970305.1	Stenosarchaea group	Methanosarcinia	Eukyarchaea	80	50	0	12.5	100	0	0	0	0	33.3	0
GCA_013374385.1_ASM1337438v1_genomic.fna.faa	GCA_013374385.1	Stenosarchaea group	Methanosarcinia	Eukyarchaea	80	50	0	12.5	100	0	0	0	0	0	0
GCA_000979915.1_gtlEnvA5udCFS_genomic.fna.faa	GCA_000979915.1	Stenosarchaea group	Methanosarcinia	Eukyarchaea	80	50	0	12.5	100	0	0	0	0	0	0
GCA_016278385.1_ASM1627838v1_genomic.fna.faa	GCA_016278385.1	Stenosarchaea group	Methanosarcinia	Eukyarchaea	80	50	0	12.5	100	0	0	0	0	0	0
GCA_000979555.1_gtlEnvA5udCFS_genomic.fna.faa	GCA_000979555.1	Stenosarchaea group	Methanosarcinia	Eukyarchaea	80	50	0	12.5	100	0	0	0	50	0	0
GCA_002761295.1_ASM276129v1_genomic.fna.faa	GCA_002761295.1	Stenosarchaea group	Methanosarcinia	Eukyarchaea	80	50	0	0	100	0	0	0	0	0	0
GCA_000970185.1_ASM97018v1_genomic.fna.faa	GCA_000970185.1	Stenosarchaea group	Methanosarcinia	Eukyarchaea	80	50	0	12.5	100	0	0	0	0	0	0
GCA_022837945.1_ASM2283794v1_genomic.fna.faa	GCA_022837945.1	Stenosarchaea group	Methanosarcinia	Eukyarchaea	100	50	0	0	100	0	0	0	0	0	0
GCA_000979595.1_gtlEnvA5udCFS_genomic.fna.faa	GCA_000979595.1	Stenosarchaea group	Methanosarcinia	Eukyarchaea	80	50	0	12.5	100	0	0	0	0	0	0
GCA_002502475.1_ASM250247v1_genomic.fna.faa	GCA_002502475.1	Stenosarchaea group	Methanosarcinia	Eukyarchaea	60	33.3	0	0	100	0	0	0	0	0	0
GCA_000979415.1_gtlEnvA5udCFS_genomic.fna.faa	GCA_000979415.1	Stenosarchaea group	Methanosarcinia	Eukyarchaea	80	50	0	12.5	100	0	0	0	0	0	0
GCA_009649835.1_ASM964983v1_genomic.fna.faa	GCA_009649835.1	Stenosarchaea group	Methanosarcinia	Eukyarchaea	80	50	0	12.5	100	0	0	0	50	0	0
GCA_905171685.1_GoM-Arc1_E50_genomic.fna.faa	GCA_905171685.1	Stenosarchaea group	Methanosarcinia	Eukyarchaea	60	50	0	0	100	0	0	0	50	0	0
GCA_002503805.1_ASM250380v1_genomic.fna.faa	GCA_002503805.1	Stenosarchaea group	Methanosarcinia	Eukyarchaea	60	50	0	0	100	0	0	0	0	0	0
GCA_000979515.1_gtlEnvA5udCFS_genomic.fna.faa	GCA_000979515.1	Stenosarchaea group	Methanosarcinia	Eukyarchaea	80	50	0	12.5	100	0	0	0	50	0	0
GCA_017994055.1_ASM1799405v1_genomic.fna.faa	GCA_017994055.1	Stenosarchaea group	Methanosarcinia	Eukyarchaea	100	50	0	0	100	0	0	0	0	0	0
GCA_000204415.1_ASM20441v1_genomic.fna.faa	GCA_000204415.1	Stenosarchaea group	Methanosarcinia	Eukyarchaea	100	50	0	12.5	100	0	0	0	0	0	0
GCA_013374495.1_ASM1337449v1_genomic.fna.faa	GCA_013374495.1	Stenosarchaea group	Methanosarcinia	Eukyarchaea	100	50	0	12.5	100	0	0	0	50	0	0
GCA_022839685.1_ASM2283968v1_genomic.fna.faa	GCA_022839685.1	Stenosarchaea group	Methanosarcinia	Eukyarchaea	100	50	0	12.5	100	0	0	0	100	0	0
GCA_900114835.1_IMG-taxon_2642422540_annotated_assembly_genomic.fna.faa	GCA_900114835.1	Stenosarchaea group	Methanosarcinia	Eukyarchaea	80	50	0	12.5	100	0	0	0	50	0	0
GCA_000979255.1_gtlEnvA5udCFS_genomic.fna.faa	GCA_000979255.1	Stenosarchaea group	Methanosarcinia	Eukyarchaea	80	50	0	12.5	100	0	0	0	0	0	0
GCA_000979685.1_gtlEnvA5udCFS_genomic.fna.faa	GCA_000979685.1	Stenosarchaea group	Methanosarcinia	Eukyarchaea	80	50	0	12.5	100	0	0	0	50	0	0
GCA_000979855.1_gtlEnvA5udCFS_genomic.fna.faa	GCA_000979855.1	Stenosarchaea group	Methanosarcinia	Eukyarchaea	80	50	0	12.5	100	0	0	0	0	0	0
GCA_000979115.1_gtlEnvA5udCFS_genomic.fna.faa	GCA_000979115.1	Stenosarchaea group	Methanosarcinia	Eukyarchaea	80	50	0	12.5	100	0	0	0	0	0	0
GCA_002498505.1_ASM249850v1_genomic.fna.faa	GCA_002498505.1	Stenosarchaea group	Methanosarcinia	Eukyarchaea	100	50	0	0	100	0	0	0	100	0	0
GCA_000979265.1_gtlEnvA5udCFS_genomic.fna.faa	GCA_000979265.1	Stenosarchaea group	Methanosarcinia	Eukyarchaea	80	50	0	12.5	100	0	0	0	0	0	0
GCA_010706455.1_ASM1070645v1_genomic.fna.faa	GCA_010706455.1	Stenosarchaea group	Methanosarcinia	Eukyarchaea	80	50	0	12.5	100	0	0	0	0	0	0
GCA_002496095.1_ASM249609v1_genomic.fna.faa	GCA_002496095.1	Stenosarchaea group	Methanosarcinia	Eukyarchaea	80	50	0	12.5	100	0	0	0	50	0	0
GCA_002256595.1_ASM225659v1_genomic.fna.faa	GCA_002256595.1	Stenosarchaea group	Methanosarcinia	Eukyarchaea	60	50	0	0	100	0	0	0	0	0	0
GCA_022840035.1_ASM2284003v1_genomic.fna.faa	GCA_022840035.1	Stenosarchaea group	Methanosarcinia	Eukyarchaea	100	50	0	12.5	100	0	0	0	0	0	0
GCA_013374405.1_ASM1337440v1_genomic.fna.faa	GCA_013374405.1	Stenosarchaea group	Methanosarcinia	Eukyarchaea	20	33.3	0	0	100	0	0	0	0	0	0
GCA_022710045.1_ASM2271004v1_genomic.fna.faa	GCA_022710045.1	Stenosarchaea group	Methanosarcinia	Eukyarchaea	80	50	0	0	100	0	0	0	100	0	0
GCA_004294765.1_ASM429476v1_genomic.fna.faa	GCA_004294765.1	Stenosarchaea group	Methanosarcinia	Eukyarchaea	20	50	0	12.5	100	0	0	0	0	0	0
GCA_000979505.1_gtlEnvA5udCFS_genomic.fna.faa	GCA_000979505.1	Stenosarchaea group	Methanosarcinia	Eukyarchaea	80	50	0	12.5	100	0	0	0	0	0	0
GCA_002501695.1_ASM250169v1_genomic.fna.faa	GCA_002501695.1	Stenosarchaea group	Methanosarcinia	Eukyarchaea	80	50	0	12.5	100	0	0	0	0	0	0
GCA_002507035.1_ASM250703v1_genomic.fna.faa	GCA_002507035.1	Stenosarchaea group	Methanosarcinia	Eukyarchaea	80	50	0	0	100	0	0	0	0	0	0
GCA_002499445.1_ASM249944v1_genomic.fna.faa	GCA_002499445.1	Stenosarchaea group	Methanosarcinia	Eukyarchaea	80	50	0	12.5	100	0	0	0	50	33.3	0
GCA_022840505.1_ASM2284050v1_genomic.fna.faa	GCA_022840505.1	Stenosarchaea group	Methanosarcinia	Eukyarchaea	100	50	0	0	100	0	0	0	0	0	0
GCA_000979335.1_gtlEnvA5udCFS_genomic.fna.faa	GCA_000979335.1	Stenosarchaea group	Methanosarcinia	Eukyarchaea	80	50	0	12.5	100	0	0	0	0	0	0
GCA_002497045.1_ASM249704v1_genomic.fna.faa	GCA_002497045.1	Stenosarchaea group	Methanosarcinia	Eukyarchaea	80	33.3	0	12.5	100	0	0	0	50	0	0
GCA_000025865.1_ASM2586v1_genomic.fna.faa	GCA_000025865.1	Stenosarchaea group	Methanosarcinia	Eukyarchaea	80	50	0	0	100	0	0	0	50	0	0
GCA_002503835.1_ASM250383v1_genomic.fna.faa	GCA_002503835.1	Stenosarchaea group	Methanosarcinia	Eukyarchaea	100	50	0	0	100	0	0	0	0	0	0
GCA_000979845.1_gtlEnvA5udCFS_genomic.fna.faa	GCA_000979845.1	Stenosarchaea group	Methanosarcinia	Eukyarchaea	80	50	0	12.5	100	0	0	0	0	0	0
GCA_002508475.1_ASM250847v1_genomic.fna.faa	GCA_002508475.1	Stenosarchaea group	Methanosarcinia	Eukyarchaea	80	50	0	12.5	100	0	0	0	50	0	0
GCA_000980105.1_gtlEnvA5udCFS_genomic.fna.faa	GCA_000980105.1	Stenosarchaea group	Methanosarcinia	Eukyarchaea	80	50	0	12.5	100	0	0	0	0	0	0
GCA_002508425.1_ASM250842v1_genomic.fna.faa	GCA_002508425.1	Stenosarchaea group	Methanosarcinia	Eukyarchaea	100	50	0	12.5	100	0	0	0	0	0	0
GCA_023228345.1_ASM2322834v1_genomic.fna.faa	GCA_023228345.1	Stenosarchaea group	Methanosarcinia	Eukyarchaea	80	33.3	0	0	100	0	0	0	0	0	0
GCA_000196655.1_ASM19665v1_genomic.fna.faa	GCA_000196655.1	Stenosarchaea group	Methanosarcinia	Eukyarchaea	80	50	0	12.5	100	0	0	0	0	0	0
GCA_018052825.1_ASM1805282v1_genomic.fna.faa	GCA_018052825.1	Stenosarchaea group	Methanosarcinia	Eukyarchaea	100	50	0	0	100	0	0	0	0	0	0
GCA_020793555.1_ASM2079355v1_genomic.fna.faa	GCA_020793555.1	Stenosarchaea group	Methanosarcinia	Eukyarchaea	60	50	0	12.5	100	0	0	0	0	0	0
GCA_000979815.1_gtlEnvA5udCFS_genomic.fna.faa	GCA_000979815.1	Stenosarchaea group	Methanosarcinia	Eukyarchaea	80	50	0	12.5	100	0	0	0	50	0	0
GCA_002498745.1_ASM249874v1_genomic.fna.faa	GCA_002498745.1	Stenosarchaea group	Methanosarcinia	Eukyarchaea	80	50	0	0	100	0	0	0	0	0	0
GCA_002502405.1_ASM250240v1_genomic.fna.faa	GCA_002502405.1	Stenosarchaea group	Methanosarcinia	Eukyarchaea	100	50	0	0	100	0	0	0	0	0	0
GCA_013335585.1_ASM1333558v1_genomic.fna.faa	GCA_013335585.1	Stenosarchaea group	Methanosarcinia	Eukyarchaea	60	33.3	0	0	100	0	0	0	0	0	0
GCA_002839545.1_ASM283954v1_genomic.fna.faa	GCA_002839545.1	Stenosarchaea group	Methanosarcinia	Eukyarchaea	100	50	0	12.5	100	0	0	0	0	0	0
GCA_004137855.1_ASM413785v1_genomic.fna.faa	GCA_004137855.1	Stenosarchaea group	Methanosarcinia	Eukyarchaea	80	50	0	12.5	100	0	0	0	0	0	0
GCA_003164755.1_20120700_S1D_genomic.fna.faa	GCA_003164755.1	Stenosarchaea group	Methanosarcinia	Eukyarchaea	80	50	0	12.5	100	0	0	0	0	0	0
GCA_001889405.1_ASM188940v1_genomic.fna.faa	GCA_001889405.1	Stenosarchaea group	Methanosarcinia	Eukyarchaea	80	50	0	0	100	0	0	0	50	0	0
GCA_003336385.2_ASM333638v2_genomic.fna.faa	GCA_003336385.2	Stenosarchaea group	Methanosarcinia	Eukyarchaea	80	50	0	12.5	100	0	0	0	0	0	0
GCA_002256575.1_ASM225657v1_genomic.fna.faa	GCA_002256575.1	Stenosarchaea group	Methanosarcinia	Eukyarchaea	60	50	0	0	100	0	0	0	0	0	0
GCA_016841265.1_ASM1684126v1_genomic.fna.faa	GCA_016841265.1	unclassified Euryarchaeota	Methanosarcinia	Eukyarchaea	80	50	0	12.5	100	0	0	0	0	0	0
GCA_001027005.1_ASM102700v1_genomic.fna.faa	GCA_001027005.1	Stenosarchaea group	Methanosarcinia	Eukyarchaea	80	50	0	12.5	100	0	0	0	50	0	0
GCA_012910725.1_ASM1291072v1_genomic.fna.faa	GCA_012910725.1	Stenosarchaea group	Methanosarcinia	Eukyarchaea	80	33.3	0	0	100	0	0	0	0	0	0
GCA_000979745.1_gtlEnvA5udCFS_genomic.fna.faa	GCA_000979745.1	Stenosarchaea group	Methanosarcinia	Eukyarchaea	80	50	0	12.5	100	0	0	0	0	0	0
GCA_002506455.1_ASM250645v1_genomic.fna.faa	GCA_002506455.1	Stenosarchaea group	Methanosarcinia	Eukyarchaea	80	50	0	12.5	100	0	0	0	50	0	0
GCA_000979665.1_gtlEnvA5udCFS_genomic.fna.faa	GCA_000979665.1	Stenosarchaea group	Methanosarcinia	Eukyarchaea	80	50	0	12.5	100	0	0	0	0	0	0
GCA_013331375.1_ASM1333137v1_genomic.fna.faa	GCA_013331375.1	Stenosarchaea group	Methanosarcinia	Eukyarchaea	40	33.3	0	0	100	0	0	0	0	33.3	0
GCA_002494545.1_ASM249454v1_genomic.fna.faa	GCA_002494545.1	Stenosarchaea group	Methanosarcinia	Eukyarchaea	80	50	0	12.5	100	0	0	0	50	0	0
GCA_002495725.1_ASM249572v1_genomic.fna.faa	GCA_002495725.1	Stenosarchaea group	Methanosarcinia	Eukyarchaea	80	50	0	12.5	100	0	0	0	50	0	0
GCA_022839085.1_ASM2283908v1_genomic.fna.faa	GCA_022839085.1	Stenosarchaea group	Methanosarcinia	Eukyarchaea	80	50	0	0	100	0	0	0	0	0	0
GCA_020844795.1_ASM2084479v1_genomic.fna.faa	GCA_020844795.1	Stenosarchaea group	Methanosarcinia	Eukyarchaea	100	50	0	0	100	0	0	0	100	0	0
GCA_003170635.1_20110800_E2M_genomic.fna.faa	GCA_003170635.1	Stenosarchaea group	Methanosarcinia	Eukyarchaea	60	50	0	0	100	0	0	0	0	0	0
GCA_002505025.1_ASM250502v1_genomic.fna.faa	GCA_002505025.1	Stenosarchaea group	Methanosarcinia	Eukyarchaea	100	50	0	0	100	0	0	0	100	0	0
GCA_000980025.1_gtlEnvA5udCFS_genomic.fna.faa	GCA_000980025.1	Stenosarchaea group	Methanosarcinia	Eukyarchaea	80	50	0	12.5	100	0	0	0	0	0	0
GCA_002503365.1_ASM250336v1_genomic.fna.faa	GCA_002503365.1	Stenosarchaea group	Methanosarcinia	Eukyarchaea	80	50	0	12.5	100	0	0	0	0	0	0
GCA_013330355.1_ASM1333035v1_genomic.fna.faa	GCA_013330355.1	Stenosarchaea group	Methanosarcinia	Eukyarchaea	20	50	0	12.5	100	0	0	0	50	0	0
GCA_000979735.1_gtlEnvA5udCFS_genomic.fna.faa	GCA_000979735.1	Stenosarchaea group	Methanosarcinia	Eukyarchaea	80	50	0	12.5	100	0	0	0	50	0	0
GCA_900111645.1_IMG-taxon_2642422537_annotated_assembly_genomic.fna.faa	GCA_900111645.1	Stenosarchaea group	Methanosarcinia	Eukyarchaea	80	50	0	12.5	100	0	0	0	50	0	0
GCA_005504395.1_ASM550439v1_genomic.fna.faa	GCA_005504395.1	Stenosarchaea group	Methanosarcinia	Eukyarchaea	60	50	0	12.5	100	0	0	0	0	33.3	0
GCA_000969885.1_ASM96988v1_genomic.fna.faa	GCA_000969885.1	Stenosarchaea group	Methanosarcinia	Eukyarchaea	80	50	0	12.5	100	0	0	0	50	0	0
GCA_000980175.1_gtlEnvA5udCFS_genomic.fna.faa	GCA_000980175.1	Stenosarchaea group	Methanosarcinia	Eukyarchaea	80	50	0	12.5	100	0	0	0	0	0	0
GCA_013374465.1_ASM1337446v1_genomic.fna.faa	GCA_013374465.1	Stenosarchaea group	Methanosarcinia	Eukyarchaea	20	16.7	0	0	100	0	0	0	0	0	0
GCA_002505825.1_ASM250582v1_genomic.fna.faa	GCA_002505825.1	Stenosarchaea group	Methanosarcinia	Eukyarchaea	20	33.3	0	12.5	100	0	0	0	50	0	0
GCA_022841105.1_ASM2284110v1_genomic.fna.faa	GCA_022841105.1	Stenosarchaea group	Methanosarcinia	Eukyarchaea	60	50	0	0	0	0	0	0	0	0	0
GCA_013331265.1_ASM1333126v1_genomic.fna.faa	GCA_013331265.1	Stenosarchaea group	Methanosarcinia	Eukyarchaea	80	50	0	12.5	100	0	0	0	0	0	0
GCA_002506335.1_ASM250633v1_genomic.fna.faa	GCA_002506335.1	Stenosarchaea group	Methanosarcinia	Eukyarchaea	100	50	0	12.5	100	0	0	0	0	0	0
GCA_002494845.1_ASM249484v1_genomic.fna.faa	GCA_002494845.1	Stenosarchaea group	Methanosarcinia	Eukyarchaea	80	50	0	12.5	100	0	0	0	0	0	0
GCA_000979185.1_gtlEnvA5udCFS_genomic.fna.faa	GCA_000979185.1	Stenosarchaea group	Methanosarcinia	Eukyarchaea	80	50	0	12.5	100	0	0	0	50	0	0
GCA_000980135.1_gtlEnvA5udCFS_genomic.fna.faa	GCA_000980135.1	Stenosarchaea group	Methanosarcinia	Eukyarchaea	80	50	0	12.5	100	0	0	0	0	0	0
GCA_000979825.1_gtlEnvA5udCFS_genomic.fna.faa	GCA_000979825.1	Stenosarchaea group	Methanosarcinia	Eukyarchaea	80	50	0	12.5	100	0	0	0	50	0	0
GCA_001888095.1_ASM188809v1_genomic.fna.faa	GCA_001888095.1	Stenosarchaea group	Methanosarcinia	Eukyarchaea	80	50	0	0	100	0	0	0	0	0	0
GCA_002506915.1_ASM250691v1_genomic.fna.faa	GCA_002506915.1	Stenosarchaea group	Methanosarcinia	Eukyarchaea	80	50	0	12.5	100	0	0	0	0	0	0
GCA_004363215.1_ASM436321v1_genomic.fna.faa	GCA_004363215.1	Stenosarchaea group	Methanosarcinia	Eukyarchaea	80	50	0	0	100	0	0	0	0	0	0
GCA_000979105.1_gtlEnvA5udCFS_genomic.fna.faa	GCA_000979105.1	Stenosarchaea group	Methanosarcinia	Eukyarchaea	80	50	0	12.5	100	0	0	0	0	0	0
GCA_001603195.1_ASM160319v1_genomic.fna.faa	GCA_001603195.1	Stenosarchaea group	Methanosarcinia	Eukyarchaea	100	50	0	0	100	0	0	0	100	0	0
GCA_021129955.1_ASM2112995v1_genomic.fna.faa	GCA_021129955.1	Stenosarchaea group	Methanosarcinia	Eukyarchaea	100	66.7	0	0	100	0	0	0	0	0	0
GCA_002504605.1_ASM250460v1_genomic.fna.faa	GCA_002504605.1	Stenosarchaea group	Methanosarcinia	Eukyarchaea	80	50	0	12.5	100	0	0	0	0	0	0
GCA_000970065.1_ASM97006v1_genomic.fna.faa	GCA_000970065.1	Stenosarchaea group	Methanosarcinia	Eukyarchaea	80	50	0	12.5	100	0	0	0	50	0	0
GCA_000970045.1_ASM97004v1_genomic.fna.faa	GCA_000970045.1	Stenosarchaea group	Methanosarcinia	Eukyarchaea	80	50	0	12.5	100	0	0	0	0	0	0
GCA_000970025.1_ASM97002v1_genomic.fna.faa	GCA_000970025.1	Stenosarchaea group	Methanosarcinia	Eukyarchaea	80	50	0	12.5	100	0	0	0	50	0	0
GCA_000014945.1_ASM1494v1_genomic.fna.faa	GCA_000014945.1	Stenosarchaea group	Methanosarcinia	Eukyarchaea	80	50	0	12.5	100	0	0	0	0	0	0
GCA_000979345.1_gtlEnvA5udCFS_genomic.fna.faa	GCA_000979345.1	Stenosarchaea group	Methanosarcinia	Eukyarchaea	80	50	0	12.5	100	0	0	0	0	0	0
GCA_000969965.1_ASM96996v1_genomic.fna.faa	GCA_000969965.1	Stenosarchaea group	Methanosarcinia	Eukyarchaea	80	50	0	12.5	100	0	0	0	0	0	0
GCA_023544495.1_ASM2354449v1_genomic.fna.faa	GCA_023544495.1	Stenosarchaea group	Methanosarcinia	Eukyarchaea	80	50	0	0	100	0	0	0	0	0	0
GCA_014237495.1_ASM1423749v1_genomic.fna.faa	GCA_014237495.1	Stenosarchaea group	Methanosarcinia	Eukyarchaea	80	50	0	12.5	100	0	0	0	50	0	0
GCA_013329655.1_ASM1332965v1_genomic.fna.faa	GCA_013329655.1	Stenosarchaea group	Methanosarcinia	Eukyarchaea	80	50	0	12.5	100	0	0	0	50	0	0
GCA_003162615.1_20100900_E3D_genomic.fna.faa	GCA_003162615.1	Stenosarchaea group	Methanosarcinia	Eukyarchaea	100	50	0	0	100	0	0	0	0	0	0
GCA_003104905.1_ASM310490v1_genomic.fna.faa	GCA_003104905.1	Stenosarchaea group	Methanosarcinia	Eukyarchaea	100	50	0	12.5	100	0	0	0	50	0	0
GCA_019669945.1_ASM1966994v1_genomic.fna.faa	GCA_019669945.1	Stenosarchaea group	Methanosarcinia	Eukyarchaea	80	50	0	12.5	100	0	0	0	50	0	0
GCA_000969985.1_ASM96998v1_genomic.fna.faa	GCA_000969985.1	Stenosarchaea group	Methanosarcinia	Eukyarchaea	80	50	0	12.5	100	0	0	0	50	0	0
GCA_017994095.1_ASM1799409v1_genomic.fna.faa	GCA_017994095.1	Stenosarchaea group	Methanosarcinia	Eukyarchaea	100	50	0	12.5	100	0	0	0	0	0	0
GCA_022839595.1_ASM2283959v1_genomic.fna.faa	GCA_022839595.1	Stenosarchaea group	Methanosarcinia	Eukyarchaea	100	50	0	0	100	0	0	0	0	0	0
GCA_013572355.1_ASM1357235v1_genomic.fna.faa	GCA_013572355.1	Stenosarchaea group	Methanosarcinia	Eukyarchaea	100	50	0	12.5	100	0	0	0	0	0	0
GCA_002496565.1_ASM249656v1_genomic.fna.faa	GCA_002496565.1	Stenosarchaea group	Methanosarcinia	Eukyarchaea	80	50	0	12.5	100	0	0	0	50	0	0
GCA_000970325.1_ASM97032v1_genomic.fna.faa	GCA_000970325.1	Stenosarchaea group	Methanosarcinia	Eukyarchaea	60	50	0	12.5	100	0	0	0	50	0	0
GCA_013330315.1_ASM1333031v1_genomic.fna.faa	GCA_013330315.1	Stenosarchaea group	Methanosarcinia	Eukyarchaea	80	50	0	12.5	100	0	0	0	0	0	0
GCA_900116525.1_IMG-taxon_2595698250_annotated_assembly_genomic.fna.faa	GCA_900116525.1	Stenosarchaea group	Methanosarcinia	Eukyarchaea	80	50	0	12.5	100	0	0	0	50	0	0
GCA_000979205.1_gtlEnvA5udCFS_genomic.fna.faa	GCA_000979205.1	Stenosarchaea group	Methanosarcinia	Eukyarchaea	80	50	0	12.5	100	0	0	0	0	0	0
GCA_023249105.1_ASM2324910v1_genomic.fna.faa	GCA_023249105.1	Stenosarchaea group	Methanosarcinia	Eukyarchaea	100	50	0	12.5	100	0	0	0	0	0	0
GCA_000979045.1_gtlEnvA5udCFS_genomic.fna.faa	GCA_000979045.1	Stenosarchaea group	Methanosarcinia	Eukyarchaea	80	50	0	12.5	100	0	0	0	0	0	0
GCA_000978965.1_gtlEnvA5udCFS_genomic.fna.faa	GCA_000978965.1	Stenosarchaea group	Methanosarcinia	Eukyarchaea	80	50	0	12.5	100	0	0	0	0	0	0
GCA_000979935.1_gtlEnvA5udCFS_genomic.fna.faa	GCA_000979935.1	Stenosarchaea group	Methanosarcinia	Eukyarchaea	80	50	0	12.5	100	0	0	0	50	0	0
GCA_000979425.1_gtlEnvA5udCFS_genomic.fna.faa	GCA_000979425.1	Stenosarchaea group	Methanosarcinia	Eukyarchaea	80	50	0	12.5	100	0	0	0	0	0	0
GCA_013374455.1_ASM1337445v1_genomic.fna.faa	GCA_013374455.1	Stenosarchaea group	Methanosarcinia	Eukyarchaea	80	50	0	12.5	100	0	0	0	0	0	0
GCA_000970225.1_ASM97022v1_genomic.fna.faa	GCA_000970225.1	Stenosarchaea group	Methanosarcinia	Eukyarchaea	80	50	0	12.5	100	0	0	0	50	0	0
GCA_013335125.1_ASM1333512v1_genomic.fna.faa	GCA_013335125.1	Stenosarchaea group	Methanosarcinia	Eukyarchaea	60	50	0	0	100	0	0	0	0	0	0
GCA_000980155.1_gtlEnvA5udCFS_genomic.fna.faa	GCA_000980155.1	Stenosarchaea group	Methanosarcinia	Eukyarchaea	80	50	0	12.5	100	0	0	0	0	0	0
GCA_002254825.2_ASM225482v2_genomic.fna.faa	GCA_002254825.2	Stenosarchaea group	Methanosarcinia	Eukyarchaea	80	33.3	0	0	100	0	0	0	50	0	0
GCA_000979975.1_gtlEnvA5udCFS_genomic.fna.faa	GCA_000979975.1	Stenosarchaea group	Methanosarcinia	Eukyarchaea	80	50	0	12.5	100	0	0	0	50	0	0
GCA_002508385.1_ASM250838v1_genomic.fna.faa	GCA_002508385.1	Stenosarchaea group	Methanosarcinia	Eukyarchaea	80	50	0	12.5	100	0	0	0	0	0	0
GCA_000980005.1_gtlEnvA5udCFS_genomic.fna.faa	GCA_000980005.1	Stenosarchaea group	Methanosarcinia	Eukyarchaea	80	50	0	12.5	100	0	0	0	0	0	0
GCA_000217995.1_ASM21799v1_genomic.fna.faa	GCA_000217995.1	Stenosarchaea group	Methanosarcinia	Eukyarchaea	80	50	0	12.5	100	100	0	0	0	0	0
GCA_000979455.1_gtlEnvA5udCFS_genomic.fna.faa	GCA_000979455.1	Stenosarchaea group	Methanosarcinia	Eukyarchaea	80	50	0	12.5	100	0	0	0	0	0	0
GCA_002497945.1_ASM249794v1_genomic.fna.faa	GCA_002497945.1	Stenosarchaea group	Methanosarcinia	Eukyarchaea	100	50	0	12.5	100	0	0	0	50	0	0
GCA_000979995.1_gtlEnvA5udCFS_genomic.fna.faa	GCA_000979995.1	Stenosarchaea group	Methanosarcinia	Eukyarchaea	80	50	0	12.5	100	0	0	0	50	0	0
GCA_000979475.1_gtlEnvA5udCFS_genomic.fna.faa	GCA_000979475.1	Stenosarchaea group	Methanosarcinia	Eukyarchaea	80	50	0	12.5	100	0	0	0	0	0	0
GCA_002496465.1_ASM249646v1_genomic.fna.faa	GCA_002496465.1	Stenosarchaea group	Methanosarcinia	Eukyarchaea	100	50	0	12.5	100	0	0	0	0	0	0
GCA_000978945.1_gtlEnvA5udCFS_genomic.fna.faa	GCA_000978945.1	Stenosarchaea group	Methanosarcinia	Eukyarchaea	80	50	0	12.5	100	0	0	0	50	0	0
GCA_002497705.1_ASM249770v1_genomic.fna.faa	GCA_002497705.1	Stenosarchaea group	Methanosarcinia	Eukyarchaea	100	50	0	0	100	0	0	0	0	0	0
GCA_002501765.1_ASM250176v1_genomic.fna.faa	GCA_002501765.1	Stenosarchaea group	Methanosarcinia	Eukyarchaea	60	50	0	0	100	0	0	0	100	0	0
GCA_000979575.1_gtlEnvA5udCFS_genomic.fna.faa	GCA_000979575.1	Stenosarchaea group	Methanosarcinia	Eukyarchaea	80	50	0	12.5	100	0	0	0	50	0	0
GCA_002502805.1_ASM250280v1_genomic.fna.faa	GCA_002502805.1	Stenosarchaea group	Methanosarcinia	Eukyarchaea	80	50	0	12.5	100	0	0	0	50	0	0
GCA_013374365.1_ASM1337436v1_genomic.fna.faa	GCA_013374365.1	Stenosarchaea group	Methanosarcinia	Eukyarchaea	60	33.3	0	12.5	100	0	0	0	50	0	0
GCA_000328665.1_ASM32866v1_genomic.fna.faa	GCA_000328665.1	Stenosarchaea group	Methanosarcinia	Eukyarchaea	60	50	0	12.5	100	0	0	0	0	0	0
GCA_000685155.1_ANME2D_V10_genomic.fna.faa	GCA_000685155.1	Stenosarchaea group	Methanosarcinia	Eukyarchaea	60	50	0	25	100	0	0	0	0	0	0
GCA_022837155.1_ASM2283715v1_genomic.fna.faa	GCA_022837155.1	Stenosarchaea group	Methanosarcinia	Eukyarchaea	100	50	0	0	100	0	0	0	50	0	0
GCA_023228095.1_ASM2322809v1_genomic.fna.faa	GCA_023228095.1	Stenosarchaea group	Methanosarcinia	Eukyarchaea	100	50	0	12.5	100	0	0	0	0	0	0
GCA_000013725.1_ASM1372v1_genomic.fna.faa	GCA_000013725.1	Stenosarchaea group	Methanosarcinia	Eukyarchaea	60	50	0	0	100	0	0	0	100	0	0
GCA_022837645.1_ASM2283764v1_genomic.fna.faa	GCA_022837645.1	Stenosarchaea group	Methanosarcinia	Eukyarchaea	100	50	0	12.5	100	0	0	0	100	0	0
GCA_002509335.1_ASM250933v1_genomic.fna.faa	GCA_002509335.1	Stenosarchaea group	Methanosarcinia	Eukyarchaea	80	50	0	12.5	100	0	0	0	0	0	0
GCA_000979095.1_gtlEnvA5udCFS_genomic.fna.faa	GCA_000979095.1	Stenosarchaea group	Methanosarcinia	Eukyarchaea	80	50	0	12.5	100	0	0	0	0	0	0
GCA_002501645.1_ASM250164v1_genomic.fna.faa	GCA_002501645.1	Stenosarchaea group	Methanosarcinia	Eukyarchaea	80	50	0	12.5	100	0	0	0	50	0	0
GCA_018263315.1_ASM1826331v1_genomic.fna.faa	GCA_018263315.1	Stenosarchaea group	Methanosarcinia	Eukyarchaea	80	50	0	0	100	0	0	0	0	0	0
GCA_000979495.1_gtlEnvA5udCFS_genomic.fna.faa	GCA_000979495.1	Stenosarchaea group	Methanosarcinia	Eukyarchaea	80	50	0	12.5	100	0	0	0	0	0	0
GCA_000007065.1_ASM706v1_genomic.fna.faa	GCA_000007065.1	Stenosarchaea group	Methanosarcinia	Eukyarchaea	80	50	0	12.5	100	0	0	0	0	0	0
GCA_003157115.1_20120600_E3D_genomic.fna.faa	GCA_003157115.1	Stenosarchaea group	Methanosarcinia	Eukyarchaea	100	50	0	0	100	0	0	0	0	0	0
GCA_002508465.1_ASM250846v1_genomic.fna.faa	GCA_002508465.1	Stenosarchaea group	Methanosarcinia	Eukyarchaea	80	50	0	12.5	100	0	0	0	0	33.3	0
GCA_022840705.1_ASM2284070v1_genomic.fna.faa	GCA_022840705.1	Stenosarchaea group	Methanosarcinia	Eukyarchaea	100	50	0	0	100	0	0	0	0	0	0
GCA_001603225.1_ASM160322v1_genomic.fna.faa	GCA_001603225.1	Stenosarchaea group	Methanosarcinia	Eukyarchaea	20	50	0	12.5	100	0	0	0	0	0	0
GCA_020055655.1_ASM2005565v1_genomic.fna.faa	GCA_020055655.1	Stenosarchaea group	Methanosarcinia	Eukyarchaea	80	50	0	12.5	100	0	0	0	0	0	0
GCA_000979195.1_gtlEnvA5udCFS_genomic.fna.faa	GCA_000979195.1	Stenosarchaea group	Methanosarcinia	Eukyarchaea	80	50	0	12.5	100	0	0	0	0	0	0
GCA_000970205.1_ASM97020v1_genomic.fna.faa	GCA_000970205.1	Stenosarchaea group	Methanosarcinia	Eukyarchaea	80	50	0	12.5	100	0	0	0	0	0	0
GCA_013331275.1_ASM1333127v1_genomic.fna.faa	GCA_013331275.1	Stenosarchaea group	Methanosarcinia	Eukyarchaea	80	50	0	12.5	100	0	0	0	0	33.3	0
GCA_023684405.1_ASM2368440v1_genomic.fna.faa	GCA_023684405.1	Stenosarchaea group	Methanosarcinia	Eukyarchaea	80	50	0	12.5	100	0	0	0	100	0	0
GCA_000711905.1_ASM71190v1_genomic.fna.faa	GCA_000711905.1	Stenosarchaea group	Methanosarcinia_A	Eukyarchaea	80	50	0	12.5	100	0	0	0	100	0	0
GCA_002494745.1_ASM249474v1_genomic.fna.faa	GCA_002494745.1	Stenosarchaea group	Methanosarcinia_A	Eukyarchaea	80	50	0	12.5	100	0	0	0	100	0	0
GCA_013330515.1_ASM1333051v1_genomic.fna.faa	GCA_013330515.1	Stenosarchaea group	Methanosarcinia_A	Eukyarchaea	80	50	0	12.5	100	0	0	0	100	0	0
GCA_023379585.1_ASM2337958v1_genomic	GCA_023379585.1	Candidatus Marsarchaeota	Micrarchaeia	TACK	0	0	0	0	100	0	0	0	0	0	0
GCA_023473605.1_ASM2347360v1_genomic	GCA_023473605.1	Candidatus Marsarchaeota	Micrarchaeia	TACK	20	50	0	0	100	0	0	0	0	0	0
GCA_023379075.1_ASM2337907v1_genomic	GCA_023379075.1	Candidatus Marsarchaeota	Micrarchaeia	TACK	60	50	0	0	100	0	0	0	0	0	0
GCA_023485295.1_ASM2348529v1_genomic	GCA_023485295.1	Candidatus Marsarchaeota	Micrarchaeia	TACK	80	0	0	12.5	100	0	0	0	0	0	0
GCA_023380835.1_ASM2338083v1_genomic	GCA_023380835.1	Candidatus Marsarchaeota	Micrarchaeia	TACK	60	0	0	87.5	100	0	0	0	0	0	0
GCA_023473805.1_ASM2347380v1_genomic	GCA_023473805.1	Candidatus Marsarchaeota	Micrarchaeia	TACK	0	50	0	0	100	0	0	0	0	0	0
GCA_023488825.1_ASM2348882v1_genomic	GCA_023488825.1	Candidatus Marsarchaeota	Micrarchaeia	TACK	60	50	0	12.5	100	100	0	0	0	0	0
GCA_023474775.1_ASM2347477v1_genomic	GCA_023474775.1	Candidatus Marsarchaeota	Micrarchaeia	TACK	0	0	0	12.5	100	0	0	0	0	0	0
GCA_023380455.1_ASM2338045v1_genomic	GCA_023380455.1	Candidatus Marsarchaeota	Micrarchaeia	TACK	60	0	0	0	100	0	0	0	0	0	0
GCA_023380875.1_ASM2338087v1_genomic	GCA_023380875.1	Candidatus Marsarchaeota	Micrarchaeia	TACK	60	50	0	12.5	0	0	0	0	0	0	0
GCA_023474585.1_ASM2347458v1_genomic	GCA_023474585.1	Candidatus Marsarchaeota	Micrarchaeia	TACK	60	33.3	0	0	100	0	0	0	0	0	0
GCA_023380735.1_ASM2338073v1_genomic	GCA_023380735.1	Candidatus Marsarchaeota	Micrarchaeia	TACK	80	50	0	0	100	0	0	0	0	0	0
GCA_023485365.1_ASM2348536v1_genomic	GCA_023485365.1	Candidatus Marsarchaeota	Micrarchaeia	TACK	60	50	0	12.5	100	0	0	0	0	0	0
GCA_023379055.1_ASM2337905v1_genomic	GCA_023379055.1	Candidatus Marsarchaeota	Micrarchaeia	TACK	60	50	0	12.5	100	0	0	0	0	0	0
GCA_023485505.1_ASM2348550v1_genomic	GCA_023485505.1	Candidatus Marsarchaeota	Micrarchaeia	TACK	20	0	0	12.5	100	0	0	0	0	0	0
GCA_023484875.1_ASM2348487v1_genomic	GCA_023484875.1	Candidatus Marsarchaeota	Micrarchaeia	TACK	20	50	0	12.5	100	0	0	0	0	0	0
GCA_023380495.1_ASM2338049v1_genomic	GCA_023380495.1	Candidatus Marsarchaeota	Micrarchaeia	TACK	20	0	0	0	100	0	0	0	0	0	0
GCA_023473505.1_ASM2347350v1_genomic	GCA_023473505.1	Candidatus Marsarchaeota	Micrarchaeia	TACK	60	0	0	37.5	100	0	0	0	0	0	0
GCA_023473395.1_ASM2347339v1_genomic	GCA_023473395.1	Candidatus Marsarchaeota	Micrarchaeia	TACK	20	0	0	0	0	0	0	0	0	0	0
GCA_023485525.1_ASM2348552v1_genomic	GCA_023485525.1	Candidatus Marsarchaeota	Micrarchaeia	TACK	20	33.3	0	37.5	100	0	0	0	0	0	0
GCA_023473745.1_ASM2347374v1_genomic	GCA_023473745.1	Candidatus Marsarchaeota	Micrarchaeia	TACK	0	50	0	12.5	100	0	0	0	0	0	0
GCA_023473385.1_ASM2347338v1_genomic	GCA_023473385.1	Candidatus Marsarchaeota	Micrarchaeia	TACK	60	66.7	0	0	100	0	0	0	0	0	0
GCA_023474525.1_ASM2347452v1_genomic	GCA_023474525.1	Candidatus Marsarchaeota	Micrarchaeia	TACK	80	50	0	12.5	100	0	0	0	0	0	0
GCA_023380355.1_ASM2338035v1_genomic	GCA_023380355.1	Candidatus Marsarchaeota	Micrarchaeia	TACK	0	0	0	0	100	0	0	0	0	0	0
GCA_023380775.1_ASM2338077v1_genomic	GCA_023380775.1	Candidatus Marsarchaeota	Micrarchaeia	TACK	60	66.7	0	12.5	100	0	0	0	0	0	0
GCA_023484695.1_ASM2348469v1_genomic	GCA_023484695.1	Candidatus Marsarchaeota	Micrarchaeia	TACK	80	0	0	0	100	0	0	0	0	0	0
GCA_023379095.1_ASM2337909v1_genomic	GCA_023379095.1	Candidatus Marsarchaeota	Micrarchaeia	TACK	80	50	0	0	100	0	0	0	0	0	0
GCA_023485745.1_ASM2348574v1_genomic	GCA_023485745.1	Candidatus Marsarchaeota	Micrarchaeia	TACK	40	50	0	12.5	100	0	0	0	0	0	0
GCA_023474155.1_ASM2347415v1_genomic	GCA_023474155.1	Candidatus Marsarchaeota	Micrarchaeia	TACK	20	66.7	0	12.5	100	0	0	0	0	0	0
GCA_023381795.1_ASM2338179v1_genomic	GCA_023381795.1	Candidatus Marsarchaeota	Micrarchaeia	TACK	20	0	0	12.5	100	0	0	0	0	0	0
GCA_023474005.1_ASM2347400v1_genomic	GCA_023474005.1	Candidatus Marsarchaeota	Micrarchaeia	TACK	60	66.7	0	12.5	100	0	0	0	0	0	0
GCA_023487825.1_ASM2348782v1_genomic	GCA_023487825.1	Candidatus Marsarchaeota	Micrarchaeia	TACK	40	0	0	0	100	0	0	0	0	0	0
GCA_023379325.1_ASM2337932v1_genomic	GCA_023379325.1	Candidatus Marsarchaeota	Micrarchaeia	TACK	20	33.3	0	0	100	0	0	0	0	0	0
GCA_023476545.1_ASM2347654v1_genomic	GCA_023476545.1	Candidatus Marsarchaeota	Micrarchaeia	TACK	40	66.7	0	12.5	100	0	0	0	0	0	0
GCA_023485065.1_ASM2348506v1_genomic	GCA_023485065.1	Candidatus Marsarchaeota	Micrarchaeia	TACK	60	66.7	0	0	100	0	0	0	0	0	0
GCA_023485825.1_ASM2348582v1_genomic	GCA_023485825.1	Candidatus Marsarchaeota	Micrarchaeia	TACK	40	16.7	0	0	100	0	0	0	0	0	0
GCA_023380795.1_ASM2338079v1_genomic	GCA_023380795.1	Candidatus Marsarchaeota	Micrarchaeia	TACK	40	0	0	12.5	0	0	0	0	0	0	0
GCA_002763345.1_ASM276334v1_genomic	GCA_002763345.1	Candidatus Micrarchaeota	Micrarchaeia	DPANN	20	33.3	0	100	100	0	0	0	50	0	0
GCA_021801935.1_ASM2180193v1_genomic	GCA_021801935.1	Candidatus Micrarchaeota	Micrarchaeia	DPANN	40	66.7	0	12.5	100	0	0	0	0	0	0
GCA_021806185.1_ASM2180618v1_genomic	GCA_021806185.1	Candidatus Micrarchaeota	Micrarchaeia	DPANN	0	33.3	0	0	0	0	0	0	0	0	0
GCA_001871595.1_ASM187159v1_genomic	GCA_001871595.1	Candidatus Micrarchaeota	Micrarchaeia	DPANN	80	66.7	0	12.5	100	0	0	0	0	0	0
GCA_021800135.1_ASM2180013v1_genomic	GCA_021800135.1	Candidatus Micrarchaeota	Micrarchaeia	DPANN	0	16.7	0	12.5	0	0	0	0	0	0	0
GCA_021827525.1_ASM2182752v1_genomic	GCA_021827525.1	Candidatus Micrarchaeota	Micrarchaeia	DPANN	40	0	0	12.5	100	0	0	0	0	0	0
GCA_021795295.1_ASM2179529v1_genomic	GCA_021795295.1	Candidatus Micrarchaeota	Micrarchaeia	DPANN	40	33.3	0	37.5	100	0	0	0	0	0	0
GCA_001871655.1_ASM187165v1_genomic	GCA_001871655.1	Candidatus Micrarchaeota	Micrarchaeia	DPANN	60	66.7	0	0	100	0	0	0	0	0	0
GCA_021790455.1_ASM2179045v1_genomic	GCA_021790455.1	Candidatus Micrarchaeota	Micrarchaeia	DPANN	20	50	0	12.5	100	0	0	0	0	0	0
GCA_021785775.1_ASM2178577v1_genomic	GCA_021785775.1	Candidatus Micrarchaeota	Micrarchaeia	DPANN	0	16.7	0	0	100	0	0	0	0	0	0
GCA_021782355.1_ASM2178235v1_genomic	GCA_021782355.1	Candidatus Micrarchaeota	Micrarchaeia	DPANN	80	66.7	0	12.5	100	0	0	0	0	0	0
GCA_023247545.1_ASM2324754v1_genomic	GCA_023247545.1	Candidatus Micrarchaeota	Micrarchaeia	DPANN	0	16.7	0	12.5	100	0	0	0	0	0	0
GCA_021796915.1_ASM2179691v1_genomic	GCA_021796915.1	Candidatus Micrarchaeota	Micrarchaeia	DPANN	60	50	0	0	100	0	0	0	0	0	0
GCA_021803945.1_ASM2180394v1_genomic	GCA_021803945.1	Candidatus Micrarchaeota	Micrarchaeia	DPANN	100	66.7	0	12.5	100	0	0	0	0	0	0
GCA_021791535.1_ASM2179153v1_genomic	GCA_021791535.1	Candidatus Micrarchaeota	Micrarchaeia	DPANN	20	50	0	12.5	100	0	0	0	0	0	0
GCA_013332015.1_ASM1333201v1_genomic	GCA_013332015.1	Candidatus Micrarchaeota	Micrarchaeia	DPANN	80	66.7	0	25	100	100	0	0	0	33.3	0
GCA_002499405.1_ASM249940v1_genomic	GCA_002499405.1	Candidatus Micrarchaeota	Micrarchaeia	DPANN	60	66.7	0	12.5	0	0	0	0	0	0	0
GCA_021823025.1_ASM2182302v1_genomic	GCA_021823025.1	Candidatus Micrarchaeota	Micrarchaeia	DPANN	80	50	0	12.5	100	0	0	0	0	0	0
GCA_021792115.1_ASM2179211v1_genomic	GCA_021792115.1	Candidatus Micrarchaeota	Micrarchaeia	DPANN	60	66.7	0	0	100	0	0	0	0	0	0
GCA_021810685.1_ASM2181068v1_genomic	GCA_021810685.1	Candidatus Micrarchaeota	Micrarchaeia	DPANN	0	33.3	0	12.5	100	0	0	0	0	0	0
GCA_021792235.1_ASM2179223v1_genomic	GCA_021792235.1	Candidatus Micrarchaeota	Micrarchaeia	DPANN	60	66.7	0	12.5	100	0	0	0	0	0	0
GCA_016214445.1_ASM1621444v1_genomic	GCA_016214445.1	Candidatus Micrarchaeota	Micrarchaeia	DPANN	100	50	0	12.5	100	0	0	0	0	0	0
GCA_021823425.1_ASM2182342v1_genomic	GCA_021823425.1	Candidatus Micrarchaeota	Micrarchaeia	DPANN	80	66.7	0	12.5	100	0	0	0	0	33.3	0
GCA_013331535.1_ASM1333153v1_genomic	GCA_013331535.1	Candidatus Micrarchaeota	Micrarchaeia	DPANN	60	50	0	12.5	100	0	0	0	0	0	0
GCA_023247085.1_ASM2324708v1_genomic	GCA_023247085.1	Candidatus Micrarchaeota	Micrarchaeia	DPANN	80	66.7	0	25	100	0	0	0	0	0	0
GCA_021792175.1_ASM2179217v1_genomic	GCA_021792175.1	Candidatus Micrarchaeota	Micrarchaeia	DPANN	60	50	0	12.5	0	0	0	0	0	0	0
GCA_021811605.1_ASM2181160v1_genomic	GCA_021811605.1	Candidatus Micrarchaeota	Micrarchaeia	DPANN	20	50	0	12.5	100	0	0	0	0	0	0
GCA_023246885.1_ASM2324688v1_genomic	GCA_023246885.1	Candidatus Micrarchaeota	Micrarchaeia	DPANN	20	66.7	0	25	100	0	0	0	0	0	0
GCA_021832105.1_ASM2183210v1_genomic	GCA_021832105.1	Candidatus Micrarchaeota	Micrarchaeia	DPANN	40	50	0	12.5	100	0	0	0	0	0	0
GCA_021851025.1_ASM2185102v1_genomic	GCA_021851025.1	Candidatus Micrarchaeota	Micrarchaeia	DPANN	80	0	0	12.5	100	0	0	0	0	0	0
GCA_002763255.1_ASM276325v1_genomic	GCA_002763255.1	Candidatus Micrarchaeota	Micrarchaeia	DPANN	60	66.7	0	0	100	0	0	0	0	0	0
GCA_021786465.1_ASM2178646v1_genomic	GCA_021786465.1	Candidatus Micrarchaeota	Micrarchaeia	DPANN	80	66.7	0	12.5	100	0	0	0	0	0	0
GCA_002779685.1_ASM277968v1_genomic	GCA_002779685.1	Candidatus Micrarchaeota	Micrarchaeia	DPANN	60	66.7	0	25	100	100	0	0	0	0	0
GCA_021827995.1_ASM2182799v1_genomic	GCA_021827995.1	Candidatus Micrarchaeota	Micrarchaeia	DPANN	80	66.7	0	12.5	100	0	0	0	0	0	0
GCA_021789155.1_ASM2178915v1_genomic	GCA_021789155.1	Candidatus Micrarchaeota	Micrarchaeia	DPANN	20	50	0	12.5	100	0	0	0	0	0	0
GCA_016180665.1_ASM1618066v1_genomic	GCA_016180665.1	Candidatus Micrarchaeota	Micrarchaeia	DPANN	60	66.7	0	12.5	0	0	0	0	0	0	0
GCA_021846635.1_ASM2184663v1_genomic	GCA_021846635.1	Candidatus Micrarchaeota	Micrarchaeia	DPANN	80	33.3	0	12.5	100	0	0	0	0	0	0
GCA_016806735.1_ASM1680673v1_genomic	GCA_016806735.1	Candidatus Micrarchaeota	Micrarchaeia	DPANN	80	0	0	12.5	100	0	0	0	0	0	0
GCA_021810375.1_ASM2181037v1_genomic	GCA_021810375.1	Candidatus Micrarchaeota	Micrarchaeia	DPANN	0	0	0	25	100	0	0	0	0	0	0
GCA_021813025.1_ASM2181302v1_genomic	GCA_021813025.1	Candidatus Micrarchaeota	Micrarchaeia	DPANN	60	66.7	0	12.5	100	100	0	0	0	0	0
GCA_021784935.1_ASM2178493v1_genomic	GCA_021784935.1	Candidatus Micrarchaeota	Micrarchaeia	DPANN	20	16.7	0	0	100	0	0	0	0	0	0
GCA_023256535.1_ASM2325653v1_genomic	GCA_023256535.1	Candidatus Micrarchaeota	Micrarchaeia	DPANN	40	33.3	0	0	100	0	0	0	0	0	0
GCA_021816785.1_ASM2181678v1_genomic	GCA_021816785.1	Candidatus Micrarchaeota	Micrarchaeia	DPANN	40	66.7	0	12.5	100	0	0	0	0	0	0
GCA_021845445.1_ASM2184544v1_genomic	GCA_021845445.1	Candidatus Micrarchaeota	Micrarchaeia	DPANN	40	66.7	0	12.5	0	0	0	0	0	0	0
GCA_021823945.1_ASM2182394v1_genomic	GCA_021823945.1	Candidatus Micrarchaeota	Micrarchaeia	DPANN	60	33.3	0	25	100	100	0	0	0	0	0
GCA_002792935.1_ASM279293v1_genomic	GCA_002792935.1	Candidatus Micrarchaeota	Micrarchaeia	DPANN	20	0	0	12.5	100	0	0	0	0	0	0
GCA_021827955.1_ASM2182795v1_genomic	GCA_021827955.1	Candidatus Micrarchaeota	Micrarchaeia	DPANN	0	50	0	12.5	100	0	0	0	0	0	0
GCA_023270025.1_ASM2327002v1_genomic	GCA_023270025.1	Candidatus Micrarchaeota	Micrarchaeia	DPANN	60	33.3	0	12.5	100	0	0	0	0	0	0
GCA_021844845.1_ASM2184484v1_genomic	GCA_021844845.1	Candidatus Micrarchaeota	Micrarchaeia	DPANN	20	50	0	12.5	100	0	0	0	100	0	0
GCA_021788285.1_ASM2178828v1_genomic	GCA_021788285.1	Candidatus Micrarchaeota	Micrarchaeia	DPANN	40	0	0	12.5	100	0	0	0	0	0	0
GCA_021791775.1_ASM2179177v1_genomic	GCA_021791775.1	Candidatus Micrarchaeota	Micrarchaeia	DPANN	20	0	0	12.5	100	0	0	0	0	0	0
GCA_021791725.1_ASM2179172v1_genomic	GCA_021791725.1	Candidatus Micrarchaeota	Micrarchaeia	DPANN	80	66.7	0	12.5	100	0	0	0	0	0	0
GCA_020723065.1_ASM2072306v1_genomic	GCA_020723065.1	Candidatus Micrarchaeota	Micrarchaeia	DPANN	20	16.7	0	100	100	0	0	0	0	0	0
GCA_021845045.1_ASM2184504v1_genomic	GCA_021845045.1	Candidatus Micrarchaeota	Micrarchaeia	DPANN	80	66.7	0	0	100	0	0	0	0	0	0
GCA_021834745.1_ASM2183474v1_genomic	GCA_021834745.1	Candidatus Micrarchaeota	Micrarchaeia	DPANN	60	50	0	12.5	100	0	0	0	0	0	0
GCA_021785375.1_ASM2178537v1_genomic	GCA_021785375.1	Candidatus Micrarchaeota	Micrarchaeia	DPANN	60	50	0	12.5	100	0	0	0	0	0	0
GCA_013330065.1_ASM1333006v1_genomic	GCA_013330065.1	Candidatus Micrarchaeota	Micrarchaeia	DPANN	20	50	0	12.5	0	0	0	0	0	0	0
GCA_020723045.1_ASM2072304v1_genomic	GCA_020723045.1	Candidatus Micrarchaeota	Micrarchaeia	DPANN	80	66.7	0	12.5	100	0	0	0	0	0	0
GCA_002502725.1_ASM250272v1_genomic	GCA_002502725.1	Candidatus Micrarchaeota	Micrarchaeia	DPANN	80	50	0	12.5	100	0	0	0	0	0	0
GCA_021792295.1_ASM2179229v1_genomic	GCA_021792295.1	Candidatus Micrarchaeota	Micrarchaeia	DPANN	0	16.7	0	37.5	100	0	0	0	0	0	0
GCA_001871475.1_ASM187147v1_genomic	GCA_001871475.1	Candidatus Micrarchaeota	Micrarchaeia	DPANN	80	50	0	12.5	100	100	0	0	0	0	0
GCA_021654395.1_ARM1_1.0_genomic	GCA_021654395.1	Candidatus Micrarchaeota	Micrarchaeia	DPANN	80	66.7	0	0	100	0	0	0	0	0	0
GCA_021831375.1_ASM2183137v1_genomic	GCA_021831375.1	Candidatus Micrarchaeota	Micrarchaeia	DPANN	40	0	0	12.5	100	0	0	0	0	0	0
GCA_021811535.1_ASM2181153v1_genomic	GCA_021811535.1	Candidatus Micrarchaeota	Micrarchaeia	DPANN	80	50	0	12.5	0	0	0	0	0	0	0
GCA_021806085.1_ASM2180608v1_genomic	GCA_021806085.1	Candidatus Micrarchaeota	Micrarchaeia	DPANN	40	50	0	0	100	0	0	0	0	0	0
GCA_002785255.1_ASM278525v1_genomic	GCA_002785255.1	Candidatus Micrarchaeota	Micrarchaeia	DPANN	40	66.7	0	0	100	0	0	0	0	0	0
GCA_021804305.1_ASM2180430v1_genomic	GCA_021804305.1	Candidatus Micrarchaeota	Micrarchaeia	DPANN	20	33.3	0	12.5	100	0	0	0	0	0	0
GCA_021829405.1_ASM2182940v1_genomic	GCA_021829405.1	Candidatus Micrarchaeota	Micrarchaeia	DPANN	60	0	0	12.5	100	0	0	0	0	0	0
GCA_021816645.1_ASM2181664v1_genomic	GCA_021816645.1	Candidatus Micrarchaeota	Micrarchaeia	DPANN	0	0	0	0	100	0	0	0	0	0	0
GCA_023270015.1_ASM2327001v1_genomic	GCA_023270015.1	Candidatus Micrarchaeota	Micrarchaeia	DPANN	40	50	0	12.5	100	0	0	0	0	0	0
GCA_021831285.1_ASM2183128v1_genomic	GCA_021831285.1	Candidatus Micrarchaeota	Micrarchaeia	DPANN	20	16.7	0	50	0	0	0	0	0	0	0
GCA_021791075.1_ASM2179107v1_genomic	GCA_021791075.1	Candidatus Micrarchaeota	Micrarchaeia	DPANN	60	66.7	0	12.5	100	0	0	0	0	0	0
GCA_002214165.1_ASM221416v1_genomic	GCA_002214165.1	Candidatus Micrarchaeota	Micrarchaeia	DPANN	100	50	0	12.5	100	0	0	0	0	0	0
GCA_021793455.1_ASM2179345v1_genomic	GCA_021793455.1	Candidatus Micrarchaeota	Micrarchaeia	DPANN	40	50	0	12.5	100	0	0	0	0	0	0
GCA_023246685.1_ASM2324668v1_genomic	GCA_023246685.1	Candidatus Micrarchaeota	Micrarchaeia	DPANN	80	66.7	0	12.5	0	0	0	0	0	0	0
GCA_021797995.1_ASM2179799v1_genomic	GCA_021797995.1	Candidatus Micrarchaeota	Micrarchaeia	DPANN	20	33.3	0	100	100	0	0	0	0	0	0
GCA_021817505.1_ASM2181750v1_genomic	GCA_021817505.1	Candidatus Micrarchaeota	Micrarchaeia	DPANN	40	33.3	100	100	100	0	0	0	0	0	0
GCA_021835105.1_ASM2183510v1_genomic	GCA_021835105.1	Candidatus Micrarchaeota	Micrarchaeia	DPANN	60	66.7	0	12.5	100	0	0	0	0	0	0
GCA_023256495.1_ASM2325649v1_genomic	GCA_023256495.1	Candidatus Micrarchaeota	Micrarchaeia	DPANN	40	50	0	0	100	0	0	0	0	0	0
GCA_021790175.1_ASM2179017v1_genomic	GCA_021790175.1	Candidatus Micrarchaeota	Micrarchaeia	DPANN	20	50	0	12.5	100	0	0	0	0	0	0
GCA_021804105.1_ASM2180410v1_genomic	GCA_021804105.1	Candidatus Micrarchaeota	Micrarchaeia	DPANN	0	0	0	0	100	0	0	0	0	0	0
GCA_021850955.1_ASM2185095v1_genomic	GCA_021850955.1	Candidatus Micrarchaeota	Micrarchaeia	DPANN	40	16.7	0	0	100	0	0	0	0	0	0
GCA_021850625.1_ASM2185062v1_genomic	GCA_021850625.1	Candidatus Micrarchaeota	Micrarchaeia	DPANN	40	66.7	0	0	100	0	0	0	0	0	0
GCA_021830875.1_ASM2183087v1_genomic	GCA_021830875.1	Candidatus Micrarchaeota	Micrarchaeia	DPANN	20	33.3	0	12.5	100	0	0	0	0	0	0
GCA_021852055.1_ASM2185205v1_genomic	GCA_021852055.1	Candidatus Micrarchaeota	Micrarchaeia	DPANN	60	50	0	12.5	100	0	0	0	0	0	0
GCA_002785565.1_ASM278556v1_genomic	GCA_002785565.1	Candidatus Micrarchaeota	Micrarchaeia	DPANN	60	50	0	12.5	0	0	0	0	0	0	0
GCA_021845465.1_ASM2184546v1_genomic	GCA_021845465.1	Candidatus Micrarchaeota	Micrarchaeia	DPANN	60	66.7	0	12.5	100	0	0	0	0	0	0
GCA_002507385.1_ASM250738v1_genomic	GCA_002507385.1	Candidatus Micrarchaeota	Micrarchaeia	DPANN	80	66.7	0	12.5	100	0	0	0	0	0	0
GCA_001871535.1_ASM187153v1_genomic	GCA_001871535.1	Candidatus Micrarchaeota	Micrarchaeia	DPANN	60	66.7	0	25	100	0	0	0	0	0	0
GCA_021815555.1_ASM2181555v1_genomic	GCA_021815555.1	Candidatus Micrarchaeota	Micrarchaeia	DPANN	100	66.7	0	0	100	0	0	0	0	0	0
GCA_002505035.1_ASM250503v1_genomic	GCA_002505035.1	Candidatus Micrarchaeota	Micrarchaeia	DPANN	60	66.7	0	0	100	0	0	0	0	0	0
GCA_021801505.1_ASM2180150v1_genomic	GCA_021801505.1	Candidatus Micrarchaeota	Micrarchaeia	DPANN	20	50	0	25	0	0	0	0	0	0	0
GCA_021796585.1_ASM2179658v1_genomic	GCA_021796585.1	Candidatus Micrarchaeota	Micrarchaeia	DPANN	20	33.3	0	0	100	0	0	0	0	0	0
GCA_013331595.1_ASM1333159v1_genomic	GCA_013331595.1	Candidatus Micrarchaeota	Micrarchaeia	DPANN	60	66.7	0	12.5	100	0	0	0	50	0	0
GCA_023248455.1_ASM2324845v1_genomic	GCA_023248455.1	Candidatus Micrarchaeota	Micrarchaeia	DPANN	60	66.7	0	12.5	0	0	0	0	0	33.3	0
GCA_013426015.1_ASM1342601v1_genomic	GCA_013426015.1	Candidatus Micrarchaeota	Micrarchaeia	DPANN	60	50	0	12.5	100	0	0	0	0	0	0
GCA_021835325.1_ASM2183532v1_genomic	GCA_021835325.1	Candidatus Micrarchaeota	Micrarchaeia	DPANN	60	50	0	12.5	0	0	0	0	0	0	0
GCA_021805625.1_ASM2180562v1_genomic	GCA_021805625.1	Candidatus Micrarchaeota	Micrarchaeia	DPANN	20	33.3	0	12.5	100	0	0	0	0	0	0
GCA_023247345.1_ASM2324734v1_genomic	GCA_023247345.1	Candidatus Micrarchaeota	Micrarchaeia	DPANN	40	66.7	0	12.5	0	0	0	0	0	0	0
GCA_021800515.1_ASM2180051v1_genomic	GCA_021800515.1	Candidatus Micrarchaeota	Micrarchaeia	DPANN	60	66.7	0	0	100	0	0	0	0	0	0
GCA_021836245.1_ASM2183624v1_genomic	GCA_021836245.1	Candidatus Micrarchaeota	Micrarchaeia	DPANN	0	16.7	0	0	100	0	0	0	0	0	0
GCA_021792775.1_ASM2179277v1_genomic	GCA_021792775.1	Candidatus Micrarchaeota	Micrarchaeia	DPANN	80	16.7	0	0	100	0	0	0	0	0	0
GCA_021848125.1_ASM2184812v1_genomic	GCA_021848125.1	Candidatus Micrarchaeota	Micrarchaeia	DPANN	20	66.7	0	12.5	100	0	0	0	0	0	0
GCA_021798255.1_ASM2179825v1_genomic	GCA_021798255.1	Candidatus Micrarchaeota	Micrarchaeia	DPANN	100	50	0	12.5	100	0	0	0	0	0	0
GCA_023248235.1_ASM2324823v1_genomic	GCA_023248235.1	Candidatus Micrarchaeota	Micrarchaeia	DPANN	40	50	0	25	100	0	0	0	0	0	0
GCA_021835385.1_ASM2183538v1_genomic	GCA_021835385.1	Candidatus Micrarchaeota	Micrarchaeia	DPANN	40	66.7	0	12.5	100	0	0	0	0	0	0
GCA_002778425.1_ASM277842v1_genomic	GCA_002778425.1	Candidatus Micrarchaeota	Micrarchaeia	DPANN	0	33.3	0	100	100	0	0	0	50	0	0
GCA_021837285.1_ASM2183728v1_genomic	GCA_021837285.1	Candidatus Micrarchaeota	Micrarchaeia	DPANN	40	0	0	12.5	100	0	0	0	0	0	0
GCA_002792915.1_ASM279291v1_genomic	GCA_002792915.1	Candidatus Micrarchaeota	Micrarchaeia	DPANN	40	66.7	0	0	0	0	0	0	0	0	0
GCA_021789075.1_ASM2178907v1_genomic	GCA_021789075.1	Candidatus Micrarchaeota	Micrarchaeia	DPANN	40	66.7	0	0	100	0	0	0	0	0	0
GCA_021834785.1_ASM2183478v1_genomic	GCA_021834785.1	Candidatus Micrarchaeota	Micrarchaeia	DPANN	60	0	0	0	100	0	0	0	0	0	0
GCA_021812055.1_ASM2181205v1_genomic	GCA_021812055.1	Candidatus Micrarchaeota	Micrarchaeia	DPANN	40	16.7	0	50	100	0	0	0	0	0	0
GCA_020726005.1_ASM2072600v1_genomic	GCA_020726005.1	Candidatus Micrarchaeota	Micrarchaeia	DPANN	80	50	0	12.5	100	0	0	0	0	0	0
GCA_021785805.1_ASM2178580v1_genomic	GCA_021785805.1	Candidatus Micrarchaeota	Micrarchaeia	DPANN	60	50	0	12.5	100	0	0	0	0	0	0
GCA_021834865.1_ASM2183486v1_genomic	GCA_021834865.1	Candidatus Micrarchaeota	Micrarchaeia	DPANN	80	50	0	0	100	0	0	0	0	0	0
GCA_021791245.1_ASM2179124v1_genomic	GCA_021791245.1	Candidatus Micrarchaeota	Micrarchaeia	DPANN	60	66.7	0	12.5	100	0	0	0	0	0	0
GCA_001871495.1_ASM187149v1_genomic	GCA_001871495.1	Candidatus Micrarchaeota	Micrarchaeia	DPANN	60	50	0	12.5	100	0	0	0	0	0	0
GCA_002778455.1_ASM277845v1_genomic	GCA_002778455.1	Candidatus Micrarchaeota	Micrarchaeia	DPANN	80	66.7	0	12.5	100	100	0	0	0	0	0
GCA_021793035.1_ASM2179303v1_genomic	GCA_021793035.1	Candidatus Micrarchaeota	Micrarchaeia	DPANN	40	66.7	0	12.5	100	0	0	0	0	0	0
GCA_023256515.1_ASM2325651v1_genomic	GCA_023256515.1	Candidatus Micrarchaeota	Micrarchaeia	DPANN	20	50	0	12.5	100	0	0	0	0	0	0
GCA_016214495.1_ASM1621449v1_genomic	GCA_016214495.1	Candidatus Micrarchaeota	Micrarchaeia	DPANN	20	33.3	0	12.5	0	0	0	0	0	0	0
GCA_021845205.1_ASM2184520v1_genomic	GCA_021845205.1	Candidatus Micrarchaeota	Micrarchaeia	DPANN	60	66.7	0	0	100	0	0	0	0	0	0
GCA_002498635.1_ASM249863v1_genomic	GCA_002498635.1	Candidatus Micrarchaeota	Micrarchaeia	DPANN	80	0	0	12.5	100	0	0	0	0	0	0
GCA_021835545.1_ASM2183554v1_genomic	GCA_021835545.1	Candidatus Micrarchaeota	Micrarchaeia	DPANN	80	16.7	0	12.5	0	0	0	0	0	0	0
GCA_013330215.1_ASM1333021v1_genomic	GCA_013330215.1	Candidatus Micrarchaeota	Micrarchaeia	DPANN	0	0	0	75	100	0	0	0	0	0	0
GCA_021788275.1_ASM2178827v1_genomic	GCA_021788275.1	Candidatus Micrarchaeota	Micrarchaeia	DPANN	0	33.3	0	0	100	0	0	0	0	0	0
GCA_021801785.1_ASM2180178v1_genomic	GCA_021801785.1	Candidatus Micrarchaeota	Micrarchaeia	DPANN	80	66.7	0	0	100	0	0	0	0	0	0
GCA_002792955.1_ASM279295v1_genomic	GCA_002792955.1	Candidatus Micrarchaeota	Micrarchaeia	DPANN	60	66.7	0	25	100	100	0	0	0	0	0
GCA_021851555.1_ASM2185155v1_genomic	GCA_021851555.1	Candidatus Micrarchaeota	Micrarchaeia	DPANN	40	66.7	0	12.5	100	0	0	0	0	0	0
GCA_016214485.1_ASM1621448v1_genomic	GCA_016214485.1	Candidatus Micrarchaeota	Micrarchaeia	DPANN	60	66.7	0	12.5	100	100	0	0	0	0	0
GCA_021830005.1_ASM2183000v1_genomic	GCA_021830005.1	Candidatus Micrarchaeota	Micrarchaeia	DPANN	100	66.7	0	0	100	0	0	0	0	0	0
GCA_021851845.1_ASM2185184v1_genomic	GCA_021851845.1	Candidatus Micrarchaeota	Micrarchaeia	DPANN	20	50	0	12.5	100	0	0	0	0	0	0
GCA_021821445.1_ASM2182144v1_genomic	GCA_021821445.1	Candidatus Micrarchaeota	Micrarchaeia	DPANN	100	66.7	0	12.5	100	0	0	0	0	0	0
GCA_021818995.1_ASM2181899v1_genomic	GCA_021818995.1	Candidatus Micrarchaeota	Micrarchaeia	DPANN	40	0	0	12.5	100	0	0	0	0	33.3	0
GCA_021830585.1_ASM2183058v1_genomic	GCA_021830585.1	Candidatus Micrarchaeota	Micrarchaeia	DPANN	100	66.7	0	12.5	100	0	0	0	0	0	0
GCA_002778915.1_ASM277891v1_genomic	GCA_002778915.1	Candidatus Micrarchaeota	Micrarchaeia	DPANN	60	66.7	0	25	100	100	0	0	0	0	0
GCA_021819045.1_ASM2181904v1_genomic	GCA_021819045.1	Candidatus Micrarchaeota	Micrarchaeia	DPANN	40	50	0	0	0	0	0	0	0	0	0
GCA_021806095.1_ASM2180609v1_genomic	GCA_021806095.1	Candidatus Micrarchaeota	Micrarchaeia	DPANN	20	50	0	12.5	100	0	0	0	0	0	0
GCA_021812565.1_ASM2181256v1_genomic	GCA_021812565.1	Candidatus Micrarchaeota	Micrarchaeia	DPANN	80	50	0	0	100	0	0	0	0	0	0
GCA_002503145.1_ASM250314v1_genomic	GCA_002503145.1	Candidatus Micrarchaeota	Micrarchaeia	DPANN	80	0	0	12.5	100	0	0	0	0	0	0
GCA_021790305.1_ASM2179030v1_genomic	GCA_021790305.1	Candidatus Micrarchaeota	Micrarchaeia	DPANN	40	33.3	100	37.5	100	0	0	0	0	0	0
GCA_021801385.1_ASM2180138v1_genomic	GCA_021801385.1	Candidatus Micrarchaeota	Micrarchaeia	DPANN	0	16.7	0	25	100	0	0	0	0	0	0
GCA_002763205.1_ASM276320v1_genomic	GCA_002763205.1	Candidatus Micrarchaeota	Micrarchaeia	DPANN	40	66.7	0	0	0	0	0	0	0	0	0
GCA_002763275.1_ASM276327v1_genomic	GCA_002763275.1	Candidatus Micrarchaeota	Micrarchaeia	DPANN	20	66.7	0	12.5	0	0	0	0	0	0	0
GCA_023270055.1_ASM2327005v1_genomic	GCA_023270055.1	Candidatus Micrarchaeota	Micrarchaeia	DPANN	60	50	0	12.5	100	0	0	0	0	0	0
GCA_021828155.1_ASM2182815v1_genomic	GCA_021828155.1	Candidatus Micrarchaeota	Micrarchaeia	DPANN	20	16.7	0	12.5	100	0	0	0	0	0	0
GCA_021807115.1_ASM2180711v1_genomic	GCA_021807115.1	Candidatus Micrarchaeota	Micrarchaeia	DPANN	60	66.7	0	12.5	100	0	0	0	0	0	0
GCA_021828345.1_ASM2182834v1_genomic	GCA_021828345.1	Candidatus Micrarchaeota	Micrarchaeia	DPANN	60	33.3	0	75	100	0	0	0	0	0	0
GCA_021821805.1_ASM2182180v1_genomic	GCA_021821805.1	Candidatus Micrarchaeota	Micrarchaeia	DPANN	20	50	0	12.5	0	0	0	0	0	0	0
GCA_021846425.1_ASM2184642v1_genomic	GCA_021846425.1	Candidatus Micrarchaeota	Micrarchaeia	DPANN	20	33.3	0	87.5	0	0	0	0	0	0	0
GCA_021851535.1_ASM2185153v1_genomic	GCA_021851535.1	Candidatus Micrarchaeota	Micrarchaeia	DPANN	20	0	0	62.5	100	0	0	0	0	0	0
GCA_009387755.1_ASM938775v1_genomic	GCA_009387755.1	Candidatus Micrarchaeota	Micrarchaeia	DPANN	80	66.7	0	12.5	100	0	0	0	0	0	0
GCA_002499375.1_ASM249937v1_genomic	GCA_002499375.1	Candidatus Micrarchaeota	Micrarchaeia	DPANN	80	50	0	12.5	100	100	0	0	0	0	0
GCA_021810445.1_ASM2181044v1_genomic	GCA_021810445.1	Candidatus Micrarchaeota	Micrarchaeia	DPANN	0	0	0	12.5	100	0	0	0	0	0	0
GCA_023248035.1_ASM2324803v1_genomic	GCA_023248035.1	Candidatus Micrarchaeota	Micrarchaeia	DPANN	60	66.7	0	12.5	100	100	0	0	0	0	0
GCA_021801765.1_ASM2180176v1_genomic	GCA_021801765.1	Candidatus Micrarchaeota	Micrarchaeia	DPANN	60	66.7	0	12.5	100	0	0	0	0	0	0
GCA_021786935.1_ASM2178693v1_genomic	GCA_021786935.1	Candidatus Micrarchaeota	Micrarchaeia	DPANN	100	66.7	0	12.5	100	0	0	0	0	0	0
GCA_021812205.1_ASM2181220v1_genomic	GCA_021812205.1	Candidatus Micrarchaeota	Micrarchaeia	DPANN	20	0	0	12.5	100	0	0	0	0	0	0
GCA_021804095.1_ASM2180409v1_genomic	GCA_021804095.1	Candidatus Micrarchaeota	Micrarchaeia	DPANN	60	66.7	0	12.5	100	0	0	0	0	0	0
GCA_021792395.1_ASM2179239v1_genomic	GCA_021792395.1	Candidatus Micrarchaeota	Micrarchaeia	DPANN	80	0	0	12.5	100	0	0	0	0	0	0
GCA_021796295.1_ASM2179629v1_genomic	GCA_021796295.1	Candidatus Micrarchaeota	Micrarchaeia	DPANN	0	66.7	0	12.5	100	0	0	0	0	0	0
GCA_021848025.1_ASM2184802v1_genomic	GCA_021848025.1	Candidatus Micrarchaeota	Micrarchaeia	DPANN	60	66.7	0	12.5	100	0	0	0	0	0	0
GCA_002503225.1_ASM250322v1_genomic	GCA_002503225.1	Candidatus Micrarchaeota	Micrarchaeia	DPANN	60	50	0	12.5	100	0	0	0	0	0	0
GCA_021811465.1_ASM2181146v1_genomic	GCA_021811465.1	Candidatus Micrarchaeota	Micrarchaeia	DPANN	60	66.7	0	37.5	100	0	0	0	0	0	0
GCA_021803425.1_ASM2180342v1_genomic	GCA_021803425.1	Candidatus Micrarchaeota	Micrarchaeia	DPANN	80	66.7	0	12.5	100	0	0	0	0	0	0
GCA_021823145.1_ASM2182314v1_genomic	GCA_021823145.1	Candidatus Micrarchaeota	Micrarchaeia	DPANN	0	16.7	0	37.5	100	0	0	0	0	0	0
GCA_021817305.1_ASM2181730v1_genomic	GCA_021817305.1	Candidatus Micrarchaeota	Micrarchaeia	DPANN	60	66.7	0	12.5	100	0	0	0	0	0	0
GCA_002505655.1_ASM250565v1_genomic	GCA_002505655.1	Candidatus Micrarchaeota	Micrarchaeia	DPANN	80	66.7	0	12.5	100	0	0	0	0	0	0
GCA_021835425.1_ASM2183542v1_genomic	GCA_021835425.1	Candidatus Micrarchaeota	Micrarchaeia	DPANN	60	33.3	0	0	100	0	0	0	0	0	0
GCA_023247775.1_ASM2324777v1_genomic	GCA_023247775.1	Candidatus Micrarchaeota	Micrarchaeia	DPANN	20	66.7	0	12.5	100	0	0	0	0	0	0
GCA_021811705.1_ASM2181170v1_genomic	GCA_021811705.1	Candidatus Micrarchaeota	Micrarchaeia	DPANN	0	16.7	0	0	100	0	0	0	0	0	0
GCA_021825125.1_ASM2182512v1_genomic	GCA_021825125.1	Candidatus Micrarchaeota	Micrarchaeia	DPANN	80	50	0	25	100	0	0	0	0	0	0
GCA_013330615.1_ASM1333061v1_genomic	GCA_013330615.1	Candidatus Micrarchaeota	Micrarchaeia	DPANN	0	0	0	75	100	0	0	0	0	0	0
GCA_023267785.1_ASM2326778v1_genomic	GCA_023267785.1	Candidatus Micrarchaeota	Micrarchaeia	DPANN	40	33.3	0	0	100	0	0	0	0	0	0
GCA_021822165.1_ASM2182216v1_genomic	GCA_021822165.1	Candidatus Micrarchaeota	Micrarchaeia	DPANN	60	66.7	0	0	100	0	0	0	0	0	0
GCA_021812025.1_ASM2181202v1_genomic	GCA_021812025.1	Candidatus Micrarchaeota	Micrarchaeia	DPANN	20	0	0	12.5	100	0	0	0	0	0	0
GCA_021846375.1_ASM2184637v1_genomic	GCA_021846375.1	Candidatus Micrarchaeota	Micrarchaeia	DPANN	80	50	0	12.5	100	0	0	0	0	0	0
GCA_013331805.1_ASM1333180v1_genomic	GCA_013331805.1	Candidatus Micrarchaeota	Micrarchaeia	DPANN	20	66.7	0	12.5	100	0	0	0	0	33.3	0
GCA_023248665.1_ASM2324866v1_genomic	GCA_023248665.1	Candidatus Micrarchaeota	Micrarchaeia	DPANN	60	50	0	12.5	0	100	0	0	0	0	0
GCA_021835515.1_ASM2183551v1_genomic	GCA_021835515.1	Candidatus Micrarchaeota	Micrarchaeia	DPANN	60	66.7	0	12.5	100	0	0	0	0	0	0
GCA_021850375.1_ASM2185037v1_genomic	GCA_021850375.1	Candidatus Micrarchaeota	Micrarchaeia	DPANN	0	0	0	25	0	0	0	0	0	0	0
GCA_021823435.1_ASM2182343v1_genomic	GCA_021823435.1	Candidatus Micrarchaeota	Micrarchaeia	DPANN	20	16.7	0	12.5	100	0	0	0	0	0	0
GCA_021836925.1_ASM2183692v1_genomic	GCA_021836925.1	Candidatus Micrarchaeota	Micrarchaeia	DPANN	0	0	0	0	100	0	0	0	0	0	0
GCA_001889985.1_ASM188998v1_genomic	GCA_001889985.1	Candidatus Micrarchaeota	Micrarchaeia	DPANN	80	0	0	12.5	100	0	0	0	0	0	0
GCA_021827825.1_ASM2182782v1_genomic	GCA_021827825.1	Candidatus Micrarchaeota	Micrarchaeia	DPANN	60	66.7	0	37.5	100	0	0	0	0	0	0
GCA_021835365.1_ASM2183536v1_genomic	GCA_021835365.1	Candidatus Micrarchaeota	Micrarchaeia	DPANN	0	33.3	0	12.5	0	0	0	0	0	0	0
GCA_017610505.1_ASM1761050v1_genomic.fna.faa	GCA_017610505.1	Stenosarchaea group	Nanoarchaeia	Eukyarchaea	0	33.3	0	50	100	0	0	0	0	0	0
GCA_020430505.1_ASM2043050v1_genomic	GCA_020430505.1	Nanoarchaeota	Nanoarchaeia	DPANN	20	33.3	0	0	0	0	0	0	0	0	0
GCA_013331965.1_ASM1333196v1_genomic	GCA_013331965.1	Candidatus Woesearchaeota	Nanoarchaeia	DPANN	0	0	0	0	0	0	0	0	0	0	0
GCA_023269965.1_ASM2326996v1_genomic	GCA_023269965.1	Candidatus Parvarchaeota	Nanoarchaeia	DPANN	20	0	0	0	0	0	0	0	0	0	0
GCA_016181865.1_ASM1618186v1_genomic	GCA_016181865.1	Candidatus Pacearchaeota	Nanoarchaeia	DPANN	0	0	0	0	0	0	0	0	0	0	0
GCA_021798355.1_ASM2179835v1_genomic	GCA_021798355.1	Nanoarchaeota	Nanoarchaeia	DPANN	20	0	0	0	0	0	0	0	0	0	0
GCA_018303185.1_ASM1830318v1_genomic	GCA_018303185.1	Candidatus Woesearchaeota	Nanoarchaeia	DPANN	60	33.3	0	100	100	0	0	0	0	0	0
GCA_001552015.1_ASM155201v1_genomic	GCA_001552015.1	Nanoarchaeota	Nanoarchaeia	DPANN	0	0	0	0	0	0	0	0	0	0	0
GCA_021781015.1_ASM2178101v1_genomic	GCA_021781015.1	Nanoarchaeota	Nanoarchaeia	DPANN	0	33.3	0	0	0	0	0	0	0	0	0
GCA_017608675.1_ASM1760867v1_genomic	GCA_017608675.1	Candidatus Woesearchaeota	Nanoarchaeia	DPANN	0	66.7	0	25	100	0	0	0	50	0	0
GCA_023266895.1_ASM2326689v1_genomic	GCA_023266895.1	Candidatus Woesearchaeota	Nanoarchaeia	DPANN	20	0	0	12.5	0	0	0	0	0	0	0
GCA_002763155.1_ASM276315v1_genomic	GCA_002763155.1	Candidatus Pacearchaeota	Nanoarchaeia	DPANN	0	0	0	12.5	0	0	0	0	0	0	0
GCA_017608555.1_ASM1760855v1_genomic	GCA_017608555.1	Candidatus Pacearchaeota	Nanoarchaeia	DPANN	0	0	0	12.5	0	0	0	0	0	0	0
GCA_013331945.1_ASM1333194v1_genomic	GCA_013331945.1	Nanoarchaeota	Nanoarchaeia	DPANN	0	0	0	25	0	0	0	0	50	0	0
GCA_018302725.1_ASM1830272v1_genomic	GCA_018302725.1	Candidatus Woesearchaeota	Nanoarchaeia	DPANN	0	0	0	0	0	0	0	0	0	0	0
GCA_013331695.1_ASM1333169v1_genomic	GCA_013331695.1	Candidatus Woesearchaeota	Nanoarchaeia	DPANN	20	16.7	0	12.5	0	0	0	0	0	0	0
GCA_018304325.1_ASM1830432v1_genomic	GCA_018304325.1	Candidatus Pacearchaeota	Nanoarchaeia	DPANN	0	0	0	12.5	0	0	0	0	50	0	0
GCA_017608355.1_ASM1760835v1_genomic	GCA_017608355.1	Candidatus Pacearchaeota	Nanoarchaeia	DPANN	20	33.3	0	12.5	100	0	0	0	0	0	0
GCA_017609045.1_ASM1760904v1_genomic	GCA_017609045.1	Candidatus Pacearchaeota	Nanoarchaeia	DPANN	0	0	0	0	0	0	0	0	0	0	0
GCA_018303645.1_ASM1830364v1_genomic	GCA_018303645.1	Candidatus Woesearchaeota	Nanoarchaeia	DPANN	40	0	0	100	0	0	0	0	0	0	0
GCA_017608455.1_ASM1760845v1_genomic	GCA_017608455.1	Candidatus Woesearchaeota	Nanoarchaeia	DPANN	0	66.7	0	12.5	100	0	0	0	0	0	0
GCA_017609565.1_ASM1760956v1_genomic	GCA_017609565.1	Candidatus Woesearchaeota	Nanoarchaeia	DPANN	0	0	0	0	0	0	0	0	0	0	0
GCA_023267155.1_ASM2326715v1_genomic	GCA_023267155.1	Candidatus Woesearchaeota	Nanoarchaeia	DPANN	0	0	0	12.5	0	0	0	0	0	0	0
GCA_016185635.1_ASM1618563v1_genomic	GCA_016185635.1	Candidatus Woesearchaeota	Nanoarchaeia	DPANN	0	33.3	0	0	0	0	0	0	0	0	0
GCA_017607955.1_ASM1760795v1_genomic	GCA_017607955.1	Candidatus Woesearchaeota	Nanoarchaeia	DPANN	0	16.7	0	37.5	100	0	0	0	0	0	0
GCA_013329235.1_ASM1332923v1_genomic	GCA_013329235.1	Nanoarchaeota	Nanoarchaeia	DPANN	0	33.3	0	0	0	0	0	0	0	0	0
GCA_017608225.1_ASM1760822v1_genomic	GCA_017608225.1	Candidatus Woesearchaeota	Nanoarchaeia	DPANN	20	33.3	0	0	100	0	0	0	0	0	0
GCA_002763285.1_ASM276328v1_genomic	GCA_002763285.1	Candidatus Pacearchaeota	Nanoarchaeia	DPANN	0	0	0	0	100	0	0	0	0	0	0
GCA_017609885.1_ASM1760988v1_genomic	GCA_017609885.1	Candidatus Pacearchaeota	Nanoarchaeia	DPANN	0	0	0	12.5	0	0	0	0	0	0	0
GCA_017609345.1_ASM1760934v1_genomic	GCA_017609345.1	Candidatus Pacearchaeota	Nanoarchaeia	DPANN	0	0	0	12.5	0	0	0	0	0	0	0
GCA_017609585.1_ASM1760958v1_genomic	GCA_017609585.1	Candidatus Woesearchaeota	Nanoarchaeia	DPANN	20	0	0	12.5	0	0	0	0	0	0	0
GCA_021835465.1_ASM2183546v1_genomic	GCA_021835465.1	Nanoarchaeota	Nanoarchaeia	DPANN	0	0	0	0	0	0	0	0	0	0	0
GCA_002502525.1_ASM250252v1_genomic	GCA_002502525.1	Candidatus Parvarchaeota	Nanoarchaeia	DPANN	20	0	0	0	0	0	0	0	0	0	0
GCA_002499185.1_ASM249918v1_genomic	GCA_002499185.1	Candidatus Pacearchaeota	Nanoarchaeia	DPANN	0	33.3	0	0	0	0	0	0	0	0	0
GCA_000192615.1_ASM19261v1_genomic	GCA_000192615.1	Candidatus Parvarchaeota	Nanoarchaeia	DPANN	0	0	0	0	0	0	0	0	0	0	0
GCA_018303265.1_ASM1830326v1_genomic	GCA_018303265.1	Candidatus Woesearchaeota	Nanoarchaeia	DPANN	0	0	0	12.5	0	0	0	0	0	0	0
GCA_021852135.1_ASM2185213v1_genomic	GCA_021852135.1	Nanoarchaeota	Nanoarchaeia	DPANN	0	0	0	0	0	0	0	0	0	0	0
GCA_023228245.1_ASM2322824v1_genomic	GCA_023228245.1	Candidatus Pacearchaeota	Nanoarchaeia	DPANN	0	0	0	0	0	0	0	0	0	0	0
GCA_018303225.1_ASM1830322v1_genomic	GCA_018303225.1	Candidatus Woesearchaeota	Nanoarchaeia	DPANN	100	33.3	0	100	0	0	0	0	0	0	0
GCA_016185905.1_ASM1618590v1_genomic	GCA_016185905.1	Candidatus Woesearchaeota	Nanoarchaeia	DPANN	20	33.3	0	50	0	0	0	0	0	0	0
GCA_016186375.1_ASM1618637v1_genomic	GCA_016186375.1	Candidatus Pacearchaeota	Nanoarchaeia	DPANN	20	33.3	0	0	0	0	0	0	0	0	0
GCA_021804005.1_ASM2180400v1_genomic	GCA_021804005.1	Nanoarchaeota	Nanoarchaeia	DPANN	60	0	0	12.5	0	0	0	0	0	0	0
GCA_017610045.1_ASM1761004v1_genomic	GCA_017610045.1	Candidatus Woesearchaeota	Nanoarchaeia	DPANN	0	33.3	0	37.5	100	0	0	0	0	0	0
GCA_018302805.1_ASM1830280v1_genomic	GCA_018302805.1	Candidatus Woesearchaeota	Nanoarchaeia	DPANN	0	0	0	12.5	0	0	0	0	0	0	0
GCA_016188155.1_ASM1618815v1_genomic	GCA_016188155.1	Candidatus Woesearchaeota	Nanoarchaeia	DPANN	0	33.3	0	37.5	100	0	0	0	0	0	0
GCA_016181895.1_ASM1618189v1_genomic	GCA_016181895.1	Candidatus Pacearchaeota	Nanoarchaeia	DPANN	0	0	0	12.5	0	0	0	0	0	0	0
GCA_020430455.1_ASM2043045v1_genomic	GCA_020430455.1	Nanoarchaeota	Nanoarchaeia	DPANN	40	0	0	12.5	100	0	0	0	0	0	0
GCA_016188105.1_ASM1618810v1_genomic	GCA_016188105.1	Candidatus Woesearchaeota	Nanoarchaeia	DPANN	20	0	0	12.5	0	0	0	0	0	0	100
GCA_016192945.1_ASM1619294v1_genomic	GCA_016192945.1	Candidatus Woesearchaeota	Nanoarchaeia	DPANN	40	66.7	0	25	100	0	0	0	0	0	0
GCA_016185715.1_ASM1618571v1_genomic	GCA_016185715.1	Candidatus Woesearchaeota	Nanoarchaeia	DPANN	0	33.3	0	87.5	0	0	0	0	0	0	0
GCA_018303325.1_ASM1830332v1_genomic	GCA_018303325.1	Candidatus Woesearchaeota	Nanoarchaeia	DPANN	80	66.7	0	12.5	100	0	0	0	0	0	0
GCA_021804015.1_ASM2180401v1_genomic	GCA_021804015.1	Nanoarchaeota	Nanoarchaeia	DPANN	20	0	0	12.5	0	0	0	0	0	0	0
GCA_016180065.1_ASM1618006v1_genomic	GCA_016180065.1	Candidatus Woesearchaeota	Nanoarchaeia	DPANN	0	0	0	25	100	0	0	0	0	0	0
GCA_002505585.1_ASM250558v1_genomic	GCA_002505585.1	Candidatus Woesearchaeota	Nanoarchaeia	DPANN	0	0	0	12.5	0	0	0	0	0	0	0
GCA_017609795.1_ASM1760979v1_genomic	GCA_017609795.1	Candidatus Pacearchaeota	Nanoarchaeia	DPANN	0	0	0	12.5	0	0	0	0	0	0	0
GCA_018302705.1_ASM1830270v1_genomic	GCA_018302705.1	Candidatus Woesearchaeota	Nanoarchaeia	DPANN	0	0	0	0	100	0	0	0	0	0	0
GCA_002503425.1_ASM250342v1_genomic	GCA_002503425.1	Candidatus Woesearchaeota	Nanoarchaeia	DPANN	20	33.3	0	12.5	0	0	0	0	0	0	0
GCA_016188895.1_ASM1618889v1_genomic	GCA_016188895.1	Candidatus Pacearchaeota	Nanoarchaeia	DPANN	0	0	0	12.5	100	100	0	0	0	0	0
GCA_001786425.1_ASM178642v1_genomic	GCA_001786425.1	Candidatus Pacearchaeota	Nanoarchaeia	DPANN	20	0	0	0	0	0	0	0	0	0	0
GCA_002794155.1_ASM279415v1_genomic	GCA_002794155.1	Candidatus Pacearchaeota	Nanoarchaeia	DPANN	0	0	0	0	100	0	0	0	0	0	0
GCA_013331825.1_ASM1333182v1_genomic	GCA_013331825.1	Candidatus Woesearchaeota	Nanoarchaeia	DPANN	0	0	0	12.5	0	0	0	0	100	0	0
GCA_013330555.1_ASM1333055v1_genomic	GCA_013330555.1	Nanoarchaeota	Nanoarchaeia	DPANN	0	33.3	0	0	0	0	0	0	0	0	0
GCA_002506165.1_ASM250616v1_genomic	GCA_002506165.1	Candidatus Woesearchaeota	Nanoarchaeia	DPANN	0	0	0	25	0	0	0	0	0	0	0
GCA_018304025.1_ASM1830402v1_genomic	GCA_018304025.1	Candidatus Pacearchaeota	Nanoarchaeia	DPANN	0	33.3	0	0	0	0	0	0	0	0	0
GCA_021809675.1_ASM2180967v1_genomic	GCA_021809675.1	Nanoarchaeota	Nanoarchaeia	DPANN	0	0	0	0	0	0	0	0	0	0	0
GCA_016180165.1_ASM1618016v1_genomic	GCA_016180165.1	Candidatus Woesearchaeota	Nanoarchaeia	DPANN	60	16.7	0	100	0	0	0	0	0	0	0
GCA_002762745.1_ASM276274v1_genomic	GCA_002762745.1	Candidatus Woesearchaeota	Nanoarchaeia	DPANN	0	0	0	12.5	0	0	0	0	0	0	0
GCA_023267795.1_ASM2326779v1_genomic	GCA_023267795.1	Candidatus Woesearchaeota	Nanoarchaeia	DPANN	20	33.3	0	12.5	0	0	0	0	0	0	0
GCA_023267565.1_ASM2326756v1_genomic	GCA_023267565.1	Candidatus Woesearchaeota	Nanoarchaeia	DPANN	60	50	0	25	0	0	0	0	0	0	0
GCA_017609655.1_ASM1760965v1_genomic	GCA_017609655.1	Candidatus Woesearchaeota	Nanoarchaeia	DPANN	0	0	0	25	100	0	0	0	0	0	0
GCA_012960605.1_ASM1296060v1_genomic	GCA_012960605.1	Candidatus Pacearchaeota	Nanoarchaeia	DPANN	0	0	0	12.5	0	0	0	0	0	0	0
GCA_017608605.1_ASM1760860v1_genomic	GCA_017608605.1	Candidatus Pacearchaeota	Nanoarchaeia	DPANN	0	0	0	0	0	0	0	0	0	0	0
GCA_017609165.1_ASM1760916v1_genomic	GCA_017609165.1	Candidatus Woesearchaeota	Nanoarchaeia	DPANN	0	0	0	12.5	100	0	0	0	0	0	0
GCA_018302465.1_ASM1830246v1_genomic	GCA_018302465.1	Candidatus Woesearchaeota	Nanoarchaeia	DPANN	0	0	0	12.5	0	0	0	0	0	0	0
GCA_013331515.1_ASM1333151v1_genomic	GCA_013331515.1	Candidatus Woesearchaeota	Nanoarchaeia	DPANN	0	0	0	25	100	0	0	0	0	0	0
GCA_022568055.1_ASM2256805v1_genomic	GCA_022568055.1	Nanoarchaeota	Nanoarchaeia	DPANN	40	33.3	0	87.5	100	100	0	0	0	0	0
GCA_018644825.1_ASM1864482v1_genomic	GCA_018644825.1	Candidatus Woesearchaeota	Nanoarchaeia	DPANN	20	0	0	0	100	0	0	0	0	0	0
GCA_023261805.1_ASM2326180v1_genomic	GCA_023261805.1	Candidatus Parvarchaeota	Nanoarchaeia	DPANN	0	0	0	12.5	0	0	0	0	0	0	0
GCA_013331675.1_ASM1333167v1_genomic	GCA_013331675.1	Candidatus Woesearchaeota	Nanoarchaeia	DPANN	80	66.7	0	12.5	100	0	0	0	0	33.3	0
GCA_009992385.1_ASM999238v1_genomic	GCA_009992385.1	Candidatus Pacearchaeota	Nanoarchaeia	DPANN	0	0	0	0	100	0	0	0	0	0	0
GCA_018303925.1_ASM1830392v1_genomic	GCA_018303925.1	Candidatus Pacearchaeota	Nanoarchaeia	DPANN	0	0	0	12.5	0	0	0	0	0	0	0
GCA_013330465.1_ASM1333046v1_genomic	GCA_013330465.1	Candidatus Woesearchaeota	Nanoarchaeia	DPANN	40	33.3	0	12.5	100	0	0	0	0	0	0
GCA_016185865.1_ASM1618586v1_genomic	GCA_016185865.1	Candidatus Woesearchaeota	Nanoarchaeia	DPANN	40	0	0	12.5	0	0	0	0	0	0	0
GCA_017609005.1_ASM1760900v1_genomic	GCA_017609005.1	Candidatus Woesearchaeota	Nanoarchaeia	DPANN	20	33.3	0	12.5	100	0	0	0	0	0	0
GCA_018302335.1_ASM1830233v1_genomic	GCA_018302335.1	Candidatus Woesearchaeota	Nanoarchaeia	DPANN	60	33.3	0	0	0	0	0	0	0	0	0
GCA_018304175.1_ASM1830417v1_genomic	GCA_018304175.1	Candidatus Pacearchaeota	Nanoarchaeia	DPANN	0	0	0	0	0	0	0	0	0	0	0
GCA_023898345.1_ASM2389834v1_genomic	GCA_023898345.1	Candidatus Woesearchaeota	Nanoarchaeia	DPANN	0	0	0	12.5	100	0	0	0	0	0	0
GCA_021797085.1_ASM2179708v1_genomic	GCA_021797085.1	Nanoarchaeota	Nanoarchaeia	DPANN	20	0	0	0	0	0	0	0	0	0	0
GCA_013329215.1_ASM1332921v1_genomic	GCA_013329215.1	Nanoarchaeota	Nanoarchaeia	DPANN	40	33.3	0	12.5	0	0	0	0	0	0	0
GCA_018648165.1_ASM1864816v1_genomic	GCA_018648165.1	Candidatus Woesearchaeota	Nanoarchaeia	DPANN	20	16.7	0	75	0	100	0	0	100	0	0
GCA_018303745.1_ASM1830374v1_genomic	GCA_018303745.1	Candidatus Pacearchaeota	Nanoarchaeia	DPANN	0	16.7	0	25	0	0	0	0	0	0	0
GCA_023267355.1_ASM2326735v1_genomic	GCA_023267355.1	Candidatus Woesearchaeota	Nanoarchaeia	DPANN	40	0	0	12.5	0	0	0	0	0	0	0
GCA_017608525.1_ASM1760852v1_genomic	GCA_017608525.1	Candidatus Woesearchaeota	Nanoarchaeia	DPANN	0	0	0	0	0	0	0	0	50	0	0
GCA_023474575.1_ASM2347457v1_genomic	GCA_023474575.1	Candidatus Parvarchaeota	Nanoarchaeia	DPANN	0	0	0	0	0	0	0	0	0	0	0
GCA_021791655.1_ASM2179165v1_genomic	GCA_021791655.1	Nanoarchaeota	Nanoarchaeia	DPANN	40	33.3	0	12.5	100	0	0	0	0	0	0
GCA_016188175.1_ASM1618817v1_genomic	GCA_016188175.1	Candidatus Woesearchaeota	Nanoarchaeia	DPANN	40	33.3	0	62.5	0	0	0	0	0	0	0
GCA_021834755.1_ASM2183475v1_genomic	GCA_021834755.1	Nanoarchaeota	Nanoarchaeia	DPANN	0	0	0	0	0	0	0	0	0	0	0
GCA_002779235.1_ASM277923v1_genomic	GCA_002779235.1	Candidatus Woesearchaeota	Nanoarchaeia	DPANN	0	0	0	12.5	0	0	0	0	0	0	0
GCA_002762835.1_ASM276283v1_genomic	GCA_002762835.1	Candidatus Woesearchaeota	Nanoarchaeia	DPANN	0	0	0	0	0	0	0	0	0	0	0
GCA_016214025.1_ASM1621402v1_genomic	GCA_016214025.1	Candidatus Woesearchaeota	Nanoarchaeia	DPANN	0	0	0	25	0	0	0	0	0	0	0
GCA_021825165.1_ASM2182516v1_genomic	GCA_021825165.1	Nanoarchaeota	Nanoarchaeia	DPANN	0	0	0	12.5	0	0	0	0	0	0	0
GCA_018303755.1_ASM1830375v1_genomic	GCA_018303755.1	Candidatus Pacearchaeota	Nanoarchaeia	DPANN	0	0	0	0	0	0	0	0	0	0	0
GCA_016179955.1_ASM1617995v1_genomic	GCA_016179955.1	Candidatus Woesearchaeota	Nanoarchaeia	DPANN	60	0	0	25	0	0	0	0	0	0	0
GCA_018303485.1_ASM1830348v1_genomic	GCA_018303485.1	Candidatus Woesearchaeota	Nanoarchaeia	DPANN	0	0	0	12.5	0	0	0	0	0	0	0
GCA_017609695.1_ASM1760969v1_genomic	GCA_017609695.1	Candidatus Pacearchaeota	Nanoarchaeia	DPANN	0	0	0	0	0	0	0	0	0	0	0
GCA_002498685.1_ASM249868v1_genomic	GCA_002498685.1	Candidatus Parvarchaeota	Nanoarchaeia	DPANN	20	0	0	0	0	0	0	0	0	0	0
GCA_016192985.1_ASM1619298v1_genomic	GCA_016192985.1	Candidatus Woesearchaeota	Nanoarchaeia	DPANN	40	16.7	0	25	0	0	0	0	0	0	0
GCA_017609465.1_ASM1760946v1_genomic	GCA_017609465.1	Candidatus Woesearchaeota	Nanoarchaeia	DPANN	0	0	0	0	0	0	0	0	0	0	0
GCA_018303105.1_ASM1830310v1_genomic	GCA_018303105.1	Candidatus Woesearchaeota	Nanoarchaeia	DPANN	20	0	0	12.5	0	0	0	0	0	0	0
GCA_018304085.1_ASM1830408v1_genomic	GCA_018304085.1	Candidatus Pacearchaeota	Nanoarchaeia	DPANN	0	0	0	0	0	0	0	0	0	0	0
GCA_013335235.1_ASM1333523v1_genomic	GCA_013335235.1	Nanoarchaeota	Nanoarchaeia	DPANN	80	50	0	12.5	100	0	0	0	0	0	0
GCA_018302185.1_ASM1830218v1_genomic	GCA_018302185.1	Candidatus Woesearchaeota	Nanoarchaeia	DPANN	40	33.3	0	12.5	0	0	0	0	0	0	0
GCA_016185915.1_ASM1618591v1_genomic	GCA_016185915.1	Candidatus Woesearchaeota	Nanoarchaeia	DPANN	40	33.3	0	37.5	0	0	0	0	0	0	0
GCA_022564635.1_ASM2256463v1_genomic	GCA_022564635.1	Nanoarchaeota	Nanoarchaeia	DPANN	40	33.3	0	100	0	0	0	0	0	0	0
GCA_017608065.1_ASM1760806v1_genomic	GCA_017608065.1	Candidatus Pacearchaeota	Nanoarchaeia	DPANN	0	0	0	12.5	0	0	0	0	0	0	0
GCA_018303165.1_ASM1830316v1_genomic	GCA_018303165.1	Candidatus Woesearchaeota	Nanoarchaeia	DPANN	40	16.7	0	12.5	100	0	0	0	0	0	0
GCA_017609845.1_ASM1760984v1_genomic	GCA_017609845.1	Candidatus Woesearchaeota	Nanoarchaeia	DPANN	0	0	0	0	100	0	0	0	0	0	0
GCA_021829785.1_ASM2182978v1_genomic	GCA_021829785.1	Nanoarchaeota	Nanoarchaeia	DPANN	20	0	0	0	0	0	0	0	0	0	0
GCA_023475035.1_ASM2347503v1_genomic	GCA_023475035.1	Candidatus Pacearchaeota	Nanoarchaeia	DPANN	20	33.3	0	0	0	0	0	0	0	0	0
GCA_021807125.1_ASM2180712v1_genomic	GCA_021807125.1	Nanoarchaeota	Nanoarchaeia	DPANN	60	0	0	0	0	0	0	0	0	0	0
GCA_018303565.1_ASM1830356v1_genomic	GCA_018303565.1	Candidatus Woesearchaeota	Nanoarchaeia	DPANN	40	33.3	0	100	0	0	0	0	0	0	0
GCA_013329155.1_ASM1332915v1_genomic	GCA_013329155.1	Candidatus Woesearchaeota	Nanoarchaeia	DPANN	0	0	0	12.5	0	0	0	0	100	0	0
GCA_002505845.1_ASM250584v1_genomic	GCA_002505845.1	Candidatus Woesearchaeota	Nanoarchaeia	DPANN	0	0	0	12.5	100	0	0	0	0	0	0
GCA_017609755.1_ASM1760975v1_genomic	GCA_017609755.1	Candidatus Pacearchaeota	Nanoarchaeia	DPANN	0	0	0	0	0	0	0	0	0	0	0
GCA_023261565.1_ASM2326156v1_genomic	GCA_023261565.1	Candidatus Woesearchaeota	Nanoarchaeia	DPANN	0	0	0	0	0	0	0	0	0	0	0
GCA_018304225.1_ASM1830422v1_genomic	GCA_018304225.1	Candidatus Pacearchaeota	Nanoarchaeia	DPANN	20	0	0	12.5	0	0	0	0	0	0	0
GCA_017608305.1_ASM1760830v1_genomic	GCA_017608305.1	Candidatus Pacearchaeota	Nanoarchaeia	DPANN	0	0	0	0	0	0	0	0	0	0	0
GCA_016180195.1_ASM1618019v1_genomic	GCA_016180195.1	Candidatus Woesearchaeota	Nanoarchaeia	DPANN	60	66.7	0	25	0	0	0	0	0	0	0
GCA_002498125.1_ASM249812v1_genomic	GCA_002498125.1	Candidatus Woesearchaeota	Nanoarchaeia	DPANN	0	0	0	12.5	0	0	0	0	0	0	0
GCA_016185745.1_ASM1618574v1_genomic	GCA_016185745.1	Candidatus Woesearchaeota	Nanoarchaeia	DPANN	20	0	0	12.5	0	0	0	0	0	0	0
GCA_017608285.1_ASM1760828v1_genomic	GCA_017608285.1	Candidatus Woesearchaeota	Nanoarchaeia	DPANN	40	50	0	12.5	100	0	0	0	0	0	0
GCA_002792075.1_ASM279207v1_genomic	GCA_002792075.1	Candidatus Woesearchaeota	Nanoarchaeia	DPANN	20	33.3	0	12.5	0	0	0	0	0	0	0
GCA_016208715.1_ASM1620871v1_genomic	GCA_016208715.1	Candidatus Woesearchaeota	Nanoarchaeia	DPANN	20	16.7	0	0	0	0	0	0	50	0	0
GCA_018304055.1_ASM1830405v1_genomic	GCA_018304055.1	Candidatus Pacearchaeota	Nanoarchaeia	DPANN	20	33.3	0	12.5	0	0	0	0	0	0	0
GCA_021845405.1_ASM2184540v1_genomic	GCA_021845405.1	Nanoarchaeota	Nanoarchaeia	DPANN	20	0	0	0	0	0	0	0	0	0	0
GCA_002792635.1_ASM279263v1_genomic	GCA_002792635.1	Candidatus Pacearchaeota	Nanoarchaeia	DPANN	0	0	0	0	100	0	0	0	0	0	0
GCA_023269185.1_ASM2326918v1_genomic	GCA_023269185.1	Candidatus Woesearchaeota	Nanoarchaeia	DPANN	20	0	0	12.5	0	0	0	0	0	0	0
GCA_002784405.1_ASM278440v1_genomic	GCA_002784405.1	Candidatus Woesearchaeota	Nanoarchaeia	DPANN	0	0	0	0	0	0	0	0	0	0	0
GCA_023269295.1_ASM2326929v1_genomic	GCA_023269295.1	Candidatus Woesearchaeota	Nanoarchaeia	DPANN	0	33.3	0	25	100	0	0	0	0	0	0
GCA_018648745.1_ASM1864874v1_genomic	GCA_018648745.1	Candidatus Woesearchaeota	Nanoarchaeia	DPANN	0	0	0	12.5	0	0	100	0	0	0	0
GCA_002497285.1_ASM249728v1_genomic	GCA_002497285.1	Candidatus Pacearchaeota	Nanoarchaeia	DPANN	0	33.3	0	0	100	0	0	0	0	0	0
GCA_023485775.1_ASM2348577v1_genomic	GCA_023485775.1	Candidatus Parvarchaeota	Nanoarchaeia	DPANN	20	0	0	0	0	0	0	0	0	0	0
GCA_017609245.1_ASM1760924v1_genomic	GCA_017609245.1	Candidatus Woesearchaeota	Nanoarchaeia	DPANN	0	0	0	0	0	0	0	0	0	0	0
GCA_002496015.1_ASM249601v1_genomic	GCA_002496015.1	Candidatus Pacearchaeota	Nanoarchaeia	DPANN	20	33.3	0	12.5	0	0	0	0	0	0	0
GCA_018303895.1_ASM1830389v1_genomic	GCA_018303895.1	Candidatus Pacearchaeota	Nanoarchaeia	DPANN	0	0	0	0	0	0	0	0	0	0	0
GCA_013331045.1_ASM1333104v1_genomic	GCA_013331045.1	Candidatus Woesearchaeota	Nanoarchaeia	DPANN	60	33.3	0	75	100	0	0	0	0	0	0
GCA_023473925.1_ASM2347392v1_genomic	GCA_023473925.1	Candidatus Parvarchaeota	Nanoarchaeia	DPANN	20	33.3	0	0	0	0	0	0	0	0	0
GCA_023380555.1_ASM2338055v1_genomic	GCA_023380555.1	Candidatus Parvarchaeota	Nanoarchaeia	DPANN	60	0	0	12.5	0	0	0	0	0	0	0
GCA_023255615.1_ASM2325561v1_genomic	GCA_023255615.1	Candidatus Woesearchaeota	Nanoarchaeia	DPANN	40	33.3	0	87.5	0	100	0	0	0	0	0
GCA_016180565.1_ASM1618056v1_genomic	GCA_016180565.1	Candidatus Pacearchaeota	Nanoarchaeia	DPANN	0	0	0	0	0	0	0	0	0	0	0
GCA_018304395.1_ASM1830439v1_genomic	GCA_018304395.1	unclassified DPANN group	Nanoarchaeia	DPANN	0	0	0	0	0	0	0	0	0	0	0
GCA_017608185.1_ASM1760818v1_genomic	GCA_017608185.1	Candidatus Pacearchaeota	Nanoarchaeia	DPANN	60	33.3	0	37.5	0	0	0	0	0	0	0
GCA_002792675.1_ASM279267v1_genomic	GCA_002792675.1	Candidatus Pacearchaeota	Nanoarchaeia	DPANN	0	0	0	0	100	0	0	0	0	0	0
GCA_016180105.1_ASM1618010v1_genomic	GCA_016180105.1	Candidatus Woesearchaeota	Nanoarchaeia	DPANN	0	0	0	25	0	0	0	0	0	0	0
GCA_002763025.1_ASM276302v1_genomic	GCA_002763025.1	Candidatus Woesearchaeota	Nanoarchaeia	DPANN	20	0	0	12.5	0	0	0	0	0	0	0
GCA_021800365.1_ASM2180036v1_genomic	GCA_021800365.1	Nanoarchaeota	Nanoarchaeia	DPANN	60	33.3	0	12.5	0	0	0	0	0	0	0
GCA_013331615.1_ASM1333161v1_genomic	GCA_013331615.1	Candidatus Woesearchaeota	Nanoarchaeia	DPANN	60	0	0	50	0	0	0	0	0	33.3	0
GCA_001872125.1_ASM187212v1_genomic	GCA_001872125.1	Candidatus Pacearchaeota	Nanoarchaeia	DPANN	0	0	0	0	100	0	0	0	0	0	0
GCA_023264635.1_ASM2326463v1_genomic	GCA_023264635.1	Candidatus Woesearchaeota	Nanoarchaeia	DPANN	20	33.3	0	12.5	0	0	0	0	0	0	0
GCA_016181245.1_ASM1618124v1_genomic	GCA_016181245.1	Candidatus Woesearchaeota	Nanoarchaeia	DPANN	0	0	0	25	0	0	0	0	0	0	0
GCA_018304205.1_ASM1830420v1_genomic	GCA_018304205.1	Candidatus Pacearchaeota	Nanoarchaeia	DPANN	0	0	0	12.5	0	100	0	0	0	0	0
GCA_023380585.1_ASM2338058v1_genomic	GCA_023380585.1	Candidatus Parvarchaeota	Nanoarchaeia	DPANN	20	33.3	0	0	0	0	0	0	0	0	0
GCA_017608915.1_ASM1760891v1_genomic	GCA_017608915.1	Candidatus Pacearchaeota	Nanoarchaeia	DPANN	0	0	0	0	0	0	0	0	0	0	0
GCA_018303515.1_ASM1830351v1_genomic	GCA_018303515.1	Candidatus Woesearchaeota	Nanoarchaeia	DPANN	0	33.3	0	25	0	0	0	0	0	0	0
GCA_018304045.1_ASM1830404v1_genomic	GCA_018304045.1	Candidatus Pacearchaeota	Nanoarchaeia	DPANN	0	33.3	0	12.5	0	0	0	0	0	0	0
GCA_017608745.1_ASM1760874v1_genomic	GCA_017608745.1	Candidatus Parvarchaeota	Nanoarchaeia	DPANN	40	0	0	0	0	0	0	0	0	0	0
GCA_015122065.1_ASM1512206v1_genomic	GCA_015122065.1	Candidatus Parvarchaeota	Nanoarchaeia	DPANN	0	0	0	0	0	0	0	0	0	0	0
GCA_002762795.1_ASM276279v1_genomic	GCA_002762795.1	Candidatus Woesearchaeota	Nanoarchaeia	DPANN	20	0	0	12.5	0	0	0	0	0	0	0
GCA_002789435.1_ASM278943v1_genomic	GCA_002789435.1	Candidatus Pacearchaeota	Nanoarchaeia	DPANN	0	0	0	0	100	0	0	0	0	0	0
GCA_016185555.1_ASM1618555v1_genomic	GCA_016185555.1	Candidatus Woesearchaeota	Nanoarchaeia	DPANN	20	0	0	0	0	0	0	100	0	33.3	0
GCA_022709085.1_ASM2270908v1_genomic	GCA_022709085.1	Nanoarchaeota	Nanoarchaeia	DPANN	0	16.7	0	0	0	0	0	0	0	0	0
GCA_017608505.1_ASM1760850v1_genomic	GCA_017608505.1	Candidatus Parvarchaeota	Nanoarchaeia	DPANN	40	0	0	12.5	0	0	0	0	0	0	0
GCA_017609265.1_ASM1760926v1_genomic	GCA_017609265.1	Candidatus Woesearchaeota	Nanoarchaeia	DPANN	20	0	0	0	0	0	0	0	0	0	0
GCA_002412085.1_ASM241208v1_genomic	GCA_002412085.1	Candidatus Parvarchaeota	Nanoarchaeia	DPANN	0	0	0	0	0	0	0	0	0	0	0
GCA_017608465.1_ASM1760846v1_genomic	GCA_017608465.1	Candidatus Parvarchaeota	Nanoarchaeia	DPANN	0	0	0	0	0	0	0	0	0	0	0
GCA_002792655.1_ASM279265v1_genomic	GCA_002792655.1	Candidatus Pacearchaeota	Nanoarchaeia	DPANN	0	0	0	0	0	0	0	0	0	0	0
GCA_016180125.1_ASM1618012v1_genomic	GCA_016180125.1	Candidatus Woesearchaeota	Nanoarchaeia	DPANN	0	0	0	12.5	0	0	0	0	0	0	0
GCA_021836125.1_ASM2183612v1_genomic	GCA_021836125.1	Nanoarchaeota	Nanoarchaeia	DPANN	60	33.3	0	0	0	0	0	0	0	0	0
GCA_001872315.1_ASM187231v1_genomic	GCA_001872315.1	Candidatus Pacearchaeota	Nanoarchaeia	DPANN	0	33.3	0	0	100	0	0	0	0	0	0
GCA_016432305.1_ASM1643230v1_genomic	GCA_016432305.1	Candidatus Woesearchaeota	Nanoarchaeia	DPANN	0	0	0	12.5	0	0	0	0	0	0	0
GCA_016180285.1_ASM1618028v1_genomic	GCA_016180285.1	Candidatus Woesearchaeota	Nanoarchaeia	DPANN	40	0	0	0	100	0	0	0	0	0	0
GCA_013328975.1_ASM1332897v1_genomic	GCA_013328975.1	Candidatus Woesearchaeota	Nanoarchaeia	DPANN	0	0	0	12.5	100	0	0	0	100	0	0
GCA_002788575.1_ASM278857v1_genomic	GCA_002788575.1	Candidatus Pacearchaeota	Nanoarchaeia	DPANN	0	0	0	0	0	0	0	0	0	0	0
GCA_018303375.1_ASM1830337v1_genomic	GCA_018303375.1	Candidatus Woesearchaeota	Nanoarchaeia	DPANN	20	0	0	12.5	0	0	0	0	0	0	0
GCA_018304345.1_ASM1830434v1_genomic	GCA_018304345.1	unclassified DPANN group	Nanoarchaeia	DPANN	0	0	0	0	0	0	0	0	0	0	0
GCA_013331935.1_ASM1333193v1_genomic	GCA_013331935.1	Nanoarchaeota	Nanoarchaeia	DPANN	0	0	0	0	0	0	0	0	0	0	0
GCA_018302915.1_ASM1830291v1_genomic	GCA_018302915.1	Candidatus Woesearchaeota	Nanoarchaeia	DPANN	0	0	0	0	0	100	0	0	100	0	0
GCA_001872185.1_ASM187218v1_genomic	GCA_001872185.1	Candidatus Pacearchaeota	Nanoarchaeia	DPANN	0	0	0	12.5	0	0	0	0	0	0	0
GCA_017608985.1_ASM1760898v1_genomic	GCA_017608985.1	Candidatus Pacearchaeota	Nanoarchaeia	DPANN	0	0	0	0	0	0	0	0	0	0	0
GCA_013331745.1_ASM1333174v1_genomic	GCA_013331745.1	Candidatus Woesearchaeota	Nanoarchaeia	DPANN	40	16.7	0	12.5	100	0	0	0	0	0	0
GCA_018302265.1_ASM1830226v1_genomic	GCA_018302265.1	Candidatus Woesearchaeota	Nanoarchaeia	DPANN	0	0	0	0	0	0	0	0	0	0	0
GCA_021818665.1_ASM2181866v1_genomic	GCA_021818665.1	Nanoarchaeota	Nanoarchaeia	DPANN	60	33.3	0	25	0	0	0	0	0	0	0
GCA_016181375.1_ASM1618137v1_genomic	GCA_016181375.1	Candidatus Woesearchaeota	Nanoarchaeia	DPANN	0	16.7	0	12.5	0	0	0	0	0	0	0
GCA_016188215.1_ASM1618821v1_genomic	GCA_016188215.1	Candidatus Woesearchaeota	Nanoarchaeia	DPANN	0	0	0	12.5	100	0	0	0	0	0	0
GCA_013331575.1_ASM1333157v1_genomic	GCA_013331575.1	Candidatus Woesearchaeota	Nanoarchaeia	DPANN	0	33.3	0	12.5	0	0	0	0	0	0	0
GCA_016180135.1_ASM1618013v1_genomic	GCA_016180135.1	Candidatus Woesearchaeota	Nanoarchaeia	DPANN	60	33.3	0	100	0	0	0	0	0	0	0
GCA_016185955.1_ASM1618595v1_genomic	GCA_016185955.1	Candidatus Woesearchaeota	Nanoarchaeia	DPANN	20	33.3	0	100	0	0	0	0	0	0	0
GCA_013331835.1_ASM1333183v1_genomic	GCA_013331835.1	Nanoarchaeota	Nanoarchaeia	DPANN	20	33.3	0	0	100	0	0	0	0	0	0
GCA_023474395.1_ASM2347439v1_genomic	GCA_023474395.1	Candidatus Parvarchaeota	Nanoarchaeia	DPANN	0	0	0	0	0	0	0	0	0	0	0
GCA_002762695.1_ASM276269v1_genomic	GCA_002762695.1	Candidatus Woesearchaeota	Nanoarchaeia	DPANN	20	33.3	0	12.5	0	0	0	0	0	0	0
GCA_018303885.1_ASM1830388v1_genomic	GCA_018303885.1	Candidatus Pacearchaeota	Nanoarchaeia	DPANN	20	0	0	0	0	0	0	0	0	0	0
GCA_002499655.1_ASM249965v1_genomic	GCA_002499655.1	Candidatus Parvarchaeota	Nanoarchaeia	DPANN	20	0	0	0	0	0	0	0	0	0	0
GCA_002505115.1_ASM250511v1_genomic	GCA_002505115.1	Candidatus Parvarchaeota	Nanoarchaeia	DPANN	20	0	0	0	0	0	0	0	0	0	0
GCA_018302745.1_ASM1830274v1_genomic	GCA_018302745.1	Candidatus Woesearchaeota	Nanoarchaeia	DPANN	0	0	0	25	100	0	0	0	50	0	0
GCA_018303205.1_ASM1830320v1_genomic	GCA_018303205.1	Candidatus Woesearchaeota	Nanoarchaeia	DPANN	60	33.3	0	25	100	0	0	0	0	0	0
GCA_021846785.1_ASM2184678v1_genomic	GCA_021846785.1	Nanoarchaeota	Nanoarchaeia	DPANN	20	0	0	0	0	0	0	0	0	0	0
GCA_017609085.1_ASM1760908v1_genomic	GCA_017609085.1	Candidatus Pacearchaeota	Nanoarchaeia	DPANN	0	33.3	0	0	100	0	0	0	0	0	0
GCA_018302785.1_ASM1830278v1_genomic	GCA_018302785.1	Candidatus Woesearchaeota	Nanoarchaeia	DPANN	20	0	0	25	0	0	0	0	0	33.3	0
GCA_017609525.1_ASM1760952v1_genomic	GCA_017609525.1	Candidatus Woesearchaeota	Nanoarchaeia	DPANN	0	0	0	62.5	100	0	0	0	0	0	0
GCA_018303465.1_ASM1830346v1_genomic	GCA_018303465.1	Candidatus Woesearchaeota	Nanoarchaeia	DPANN	0	0	0	0	0	0	0	0	0	0	0
GCA_018303505.1_ASM1830350v1_genomic	GCA_018303505.1	Candidatus Woesearchaeota	Nanoarchaeia	DPANN	40	33.3	0	100	0	0	0	0	50	0	0
GCA_023259315.1_ASM2325931v1_genomic	GCA_023259315.1	Candidatus Woesearchaeota	Nanoarchaeia	DPANN	0	33.3	0	37.5	0	0	0	100	0	33.3	0
GCA_023269955.1_ASM2326995v1_genomic	GCA_023269955.1	Candidatus Parvarchaeota	Nanoarchaeia	DPANN	20	0	0	12.5	0	0	0	0	0	0	0
GCA_021826865.1_ASM2182686v1_genomic	GCA_021826865.1	Nanoarchaeota	Nanoarchaeia	DPANN	0	0	0	0	100	0	0	0	0	0	0
GCA_021802005.1_ASM2180200v1_genomic	GCA_021802005.1	Nanoarchaeota	Nanoarchaeia	DPANN	20	0	0	0	0	0	0	0	0	0	0
GCA_018302685.1_ASM1830268v1_genomic	GCA_018302685.1	Candidatus Woesearchaeota	Nanoarchaeia	DPANN	20	16.7	0	0	100	0	0	0	0	0	0
GCA_002780285.1_ASM278028v1_genomic	GCA_002780285.1	Candidatus Pacearchaeota	Nanoarchaeia	DPANN	0	0	0	0	0	0	0	0	0	0	0
GCA_013331775.1_ASM1333177v1_genomic	GCA_013331775.1	Nanoarchaeota	Nanoarchaeia	DPANN	0	0	0	12.5	100	0	0	0	0	0	0
GCA_018304165.1_ASM1830416v1_genomic	GCA_018304165.1	Candidatus Pacearchaeota	Nanoarchaeia	DPANN	20	0	0	12.5	0	0	0	0	0	0	0
GCA_016180265.1_ASM1618026v1_genomic	GCA_016180265.1	Candidatus Woesearchaeota	Nanoarchaeia	DPANN	20	0	0	12.5	0	0	0	0	0	0	0
GCA_017609505.1_ASM1760950v1_genomic	GCA_017609505.1	Candidatus Pacearchaeota	Nanoarchaeia	DPANN	0	0	0	0	0	0	0	0	0	0	0
GCA_023380435.1_ASM2338043v1_genomic	GCA_023380435.1	Candidatus Parvarchaeota	Nanoarchaeia	DPANN	0	0	0	0	0	0	0	0	0	0	0
GCA_016180275.1_ASM1618027v1_genomic	GCA_016180275.1	Candidatus Woesearchaeota	Nanoarchaeia	DPANN	60	0	0	12.5	0	0	0	0	0	33.3	0
GCA_018302605.1_ASM1830260v1_genomic	GCA_018302605.1	Candidatus Woesearchaeota	Nanoarchaeia	DPANN	20	0	0	25	0	0	0	0	0	0	0
GCA_002503215.1_ASM250321v1_genomic	GCA_002503215.1	Candidatus Parvarchaeota	Nanoarchaeia	DPANN	20	0	0	0	0	0	0	0	0	0	0
GCA_018302105.1_ASM1830210v1_genomic	GCA_018302105.1	Candidatus Woesearchaeota	Nanoarchaeia	DPANN	0	0	0	12.5	0	0	0	0	0	0	0
GCA_002762735.1_ASM276273v1_genomic	GCA_002762735.1	Candidatus Pacearchaeota	Nanoarchaeia	DPANN	0	0	0	0	100	0	0	0	0	0	0
GCA_018303805.1_ASM1830380v1_genomic	GCA_018303805.1	Candidatus Pacearchaeota	Nanoarchaeia	DPANN	0	0	0	25	0	0	0	0	0	0	0
GCA_013329035.1_ASM1332903v1_genomic	GCA_013329035.1	Nanoarchaeota	Nanoarchaeia	DPANN	0	33.3	0	0	0	0	0	0	0	0	0
GCA_023379145.1_ASM2337914v1_genomic	GCA_023379145.1	Candidatus Parvarchaeota	Nanoarchaeia	DPANN	20	0	0	0	0	0	0	0	0	0	0
GCA_018302085.1_ASM1830208v1_genomic	GCA_018302085.1	Candidatus Woesearchaeota	Nanoarchaeia	DPANN	0	0	0	25	0	0	0	0	0	0	0
GCA_018302305.1_ASM1830230v1_genomic	GCA_018302305.1	Candidatus Woesearchaeota	Nanoarchaeia	DPANN	0	0	0	0	0	0	0	0	0	0	0
GCA_002763165.1_ASM276316v1_genomic	GCA_002763165.1	Candidatus Pacearchaeota	Nanoarchaeia	DPANN	0	0	0	12.5	0	0	0	0	0	0	0
GCA_018302505.1_ASM1830250v1_genomic	GCA_018302505.1	Candidatus Woesearchaeota	Nanoarchaeia	DPANN	0	33.3	0	0	0	0	0	0	0	0	0
GCA_017991485.1_ASM1799148v1_genomic	GCA_017991485.1	Candidatus Pacearchaeota	Nanoarchaeia	DPANN	0	16.7	0	0	0	0	0	0	0	0	0
GCA_020430385.1_ASM2043038v1_genomic	GCA_020430385.1	Nanoarchaeota	Nanoarchaeia	DPANN	0	0	0	12.5	100	0	0	0	0	0	0
GCA_023266475.1_ASM2326647v1_genomic	GCA_023266475.1	Candidatus Woesearchaeota	Nanoarchaeia	DPANN	60	33.3	0	87.5	0	0	0	0	0	0	0
GCA_013330725.1_ASM1333072v1_genomic	GCA_013330725.1	Nanoarchaeota	Nanoarchaeia	DPANN	0	0	0	25	0	0	0	0	50	0	0
GCA_018303545.1_ASM1830354v1_genomic	GCA_018303545.1	Candidatus Woesearchaeota	Nanoarchaeia	DPANN	0	0	0	12.5	0	0	0	0	0	0	0
GCA_023380975.1_ASM2338097v1_genomic	GCA_023380975.1	Candidatus Parvarchaeota	Nanoarchaeia	DPANN	20	0	0	0	0	0	0	0	0	0	0
GCA_018647965.1_ASM1864796v1_genomic	GCA_018647965.1	Candidatus Woesearchaeota	Nanoarchaeia	DPANN	0	0	0	0	0	0	0	0	0	0	0
GCA_016180035.1_ASM1618003v1_genomic	GCA_016180035.1	Candidatus Woesearchaeota	Nanoarchaeia	DPANN	0	33.3	0	0	0	0	0	0	0	0	0
GCA_017608045.1_ASM1760804v1_genomic	GCA_017608045.1	Candidatus Parvarchaeota	Nanoarchaeia	DPANN	0	0	0	0	0	0	0	0	0	0	0
GCA_013330075.1_ASM1333007v1_genomic	GCA_013330075.1	Candidatus Woesearchaeota	Nanoarchaeia	DPANN	0	0	0	12.5	0	0	0	0	0	0	0
GCA_023488405.1_ASM2348840v1_genomic	GCA_023488405.1	Candidatus Parvarchaeota	Nanoarchaeia	DPANN	0	0	0	0	0	0	0	0	0	0	0
GCA_016185625.1_ASM1618562v1_genomic	GCA_016185625.1	Candidatus Woesearchaeota	Nanoarchaeia	DPANN	0	0	0	0	0	0	0	0	0	0	0
GCA_016179945.1_ASM1617994v1_genomic	GCA_016179945.1	Candidatus Woesearchaeota	Nanoarchaeia	DPANN	0	0	0	0	0	0	0	0	0	0	0
GCA_017609825.1_ASM1760982v1_genomic	GCA_017609825.1	Candidatus Pacearchaeota	Nanoarchaeia	DPANN	0	33.3	0	0	100	0	0	0	0	0	0
GCA_016181215.1_ASM1618121v1_genomic	GCA_016181215.1	Candidatus Woesearchaeota	Nanoarchaeia	DPANN	0	0	0	0	0	0	0	0	0	0	0
GCA_009992305.1_ASM999230v1_genomic	GCA_009992305.1	Candidatus Pacearchaeota	Nanoarchaeia	DPANN	0	33.3	0	0	100	0	0	0	0	0	0
GCA_001786395.1_ASM178639v1_genomic	GCA_001786395.1	Candidatus Pacearchaeota	Nanoarchaeia	DPANN	0	33.3	0	25	100	0	0	0	0	0	0
GCA_013331915.1_ASM1333191v1_genomic	GCA_013331915.1	Candidatus Woesearchaeota	Nanoarchaeia	DPANN	40	33.3	0	100	100	0	0	0	0	0	0
GCA_014239585.1_ASM1423958v1_genomic	GCA_014239585.1	Nanoarchaeota	Nanoarchaeia	DPANN	20	0	0	0	0	0	0	0	0	0	0
GCA_002503705.1_ASM250370v1_genomic	GCA_002503705.1	Candidatus Woesearchaeota	Nanoarchaeia	DPANN	0	0	0	0	0	0	0	0	0	0	0
GCA_014240435.1_ASM1424043v1_genomic	GCA_014240435.1	Nanoarchaeota	Nanoarchaeia	DPANN	0	33.3	0	12.5	0	0	0	0	0	0	0
GCA_018302165.1_ASM1830216v1_genomic	GCA_018302165.1	Candidatus Woesearchaeota	Nanoarchaeia	DPANN	20	0	0	0	0	0	0	0	0	0	0
GCA_023245115.1_ASM2324511v1_genomic	GCA_023245115.1	Candidatus Woesearchaeota	Nanoarchaeia	DPANN	0	0	0	12.5	0	0	0	0	0	0	0
GCA_018303655.1_ASM1830365v1_genomic	GCA_018303655.1	Candidatus Woesearchaeota	Nanoarchaeia	DPANN	0	33.3	0	100	0	0	0	0	50	0	0
GCA_018302235.1_ASM1830223v1_genomic	GCA_018302235.1	Candidatus Woesearchaeota	Nanoarchaeia	DPANN	0	16.7	0	0	0	0	0	0	0	0	0
GCA_016188065.1_ASM1618806v1_genomic	GCA_016188065.1	Candidatus Woesearchaeota	Nanoarchaeia	DPANN	0	16.7	0	12.5	0	0	0	0	0	0	0
GCA_017608945.1_ASM1760894v1_genomic	GCA_017608945.1	Candidatus Pacearchaeota	Nanoarchaeia	DPANN	0	0	0	12.5	0	0	0	0	0	0	0
GCA_018303575.1_ASM1830357v1_genomic	GCA_018303575.1	Candidatus Woesearchaeota	Nanoarchaeia	DPANN	40	33.3	0	100	0	0	0	0	0	0	0
GCA_002763105.1_ASM276310v1_genomic	GCA_002763105.1	Candidatus Pacearchaeota	Nanoarchaeia	DPANN	0	0	0	12.5	0	0	0	0	0	0	0
GCA_016180025.1_ASM1618002v1_genomic	GCA_016180025.1	Candidatus Woesearchaeota	Nanoarchaeia	DPANN	0	0	0	25	100	0	0	0	0	0	0
GCA_016180225.1_ASM1618022v1_genomic	GCA_016180225.1	Candidatus Woesearchaeota	Nanoarchaeia	DPANN	20	0	0	25	0	0	0	0	0	0	0
GCA_017610145.1_ASM1761014v1_genomic	GCA_017610145.1	Candidatus Woesearchaeota	Nanoarchaeia	DPANN	0	0	0	12.5	0	0	0	0	0	0	0
GCA_002762915.1_ASM276291v1_genomic	GCA_002762915.1	Candidatus Woesearchaeota	Nanoarchaeia	DPANN	0	0	0	12.5	0	0	0	0	0	0	0
GCA_018303285.1_ASM1830328v1_genomic	GCA_018303285.1	Candidatus Woesearchaeota	Nanoarchaeia	DPANN	20	0	0	12.5	0	0	0	0	0	0	0
GCA_023484345.1_ASM2348434v1_genomic	GCA_023484345.1	Candidatus Pacearchaeota	Nanoarchaeia	DPANN	0	33.3	0	12.5	0	0	0	0	0	0	0
GCA_001791825.1_ASM179182v1_genomic	GCA_001791825.1	Candidatus Woesearchaeota	Nanoarchaeia	DPANN	0	0	0	12.5	0	0	0	0	0	0	0
GCA_017608445.1_ASM1760844v1_genomic	GCA_017608445.1	Candidatus Woesearchaeota	Nanoarchaeia	DPANN	60	50	100	37.5	0	0	0	0	0	0	0
[truncated: 2,579 more rows]
