# Supplementary material for: Archaeal lineages related to eukaryotes encode functional diterpenoid cyclases
Source: Research Square preprint supplement (doi:10.21203/rs.3.rs-6009237/v1), 2025-02-27
Supplement: Supplementary file 4 [file c0e565afb868a1f5af86ccc3.xlsx]

## Sheet: Caption
Supplementary Table 1. Overview of the archaea database constructed in this study, organized into separate tabs by major taxonomic groups (e.g., Euryarchaeota, TACK, Asgard, and DPANN). Each tab contains the following information for each genome: assembly accession, GTDB‐Tk taxonomy, organism name, organism group, strain, BioSample, BioProject, assembly level, genome size (Mb), GC content, number…

## Sheet: EURYS
Assembly	GTDBTK TAXONOMY	Organism Name	Organism Groups	Strain	BioSample	BioProject	Level	Size(Mb)	GC%	Replicons	WGS	Scaffolds	CDS	Release Date	GenBank FTP	RefSeq FTP
GCA_021731385.1	d__Archaea;p__Altiarchaeota;c__Altiarchaeia;o__IMC4;f__QMZM01;g__JAKFXM01;s__JAKFXM01 sp021731385	Euryarchaeota archaeon	Archaea;Euryarchaeota;unclassified Euryarchaeota	ND3_Bin_21	SAMN14080619	PRJNA533545	Scaffold	1.30257	39.3		JAKFXM01	233	0	2022-01-31T00:00:00Z	ftp://ftp.ncbi.nlm.nih.gov/genomes/all/GCA/021/731/385/GCA_021731385.1_ASM2173138v1
GCA_001515195.1	d__Archaea;p__Hadarchaeota;c__Hadarchaeia;o__Hadarchaeales;f__Hadarchaeaceae;g__;s__	Hadesarchaea archaeon DG-33-1	Archaea;Euryarchaeota;Hadesarchaea	DG-33-1	SAMN04385804	PRJNA270657	Scaffold	0.928769	51.2		LQHJ01	53	951	2016-01-14T00:00:00Z	ftp://ftp.ncbi.nlm.nih.gov/genomes/all/GCA/001/515/195/GCA_001515195.1_DG-33-1
GCA_002779005.1	d__Archaea;p__Hadarchaeota;c__Hadarchaeia;o__Hadarchaeales;f__Hadarchaeaceae;g__;s__	Hadesarchaea archaeon CG08_land_8_20_14_0_20_51_8	Archaea;Euryarchaeota;Hadesarchaea	CG08_land_8_20_14_0_20_51_8	SAMN06659270	PRJNA362739	Scaffold	0.617632	50.9		PEXR01	78	721	2017-11-16T00:00:00Z	ftp://ftp.ncbi.nlm.nih.gov/genomes/all/GCA/002/779/005/GCA_002779005.1_ASM277900v1
GCA_001515185.1	d__Archaea;p__Hadarchaeota;c__Hadarchaeia;o__Hadarchaeales;f__Hadarchaeaceae;g__DG-33;s__DG-33 sp001515185	Hadesarchaea archaeon DG-33	Archaea;Euryarchaeota;Hadesarchaea	DG-33	SAMN04385803	PRJNA270657	Scaffold	0.786381	50.5		LQHI01	77	862	2016-01-14T00:00:00Z	ftp://ftp.ncbi.nlm.nih.gov/genomes/all/GCA/001/515/185/GCA_001515185.1_DG-33
GCA_014361095.1	d__Archaea;p__Hadarchaeota;c__Hadarchaeia;o__Hadarchaeales;f__Hadarchaeaceae;g__Hadarchaeum;s__Hadarchaeum sp014361095	Hadesarchaea archaeon	Archaea;Euryarchaeota;Hadesarchaea	MAG-18	SAMN15637568	PRJNA635524	Scaffold	1.19606	51.9		JACIWF01	181	1359	2020-09-01T00:00:00Z	ftp://ftp.ncbi.nlm.nih.gov/genomes/all/GCA/014/361/095/GCA_014361095.1_ASM1436109v1
GCA_002494625.1	d__Archaea;p__Halobacteriota;c__Archaeoglobi;o__Archaeoglobales;f__Archaeoglobaceae;g__Archaeoglobus_A;s__Archaeoglobus_A sp002494625	Archaeoglobus sp. UBA234	Archaea;Euryarchaeota;Archaeoglobi	UBA234	SAMN06027495	PRJNA348753	Scaffold	2.09083	41		DACH01	22	0	2017-10-10T00:00:00Z	ftp://ftp.ncbi.nlm.nih.gov/genomes/all/GCA/002/494/625/GCA_002494625.1_ASM249462v1
GCA_000385565.1	d__Archaea;p__Halobacteriota;c__Archaeoglobi;o__Archaeoglobales;f__Archaeoglobaceae;g__Archaeoglobus_A;s__Archaeoglobus_A sulfaticallidus	Archaeoglobus sulfaticallidus PM70-1	Archaea;Euryarchaeota;Archaeoglobi	PM70-1	SAMN02028569	PRJNA196460	Complete	2.07693	43.2	chromosome:NC_021169.1/CP005290.1		1	2217	2013-04-30T00:00:00Z	ftp://ftp.ncbi.nlm.nih.gov/genomes/all/GCA/000/385/565/GCA_000385565.1_ASM38556v1	ftp://ftp.ncbi.nlm.nih.gov/genomes/all/GCF/000/385/565/GCF_000385565.1_ASM38556v1
GCA_000025285.1	d__Archaea;p__Halobacteriota;c__Archaeoglobi;o__Archaeoglobales;f__Archaeoglobaceae;g__Archaeoglobus_B;s__Archaeoglobus_B profundus	Archaeoglobus profundus DSM 5631	Archaea;Euryarchaeota;Archaeoglobi	DSM 5631	SAMN00017459	PRJNA32583	Complete	1.56342	41.9961	chromosome:NC_013741.1/CP001857.1; plasmid pArcpr01:NC_013742.1/CP001858.1		2	1814	2010-01-19T00:00:00Z	ftp://ftp.ncbi.nlm.nih.gov/genomes/all/GCA/000/025/285/GCA_000025285.1_ASM2528v1	ftp://ftp.ncbi.nlm.nih.gov/genomes/all/GCF/000/025/285/GCF_000025285.1_ASM2528v1
GCA_000194625.1	d__Archaea;p__Halobacteriota;c__Archaeoglobi;o__Archaeoglobales;f__Archaeoglobaceae;g__Archaeoglobus_C;s__Archaeoglobus_C veneficus	Archaeoglobus veneficus SNP6	Archaea;Euryarchaeota;Archaeoglobi	SNP6	SAMN00713598	PRJNA51621	Complete	1.90194	47	chromosome:NC_015320.1/CP002588.1		1	2109	2011-03-31T00:00:00Z	ftp://ftp.ncbi.nlm.nih.gov/genomes/all/GCA/000/194/625/GCA_000194625.1_ASM19462v1	ftp://ftp.ncbi.nlm.nih.gov/genomes/all/GCF/000/194/625/GCF_000194625.1_ASM19462v1
GCA_000734035.1	d__Archaea;p__Halobacteriota;c__Archaeoglobi;o__Archaeoglobales;f__Archaeoglobaceae;g__Archaeoglobus;s__Archaeoglobus fulgidus	Archaeoglobus fulgidus DSM 8774	Archaea;Euryarchaeota;Archaeoglobi	DSM 8774	SAMN03081472	PRJNA208006	Complete	2.31629	48.1	chromosome:NZ_CP006577.1/CP006577.1		1	2582	2014-07-28T00:00:00Z	ftp://ftp.ncbi.nlm.nih.gov/genomes/all/GCA/000/734/035/GCA_000734035.1_ASM73403v1	ftp://ftp.ncbi.nlm.nih.gov/genomes/all/GCF/000/734/035/GCF_000734035.1_ASM73403v1
GCA_000008665.1	d__Archaea;p__Halobacteriota;c__Archaeoglobi;o__Archaeoglobales;f__Archaeoglobaceae;g__Archaeoglobus;s__Archaeoglobus fulgidus	Archaeoglobus fulgidus DSM 4304	Archaea;Euryarchaeota;Archaeoglobi	DSM 4304	SAMN02603985	PRJNA104	Complete	2.1784	48.6	chromosome:NC_000917.1/AE000782.1		1	2450	1997-12-17T00:00:00Z	ftp://ftp.ncbi.nlm.nih.gov/genomes/all/GCA/000/008/665/GCA_000008665.1_ASM866v1	ftp://ftp.ncbi.nlm.nih.gov/genomes/all/GCF/000/008/665/GCF_000008665.1_ASM866v1
GCA_002507545.1	d__Archaea;p__Halobacteriota;c__Archaeoglobi;o__Archaeoglobales;f__Archaeoglobaceae;g__Archaeoglobus;s__Archaeoglobus sp002507545	Archaeoglobus sp. UBA230	Archaea;Euryarchaeota;Archaeoglobi	UBA230	SAMN06027201	PRJNA348753	Scaffold	2.27465	44.3		DAVR01	50	0	2017-10-10T00:00:00Z	ftp://ftp.ncbi.nlm.nih.gov/genomes/all/GCA/002/507/545/GCA_002507545.1_ASM250754v1
GCA_002494665.1	d__Archaea;p__Halobacteriota;c__Archaeoglobi;o__Archaeoglobales;f__Archaeoglobaceae;g__Archaeoglobus;s__Archaeoglobus sp002507545	Archaeoglobus sp. UBA236	Archaea;Euryarchaeota;Archaeoglobi	UBA236	SAMN06027493	PRJNA348753	Scaffold	2.22733	43.9		DACI01	75	0	2017-10-10T00:00:00Z	ftp://ftp.ncbi.nlm.nih.gov/genomes/all/GCA/002/494/665/GCA_002494665.1_ASM249466v1
GCA_000025505.1	d__Archaea;p__Halobacteriota;c__Archaeoglobi;o__Archaeoglobales;f__Archaeoglobaceae;g__Ferroglobus;s__Ferroglobus placidus	Ferroglobus placidus DSM 10642	Archaea;Euryarchaeota;Archaeoglobi	DSM 10642	SAMN02598503	PRJNA33635	Complete	2.19627	44.1	chromosome:NC_013849.1/CP001899.1		1	2523	2010-02-16T00:00:00Z	ftp://ftp.ncbi.nlm.nih.gov/genomes/all/GCA/000/025/505/GCA_000025505.1_ASM2550v1	ftp://ftp.ncbi.nlm.nih.gov/genomes/all/GCF/000/025/505/GCF_000025505.1_ASM2550v1
GCA_001006045.1	d__Archaea;p__Halobacteriota;c__Archaeoglobi;o__Archaeoglobales;f__Archaeoglobaceae;g__Geoglobus;s__Geoglobus ahangari	Geoglobus ahangari	Archaea;Euryarchaeota;Archaeoglobi	234	SAMN02988852	PRJNA258102	Complete	1.77009	53.1	chromosome:NZ_CP011267.1/CP011267.1		1	2015	2015-05-11T00:00:00Z	ftp://ftp.ncbi.nlm.nih.gov/genomes/all/GCA/001/006/045/GCA_001006045.1_ASM100604v1	ftp://ftp.ncbi.nlm.nih.gov/genomes/all/GCF/001/006/045/GCF_001006045.1_ASM100604v1
GCA_013151125.1	d__Archaea;p__Halobacteriota;c__Archaeoglobi;o__Archaeoglobales;f__Archaeoglobaceae;g__Geoglobus;s__Geoglobus ahangari	Archaeoglobi archaeon	Archaea;Euryarchaeota;Archaeoglobi	M_MetaBat.67	SAMN12405721	PRJNA557557	Scaffold	1.35204	54.7		JAADIT01	163	1635	2020-05-22T00:00:00Z	ftp://ftp.ncbi.nlm.nih.gov/genomes/all/GCA/013/151/125/GCA_013151125.1_ASM1315112v1
GCA_002507275.1	d__Archaea;p__Halobacteriota;c__Archaeoglobi;o__Archaeoglobales;f__Archaeoglobaceae;g__Geoglobus;s__Geoglobus sp002494725	Geoglobus sp. UBA232	Archaea;Euryarchaeota;Archaeoglobi	UBA232	SAMN06027497	PRJNA348753	Scaffold	1.52134	44		DAZK01	70	0	2017-10-10T00:00:00Z	ftp://ftp.ncbi.nlm.nih.gov/genomes/all/GCA/002/507/275/GCA_002507275.1_ASM250727v1
GCA_003935005.1	d__Archaea;p__Halobacteriota;c__Archaeoglobi;o__Archaeoglobales;f__JdFR-42;g__JdFR-42;s__JdFR-42 sp002010305	Archaeoglobi archaeon	Archaea;Euryarchaeota;Archaeoglobi	rG16	SAMN10474933	PRJNA266365	Scaffold	2.12852	40.2		RSFX01	21	0	2018-12-11T00:00:00Z	ftp://ftp.ncbi.nlm.nih.gov/genomes/all/GCA/003/935/005/GCA_003935005.1_ASM393500v1
GCA_014361185.1	d__Archaea;p__Halobacteriota;c__Archaeoglobi;o__JdFR-21;f__JdFR-21;g__JdFR-21;s__	Archaeoglobi archaeon	Archaea;Euryarchaeota;Archaeoglobi	MAG-15	SAMN15637565	PRJNA635524	Scaffold	0.952564	45.2		JACIWC01	232	1198	2020-09-01T00:00:00Z	ftp://ftp.ncbi.nlm.nih.gov/genomes/all/GCA/014/361/185/GCA_014361185.1_ASM1436118v1
GCA_017885325.1	d__Archaea;p__Halobacteriota;c__Bog-38;o__Bog-38;f__Bog-38;g__Bog-38;s__	Euryarchaeota archaeon	Archaea;Euryarchaeota;unclassified Euryarchaeota	bin_36	SAMN17914718	PRJNA667178	Scaffold	0.792615	50.9		JAFNGH01	208	0	2021-04-08T00:00:00Z	ftp://ftp.ncbi.nlm.nih.gov/genomes/all/GCA/017/885/325/GCA_017885325.1_ASM1788532v1
GCA_017885205.1	d__Archaea;p__Halobacteriota;c__Bog-38;o__Bog-38;f__Bog-38;g__Bog-38;s__	Euryarchaeota archaeon	Archaea;Euryarchaeota;unclassified Euryarchaeota	bin_42	SAMN17914724	PRJNA667178	Scaffold	0.505986	52		JAFNGN01	128	0	2021-04-08T00:00:00Z	ftp://ftp.ncbi.nlm.nih.gov/genomes/all/GCA/017/885/205/GCA_017885205.1_ASM1788520v1
GCA_003139855.1	d__Archaea;p__Halobacteriota;c__Bog-38;o__Bog-38;f__Bog-38;g__Bog-38;s__Bog-38 sp003139855	Euryarchaeota archaeon	Archaea;Euryarchaeota;unclassified Euryarchaeota	bog_38	SAMN08179195	PRJNA386568	Scaffold	2.05918	51.7		PLGY01	76	0	2018-05-18T00:00:00Z	ftp://ftp.ncbi.nlm.nih.gov/genomes/all/GCA/003/139/855/GCA_003139855.1_20110800_S2M
GCA_003163455.1	d__Archaea;p__Halobacteriota;c__Bog-38;o__Bog-38;f__Bog-38;g__Bog-38;s__Bog-38 sp003139855	Euryarchaeota archaeon	Archaea;Euryarchaeota;unclassified Euryarchaeota	bog_83	SAMN08180201	PRJNA386568	Scaffold	2.03252	51.7		PLWI01	97	0	2018-05-25T00:00:00Z	ftp://ftp.ncbi.nlm.nih.gov/genomes/all/GCA/003/163/455/GCA_003163455.1_20120800_S1X
GCA_003139895.1	d__Archaea;p__Halobacteriota;c__Bog-38;o__Bog-38;f__Bog-38;g__Bog-38;s__Bog-38 sp003139855	Euryarchaeota archaeon	Archaea;Euryarchaeota;unclassified Euryarchaeota	bog_36	SAMN08179186	PRJNA386568	Scaffold	1.99049	51.6		PLHG01	91	0	2018-05-18T00:00:00Z	ftp://ftp.ncbi.nlm.nih.gov/genomes/all/GCA/003/139/895/GCA_003139895.1_20110800_S2D
GCA_003166275.1	d__Archaea;p__Halobacteriota;c__Bog-38;o__Bog-38;f__Bog-38;g__Bog-38;s__Bog-38 sp003139855	Euryarchaeota archaeon	Archaea;Euryarchaeota;unclassified Euryarchaeota	bog_23	SAMN08178990	PRJNA386568	Scaffold	1.97162	51.7		PMWE01	119	0	2018-05-25T00:00:00Z	ftp://ftp.ncbi.nlm.nih.gov/genomes/all/GCA/003/166/275/GCA_003166275.1_20110700_S2M
GCA_003141075.1	d__Archaea;p__Halobacteriota;c__Bog-38;o__Bog-38;f__Bog-38;g__Bog-38;s__Bog-38 sp003139855	Euryarchaeota archaeon	Archaea;Euryarchaeota;unclassified Euryarchaeota	bog_81	SAMN08180182	PRJNA386568	Scaffold	1.92143	51.6		PLKL01	137	0	2018-05-18T00:00:00Z	ftp://ftp.ncbi.nlm.nih.gov/genomes/all/GCA/003/141/075/GCA_003141075.1_20120800_S1D
GCA_003159695.1	d__Archaea;p__Halobacteriota;c__Bog-38;o__Bog-38;f__Bog-38;g__Bog-38;s__Bog-38 sp003139855	Euryarchaeota archaeon	Archaea;Euryarchaeota;unclassified Euryarchaeota	bog_74	SAMN08180037	PRJNA386568	Scaffold	1.44265	51.5		PLPZ01	98	0	2018-05-24T00:00:00Z	ftp://ftp.ncbi.nlm.nih.gov/genomes/all/GCA/003/159/695/GCA_003159695.1_20120700_S2X
GCA_003165375.1	d__Archaea;p__Halobacteriota;c__Bog-38;o__Bog-38;f__Bog-38;g__Bog-38;s__Bog-38 sp003139855	Euryarchaeota archaeon	Archaea;Euryarchaeota;unclassified Euryarchaeota	bog_72	SAMN08179945	PRJNA386568	Scaffold	1.84432	51.6		PLTM01	178	0	2018-05-25T00:00:00Z	ftp://ftp.ncbi.nlm.nih.gov/genomes/all/GCA/003/165/375/GCA_003165375.1_20120700_S1D
GCA_003156255.1	d__Archaea;p__Halobacteriota;c__Bog-38;o__Bog-38;f__Bog-38;g__Bog-38;s__Bog-38 sp003139855	Euryarchaeota archaeon	Archaea;Euryarchaeota;unclassified Euryarchaeota	bog_56	SAMN08179656	PRJNA386568	Scaffold	1.63057	51.7		PMGQ01	169	0	2018-05-24T00:00:00Z	ftp://ftp.ncbi.nlm.nih.gov/genomes/all/GCA/003/156/255/GCA_003156255.1_20120600_S2D
GCA_003163595.1	d__Archaea;p__Halobacteriota;c__Bog-38;o__Bog-38;f__Bog-38;g__Bog-38;s__Bog-38 sp003139855	Euryarchaeota archaeon	Archaea;Euryarchaeota;unclassified Euryarchaeota	bog_84	SAMN08180227	PRJNA386568	Scaffold	1.45381	51.8		PLVJ01	129	0	2018-05-25T00:00:00Z	ftp://ftp.ncbi.nlm.nih.gov/genomes/all/GCA/003/163/595/GCA_003163595.1_20120800_S2X
GCA_003139235.1	d__Archaea;p__Halobacteriota;c__Bog-38;o__Bog-38;f__Bog-38;g__Bog-38;s__Bog-38 sp003139855	Euryarchaeota archaeon	Archaea;Euryarchaeota;unclassified Euryarchaeota	bog_35	SAMN08179161	PRJNA386568	Scaffold	1.36714	51.9		PLIF01	142	0	2018-05-18T00:00:00Z	ftp://ftp.ncbi.nlm.nih.gov/genomes/all/GCA/003/139/235/GCA_003139235.1_20110800_S1D
GCA_003138595.1	d__Archaea;p__Halobacteriota;c__Bog-38;o__Bog-38;f__Bog-38;g__Bog-38;s__Bog-38 sp003139855	Euryarchaeota archaeon	Archaea;Euryarchaeota;unclassified Euryarchaeota	bog_39	SAMN08179206	PRJNA386568	Scaffold	1.43994	51.7		PLGO01	134	0	2018-05-18T00:00:00Z	ftp://ftp.ncbi.nlm.nih.gov/genomes/all/GCA/003/138/595/GCA_003138595.1_20110800_S3D
GCA_003160575.1	d__Archaea;p__Halobacteriota;c__Bog-38;o__Bog-38;f__Bog-38;g__Bog-38;s__Bog-38 sp003139855	Euryarchaeota archaeon	Archaea;Euryarchaeota;unclassified Euryarchaeota	bog_73	SAMN08180015	PRJNA386568	Scaffold	1.32064	51.6		PLQV01	123	0	2018-05-24T00:00:00Z	ftp://ftp.ncbi.nlm.nih.gov/genomes/all/GCA/003/160/575/GCA_003160575.1_20120700_S1X
GCA_003168795.1	d__Archaea;p__Halobacteriota;c__Bog-38;o__Bog-38;f__Bog-38;g__Bog-38;s__Bog-38 sp003139855	Euryarchaeota archaeon	Archaea;Euryarchaeota;unclassified Euryarchaeota	bog_15	SAMN08178861	PRJNA386568	Scaffold	1.23015	51.7		PMRI01	182	0	2018-05-25T00:00:00Z	ftp://ftp.ncbi.nlm.nih.gov/genomes/all/GCA/003/168/795/GCA_003168795.1_20110600_S3M
GCA_003169565.1	d__Archaea;p__Halobacteriota;c__Bog-38;o__Bog-38;f__Bog-38;g__Bog-38;s__Bog-38 sp003139855	Euryarchaeota archaeon	Archaea;Euryarchaeota;unclassified Euryarchaeota	bog_14	SAMN08178831	PRJNA386568	Scaffold	1.14952	51.4		PMQE01	161	0	2018-05-25T00:00:00Z	ftp://ftp.ncbi.nlm.nih.gov/genomes/all/GCA/003/169/565/GCA_003169565.1_20110600_S2D
GCA_003167795.1	d__Archaea;p__Halobacteriota;c__Bog-38;o__Bog-38;f__Bog-38;g__Bog-38;s__Bog-38 sp003139855	Euryarchaeota archaeon	Archaea;Euryarchaeota;unclassified Euryarchaeota	bog_21	SAMN08178972	PRJNA386568	Scaffold	1.03957	51.8		PMVN01	175	0	2018-05-25T00:00:00Z	ftp://ftp.ncbi.nlm.nih.gov/genomes/all/GCA/003/167/795/GCA_003167795.1_20110700_S2D
GCA_003159635.1	d__Archaea;p__Halobacteriota;c__Bog-38;o__Bog-38;f__Bog-38;g__Bog-38;s__Bog-38 sp003158275	Euryarchaeota archaeon	Archaea;Euryarchaeota;unclassified Euryarchaeota	bog_75	SAMN08180039	PRJNA386568	Scaffold	1.79048	51.8		PLPX01	141	0	2018-05-24T00:00:00Z	ftp://ftp.ncbi.nlm.nih.gov/genomes/all/GCA/003/159/635/GCA_003159635.1_20120700_S3D
GCA_003159405.1	d__Archaea;p__Halobacteriota;c__Bog-38;o__Bog-38;f__Bog-38;g__Bog-38;s__Bog-38 sp003158275	Euryarchaeota archaeon	Archaea;Euryarchaeota;unclassified Euryarchaeota	bog_76	SAMN08180060	PRJNA386568	Scaffold	1.72373	51.6		PLPC01	204	0	2018-05-24T00:00:00Z	ftp://ftp.ncbi.nlm.nih.gov/genomes/all/GCA/003/159/405/GCA_003159405.1_20120700_S3X
GCA_003158275.1	d__Archaea;p__Halobacteriota;c__Bog-38;o__Bog-38;f__Bog-38;g__Bog-38;s__Bog-38 sp003158275	Euryarchaeota archaeon	Archaea;Euryarchaeota;unclassified Euryarchaeota	fen_53	SAMN08179605	PRJNA386568	Scaffold	2.0975	51.4		PMIN01	252	0	2018-05-24T00:00:00Z	ftp://ftp.ncbi.nlm.nih.gov/genomes/all/GCA/003/158/275/GCA_003158275.1_20120600_E3D
GCA_003171015.1	d__Archaea;p__Halobacteriota;c__Bog-38;o__Bog-38;f__Bog-38;g__Bog-38;s__Bog-38 sp003162175	Euryarchaeota archaeon	Archaea;Euryarchaeota;unclassified Euryarchaeota	fen_25	SAMN08179033	PRJNA386568	Scaffold	1.85096	52.1		PMXU01	62	0	2018-05-25T00:00:00Z	ftp://ftp.ncbi.nlm.nih.gov/genomes/all/GCA/003/171/015/GCA_003171015.1_20110800_E1M
GCA_003162175.1	d__Archaea;p__Halobacteriota;c__Bog-38;o__Bog-38;f__Bog-38;g__Bog-38;s__Bog-38 sp003162175	Euryarchaeota archaeon	Archaea;Euryarchaeota;unclassified Euryarchaeota	fen_3	SAMN08178736	PRJNA386568	Scaffold	1.81896	52.2		PMMR01	69	0	2018-05-25T00:00:00Z	ftp://ftp.ncbi.nlm.nih.gov/genomes/all/GCA/003/162/175/GCA_003162175.1_20100900_E2D
GCA_003158935.1	d__Archaea;p__Halobacteriota;c__Bog-38;o__Bog-38;f__Bog-38;g__Bog-38;s__Bog-38 sp003162175	Euryarchaeota archaeon	Archaea;Euryarchaeota;unclassified Euryarchaeota	fen_45	SAMN08179524	PRJNA386568	Scaffold	1.77436	52.2		PMLP01	66	0	2018-05-24T00:00:00Z	ftp://ftp.ncbi.nlm.nih.gov/genomes/all/GCA/003/158/935/GCA_003158935.1_20120600_E1D
GCA_003155735.1	d__Archaea;p__Halobacteriota;c__Bog-38;o__Bog-38;f__Bog-38;g__Bog-38;s__Bog-38 sp003162175	Euryarchaeota archaeon	Archaea;Euryarchaeota;unclassified Euryarchaeota	fen_62	SAMN08179721	PRJNA386568	Scaffold	1.82766	52.1		PMEE01	66	0	2018-05-24T00:00:00Z	ftp://ftp.ncbi.nlm.nih.gov/genomes/all/GCA/003/155/735/GCA_003155735.1_20120700_E2X
GCA_003162075.1	d__Archaea;p__Halobacteriota;c__Bog-38;o__Bog-38;f__Bog-38;g__Bog-38;s__Bog-38 sp003162175	Euryarchaeota archaeon	Archaea;Euryarchaeota;unclassified Euryarchaeota	fen_6	SAMN08178746	PRJNA386568	Scaffold	1.17398	52.6		PMMZ01	43	0	2018-05-25T00:00:00Z	ftp://ftp.ncbi.nlm.nih.gov/genomes/all/GCA/003/162/075/GCA_003162075.1_20100900_E3D
GCA_003168535.1	d__Archaea;p__Halobacteriota;c__Bog-38;o__Bog-38;f__Bog-38;g__Bog-38;s__Bog-38 sp003162175	Euryarchaeota archaeon	Archaea;Euryarchaeota;unclassified Euryarchaeota	fen_17	SAMN08178876	PRJNA386568	Scaffold	1.79207	52.1		PMRX01	109	0	2018-05-25T00:00:00Z	ftp://ftp.ncbi.nlm.nih.gov/genomes/all/GCA/003/168/535/GCA_003168535.1_20110700_E1D
GCA_003155875.1	d__Archaea;p__Halobacteriota;c__Bog-38;o__Bog-38;f__Bog-38;g__Bog-38;s__Bog-38 sp003162175	Euryarchaeota archaeon	Archaea;Euryarchaeota;unclassified Euryarchaeota	fen_58	SAMN08179708	PRJNA386568	Scaffold	1.76738	52.2		PMEQ01	104	0	2018-05-24T00:00:00Z	ftp://ftp.ncbi.nlm.nih.gov/genomes/all/GCA/003/155/875/GCA_003155875.1_20120700_E1M
GCA_003162535.1	d__Archaea;p__Halobacteriota;c__Bog-38;o__Bog-38;f__Bog-38;g__Bog-38;s__Bog-38 sp003162175	Euryarchaeota archaeon	Archaea;Euryarchaeota;unclassified Euryarchaeota	fen_11	SAMN08178765	PRJNA386568	Scaffold	1.81852	52.2		PMNS01	98	0	2018-05-25T00:00:00Z	ftp://ftp.ncbi.nlm.nih.gov/genomes/all/GCA/003/162/535/GCA_003162535.1_20110600_E2D
GCA_003154225.1	d__Archaea;p__Halobacteriota;c__Bog-38;o__Bog-38;f__Bog-38;g__Bog-38;s__Bog-38 sp003162175	Euryarchaeota archaeon	Archaea;Euryarchaeota;unclassified Euryarchaeota	fen_64	SAMN08179757	PRJNA386568	Scaffold	1.80986	52.2		PMCV01	97	0	2018-05-24T00:00:00Z	ftp://ftp.ncbi.nlm.nih.gov/genomes/all/GCA/003/154/225/GCA_003154225.1_20120700_E3M
GCA_003157355.1	d__Archaea;p__Halobacteriota;c__Bog-38;o__Bog-38;f__Bog-38;g__Bog-38;s__Bog-38 sp003162175	Euryarchaeota archaeon	Archaea;Euryarchaeota;unclassified Euryarchaeota	fen_52	SAMN08179584	PRJNA386568	Scaffold	1.64081	52		PMJH01	135	0	2018-05-24T00:00:00Z	ftp://ftp.ncbi.nlm.nih.gov/genomes/all/GCA/003/157/355/GCA_003157355.1_20120600_E3D
GCA_003168395.1	d__Archaea;p__Halobacteriota;c__Bog-38;o__Bog-38;f__Bog-38;g__Bog-38;s__Bog-38 sp003162175	Euryarchaeota archaeon	Archaea;Euryarchaeota;unclassified Euryarchaeota	fen_20	SAMN08178884	PRJNA386568	Scaffold	1.67464	52.3		PMSF01	173	0	2018-05-25T00:00:00Z	ftp://ftp.ncbi.nlm.nih.gov/genomes/all/GCA/003/168/395/GCA_003168395.1_20110700_E3M
GCA_003142045.1	d__Archaea;p__Halobacteriota;c__Bog-38;o__Bog-38;f__Bog-38;g__Bog-38;s__Bog-38 sp003162175	Euryarchaeota archaeon	Archaea;Euryarchaeota;unclassified Euryarchaeota	fen_77	SAMN08180079	PRJNA386568	Scaffold	1.69895	52.1		PLOJ01	165	0	2018-05-18T00:00:00Z	ftp://ftp.ncbi.nlm.nih.gov/genomes/all/GCA/003/142/045/GCA_003142045.1_20120800_E1D
GCA_003171385.1	d__Archaea;p__Halobacteriota;c__Bog-38;o__Bog-38;f__Bog-38;g__Bog-38;s__Bog-38 sp003162175	Euryarchaeota archaeon	Archaea;Euryarchaeota;unclassified Euryarchaeota	fen_26	SAMN08179036	PRJNA386568	Scaffold	1.71978	52.2		PMXX01	167	0	2018-05-25T00:00:00Z	ftp://ftp.ncbi.nlm.nih.gov/genomes/all/GCA/003/171/385/GCA_003171385.1_20110800_E1S
GCA_003155855.1	d__Archaea;p__Halobacteriota;c__Bog-38;o__Bog-38;f__Bog-38;g__Bog-38;s__Bog-38 sp003162175	Euryarchaeota archaeon	Archaea;Euryarchaeota;unclassified Euryarchaeota	fen_59	SAMN08179709	PRJNA386568	Scaffold	1.63256	52.3		PMEP01	188	0	2018-05-24T00:00:00Z	ftp://ftp.ncbi.nlm.nih.gov/genomes/all/GCA/003/155/855/GCA_003155855.1_20120700_E1S
GCA_003142655.1	d__Archaea;p__Halobacteriota;c__Bog-38;o__Bog-38;f__Bog-38;g__Bog-38;s__Bog-38 sp003162175	Euryarchaeota archaeon	Archaea;Euryarchaeota;unclassified Euryarchaeota	fen_79	SAMN08180115	PRJNA386568	Scaffold	1.61969	52.2		PLNA01	184	0	2018-05-18T00:00:00Z	ftp://ftp.ncbi.nlm.nih.gov/genomes/all/GCA/003/142/655/GCA_003142655.1_20120800_E2S
GCA_003162195.1	d__Archaea;p__Halobacteriota;c__Bog-38;o__Bog-38;f__Bog-38;g__Bog-38;s__Bog-38 sp003162175	Euryarchaeota archaeon	Archaea;Euryarchaeota;unclassified Euryarchaeota	fen_2	SAMN08178734	PRJNA386568	Scaffold	1.72292	52		PMMP01	170	0	2018-05-25T00:00:00Z	ftp://ftp.ncbi.nlm.nih.gov/genomes/all/GCA/003/162/195/GCA_003162195.1_20100900_E1S
GCA_003157805.1	d__Archaea;p__Halobacteriota;c__Bog-38;o__Bog-38;f__Bog-38;g__Bog-38;s__Bog-38 sp003162175	Euryarchaeota archaeon	Archaea;Euryarchaeota;unclassified Euryarchaeota	fen_49	SAMN08179551	PRJNA386568	Scaffold	1.57073	52.1		PMKO01	168	0	2018-05-24T00:00:00Z	ftp://ftp.ncbi.nlm.nih.gov/genomes/all/GCA/003/157/805/GCA_003157805.1_20120600_E2D
GCA_003133305.1	d__Archaea;p__Halobacteriota;c__Bog-38;o__Bog-38;f__Bog-38;g__Bog-38;s__Bog-38 sp003162175	Euryarchaeota archaeon	Archaea;Euryarchaeota;unclassified Euryarchaeota	palsa_44	SAMN08179465	PRJNA386568	Scaffold	1.50909	52.2		PKWV01	176	0	2018-05-18T00:00:00Z	ftp://ftp.ncbi.nlm.nih.gov/genomes/all/GCA/003/133/305/GCA_003133305.1_20120500_P28
GCA_003161665.1	d__Archaea;p__Halobacteriota;c__Bog-38;o__Bog-38;f__Bog-38;g__Bog-38;s__Bog-38 sp003162175	Euryarchaeota archaeon	Archaea;Euryarchaeota;unclassified Euryarchaeota	fen_13	SAMN08178770	PRJNA386568	Scaffold	1.64563	51.9		PMNX01	193	0	2018-05-25T00:00:00Z	ftp://ftp.ncbi.nlm.nih.gov/genomes/all/GCA/003/161/665/GCA_003161665.1_20110600_E3M
GCA_003168415.1	d__Archaea;p__Halobacteriota;c__Bog-38;o__Bog-38;f__Bog-38;g__Bog-38;s__Bog-38 sp003162175	Euryarchaeota archaeon	Archaea;Euryarchaeota;unclassified Euryarchaeota	fen_19	SAMN08178882	PRJNA386568	Scaffold	1.52743	52.1		PMSD01	209	0	2018-05-25T00:00:00Z	ftp://ftp.ncbi.nlm.nih.gov/genomes/all/GCA/003/168/415/GCA_003168415.1_20110700_E2M
GCA_003170775.1	d__Archaea;p__Halobacteriota;c__Bog-38;o__Bog-38;f__Bog-38;g__Bog-38;s__Bog-38 sp003162175	Euryarchaeota archaeon	Archaea;Euryarchaeota;unclassified Euryarchaeota	fen_30	SAMN08179056	PRJNA386568	Scaffold	1.63672	51.9		PMYQ01	196	0	2018-05-25T00:00:00Z	ftp://ftp.ncbi.nlm.nih.gov/genomes/all/GCA/003/170/775/GCA_003170775.1_20110800_E2M
GCA_003161735.1	d__Archaea;p__Halobacteriota;c__Bog-38;o__Bog-38;f__Bog-38;g__Bog-38;s__Bog-38 sp003162175	Euryarchaeota archaeon	Archaea;Euryarchaeota;unclassified Euryarchaeota	fen_12	SAMN08178768	PRJNA386568	Scaffold	1.43852	52		PMNV01	191	0	2018-05-25T00:00:00Z	ftp://ftp.ncbi.nlm.nih.gov/genomes/all/GCA/003/161/735/GCA_003161735.1_20110600_E3D
GCA_003156955.1	d__Archaea;p__Halobacteriota;c__Bog-38;o__Bog-38;f__Bog-38;g__Bog-38;s__Bog-38 sp003162175	Euryarchaeota archaeon	Archaea;Euryarchaeota;unclassified Euryarchaeota	fen_55	SAMN08179616	PRJNA386568	Scaffold	1.4192	52.4		PMID01	210	0	2018-05-24T00:00:00Z	ftp://ftp.ncbi.nlm.nih.gov/genomes/all/GCA/003/156/955/GCA_003156955.1_20120600_E3M
GCA_003155755.1	d__Archaea;p__Halobacteriota;c__Bog-38;o__Bog-38;f__Bog-38;g__Bog-38;s__Bog-38 sp003162175	Euryarchaeota archaeon	Archaea;Euryarchaeota;unclassified Euryarchaeota	fen_61	SAMN08179715	PRJNA386568	Scaffold	1.56135	52.1		PMEK01	189	0	2018-05-24T00:00:00Z	ftp://ftp.ncbi.nlm.nih.gov/genomes/all/GCA/003/155/755/GCA_003155755.1_20120700_E2D
GCA_003162745.1	d__Archaea;p__Halobacteriota;c__Bog-38;o__Bog-38;f__Bog-38;g__Bog-38;s__Bog-38 sp003162175	Euryarchaeota archaeon	Archaea;Euryarchaeota;unclassified Euryarchaeota	fen_1	SAMN08178721	PRJNA386568	Scaffold	1.49035	51.8		PMMC01	205	0	2018-05-25T00:00:00Z	ftp://ftp.ncbi.nlm.nih.gov/genomes/all/GCA/003/162/745/GCA_003162745.1_20100900_E1D
GCA_003132625.1	d__Archaea;p__Halobacteriota;c__Bog-38;o__Bog-38;f__Bog-38;g__Bog-38;s__Bog-38 sp003162175	Euryarchaeota archaeon	Archaea;Euryarchaeota;unclassified Euryarchaeota	palsa_43	SAMN08179423	PRJNA386568	Scaffold	1.41417	52.3		PKYL01	189	0	2018-05-18T00:00:00Z	ftp://ftp.ncbi.nlm.nih.gov/genomes/all/GCA/003/132/625/GCA_003132625.1_20120500_P19
GCA_003168515.1	d__Archaea;p__Halobacteriota;c__Bog-38;o__Bog-38;f__Bog-38;g__Bog-38;s__Bog-38 sp003162175	Euryarchaeota archaeon	Archaea;Euryarchaeota;unclassified Euryarchaeota	fen_18	SAMN08178878	PRJNA386568	Scaffold	1.41053	52.4		PMRZ01	244	0	2018-05-25T00:00:00Z	ftp://ftp.ncbi.nlm.nih.gov/genomes/all/GCA/003/168/515/GCA_003168515.1_20110700_E1M
GCA_003161795.1	d__Archaea;p__Halobacteriota;c__Bog-38;o__Bog-38;f__Bog-38;g__Bog-38;s__Bog-38 sp003162175	Euryarchaeota archaeon	Archaea;Euryarchaeota;unclassified Euryarchaeota	fen_10	SAMN08178764	PRJNA386568	Scaffold	1.27126	52.5		PMNR01	241	0	2018-05-25T00:00:00Z	ftp://ftp.ncbi.nlm.nih.gov/genomes/all/GCA/003/161/795/GCA_003161795.1_20110600_E1D
GCA_003136455.1	d__Archaea;p__Halobacteriota;c__Bog-38;o__Bog-38;f__Bog-38;g__Bog-38;s__Bog-38 sp003162175	Euryarchaeota archaeon	Archaea;Euryarchaeota;unclassified Euryarchaeota	fen_40	SAMN08179257	PRJNA386568	Scaffold	1.22441	52.2		PLEP01	230	0	2018-05-18T00:00:00Z	ftp://ftp.ncbi.nlm.nih.gov/genomes/all/GCA/003/136/455/GCA_003136455.1_20111000_E2D
GCA_003137055.1	d__Archaea;p__Halobacteriota;c__Bog-38;o__Bog-38;f__Bog-38;g__Bog-38;s__Bog-38 sp003162175	Euryarchaeota archaeon	Archaea;Euryarchaeota;unclassified Euryarchaeota	fen_41	SAMN08179259	PRJNA386568	Scaffold	0.871603	51.9		PLEN01	174	0	2018-05-18T00:00:00Z	ftp://ftp.ncbi.nlm.nih.gov/genomes/all/GCA/003/137/055/GCA_003137055.1_20111000_E3D
GCA_003170615.1	d__Archaea;p__Halobacteriota;c__Bog-38;o__Bog-38;f__Bog-38;g__Bog-38;s__Bog-38 sp003162175	Euryarchaeota archaeon	Archaea;Euryarchaeota;unclassified Euryarchaeota	fen_32	SAMN08179065	PRJNA386568	Scaffold	1.18836	52.1		PMYZ01	225	0	2018-05-25T00:00:00Z	ftp://ftp.ncbi.nlm.nih.gov/genomes/all/GCA/003/170/615/GCA_003170615.1_20110800_E2S
GCA_003170935.1	d__Archaea;p__Halobacteriota;c__Bog-38;o__Bog-38;f__Bog-38;g__Bog-38;s__Bog-38 sp003170935	Euryarchaeota archaeon	Archaea;Euryarchaeota;unclassified Euryarchaeota	fen_29	SAMN08179040	PRJNA386568	Scaffold	1.79446	48.7		PMYA01	186	0	2018-05-25T00:00:00Z	ftp://ftp.ncbi.nlm.nih.gov/genomes/all/GCA/003/170/935/GCA_003170935.1_20110800_E2D
GCA_003141775.1	d__Archaea;p__Halobacteriota;c__Bog-38;o__Bog-38;f__Bog-38;g__Bog-38;s__Bog-38 sp003170935	Euryarchaeota archaeon	Archaea;Euryarchaeota;unclassified Euryarchaeota	fen_78	SAMN08180103	PRJNA386568	Scaffold	1.1873	47.8		PLNM01	230	0	2018-05-18T00:00:00Z	ftp://ftp.ncbi.nlm.nih.gov/genomes/all/GCA/003/141/775/GCA_003141775.1_20120800_E2D
GCA_900156425.1	d__Archaea;p__Halobacteriota;c__Halobacteria;o__Halobacteriales;f__Haladaptataceae;g__Haladaptatus;s__Haladaptatus litoreus	Haladaptatus litoreus	Archaea;Euryarchaeota;Stenosarchaea group	CGMCC 1.7737	SAMN05421858	PRJEB18898	Scaffold	4.67171	57		FTNO01	11	4713	2017-01-14T00:00:00Z	ftp://ftp.ncbi.nlm.nih.gov/genomes/all/GCA/900/156/425/GCA_900156425.1_IMG-taxon_2681812914_annotated_assembly	ftp://ftp.ncbi.nlm.nih.gov/genomes/all/GCF/900/156/425/GCF_900156425.1_IMG-taxon_2681812914_annotated_assembly
GCA_020700235.1	d__Archaea;p__Halobacteriota;c__Halobacteria;o__Halobacteriales;f__Haladaptataceae;g__Haladaptatus;s__Haladaptatus pallidirubidus	Haladaptatus pallidirubidus	Archaea;Euryarchaeota;Stenosarchaea group	YIM 93656	SAMN22364628	PRJNA772083	Complete	6.27052	56.0896	chromosome:NZ_CP085301.1/CP085301.1; plasmid unnamed1:NZ_CP085302.1/CP085302.1; plasmid unnamed2:NZ_CP085303.1/CP085303.1; plasmid unnamed3:NZ_CP085304.1/CP085304.1; plasmid unnamed4:NZ_CP085305.1/CP085305.1; plasmid unnamed5:NZ_CP085306.1/CP085306.1; plasmid unnamed6:NZ_CP085307.1/CP085307.1		7	6240	2021-11-01T00:00:00Z	ftp://ftp.ncbi.nlm.nih.gov/genomes/all/GCA/020/700/235/GCA_020700235.1_ASM2070023v1	ftp://ftp.ncbi.nlm.nih.gov/genomes/all/GCF/020/700/235/GCF_020700235.1_ASM2070023v1
GCA_020614375.1	d__Archaea;p__Halobacteriota;c__Halobacteria;o__Halobacteriales;f__Haladaptataceae;g__Haladaptatus;s__Haladaptatus sp020614375	Haladaptatus sp. PSR8	Archaea;Euryarchaeota;Stenosarchaea group	PSR8	SAMN22363859	PRJNA772078	Complete	5.03526	62.1114	chromosome:NZ_CP085327.1/CP085327.1; plasmid unnamed1:NZ_CP085328.1/CP085328.1; plasmid unnamed2:NZ_CP085329.1/CP085329.1; plasmid unnamed3:NZ_CP085330.1/CP085330.1; plasmid unnamed4:NZ_CP085331.1/CP085331.1; plasmid unnamed5:NZ_CP085332.1/CP085332.1; plasmid unnamed6:NZ_CP085333.1/CP085333.1; plasmid unnamed7:NZ_CP085334.1/CP085334.1		8	5032	2021-10-26T00:00:00Z	ftp://ftp.ncbi.nlm.nih.gov/genomes/all/GCA/020/614/375/GCA_020614375.1_ASM2061437v1	ftp://ftp.ncbi.nlm.nih.gov/genomes/all/GCF/020/614/375/GCF_020614375.1_ASM2061437v1
GCA_024227995.1	d__Archaea;p__Halobacteriota;c__Halobacteria;o__Halobacteriales;f__Haladaptataceae;g__Haladaptatus;s__Haladaptatus sp024227995	Halobacteriaceae archaeon GSLN9	Archaea;Euryarchaeota;Stenosarchaea group	GSLN9	SAMN29438988	PRJNA854382	Complete	3.72198	67.875	chromosome:CP100465.1; plasmid unnamed1:CP100466.1; plasmid unnamed2:CP100467.1; plasmid unnamed3:CP100468.1		4	0	2022-07-13T00:00:00Z
GCA_003022025.1	d__Archaea;p__Halobacteriota;c__Halobacteria;o__Halobacteriales;f__Haladaptataceae;g__Halorussus;s__	Halobacteriales archaeon QS_1_67_19	Archaea;Euryarchaeota;Stenosarchaea group	QS_1_67_19	SAMN06020770	PRJNA351262	Scaffold	2.08038	67		PXRF01	26	2028	2018-03-27T00:00:00Z	ftp://ftp.ncbi.nlm.nih.gov/genomes/all/GCA/003/022/025/GCA_003022025.1_ASM302202v1
GCA_004143485.2	d__Archaea;p__Halobacteriota;c__Halobacteria;o__Halobacteriales;f__Haladaptataceae;g__Halorussus;s__Halorussus amylolyticus	Halorussus amylolyticus	Archaea;Euryarchaeota;Stenosarchaea group	YC93	SAMN10601653	PRJNA510302	Scaffold	3.77926	64.6		RXOB02	20	3776	2019-02-06T00:00:00Z	ftp://ftp.ncbi.nlm.nih.gov/genomes/all/GCA/004/143/485/GCA_004143485.2_ASM414348v2	ftp://ftp.ncbi.nlm.nih.gov/genomes/all/GCF/004/143/485/GCF_004143485.2_ASM414348v2
GCA_004765805.1	d__Archaea;p__Halobacteriota;c__Halobacteria;o__Halobacteriales;f__Haladaptataceae;g__Halorussus;s__Halorussus halobius	Halorussus halobius	Archaea;Euryarchaeota;Stenosarchaea group	HD8-83	SAMN10721430	PRJNA514221	Scaffold	3.93395	67.3		SBIU01	17	3909	2019-03-29T00:00:00Z	ftp://ftp.ncbi.nlm.nih.gov/genomes/all/GCA/004/765/805/GCA_004765805.1_ASM476580v1	ftp://ftp.ncbi.nlm.nih.gov/genomes/all/GCF/004/765/805/GCF_004765805.1_ASM476580v1
GCA_008831545.1	d__Archaea;p__Halobacteriota;c__Halobacteria;o__Halobacteriales;f__Haladaptataceae;g__Halorussus;s__Halorussus halophilus	Halorussus halophilus	Archaea;Euryarchaeota;Stenosarchaea group	ZS-3	SAMN12860083	PRJNA574568	Complete	4.45073	61.5286	chromosome:NZ_CP044523.1/CP044523.1; plasmid unnamed1:NZ_CP044524.1/CP044524.1; plasmid unnamed2:NZ_CP044525.1/CP044525.1; plasmid unnamed3:NZ_CP044526.1/CP044526.1		4	4364	2019-10-07T00:00:00Z	ftp://ftp.ncbi.nlm.nih.gov/genomes/all/GCA/008/831/545/GCA_008831545.1_ASM883154v1	ftp://ftp.ncbi.nlm.nih.gov/genomes/all/GCF/008/831/545/GCF_008831545.1_ASM883154v1
GCA_003382685.1	d__Archaea;p__Halobacteriota;c__Halobacteria;o__Halobacteriales;f__Haladaptataceae;g__Halorussus;s__Halorussus litoreus	Halorussus litoreus	Archaea;Euryarchaeota;Stenosarchaea group	HD8-51	SAMN09463971	PRJNA477233	Scaffold	3.83832	65.9		QLVG01	75	3649	2018-08-10T00:00:00Z	ftp://ftp.ncbi.nlm.nih.gov/genomes/all/GCA/003/382/685/GCA_003382685.1_ASM338268v1	ftp://ftp.ncbi.nlm.nih.gov/genomes/all/GCF/003/382/685/GCF_003382685.1_ASM338268v1
GCA_004765795.1	d__Archaea;p__Halobacteriota;c__Halobacteria;o__Halobacteriales;f__Haladaptataceae;g__Halorussus;s__Halorussus marinus	Halorussus marinus	Archaea;Euryarchaeota;Stenosarchaea group	LYG-36	SAMN10724292	PRJNA514410	Scaffold	3.76372	66.9		SBIV01	37	3752	2019-03-29T00:00:00Z	ftp://ftp.ncbi.nlm.nih.gov/genomes/all/GCA/004/765/795/GCA_004765795.1_ASM476579v1	ftp://ftp.ncbi.nlm.nih.gov/genomes/all/GCF/004/765/795/GCF_004765795.1_ASM476579v1
GCA_004087835.1	d__Archaea;p__Halobacteriota;c__Halobacteria;o__Halobacteriales;f__Haladaptataceae;g__Halorussus;s__Halorussus pelagicus	Halorussus pelagicus	Archaea;Euryarchaeota;Stenosarchaea group	RC-68	SAMN10724366	PRJNA514419	Complete	3.49092	63.7409	chromosome:NZ_CP035119.1/CP035119.1; plasmid unnamed1:NZ_CP035120.1/CP035120.1; plasmid unnamed2:NZ_CP035121.1/CP035121.1; plasmid unnamed3:NZ_CP035122.1/CP035122.1		4	3425	2019-01-21T00:00:00Z	ftp://ftp.ncbi.nlm.nih.gov/genomes/all/GCA/004/087/835/GCA_004087835.1_ASM408783v1	ftp://ftp.ncbi.nlm.nih.gov/genomes/all/GCF/004/087/835/GCF_004087835.1_ASM408783v1
GCA_004765785.1	d__Archaea;p__Halobacteriota;c__Halobacteria;o__Halobacteriales;f__Haladaptataceae;g__Halorussus;s__Halorussus ruber	Halorussus ruber	Archaea;Euryarchaeota;Stenosarchaea group	YC25	SAMN10721380	PRJNA514216	Scaffold	4.31831	64.2		SBIT01	31	4222	2019-03-29T00:00:00Z	ftp://ftp.ncbi.nlm.nih.gov/genomes/all/GCA/004/765/785/GCA_004765785.1_ASM476578v1	ftp://ftp.ncbi.nlm.nih.gov/genomes/all/GCF/004/765/785/GCF_004765785.1_ASM476578v1
GCA_004765815.2	d__Archaea;p__Halobacteriota;c__Halobacteria;o__Halobacteriales;f__Haladaptataceae;g__Halorussus;s__Halorussus salinus	Halorussus salinus	Archaea;Euryarchaeota;Stenosarchaea group	YJ-37-H	SAMN10721319	PRJNA514208	Scaffold	4.75324	65.1		SBIS02	11	4636	2019-03-29T00:00:00Z	ftp://ftp.ncbi.nlm.nih.gov/genomes/all/GCA/004/765/815/GCA_004765815.2_ASM476581v2	ftp://ftp.ncbi.nlm.nih.gov/genomes/all/GCF/004/765/815/GCF_004765815.2_ASM476581v2
GCA_003023465.1	d__Archaea;p__Halobacteriota;c__Halobacteria;o__Halobacteriales;f__Haladaptataceae;g__Halorussus;s__Halorussus sp003023465	Halobacteriales archaeon SW_6_65_15	Archaea;Euryarchaeota;Stenosarchaea group	SW_6_65_15	SAMN06020803	PRJNA351262	Scaffold	2.51076	65		PXSM01	169	2332	2018-03-27T00:00:00Z	ftp://ftp.ncbi.nlm.nih.gov/genomes/all/GCA/003/023/465/GCA_003023465.1_ASM302346v1
GCA_005239435.1	d__Archaea;p__Halobacteriota;c__Halobacteria;o__Halobacteriales;f__Haladaptataceae;g__Halorussus;s__Halorussus sp005239435	halophilic archaeon LT46	Archaea;Euryarchaeota;Stenosarchaea group	LT46	SAMN11155650	PRJNA527629	Scaffold	5.15461	63.3		SZNP01	17	0	2019-04-30T00:00:00Z	ftp://ftp.ncbi.nlm.nih.gov/genomes/all/GCA/005/239/435/GCA_005239435.1_ASM523943v1	ftp://ftp.ncbi.nlm.nih.gov/genomes/all/GCF/005/239/435/GCF_005239435.1_ASM523943v1
GCA_023238205.1	d__Archaea;p__Halobacteriota;c__Halobacteria;o__Halobacteriales;f__Haladaptataceae;g__Halorussus;s__Halorussus sp023238205	Halorussus sp. XZYJT49	Archaea;Euryarchaeota;Stenosarchaea group	XZYJT49	SAMN27747444	PRJNA831011	Complete	4.62494	65.0881	chromosome:NZ_CP096659.1/CP096659.1; plasmid unnamed1:NZ_CP096660.1/CP096660.1; plasmid unnamed2:NZ_CP096661.1/CP096661.1; plasmid unnamed3:NZ_CP096662.1/CP096662.1; plasmid unnamed4:NZ_CP096663.1/CP096663.1		5	4523	2022-05-04T00:00:00Z	ftp://ftp.ncbi.nlm.nih.gov/genomes/all/GCA/023/238/205/GCA_023238205.1_ASM2323820v1	ftp://ftp.ncbi.nlm.nih.gov/genomes/all/GCF/023/238/205/GCF_023238205.1_ASM2323820v1
GCA_023238445.1	d__Archaea;p__Halobacteriota;c__Halobacteria;o__Halobacteriales;f__Haladaptataceae;g__Halorussus;s__Halorussus sp023238445	Halorussus sp. XZYJT40	Archaea;Euryarchaeota;Stenosarchaea group	XZYJT40	SAMN27746577	PRJNA831001	Complete	3.66837	65.9	chromosome:NZ_CP096658.1/CP096658.1		1	3634	2022-05-04T00:00:00Z	ftp://ftp.ncbi.nlm.nih.gov/genomes/all/GCA/023/238/445/GCA_023238445.1_ASM2323844v1	ftp://ftp.ncbi.nlm.nih.gov/genomes/all/GCF/023/238/445/GCF_023238445.1_ASM2323844v1
GCA_024138125.1	d__Archaea;p__Halobacteriota;c__Halobacteria;o__Halobacteriales;f__Haladaptataceae;g__Halorussus;s__Halorussus sp024138125	Halorussus sp. YCN54	Archaea;Euryarchaeota;Stenosarchaea group	YCN54	SAMN29182972	PRJNA850522	Complete	3.59652	66.6632	chromosome:NZ_CP099993.1/CP099993.1; plasmid unnamed1:NZ_CP099994.1/CP099994.1; plasmid unnamed2:NZ_CP099995.1/CP099995.1; plasmid unnamed3:NZ_CP099996.1/CP099996.1		4	3533	2022-07-05T00:00:00Z		ftp://ftp.ncbi.nlm.nih.gov/genomes/all/GCF/024/138/125/GCF_024138125.1_ASM2413812v1
GCA_024138165.1	d__Archaea;p__Halobacteriota;c__Halobacteria;o__Halobacteriales;f__Haladaptataceae;g__Halorussus;s__Halorussus sp024138165	Halorussus sp. XZYJT10	Archaea;Euryarchaeota;Stenosarchaea group	XZYJT10	SAMN29182859	PRJNA850507	Complete	5.05107	66.1767	chromosome:NZ_CP100000.1/CP100000.1; plasmid unnamed1:NZ_CP100001.1/CP100001.1; plasmid unnamed2:NZ_CP100002.1/CP100002.1; plasmid unnamed3:NZ_CP100003.1/CP100003.1; plasmid unnamed4:NZ_CP100004.1/CP100004.1		5	4948	2022-07-05T00:00:00Z		ftp://ftp.ncbi.nlm.nih.gov/genomes/all/GCF/024/138/165/GCF_024138165.1_ASM2413816v1
GCA_024218795.1	d__Archaea;p__Halobacteriota;c__Halobacteria;o__Halobacteriales;f__Haladaptataceae;g__Halorussus;s__Halorussus sp024218795	Halorussus sp. XZYJ18	Archaea;Euryarchaeota;Stenosarchaea group	XZYJ18	SAMN29182851	PRJNA850505	Complete	4.73943	64.7503	chromosome:NZ_CP100400.1/CP100400.1; plasmid unnamed1:NZ_CP100401.1/CP100401.1; plasmid unnamed2:NZ_CP100403.1/CP100403.1; plasmid unnamed3:NZ_CP100402.1/CP100402.1		4	4653	2022-07-12T00:00:00Z		ftp://ftp.ncbi.nlm.nih.gov/genomes/all/GCF/024/218/795/GCF_024218795.1_ASM2421879v1
GCA_023544685.1	d__Archaea;p__Halobacteriota;c__Halobacteria;o__Halobacteriales;f__Halalkalicoccaceae;g__Halalkalicoccus;s__	Halalkalicoccus sp.	Archaea;Euryarchaeota;Stenosarchaea group	B4-06	SAMN28014433	PRJNA833668	Scaffold	2.53396	65.4		JAMJFT01	816	3067	2022-05-24T00:00:00Z	ftp://ftp.ncbi.nlm.nih.gov/genomes/all/GCA/023/544/685/GCA_023544685.1_ASM2354468v1
GCA_000196895.1	d__Archaea;p__Halobacteriota;c__Halobacteria;o__Halobacteriales;f__Halalkalicoccaceae;g__Halalkalicoccus;s__Halalkalicoccus jeotgali	Halalkalicoccus jeotgali B3	Archaea;Euryarchaeota;Stenosarchaea group	B3	SAMN02603490	PRJNA49517	Complete	3.69865	62.5582	chromosome:NC_014297.1/CP002062.1; plasmid 1:NC_014298.1/CP002063.1; plasmid 2:NC_014299.1/CP002064.1; plasmid 3:NC_014300.1/CP002065.1; plasmid 4:NC_014301.1/CP002066.1; plasmid 5:NC_014302.1/CP002067.1; plasmid 6:NC_014303.1/CP002068.1		7	3755	2010-06-23T00:00:00Z	ftp://ftp.ncbi.nlm.nih.gov/genomes/all/GCA/000/196/895/GCA_000196895.1_ASM19689v1	ftp://ftp.ncbi.nlm.nih.gov/genomes/all/GCF/000/196/895/GCF_000196895.1_ASM19689v1
GCA_000485535.1	d__Archaea;p__Halobacteriota;c__Halobacteria;o__Halobacteriales;f__Halalkalicoccaceae;g__Halalkalicoccus;s__Halalkalicoccus jeotgali	Halalkalicoccus jeotgali B3	Archaea;Euryarchaeota;Stenosarchaea group	B3	SAMN02440736	PRJNA64955	Scaffold	3.6375	62.6		AXZD01	35	3700	2013-10-25T00:00:00Z	ftp://ftp.ncbi.nlm.nih.gov/genomes/all/GCA/000/485/535/GCA_000485535.1_ASM48553v1	ftp://ftp.ncbi.nlm.nih.gov/genomes/all/GCF/000/485/535/GCF_000485535.1_ASM48553v1
GCA_022561895.1	d__Archaea;p__Halobacteriota;c__Halobacteria;o__Halobacteriales;f__Halalkalicoccaceae;g__Halalkalicoccus;s__Halalkalicoccus sp022561895	Euryarchaeota archaeon	Archaea;Euryarchaeota;unclassified Euryarchaeota	B79T1B8	SAMN16244095	PRJNA635214	Scaffold	2.93712	60.7		JADFQH01	392	3221	2022-03-14T00:00:00Z	ftp://ftp.ncbi.nlm.nih.gov/genomes/all/GCA/022/561/895/GCA_022561895.1_ASM2256189v1
GCA_017094445.1	d__Archaea;p__Halobacteriota;c__Halobacteria;o__Halobacteriales;f__Haloarculaceae;g__Halapricum;s__Halapricum desulfuricans	Halapricum desulfuricans	Archaea;Euryarchaeota;Stenosarchaea group	HSR-Bgl	SAMN16484195	PRJNA670125	Complete	3.07802	63.8777	chromosome:NZ_CP064789.1/CP064789.1; plasmid pHSR-Bgl01:NZ_CP064790.1/CP064790.1		2	2997	2021-03-01T00:00:00Z	ftp://ftp.ncbi.nlm.nih.gov/genomes/all/GCA/017/094/445/GCA_017094445.1_ASM1709444v1	ftp://ftp.ncbi.nlm.nih.gov/genomes/all/GCF/017/094/445/GCF_017094445.1_ASM1709444v1
GCA_017094525.1	d__Archaea;p__Halobacteriota;c__Halobacteria;o__Halobacteriales;f__Haloarculaceae;g__Halapricum;s__Halapricum desulfuricans	Halapricum desulfuricans	Archaea;Euryarchaeota;Stenosarchaea group	HSR12-2	SAMN16484277	PRJNA670125	Complete	2.89391	64	chromosome:NZ_CP064788.1/CP064788.1		1	2837	2021-03-01T00:00:00Z	ftp://ftp.ncbi.nlm.nih.gov/genomes/all/GCA/017/094/525/GCA_017094525.1_ASM1709452v1	ftp://ftp.ncbi.nlm.nih.gov/genomes/all/GCF/017/094/525/GCF_017094525.1_ASM1709452v1
GCA_004799665.1	d__Archaea;p__Halobacteriota;c__Halobacteria;o__Halobacteriales;f__Haloarculaceae;g__Halapricum;s__Halapricum salinum	Halapricum salinum	Archaea;Euryarchaeota;Stenosarchaea group	CBA1105	SAMN09711547	PRJNA482735	Complete	3.45206	63.7	chromosome:NZ_CP031310.1/CP031310.1		1	3379	2019-04-18T00:00:00Z	ftp://ftp.ncbi.nlm.nih.gov/genomes/all/GCA/004/799/665/GCA_004799665.1_ASM479966v1	ftp://ftp.ncbi.nlm.nih.gov/genomes/all/GCF/004/799/665/GCF_004799665.1_ASM479966v1
GCA_017094465.1	d__Archaea;p__Halobacteriota;c__Halobacteria;o__Halobacteriales;f__Haloarculaceae;g__Halapricum;s__Halapricum sp017094465	Halapricum desulfuricans	Archaea;Euryarchaeota;Stenosarchaea group	HSR-Est	SAMN16484257	PRJNA670125	Complete	2.88038	63.1357	chromosome:NZ_CP064791.1/CP064791.1; plasmid pHSR-Est01:NZ_CP064792.1/CP064792.1		2	2800	2021-03-01T00:00:00Z	ftp://ftp.ncbi.nlm.nih.gov/genomes/all/GCA/017/094/465/GCA_017094465.1_ASM1709446v1	ftp://ftp.ncbi.nlm.nih.gov/genomes/all/GCF/017/094/465/GCF_017094465.1_ASM1709446v1
GCA_017094505.1	d__Archaea;p__Halobacteriota;c__Halobacteria;o__Halobacteriales;f__Haloarculaceae;g__Halapricum;s__Halapricum sp017094505	Halapricum desulfuricans	Archaea;Euryarchaeota;Stenosarchaea group	HSR12-1	SAMN16484274	PRJNA670125	Complete	2.94034	64.7	chromosome:NZ_CP064787.1/CP064787.1		1	2887	2021-03-01T00:00:00Z	ftp://ftp.ncbi.nlm.nih.gov/genomes/all/GCA/017/094/505/GCA_017094505.1_ASM1709450v1	ftp://ftp.ncbi.nlm.nih.gov/genomes/all/GCF/017/094/505/GCF_017094505.1_ASM1709450v1
GCA_000827835.1	d__Archaea;p__Halobacteriota;c__Halobacteria;o__Halobacteriales;f__Haloarculaceae;g__Haloarcula;s__Haloarcula hispanica	Haloarcula sp. CBA1115	Archaea;Euryarchaeota;Stenosarchaea group	CBA1115	SAMN03278120	PRJNA271840	Complete	4.22505	61.9777	chromosome:NZ_CP010529.1/CP010529.1; plasmid unnamed1:NZ_CP010530.1/CP010530.1; plasmid unnamed2:NZ_CP010531.1/CP010531.1; plasmid unnamed3:NZ_CP010532.1/CP010532.1; plasmid unnamed4:NZ_CP010533.1/CP010533.1; plasmid unnamed5:NZ_CP010534.1/CP010534.1		6	4049	2015-01-23T00:00:00Z	ftp://ftp.ncbi.nlm.nih.gov/genomes/all/GCA/000/827/835/GCA_000827835.1_ASM82783v1	ftp://ftp.ncbi.nlm.nih.gov/genomes/all/GCF/000/827/835/GCF_000827835.1_ASM82783v1
GCA_000223905.1	d__Archaea;p__Halobacteriota;c__Halobacteria;o__Halobacteriales;f__Haloarculaceae;g__Haloarcula;s__Haloarcula hispanica	Haloarcula hispanica ATCC 33960	Archaea;Euryarchaeota;Stenosarchaea group	CGMCC 1.2049	SAMN02602960	PRJNA68523	Complete	3.89	62.4615	chromosome I:NC_015948.1/CP002921.1; chromosome II:NC_015943.1/CP002922.1; plasmid pHH400:NC_015944.1/CP002923.1		3	3803	2011-08-17T00:00:00Z	ftp://ftp.ncbi.nlm.nih.gov/genomes/all/GCA/000/223/905/GCA_000223905.1_ASM22390v1	ftp://ftp.ncbi.nlm.nih.gov/genomes/all/GCF/000/223/905/GCF_000223905.1_ASM22390v1
GCA_000504565.2	d__Archaea;p__Halobacteriota;c__Halobacteria;o__Halobacteriales;f__Haloarculaceae;g__Haloarcula;s__Haloarcula hispanica	Haloarcula hispanica N601	Archaea;Euryarchaeota;Stenosarchaea group	N601	SAMN02393367	PRJNA227070	Complete	3.9015	62.4661	chromosome 1:NC_023013.1/CP006884.1; chromosome 2:NC_023010.2/CP006885.2; plasmid pHH126:NC_023011.1/CP006886.1; plasmid pHH406:NC_023012.1/CP006887.1		4	3820	2013-12-09T00:00:00Z	ftp://ftp.ncbi.nlm.nih.gov/genomes/all/GCA/000/504/565/GCA_000504565.2_ASM50456v2	ftp://ftp.ncbi.nlm.nih.gov/genomes/all/GCF/000/504/565/GCF_000504565.1_ASM50456v2
GCA_004150385.1	d__Archaea;p__Halobacteriota;c__Halobacteria;o__Halobacteriales;f__Haloarculaceae;g__Haloarcula;s__Haloarcula hispanica	Haloarcula hispanica	Archaea;Euryarchaeota;Stenosarchaea group	18.1	SAMN10644066	PRJNA511758	Scaffold	3.58983	62.6		RZIG01	7	3529	2019-02-07T00:00:00Z	ftp://ftp.ncbi.nlm.nih.gov/genomes/all/GCA/004/150/385/GCA_004150385.1_ASM415038v1	ftp://ftp.ncbi.nlm.nih.gov/genomes/all/GCF/004/150/385/GCF_004150385.1_ASM415038v1
GCA_022807515.1	d__Archaea;p__Halobacteriota;c__Halobacteria;o__Halobacteriales;f__Haloarculaceae;g__Haloarcula;s__Haloarcula hispanica	Haloarcula hispanica	Archaea;Euryarchaeota;Stenosarchaea group	1.8	SAMN18082610	PRJNA705356	Scaffold	3.58983	62.6		JAFKAA01	7	3527	2022-04-01T00:00:00Z	ftp://ftp.ncbi.nlm.nih.gov/genomes/all/GCA/022/807/515/GCA_022807515.1_ASM2280751v1	ftp://ftp.ncbi.nlm.nih.gov/genomes/all/GCF/022/807/515/GCF_022807515.1_ASM2280751v1
GCA_001647155.1	d__Archaea;p__Halobacteriota;c__Halobacteria;o__Halobacteriales;f__Haloarculaceae;g__Haloarcula;s__Haloarcula hispanica	Haloarcula sp. K1	Archaea;Euryarchaeota;Stenosarchaea group	K1	SAMN04390187	PRJNA308270	Scaffold	4.3318	61.7		LRHL01	46	4255	2016-04-30T00:00:00Z	ftp://ftp.ncbi.nlm.nih.gov/genomes/all/GCA/001/647/155/GCA_001647155.1_ASM164715v1	ftp://ftp.ncbi.nlm.nih.gov/genomes/all/GCF/001/647/155/GCF_001647155.1_ASM164715v1
GCA_000011085.1	d__Archaea;p__Halobacteriota;c__Halobacteria;o__Halobacteriales;f__Haloarculaceae;g__Haloarcula;s__Haloarcula marismortui	Haloarcula marismortui ATCC 43049	Archaea;Euryarchaeota;Stenosarchaea group	ATCC 43049	SAMN02603385	PRJNA105	Complete	4.27464	61.1403	chromosome I:NC_006396.1/AY596297.1; chromosome II:NC_006397.1/AY596298.1; plasmid pNG100:NC_006389.1/AY596290.1; plasmid pNG200:NC_006390.1/AY596291.1; plasmid pNG300:NC_006391.1/AY596292.1; plasmid pNG400:NC_006392.1/AY596293.1; plasmid pNG500:NC_006393.1/AY596294.1; plasmid pNG600:NC_006394.1/AY596295.1; plasmid pNG700:NC_006395.1/AY596296.1		9	4231	2004-11-02T00:00:00Z	ftp://ftp.ncbi.nlm.nih.gov/genomes/all/GCA/000/011/085/GCA_000011085.1_ASM1108v1	ftp://ftp.ncbi.nlm.nih.gov/genomes/all/GCF/000/011/085/GCF_000011085.1_ASM1108v1
GCA_018200015.1	d__Archaea;p__Halobacteriota;c__Halobacteria;o__Halobacteriales;f__Haloarculaceae;g__Haloarcula;s__Haloarcula marismortui	Haloarcula sinaiiensis ATCC 33800	Archaea;Euryarchaeota;Stenosarchaea group	ATCC 33800	SAMN18811338	PRJNA412908	Complete	4.53713	60.6171	chromosome:NZ_CP073366.1/CP073366.1; plasmid pHsi55:NZ_CP073370.1/CP073370.1; plasmid pHsi117:NZ_CP073367.1/CP073367.1; plasmid pHsi139:NZ_CP073372.1/CP073372.1; plasmid pHsi204:NZ_CP073371.1/CP073371.1; plasmid pHsi388:NZ_CP073369.1/CP073369.1; plasmid pHsi540:NZ_CP073368.1/CP073368.1		7	4419	2021-04-29T00:00:00Z	ftp://ftp.ncbi.nlm.nih.gov/genomes/all/GCA/018/200/015/GCA_018200015.1_ASM1820001v1	ftp://ftp.ncbi.nlm.nih.gov/genomes/all/GCF/018/200/015/GCF_018200015.1_ASM1820001v1
GCA_005310945.1	d__Archaea;p__Halobacteriota;c__Halobacteria;o__Halobacteriales;f__Haloarculaceae;g__Haloarcula;s__Haloarcula marismortui	Haloarcula marismortui ATCC 43049	Archaea;Euryarchaeota;Stenosarchaea group	ATCC 43049	SAMN11356379	PRJNA412908	Complete	4.18492	61.1962	chromosome:NZ_CP039138.1/CP039138.1; plasmid pHMA33:NZ_CP039133.1/CP039133.1; plasmid pHMA34:NZ_CP039132.1/CP039132.1; plasmid pHMA133:NZ_CP039135.1/CP039135.1; plasmid pHMA155:NZ_CP039134.1/CP039134.1; plasmid pHMA288:NZ_CP039136.1/CP039136.1; plasmid pHMA411:NZ_CP039137.1/CP039137.1		7	4123	2019-05-14T00:00:00Z	ftp://ftp.ncbi.nlm.nih.gov/genomes/all/GCA/005/310/945/GCA_005310945.1_ASM531094v1	ftp://ftp.ncbi.nlm.nih.gov/genomes/all/GCF/005/310/945/GCF_005310945.1_ASM531094v1
GCA_011440255.1	d__Archaea;p__Halobacteriota;c__Halobacteria;o__Halobacteriales;f__Haloarculaceae;g__Haloarcula;s__Haloarcula marismortui	Haloarcula sp. JP-Z28	Archaea;Euryarchaeota;Stenosarchaea group	JP-Z28	SAMN14351821	PRJNA611896	Scaffold	4.52868	60.7		JAAOHT01	172	4410	2020-03-18T00:00:00Z	ftp://ftp.ncbi.nlm.nih.gov/genomes/all/GCA/011/440/255/GCA_011440255.1_ASM1144025v1	ftp://ftp.ncbi.nlm.nih.gov/genomes/all/GCF/011/440/255/GCF_011440255.1_ASM1144025v1
GCA_012726155.1	d__Archaea;p__Halobacteriota;c__Halobacteria;o__Halobacteriales;f__Haloarculaceae;g__Haloarcula;s__Haloarcula rubripromontorii	Haloarcula rubripromontorii	Archaea;Euryarchaeota;Stenosarchaea group	pws8	SAMN13475834	PRJNA593353	Scaffold	3.92899	62.2		WOWB01	9	3863	2020-04-23T00:00:00Z	ftp://ftp.ncbi.nlm.nih.gov/genomes/all/GCA/012/726/155/GCA_012726155.1_ASM1272615v1	ftp://ftp.ncbi.nlm.nih.gov/genomes/all/GCF/012/726/155/GCF_012726155.1_ASM1272615v1
GCA_010119195.1	d__Archaea;p__Halobacteriota;c__Halobacteria;o__Halobacteriales;f__Haloarculaceae;g__Haloarcula;s__Haloarcula salina	Halomicroarcula salina	Archaea;Euryarchaeota;Stenosarchaea group	YGHS18	SAMN13386515	PRJNA591661	Scaffold	3.7881	66.7		WRXL01	14	3770	2020-02-03T00:00:00Z	ftp://ftp.ncbi.nlm.nih.gov/genomes/all/GCA/010/119/195/GCA_010119195.1_ASM1011919v1	ftp://ftp.ncbi.nlm.nih.gov/genomes/all/GCF/010/119/195/GCF_010119195.1_ASM1011919v1
GCA_012726115.1	d__Archaea;p__Halobacteriota;c__Halobacteria;o__Halobacteriales;f__Haloarculaceae;g__Haloarcula;s__Haloarcula sebkhae	Haloarcula argentinensis	Archaea;Euryarchaeota;Stenosarchaea group	pws5	SAMN13475465	PRJNA593350	Scaffold	4.01327	61.3		WOWA01	11	3965	2020-04-23T00:00:00Z	ftp://ftp.ncbi.nlm.nih.gov/genomes/all/GCA/012/726/115/GCA_012726115.1_ASM1272611v1	ftp://ftp.ncbi.nlm.nih.gov/genomes/all/GCF/012/726/115/GCF_012726115.1_ASM1272611v1
GCA_014647415.1	d__Archaea;p__Halobacteriota;c__Halobacteria;o__Halobacteriales;f__Haloarculaceae;g__Haloarcula;s__Haloarcula sebkhae	Haloarcula sebkhae	Archaea;Euryarchaeota;Stenosarchaea group	JCM 19018	SAMD00245276	PRJDB10510	Scaffold	4.17022	61		BMPD01	26	4118	2020-09-11T00:00:00Z	ftp://ftp.ncbi.nlm.nih.gov/genomes/all/GCA/014/647/415/GCA_014647415.1_ASM1464741v1	ftp://ftp.ncbi.nlm.nih.gov/genomes/all/GCF/014/647/415/GCF_014647415.1_ASM1464741v1
GCA_002844335.1	d__Archaea;p__Halobacteriota;c__Halobacteria;o__Halobacteriales;f__Haloarculaceae;g__Haloarcula;s__Haloarcula taiwanensis	Haloarcula taiwanensis	Archaea;Euryarchaeota;Stenosarchaea group	Taiwanensis	SAMN06200074	PRJNA360060	Complete	3.72171	62.5329	chromosome I:NZ_CP019154.1/CP019154.1; chromosome II:NZ_CP019155.1/CP019155.1; plasmid pNYT1:NZ_CP019156.1/CP019156.1; plasmid pNYT2:NZ_CP019157.1/CP019157.1		4	3707	2017-12-18T00:00:00Z	ftp://ftp.ncbi.nlm.nih.gov/genomes/all/GCA/002/844/335/GCA_002844335.1_ASM284433v1	ftp://ftp.ncbi.nlm.nih.gov/genomes/all/GCF/002/844/335/GCF_002844335.1_ASM284433v1
GCA_900106715.1	d__Archaea;p__Halobacteriota;c__Halobacteria;o__Halobacteriales;f__Haloarculaceae;g__Haloarcula;s__Haloarcula vallismortis	Haloarcula vallismortis	Archaea;Euryarchaeota;Stenosarchaea group	DSM 3756	SAMN05443574	PRJEB16558	Scaffold	3.89664	61.8		FNOF01	55	3903	2016-10-22T00:00:00Z	ftp://ftp.ncbi.nlm.nih.gov/genomes/all/GCA/900/106/715/GCA_900106715.1_IMG-taxon_2693429892_annotated_assembly	ftp://ftp.ncbi.nlm.nih.gov/genomes/all/GCF/900/106/715/GCF_900106715.1_IMG-taxon_2693429892_annotated_assembly
GCA_003058365.1	d__Archaea;p__Halobacteriota;c__Halobacteria;o__Halobacteriales;f__Haloarculaceae;g__Halococcoides;s__Halococcoides cellulosivorans	Halococcoides cellulosivorans	Archaea;Euryarchaeota;Stenosarchaea group	HArcel1	SAMN08826612	PRJNA449302	Complete	2.72312	65.7	chromosome:NZ_CP028858.1/CP028858.1		1	2595	2018-04-21T00:00:00Z	ftp://ftp.ncbi.nlm.nih.gov/genomes/all/GCA/003/058/365/GCA_003058365.1_ASM305836v1	ftp://ftp.ncbi.nlm.nih.gov/genomes/all/GCF/003/058/365/GCF_003058365.1_ASM305836v1
GCA_007421925.1	d__Archaea;p__Halobacteriota;c__Halobacteria;o__Halobacteriales;f__Haloarculaceae;g__Haloglomus;s__Haloglomus irregulare	Haloglomus irregulare	Archaea;Euryarchaeota;Stenosarchaea group	F16-60	SAMN09473901	PRJNA477537	Scaffold	4.00436	68.1		QMDX01	53	3800	2019-07-24T00:00:00Z	ftp://ftp.ncbi.nlm.nih.gov/genomes/all/GCA/007/421/925/GCA_007421925.1_ASM742192v1	ftp://ftp.ncbi.nlm.nih.gov/genomes/all/GCF/007/421/925/GCF_007421925.1_ASM742192v1
GCA_003020985.1	d__Archaea;p__Halobacteriota;c__Halobacteria;o__Halobacteriales;f__Haloarculaceae;g__Haloglomus;s__Haloglomus sp003020985	Halobacteriales archaeon QS_4_70_19	Archaea;Euryarchaeota;Stenosarchaea group	QS_4_70_19	SAMN06020777	PRJNA351262	Scaffold	2.83864	69.7		PXRM01	46	2632	2018-03-27T00:00:00Z	ftp://ftp.ncbi.nlm.nih.gov/genomes/all/GCA/003/020/985/GCA_003020985.1_ASM302098v1
GCA_023699475.1	d__Archaea;p__Halobacteriota;c__Halobacteria;o__Halobacteriales;f__Haloarculaceae;g__Halomarina;s__Halomarina rubra	Halomarina rubra	Archaea;Euryarchaeota;Stenosarchaea group	ZS-47-S	SAMN27867787	PRJNA832571	Scaffold	4.06849	66.5		JALXFV01	16	4143	2022-06-08T00:00:00Z	ftp://ftp.ncbi.nlm.nih.gov/genomes/all/GCA/023/699/475/GCA_023699475.1_ASM2369947v1	ftp://ftp.ncbi.nlm.nih.gov/genomes/all/GCF/023/699/475/GCF_023699475.1_ASM2369947v1
GCA_003021975.1	d__Archaea;p__Halobacteriota;c__Halobacteria;o__Halobacteriales;f__Haloarculaceae;g__Halomarina;s__Halomarina sp003021975	Halobacteriales archaeon QS_5_70_17	Archaea;Euryarchaeota;Stenosarchaea group	QS_5_70_17	SAMN06020782	PRJNA351262	Scaffold	2.60643	70.4		PXRR01	78	2438	2018-03-27T00:00:00Z	ftp://ftp.ncbi.nlm.nih.gov/genomes/all/GCA/003/021/975/GCA_003021975.1_ASM302197v1
GCA_004681185.1	d__Archaea;p__Halobacteriota;c__Halobacteria;o__Halobacteriales;f__Haloarculaceae;g__Halomicroarcula;s__Halomicroarcula amylolytica	Halomicroarcula amylolytica	Archaea;Euryarchaeota;Stenosarchaea group	LR21	SAMN11269098	PRJNA529530	Scaffold	5.03856	62		SRIF01	34	4960	2019-04-05T00:00:00Z	ftp://ftp.ncbi.nlm.nih.gov/genomes/all/GCA/004/681/185/GCA_004681185.1_ASM468118v1	ftp://ftp.ncbi.nlm.nih.gov/genomes/all/GCF/004/681/185/GCF_004681185.1_ASM468118v1
GCA_011602445.1	d__Archaea;p__Halobacteriota;c__Halobacteria;o__Halobacteriales;f__Haloarculaceae;g__Halomicroarcula;s__Halomicroarcula pellucida	Haloarcula sp. JP-L23	Archaea;Euryarchaeota;Stenosarchaea group	JP-L23	SAMN14351922	PRJNA611898	Complete	4.93083	63.647	chromosome:NZ_CP050014.1/CP050014.1; plasmid unnamed1:NZ_CP050015.1/CP050015.1; plasmid unnamed2:NZ_CP050016.1/CP050016.1; plasmid unnamed3:NZ_CP050017.1/CP050017.1; plasmid unnamed4:NZ_CP050018.1/CP050018.1; plasmid unnamed5:NZ_CP050019.1/CP050019.1		6	4837	2020-03-21T00:00:00Z	ftp://ftp.ncbi.nlm.nih.gov/genomes/all/GCA/011/602/445/GCA_011602445.1_ASM1160244v1	ftp://ftp.ncbi.nlm.nih.gov/genomes/all/GCF/011/602/445/GCF_011602445.1_ASM1160244v1
GCA_019599485.1	d__Archaea;p__Halobacteriota;c__Halobacteria;o__Halobacteriales;f__Haloarculaceae;g__Halomicroarcula;s__Halomicroarcula salinisoli	Halomicroarcula salinisoli	Archaea;Euryarchaeota;Stenosarchaea group	F28	SAMN10397876	PRJNA504756	Scaffold	4.06725	63.9		RKLS01	12	4056	2021-08-14T00:00:00Z	ftp://ftp.ncbi.nlm.nih.gov/genomes/all/GCA/019/599/485/GCA_019599485.1_ASM1959948v1	ftp://ftp.ncbi.nlm.nih.gov/genomes/all/GCF/019/599/485/GCF_019599485.1_ASM1959948v1
GCA_019599405.1	d__Archaea;p__Halobacteriota;c__Halobacteria;o__Halobacteriales;f__Haloarculaceae;g__Halomicroarcula;s__Halomicroarcula salinisoli	Halomicroarcula salinisoli	Archaea;Euryarchaeota;Stenosarchaea group	F24A	SAMN10397798	PRJNA504750	Scaffold	4.02725	64.1		RKLQ01	10	3994	2021-08-14T00:00:00Z	ftp://ftp.ncbi.nlm.nih.gov/genomes/all/GCA/019/599/405/GCA_019599405.1_ASM1959940v1	ftp://ftp.ncbi.nlm.nih.gov/genomes/all/GCF/019/599/405/GCF_019599405.1_ASM1959940v1
GCA_003021755.1	d__Archaea;p__Halobacteriota;c__Halobacteria;o__Halobacteriales;f__Haloarculaceae;g__Halomicroarcula;s__Halomicroarcula sp003021755	Halobacteriales archaeon QH_8_67_36	Archaea;Euryarchaeota;Stenosarchaea group	QH_8_67_36	SAMN06020764	PRJNA351262	Scaffold	1.7293	66.6		PXQZ01	132	1678	2018-03-27T00:00:00Z	ftp://ftp.ncbi.nlm.nih.gov/genomes/all/GCA/003/021/755/GCA_003021755.1_ASM302175v1
GCA_024218775.1	d__Archaea;p__Halobacteriota;c__Halobacteria;o__Halobacteriales;f__Haloarculaceae;g__Halomicroarcula;s__Halomicroarcula sp024218775	Halomicroarcula sp. DT1	Archaea;Euryarchaeota;Stenosarchaea group	DT1	SAMN29406380	PRJNA853861	Complete	3.73965	65.1497	chromosome:NZ_CP100404.1/CP100404.1; plasmid unnamed1:NZ_CP100405.1/CP100405.1; plasmid unnamed2:NZ_CP100406.1/CP100406.1		3	3794	2022-07-12T00:00:00Z		ftp://ftp.ncbi.nlm.nih.gov/genomes/all/GCF/024/218/775/GCF_024218775.1_ASM2421877v1
GCA_024218815.1	d__Archaea;p__Halobacteriota;c__Halobacteria;o__Halobacteriales;f__Haloarculaceae;g__Halomicroarcula;s__Halomicroarcula sp024218775	Halomicroarcula sp. YSSS71	Archaea;Euryarchaeota;Stenosarchaea group	YSSS71	SAMN29406388	PRJNA853862	Complete	3.91018	64.6383	chromosome:NZ_CP100407.1/CP100407.1; plasmid unnamed1:NZ_CP100408.1/CP100408.1; plasmid unnamed2:NZ_CP100409.1/CP100409.1; plasmid unnamed3:NZ_CP100410.1/CP100410.1		4	3849	2022-07-12T00:00:00Z		ftp://ftp.ncbi.nlm.nih.gov/genomes/all/GCF/024/218/815/GCF_024218815.1_ASM2421881v1
GCA_000379085.1	d__Archaea;p__Halobacteriota;c__Halobacteria;o__Halobacteriales;f__Haloarculaceae;g__Halomicrobium;s__Halomicrobium katesii	Halomicrobium katesii DSM 19301	Archaea;Euryarchaeota;Stenosarchaea group	DSM 19301	SAMN02261322	PRJNA88127	Scaffold	3.60777	65		AQZY01	2	3529	2013-04-22T00:00:00Z	ftp://ftp.ncbi.nlm.nih.gov/genomes/all/GCA/000/379/085/GCA_000379085.1_ASM37908v1	ftp://ftp.ncbi.nlm.nih.gov/genomes/all/GCF/000/379/085/GCF_000379085.1_ASM37908v1
GCA_000023965.1	d__Archaea;p__Halobacteriota;c__Halobacteria;o__Halobacteriales;f__Haloarculaceae;g__Halomicrobium;s__Halomicrobium mukohataei	Halomicrobium mukohataei DSM 12286	Archaea;Euryarchaeota;Stenosarchaea group	DSM 12286	SAMN00002610	PRJNA27945	Complete	3.33235	65.5068	chromosome:NC_013202.1/CP001688.1; plasmid pHmuk01:NC_013201.1/CP001689.1		2	3311	2009-09-03T00:00:00Z	ftp://ftp.ncbi.nlm.nih.gov/genomes/all/GCA/000/023/965/GCA_000023965.1_ASM2396v1	ftp://ftp.ncbi.nlm.nih.gov/genomes/all/GCF/000/023/965/GCF_000023965.1_ASM2396v1
GCA_009217585.1	d__Archaea;p__Halobacteriota;c__Halobacteria;o__Halobacteriales;f__Haloarculaceae;g__Halomicrobium;s__Halomicrobium mukohataei	Halomicrobium sp. ZPS1	Archaea;Euryarchaeota;Stenosarchaea group	ZPS1	SAMN13024714	PRJNA577378	Complete	3.0942	65.6	chromosome:NZ_CP045142.1/CP045142.1		1	3112	2019-10-22T00:00:00Z	ftp://ftp.ncbi.nlm.nih.gov/genomes/all/GCA/009/217/585/GCA_009217585.1_ASM921758v1	ftp://ftp.ncbi.nlm.nih.gov/genomes/all/GCF/009/217/585/GCF_009217585.1_ASM921758v1
GCA_004803735.1	d__Archaea;p__Halobacteriota;c__Halobacteria;o__Halobacteriales;f__Haloarculaceae;g__Halomicrobium;s__Halomicrobium mukohataei	Halomicrobium mukohataei	Archaea;Euryarchaeota;Stenosarchaea group	JP60	SAMN11349655	PRJNA531092	Complete	3.31606	65.5063	chromosome:NZ_CP039375.1/CP039375.1; plasmid unnamed1:NZ_CP039376.1/CP039376.1		2	3279	2019-04-23T00:00:00Z	ftp://ftp.ncbi.nlm.nih.gov/genomes/all/GCA/004/803/735/GCA_004803735.1_ASM480373v1	ftp://ftp.ncbi.nlm.nih.gov/genomes/all/GCF/004/803/735/GCF_004803735.1_ASM480373v1
GCA_020405185.1	d__Archaea;p__Halobacteriota;c__Halobacteria;o__Halobacteriales;f__Haloarculaceae;g__Halomicrobium;s__Halomicrobium salinisoli	Halomicrobium salinisoli	Archaea;Euryarchaeota;Stenosarchaea group	LT50	SAMN21590223	PRJNA765798	Complete	3.84647	68.9617	chromosome:NZ_CP084463.1/CP084463.1; plasmid unnamed1:NZ_CP084464.1/CP084464.1; plasmid unnamed2:NZ_CP084465.1/CP084465.1		3	3712	2021-10-10T00:00:00Z	ftp://ftp.ncbi.nlm.nih.gov/genomes/all/GCA/020/405/185/GCA_020405185.1_ASM2040518v1	ftp://ftp.ncbi.nlm.nih.gov/genomes/all/GCF/020/405/185/GCF_020405185.1_ASM2040518v1
GCA_020405245.1	d__Archaea;p__Halobacteriota;c__Halobacteria;o__Halobacteriales;f__Haloarculaceae;g__Halomicrobium;s__Halomicrobium salinisoli	Halomicrobium salinisoli	Archaea;Euryarchaeota;Stenosarchaea group	TH30	SAMN21590330	PRJNA765798	Complete	4.14655	68.2441	chromosome:NZ_CP084466.1/CP084466.1; plasmid unnamed1:NZ_CP084467.1/CP084467.1; plasmid unnamed2:NZ_CP084468.1/CP084468.1		3	3934	2021-10-10T00:00:00Z	ftp://ftp.ncbi.nlm.nih.gov/genomes/all/GCA/020/405/245/GCA_020405245.1_ASM2040524v1	ftp://ftp.ncbi.nlm.nih.gov/genomes/all/GCF/020/405/245/GCF_020405245.1_ASM2040524v1
GCA_012726095.1	d__Archaea;p__Halobacteriota;c__Halobacteria;o__Halobacteriales;f__Haloarculaceae;g__Halomicrobium;s__Halomicrobium sp009617995	Halomicrobium mukohataei	Archaea;Euryarchaeota;Stenosarchaea group	pws1	SAMN13475456	PRJNA593347	Scaffold	3.39584	65.6		WOYG01	3	3376	2020-04-23T00:00:00Z	ftp://ftp.ncbi.nlm.nih.gov/genomes/all/GCA/012/726/095/GCA_012726095.1_ASM1272609v1	ftp://ftp.ncbi.nlm.nih.gov/genomes/all/GCF/012/726/095/GCF_012726095.1_ASM1272609v1
GCA_017612575.1	d__Archaea;p__Halobacteriota;c__Halobacteria;o__Halobacteriales;f__Haloarculaceae;g__Halomicrobium;s__Halomicrobium sp009617995	Halomicrobium sp. IBSBa	Archaea;Euryarchaeota;Stenosarchaea group	IBSBa	SAMN16385344	PRJNA667829	Scaffold	3.36741	65.7		JADPQC01	85	3390	2021-03-29T00:00:00Z	ftp://ftp.ncbi.nlm.nih.gov/genomes/all/GCA/017/612/575/GCA_017612575.1_ASM1761257v1	ftp://ftp.ncbi.nlm.nih.gov/genomes/all/GCF/017/612/575/GCF_017612575.1_ASM1761257v1
GCA_020217425.1	d__Archaea;p__Halobacteriota;c__Halobacteria;o__Halobacteriales;f__Haloarculaceae;g__Halomicrobium;s__Halomicrobium urmianum	Halosiccatus urmianus	Archaea;Euryarchaeota;Stenosarchaea group	IBRC-M: 10911	SAMN21591356	PRJNA765798	Complete	4.2547	67.2841	chromosome:NZ_CP084090.1/CP084090.1; plasmid unnamed1:NZ_CP084091.1/CP084091.1; plasmid unnamed2:NZ_CP084092.1/CP084092.1; plasmid unnamed3:NZ_CP084093.1/CP084093.1; plasmid unnamed4:NZ_CP084094.1/CP084094.1; plasmid unnamed5:NZ_CP084095.1/CP084095.1		6	4107	2021-10-03T00:00:00Z	ftp://ftp.ncbi.nlm.nih.gov/genomes/all/GCA/020/217/425/GCA_020217425.1_ASM2021742v1	ftp://ftp.ncbi.nlm.nih.gov/genomes/all/GCF/020/217/425/GCF_020217425.1_ASM2021742v1
GCA_900114435.1	d__Archaea;p__Halobacteriota;c__Halobacteria;o__Halobacteriales;f__Haloarculaceae;g__Halomicrobium;s__Halomicrobium zhouii	Halomicrobium zhouii	Archaea;Euryarchaeota;Stenosarchaea group	CGMCC 1.10457	SAMN05216559	PRJEB17444	Scaffold	4.25033	66.2		FOZK01	6	4056	2016-11-01T00:00:00Z	ftp://ftp.ncbi.nlm.nih.gov/genomes/all/GCA/900/114/435/GCA_900114435.1_IMG-taxon_2667527389_annotated_assembly	ftp://ftp.ncbi.nlm.nih.gov/genomes/all/GCF/900/114/435/GCF_900114435.1_IMG-taxon_2667527389_annotated_assembly
GCA_004944975.1	d__Archaea;p__Halobacteriota;c__Halobacteria;o__Halobacteriales;f__Haloarculaceae;g__Halorhabdus;s__Halorhabdus amylolytica	Halorhabdus amylolytica	Archaea;Euryarchaeota;Stenosarchaea group	H27	SAMN11242248	PRJNA528692	Scaffold	3.46493	62.1		SPQG01	26	3319	2019-04-30T00:00:00Z	ftp://ftp.ncbi.nlm.nih.gov/genomes/all/GCA/004/944/975/GCA_004944975.1_ASM494497v1	ftp://ftp.ncbi.nlm.nih.gov/genomes/all/GCF/004/944/975/GCF_004944975.1_ASM494497v1
GCA_013839425.1	d__Archaea;p__Halobacteriota;c__Halobacteria;o__Halobacteriales;f__Haloarculaceae;g__Halorhabdus;s__Halorhabdus salina	Halorhabdus salina	Archaea;Euryarchaeota;Stenosarchaea group	FL145	SAMN15463067	PRJNA644521	Scaffold	2.85981	61.5		JACDNP01	25	2722	2020-07-28T00:00:00Z	ftp://ftp.ncbi.nlm.nih.gov/genomes/all/GCA/013/839/425/GCA_013839425.1_ASM1383942v1	ftp://ftp.ncbi.nlm.nih.gov/genomes/all/GCF/013/839/425/GCF_013839425.1_ASM1383942v1
GCA_009690625.1	d__Archaea;p__Halobacteriota;c__Halobacteria;o__Halobacteriales;f__Haloarculaceae;g__Halorhabdus;s__Halorhabdus sp009690625	Halorhabdus sp. CBA1104	Archaea;Euryarchaeota;Stenosarchaea group	CBA1104	SAMN10411009	PRJNA505116	Complete	2.62839	62.3	chromosome:NZ_CP033878.1/CP033878.1		1	2526	2019-11-22T00:00:00Z	ftp://ftp.ncbi.nlm.nih.gov/genomes/all/GCA/009/690/625/GCA_009690625.1_ASM969062v1	ftp://ftp.ncbi.nlm.nih.gov/genomes/all/GCF/009/690/625/GCF_009690625.1_ASM969062v1
GCA_000470655.1	d__Archaea;p__Halobacteriota;c__Halobacteria;o__Halobacteriales;f__Haloarculaceae;g__Halorhabdus;s__Halorhabdus tiamatea	Halorhabdus tiamatea SARL4B	Archaea;Euryarchaeota;Stenosarchaea group	type strain: SARL4B	SAMEA2271992	PRJEB1233	Complete	3.14616	62.77	chromosome I:NC_021921.1/HF571520.1; plasmid pHTIA:NC_021913.1/HF571521.1		2	3056	2013-08-01T00:00:00Z	ftp://ftp.ncbi.nlm.nih.gov/genomes/all/GCA/000/470/655/GCA_000470655.1_HATI1	ftp://ftp.ncbi.nlm.nih.gov/genomes/all/GCF/000/470/655/GCF_000470655.1_HATI1
GCA_000023945.1	d__Archaea;p__Halobacteriota;c__Halobacteria;o__Halobacteriales;f__Haloarculaceae;g__Halorhabdus;s__Halorhabdus utahensis	Halorhabdus utahensis DSM 12940	Archaea;Euryarchaeota;Stenosarchaea group	DSM 12940	SAMN00002611	PRJNA29305	Complete	3.1168	62.9	chromosome:NC_013158.1/CP001687.1		1	2971	2009-08-27T00:00:00Z	ftp://ftp.ncbi.nlm.nih.gov/genomes/all/GCA/000/023/945/GCA_000023945.1_ASM2394v1	ftp://ftp.ncbi.nlm.nih.gov/genomes/all/GCF/000/023/945/GCF_000023945.1_ASM2394v1
GCA_023028225.1	d__Archaea;p__Halobacteriota;c__Halobacteria;o__Halobacteriales;f__Haloarculaceae;g__Halorientalis;s__Halorientalis litorea	Halorientalis sp. ZY14	Archaea;Euryarchaeota;Stenosarchaea group	ZY14	SAMN27190819	PRJNA822515	Complete	3.21408	65.3158	chromosome:NZ_CP095482.1/CP095482.1; plasmid unnamed1:NZ_CP095483.1/CP095483.1; plasmid unnamed2:NZ_CP095484.1/CP095484.1; plasmid unnamed3:NZ_CP095485.1/CP095485.1; plasmid unnamed4:NZ_CP095486.1/CP095486.1		5	3262	2022-04-18T00:00:00Z	ftp://ftp.ncbi.nlm.nih.gov/genomes/all/GCA/023/028/225/GCA_023028225.1_ASM2302822v1	ftp://ftp.ncbi.nlm.nih.gov/genomes/all/GCF/023/028/225/GCF_023028225.1_ASM2302822v1
GCA_023028345.1	d__Archaea;p__Halobacteriota;c__Halobacteria;o__Halobacteriales;f__Haloarculaceae;g__Halorientalis;s__Halorientalis marina	Halorientalis sp. GDY88	Archaea;Euryarchaeota;Stenosarchaea group	GDY88	SAMN27190925	PRJNA822520	Complete	4.75414	65.3756	chromosome:NZ_CP095487.1/CP095487.1; plasmid unnamed1:NZ_CP095488.1/CP095488.1; plasmid unnamed2:NZ_CP095489.1/CP095489.1; plasmid unnamed3:NZ_CP095490.1/CP095490.1		4	4661	2022-04-18T00:00:00Z	ftp://ftp.ncbi.nlm.nih.gov/genomes/all/GCA/023/028/345/GCA_023028345.1_ASM2302834v1	ftp://ftp.ncbi.nlm.nih.gov/genomes/all/GCF/023/028/345/GCF_023028345.1_ASM2302834v1
GCA_004118325.1	d__Archaea;p__Halobacteriota;c__Halobacteria;o__Halobacteriales;f__Haloarculaceae;g__Halorientalis;s__Halorientalis pallida	Halorientalis pallida	Archaea;Euryarchaeota;Stenosarchaea group	F13-25	SAMN10247356	PRJNA497075	Scaffold	4.08767	65.7		RDFA01	23	4113	2019-01-29T00:00:00Z	ftp://ftp.ncbi.nlm.nih.gov/genomes/all/GCA/004/118/325/GCA_004118325.1_ASM411832v1	ftp://ftp.ncbi.nlm.nih.gov/genomes/all/GCF/004/118/325/GCF_004118325.1_ASM411832v1
GCA_900110215.1	d__Archaea;p__Halobacteriota;c__Halobacteria;o__Halobacteriales;f__Haloarculaceae;g__Halorientalis;s__Halorientalis persica	Halorientalis persicus	Archaea;Euryarchaeota;Stenosarchaea group	IBRC-M 10043	SAMN05216388	PRJEB16919	Scaffold	4.86976	63.5		FOCX01	121	4925	2016-10-29T00:00:00Z	ftp://ftp.ncbi.nlm.nih.gov/genomes/all/GCA/900/110/215/GCA_900110215.1_IMG-taxon_2654588107_annotated_assembly	ftp://ftp.ncbi.nlm.nih.gov/genomes/all/GCF/900/110/215/GCF_900110215.1_IMG-taxon_2654588107_annotated_assembly
GCA_900102305.1	d__Archaea;p__Halobacteriota;c__Halobacteria;o__Halobacteriales;f__Haloarculaceae;g__Halorientalis;s__Halorientalis regularis	Halorientalis regularis	Archaea;Euryarchaeota;Stenosarchaea group	IBRC-M 10760	SAMN05216218	PRJEB15830	Scaffold	4.0322	65		FNBK01	55	4062	2016-10-20T00:00:00Z	ftp://ftp.ncbi.nlm.nih.gov/genomes/all/GCA/900/102/305/GCA_900102305.1_IMG-taxon_2651870125_annotated_assembly	ftp://ftp.ncbi.nlm.nih.gov/genomes/all/GCF/900/102/305/GCF_900102305.1_IMG-taxon_2651870125_annotated_assembly
GCA_001989615.1	d__Archaea;p__Halobacteriota;c__Halobacteria;o__Halobacteriales;f__Haloarculaceae;g__Halorientalis;s__Halorientalis sp001989615	Halorientalis sp. IM1011	Archaea;Euryarchaeota;Stenosarchaea group	IM1011	SAMN06205239	PRJNA360226	Complete	3.77899	65.6229	chromosome:NZ_CP019067.1/CP019067.1; plasmid pHOS100:NZ_CP019069.1/CP019069.1; plasmid pHOS300:NZ_CP019068.1/CP019068.1		3	3839	2017-02-07T00:00:00Z	ftp://ftp.ncbi.nlm.nih.gov/genomes/all/GCA/001/989/615/GCA_001989615.1_ASM198961v1	ftp://ftp.ncbi.nlm.nih.gov/genomes/all/GCF/001/989/615/GCF_001989615.1_ASM198961v1
GCA_009663395.1	d__Archaea;p__Halobacteriota;c__Halobacteria;o__Halobacteriales;f__Haloarculaceae;g__Halosegnis;s__Halosegnis longus	Halosegnis longus	Archaea;Euryarchaeota;Stenosarchaea group	F12-1	SAMN09370565	PRJNA474704	Scaffold	2.76822	65.1		QKNW01	3	2926	2019-11-14T00:00:00Z	ftp://ftp.ncbi.nlm.nih.gov/genomes/all/GCA/009/663/395/GCA_009663395.1_ASM966339v1	ftp://ftp.ncbi.nlm.nih.gov/genomes/all/GCF/009/663/395/GCF_009663395.1_ASM966339v1
GCA_009184545.1	d__Archaea;p__Halobacteriota;c__Halobacteria;o__Halobacteriales;f__Haloarculaceae;g__Halosegnis;s__Halosegnis rubeus	Halosegnis rubeus	Archaea;Euryarchaeota;Stenosarchaea group	F17-44	SAMN09291540	PRJNA474095	Scaffold	2.6606	64.3		QJOW01	12	2751	2019-10-19T00:00:00Z	ftp://ftp.ncbi.nlm.nih.gov/genomes/all/GCA/009/184/545/GCA_009184545.1_ASM918454v1	ftp://ftp.ncbi.nlm.nih.gov/genomes/all/GCF/009/184/545/GCF_009184545.1_ASM918454v1
GCA_009184575.1	d__Archaea;p__Halobacteriota;c__Halobacteria;o__Halobacteriales;f__Haloarculaceae;g__Halosegnis;s__Halosegnis rubeus	Halosegnis rubeus	Archaea;Euryarchaeota;Stenosarchaea group	F18-79	SAMN09371719	PRJNA474728	Scaffold	2.42211	64.7		QKKZ01	10	2575	2019-10-19T00:00:00Z	ftp://ftp.ncbi.nlm.nih.gov/genomes/all/GCA/009/184/575/GCA_009184575.1_ASM918457v1	ftp://ftp.ncbi.nlm.nih.gov/genomes/all/GCF/009/184/575/GCF_009184575.1_ASM918457v1
GCA_003021175.1	d__Archaea;p__Halobacteriota;c__Halobacteria;o__Halobacteriales;f__Haloarculaceae;g__Halosegnis;s__Halosegnis sp003021175	Halobacteriales archaeon QH_7_66_36	Archaea;Euryarchaeota;Stenosarchaea group	QH_7_66_36	SAMN06020760	PRJNA351262	Scaffold	2.60566	66.7		PXQV01	18	2551	2018-03-27T00:00:00Z	ftp://ftp.ncbi.nlm.nih.gov/genomes/all/GCA/003/021/175/GCA_003021175.1_ASM302117v1
GCA_003021785.1	d__Archaea;p__Halobacteriota;c__Halobacteria;o__Halobacteriales;f__Haloarculaceae;g__Halosegnis;s__Halosegnis sp003021785	Halobacteriales archaeon QH_7_65_31	Archaea;Euryarchaeota;Stenosarchaea group	QH_7_65_31	SAMN06020759	PRJNA351262	Scaffold	2.24925	65.1		PXQU01	16	2326	2018-03-27T00:00:00Z	ftp://ftp.ncbi.nlm.nih.gov/genomes/all/GCA/003/021/785/GCA_003021785.1_ASM302178v1
GCA_003022765.1	d__Archaea;p__Halobacteriota;c__Halobacteria;o__Halobacteriales;f__Haloarculaceae;g__Halosegnis;s__Halosegnis sp003021785	Halobacteriales archaeon SW_8_65_20	Archaea;Euryarchaeota;Stenosarchaea group	SW_8_65_20	SAMN06020808	PRJNA351262	Scaffold	2.21298	64.9		PXSR01	24	2202	2018-03-27T00:00:00Z	ftp://ftp.ncbi.nlm.nih.gov/genomes/all/GCA/003/022/765/GCA_003022765.1_ASM302276v1
GCA_003023215.1	d__Archaea;p__Halobacteriota;c__Halobacteria;o__Halobacteriales;f__Haloarculaceae;g__Halosegnis;s__Halosegnis sp003021785	Halobacteriales archaeon SW_6_65_46	Archaea;Euryarchaeota;Stenosarchaea group	SW_6_65_46	SAMN06020804	PRJNA351262	Scaffold	1.92276	65.3		PXSN01	12	1977	2018-03-27T00:00:00Z	ftp://ftp.ncbi.nlm.nih.gov/genomes/all/GCA/003/023/215/GCA_003023215.1_ASM302321v1
GCA_003023185.1	d__Archaea;p__Halobacteriota;c__Halobacteria;o__Halobacteriales;f__Haloarculaceae;g__Halosegnis;s__Halosegnis sp003023185	Halobacteriales archaeon QS_9_67_17	Archaea;Euryarchaeota;Stenosarchaea group	QS_9_67_17	SAMN06020792	PRJNA351262	Scaffold	2.01752	67		PXSB01	102	2026	2018-03-27T00:00:00Z	ftp://ftp.ncbi.nlm.nih.gov/genomes/all/GCA/003/023/185/GCA_003023185.1_ASM302318v1
GCA_004698125.1	d__Archaea;p__Halobacteriota;c__Halobacteria;o__Halobacteriales;f__Haloarculaceae;g__Halosimplex;s__Halosimplex halophilum	Halosimplex halophilum	Archaea;Euryarchaeota;Stenosarchaea group	TH32	SAMN11242085	PRJNA528688	Scaffold	4.46737	70		SRHV01	7	4314	2019-04-08T00:00:00Z	ftp://ftp.ncbi.nlm.nih.gov/genomes/all/GCA/004/698/125/GCA_004698125.1_ASM469812v1	ftp://ftp.ncbi.nlm.nih.gov/genomes/all/GCF/004/698/125/GCF_004698125.1_ASM469812v1
GCA_016065055.1	d__Archaea;p__Halobacteriota;c__Halobacteria;o__Halobacteriales;f__Haloarculaceae;g__Halosimplex;s__Halosimplex litoreum	Halosimplex litoreum	Archaea;Euryarchaeota;Stenosarchaea group	YGH94	SAMN17013084	PRJNA682869	Complete	4.15805	68.5	chromosome:NZ_CP065856.1/CP065856.1		1	4018	2020-12-15T00:00:00Z	ftp://ftp.ncbi.nlm.nih.gov/genomes/all/GCA/016/065/055/GCA_016065055.1_ASM1606505v1	ftp://ftp.ncbi.nlm.nih.gov/genomes/all/GCF/016/065/055/GCF_016065055.1_ASM1606505v1
GCA_013415905.1	d__Archaea;p__Halobacteriota;c__Halobacteria;o__Halobacteriales;f__Haloarculaceae;g__Halosimplex;s__Halosimplex pelagicum	Halosimplex pelagicum	Archaea;Euryarchaeota;Stenosarchaea group	R2	SAMN15472364	PRJNA644747	Complete	5.19903	67.1	chromosome:NZ_CP058909.1/CP058909.1		1	5059	2020-07-15T00:00:00Z	ftp://ftp.ncbi.nlm.nih.gov/genomes/all/GCA/013/415/905/GCA_013415905.1_ASM1341590v1	ftp://ftp.ncbi.nlm.nih.gov/genomes/all/GCF/013/415/905/GCF_013415905.1_ASM1341590v1
GCA_013415885.1	d__Archaea;p__Halobacteriota;c__Halobacteria;o__Halobacteriales;f__Haloarculaceae;g__Halosimplex;s__Halosimplex rubrum	Halosimplex rubrum	Archaea;Euryarchaeota;Stenosarchaea group	R27	SAMN15472373	PRJNA644749	Complete	4.48015	67.8	chromosome:NZ_CP058910.1/CP058910.1		1	4341	2020-07-15T00:00:00Z	ftp://ftp.ncbi.nlm.nih.gov/genomes/all/GCA/013/415/885/GCA_013415885.1_ASM1341588v1	ftp://ftp.ncbi.nlm.nih.gov/genomes/all/GCF/013/415/885/GCF_013415885.1_ASM1341588v1
GCA_003022045.1	d__Archaea;p__Halobacteriota;c__Halobacteria;o__Halobacteriales;f__Haloarculaceae;g__Halosimplex;s__Halosimplex sp003023165	Halobacteriales archaeon QH_8_67_27	Archaea;Euryarchaeota;Stenosarchaea group	QH_8_67_27	SAMN06020767	PRJNA351262	Scaffold	2.17807	67.1		PXRC01	235	2087	2018-03-27T00:00:00Z	ftp://ftp.ncbi.nlm.nih.gov/genomes/all/GCA/003/022/045/GCA_003022045.1_ASM302204v1
GCA_003023165.1	d__Archaea;p__Halobacteriota;c__Halobacteria;o__Halobacteriales;f__Haloarculaceae;g__Halosimplex;s__Halosimplex sp003023165	Halobacteriales archaeon QS_9_67_15	Archaea;Euryarchaeota;Stenosarchaea group	QS_9_67_15	SAMN06020794	PRJNA351262	Scaffold	2.34856	67		PXSD01	191	2248	2018-03-27T00:00:00Z	ftp://ftp.ncbi.nlm.nih.gov/genomes/all/GCA/003/023/165/GCA_003023165.1_ASM302316v1
GCA_000415945.1	d__Archaea;p__Halobacteriota;c__Halobacteria;o__Halobacteriales;f__Haloarculaceae;g__Halovenus;s__	halophilic archaeon J07HX5	Archaea;Euryarchaeota;Stenosarchaea group		SAMN01940911	PRJNA176231	Scaffold	2.04094	59.2		ARPW01	1	2128	2013-06-26T00:00:00Z	ftp://ftp.ncbi.nlm.nih.gov/genomes/all/GCA/000/415/945/GCA_000415945.1_HX64_HX5_0315125.1	ftp://ftp.ncbi.nlm.nih.gov/genomes/all/GCF/000/415/945/GCF_000415945.1_HX64_HX5_0315125.1
GCA_900100385.1	d__Archaea;p__Halobacteriota;c__Halobacteria;o__Halobacteriales;f__Haloarculaceae;g__Halovenus;s__Halovenus aranensis	Halovenus aranensis	Archaea;Euryarchaeota;Stenosarchaea group	IBRC-M10015	SAMN05216226	PRJEB16002	Scaffold	3.28712	61.1		FNFC01	56	3227	2016-10-20T00:00:00Z	ftp://ftp.ncbi.nlm.nih.gov/genomes/all/GCA/900/100/385/GCA_900100385.1_IMG-taxon_2651870124_annotated_assembly	ftp://ftp.ncbi.nlm.nih.gov/genomes/all/GCF/900/100/385/GCF_900100385.1_IMG-taxon_2651870124_annotated_assembly
GCA_000416085.1	d__Archaea;p__Halobacteriota;c__Halobacteria;o__Halobacteriales;f__Haloarculaceae;g__Halovenus;s__Halovenus sp000416085	halophilic archaeon J07HX64	Archaea;Euryarchaeota;Stenosarchaea group		SAMN01940911	PRJNA70851	Scaffold	2.98294	62.8		AGCY01	1	3026	2013-06-26T00:00:00Z	ftp://ftp.ncbi.nlm.nih.gov/genomes/all/GCA/000/416/085/GCA_000416085.1_J07ABselected	ftp://ftp.ncbi.nlm.nih.gov/genomes/all/GCF/000/416/085/GCF_000416085.1_J07ABselected
GCA_003021015.1	d__Archaea;p__Halobacteriota;c__Halobacteria;o__Halobacteriales;f__Haloarculaceae;g__Halovenus;s__Halovenus sp003021015	Halobacteriales archaeon QS_4_66_20	Archaea;Euryarchaeota;Stenosarchaea group	QS_4_66_20	SAMN06020775	PRJNA351262	Scaffold	2.89124	65.8		PXRK01	86	2669	2018-03-27T00:00:00Z	ftp://ftp.ncbi.nlm.nih.gov/genomes/all/GCA/003/021/015/GCA_003021015.1_ASM302101v1
GCA_003023415.1	d__Archaea;p__Halobacteriota;c__Halobacteria;o__Halobacteriales;f__Haloarculaceae;g__Halovenus;s__Halovenus sp003021015	Halobacteriales archaeon SW_8_66_22	Archaea;Euryarchaeota;Stenosarchaea group	SW_8_66_22	SAMN06020809	PRJNA351262	Scaffold	2.23095	65.7		PXSS01	149	2022	2018-03-27T00:00:00Z	ftp://ftp.ncbi.nlm.nih.gov/genomes/all/GCA/003/023/415/GCA_003023415.1_ASM302341v1
GCA_003021285.1	d__Archaea;p__Halobacteriota;c__Halobacteria;o__Halobacteriales;f__Haloarculaceae;g__Halovenus;s__Halovenus sp003021285	Halobacteriales archaeon QH_2_65_14	Archaea;Euryarchaeota;Stenosarchaea group	QH_2_65_14	SAMN06020753	PRJNA351262	Scaffold	1.96497	64.6		PXQO01	113	1767	2018-03-27T00:00:00Z	ftp://ftp.ncbi.nlm.nih.gov/genomes/all/GCA/003/021/285/GCA_003021285.1_ASM302128v1
GCA_003021335.1	d__Archaea;p__Halobacteriota;c__Halobacteria;o__Halobacteriales;f__Haloarculaceae;g__Halovenus;s__Halovenus sp003021335	Halobacteriales archaeon QH_10_67_13	Archaea;Euryarchaeota;Stenosarchaea group	QH_10_67_13	SAMN06020750	PRJNA351262	Scaffold	1.48771	67.1		PXQL01	116	1451	2018-03-27T00:00:00Z	ftp://ftp.ncbi.nlm.nih.gov/genomes/all/GCA/003/021/335/GCA_003021335.1_ASM302133v1
GCA_003022085.1	d__Archaea;p__Halobacteriota;c__Halobacteria;o__Halobacteriales;f__Haloarculaceae;g__Halovenus;s__Halovenus sp003022085	Halobacteriales archaeon QH_10_65_19	Archaea;Euryarchaeota;Stenosarchaea group	QH_10_65_19	SAMN06020749	PRJNA351262	Scaffold	1.55287	65.5		PXQK01	188	1440	2018-03-27T00:00:00Z	ftp://ftp.ncbi.nlm.nih.gov/genomes/all/GCA/003/022/085/GCA_003022085.1_ASM302208v1
GCA_003022725.1	d__Archaea;p__Halobacteriota;c__Halobacteria;o__Halobacteriales;f__Haloarculaceae;g__Halovenus;s__Halovenus sp003022725	Halobacteriales archaeon SW_7_65_23	Archaea;Euryarchaeota;Stenosarchaea group	SW_7_65_23	SAMN06020807	PRJNA351262	Scaffold	2.63122	65.3		PXSQ01	115	2378	2018-03-27T00:00:00Z	ftp://ftp.ncbi.nlm.nih.gov/genomes/all/GCA/003/022/725/GCA_003022725.1_ASM302272v1
GCA_003021165.1	d__Archaea;p__Halobacteriota;c__Halobacteria;o__Halobacteriales;f__Haloarculaceae;g__Halovenus;s__Halovenus sp003022845	Halobacteriales archaeon QH_7_66_37	Archaea;Euryarchaeota;Stenosarchaea group	QH_7_66_37	SAMN06020761	PRJNA351262	Scaffold	1.71137	66.6		PXQW01	269	1629	2018-03-27T00:00:00Z	ftp://ftp.ncbi.nlm.nih.gov/genomes/all/GCA/003/021/165/GCA_003021165.1_ASM302116v1
GCA_003021205.1	d__Archaea;p__Halobacteriota;c__Halobacteria;o__Halobacteriales;f__Haloarculaceae;g__Halovenus;s__Halovenus sp003022845	Halobacteriales archaeon QH_6_66_25	Archaea;Euryarchaeota;Stenosarchaea group	QH_6_66_25	SAMN06020757	PRJNA351262	Scaffold	1.5127	66.7		PXQS01	196	1450	2018-03-27T00:00:00Z	ftp://ftp.ncbi.nlm.nih.gov/genomes/all/GCA/003/021/205/GCA_003021205.1_ASM302120v1
GCA_003021245.1	d__Archaea;p__Halobacteriota;c__Halobacteria;o__Halobacteriales;f__Haloarculaceae;g__Halovenus;s__Halovenus sp003022845	Halobacteriales archaeon QH_2_66_30	Archaea;Euryarchaeota;Stenosarchaea group	QH_2_66_30	SAMN06020754	PRJNA351262	Scaffold	1.48821	66.3		PXQP01	208	1445	2018-03-27T00:00:00Z	ftp://ftp.ncbi.nlm.nih.gov/genomes/all/GCA/003/021/245/GCA_003021245.1_ASM302124v1
GCA_003022845.1	d__Archaea;p__Halobacteriota;c__Halobacteria;o__Halobacteriales;f__Haloarculaceae;g__Halovenus;s__Halovenus sp003022845	Halobacteriales archaeon SW_10_66_29	Archaea;Euryarchaeota;Stenosarchaea group	SW_10_66_29	SAMN06020796	PRJNA351262	Scaffold	2.28466	65.9		PXSF01	170	2060	2018-03-27T00:00:00Z	ftp://ftp.ncbi.nlm.nih.gov/genomes/all/GCA/003/022/845/GCA_003022845.1_ASM302284v1
GCA_004015825.1	d__Archaea;p__Halobacteriota;c__Halobacteria;o__Halobacteriales;f__Haloarculaceae;g__Halovenus;s__Halovenus sp004015825	Halobacteriaceae archaeon SHR40	Archaea;Euryarchaeota;Stenosarchaea group	SHR40	SAMN10691328	PRJNA513008	Scaffold	3.75751	59		SAYS01	57	0	2019-01-14T00:00:00Z	ftp://ftp.ncbi.nlm.nih.gov/genomes/all/GCA/004/015/825/GCA_004015825.1_ASM401582v1	ftp://ftp.ncbi.nlm.nih.gov/genomes/all/GCF/004/015/825/GCF_004015825.1_ASM401582v1
GCA_003023455.1	d__Archaea;p__Halobacteriota;c__Halobacteria;o__Halobacteriales;f__Haloarculaceae;g__Natronomonas;s__	Halobacteriales archaeon SW_12_69_24	Archaea;Euryarchaeota;Stenosarchaea group	SW_12_69_24	SAMN06020799	PRJNA351262	Scaffold	1.25891	69		PXSI01	193	1184	2018-03-27T00:00:00Z	ftp://ftp.ncbi.nlm.nih.gov/genomes/all/GCA/003/023/455/GCA_003023455.1_ASM302345v1
GCA_003023575.1	d__Archaea;p__Halobacteriota;c__Halobacteria;o__Halobacteriales;f__Haloarculaceae;g__Natronomonas;s__	Halobacteriales archaeon QS_7_69_60	Archaea;Euryarchaeota;Stenosarchaea group	QS_7_69_60	SAMN06020787	PRJNA351262	Scaffold	1.3408	69		PXRW01	220	1303	2018-03-27T00:00:00Z	ftp://ftp.ncbi.nlm.nih.gov/genomes/all/GCA/003/023/575/GCA_003023575.1_ASM302357v1
GCA_013391085.1	d__Archaea;p__Halobacteriota;c__Halobacteria;o__Halobacteriales;f__Haloarculaceae;g__Natronomonas;s__Natronomonas halophila	Natronomonas halophila	Archaea;Euryarchaeota;Stenosarchaea group	C90	SAMN15354823	PRJNA641283	Complete	3.21168	64.4	chromosome:NZ_CP058334.1/CP058334.1		1	3352	2020-07-07T00:00:00Z	ftp://ftp.ncbi.nlm.nih.gov/genomes/all/GCA/013/391/085/GCA_013391085.1_ASM1339108v1	ftp://ftp.ncbi.nlm.nih.gov/genomes/all/GCF/013/391/085/GCF_013391085.1_ASM1339108v1
GCA_000026045.1	d__Archaea;p__Halobacteriota;c__Halobacteria;o__Halobacteriales;f__Haloarculaceae;g__Natronomonas;s__Natronomonas pharaonis	Natronomonas pharaonis DSM 2160	Archaea;Euryarchaeota;Stenosarchaea group	Gabara	SAMEA3138222	PRJNA15742	Complete	2.7497	63.0807	chromosome:NC_007426.1/CR936257.1; plasmid PL23:NC_007428.1/CR936259.1; plasmid PL131:NC_007427.1/CR936258.1		3	2789	2005-09-28T00:00:00Z	ftp://ftp.ncbi.nlm.nih.gov/genomes/all/GCA/000/026/045/GCA_000026045.1_ASM2604v1	ftp://ftp.ncbi.nlm.nih.gov/genomes/all/GCF/000/026/045/GCF_000026045.1_ASM2604v1
GCA_013391105.1	d__Archaea;p__Halobacteriota;c__Halobacteria;o__Halobacteriales;f__Haloarculaceae;g__Natronomonas;s__Natronomonas salina	Natronomonas salina	Archaea;Euryarchaeota;Stenosarchaea group	YPL13	SAMN15354321	PRJNA641280	Complete	3.74657	67.5	chromosome:NZ_CP058335.1/CP058335.1		1	3834	2020-07-07T00:00:00Z	ftp://ftp.ncbi.nlm.nih.gov/genomes/all/GCA/013/391/105/GCA_013391105.1_ASM1339110v1	ftp://ftp.ncbi.nlm.nih.gov/genomes/all/GCF/013/391/105/GCF_013391105.1_ASM1339110v1
GCA_003020965.1	d__Archaea;p__Halobacteriota;c__Halobacteria;o__Halobacteriales;f__Haloarculaceae;g__Natronomonas;s__Natronomonas sp003020965	Halobacteriales archaeon QS_4_69_225	Archaea;Euryarchaeota;Stenosarchaea group	QS_4_69_225	SAMN06020776	PRJNA351262	Scaffold	2.95193	69.1		PXRL01	28	2741	2018-03-27T00:00:00Z	ftp://ftp.ncbi.nlm.nih.gov/genomes/all/GCA/003/020/965/GCA_003020965.1_ASM302096v1
GCA_003021005.1	d__Archaea;p__Halobacteriota;c__Halobacteria;o__Halobacteriales;f__Haloarculaceae;g__Natronomonas;s__Natronomonas sp003021005	Halobacteriales archaeon QS_1_69_70	Archaea;Euryarchaeota;Stenosarchaea group	QS_1_69_70	SAMN06020773	PRJNA351262	Scaffold	2.44905	68.7		PXRI01	44	2230	2018-03-27T00:00:00Z	ftp://ftp.ncbi.nlm.nih.gov/genomes/all/GCA/003/021/005/GCA_003021005.1_ASM302100v1
GCA_003021325.1	d__Archaea;p__Halobacteriota;c__Halobacteria;o__Halobacteriales;f__Haloarculaceae;g__Natronomonas;s__Natronomonas sp003021325	Halobacteriales archaeon QH_10_70_21	Archaea;Euryarchaeota;Stenosarchaea group	QH_10_70_21	SAMN06020751	PRJNA351262	Scaffold	1.88302	69.7		PXQM01	204	1957	2018-03-27T00:00:00Z	ftp://ftp.ncbi.nlm.nih.gov/genomes/all/GCA/003/021/325/GCA_003021325.1_ASM302132v1
GCA_003021745.1	d__Archaea;p__Halobacteriota;c__Halobacteria;o__Halobacteriales;f__Haloarculaceae;g__Natronomonas;s__Natronomonas sp003021745	Halobacteriales archaeon QH_7_69_31	Archaea;Euryarchaeota;Stenosarchaea group	QH_7_69_31	SAMN06020763	PRJNA351262	Scaffold	2.20321	69.4		PXQY01	135	2060	2018-03-27T00:00:00Z	ftp://ftp.ncbi.nlm.nih.gov/genomes/all/GCA/003/021/745/GCA_003021745.1_ASM302174v1
GCA_003022815.1	d__Archaea;p__Halobacteriota;c__Halobacteria;o__Halobacteriales;f__Haloarculaceae;g__Natronomonas;s__Natronomonas sp003022815	Halobacteriales archaeon SW_5_68_122	Archaea;Euryarchaeota;Stenosarchaea group	SW_5_68_122	SAMN06020802	PRJNA351262	Scaffold	1.49726	68.1		PXSL01	137	1483	2018-03-27T00:00:00Z	ftp://ftp.ncbi.nlm.nih.gov/genomes/all/GCA/003/022/815/GCA_003022815.1_ASM302281v1
GCA_003021055.1	d__Archaea;p__Halobacteriota;c__Halobacteria;o__Halobacteriales;f__Haloarculaceae;g__Natronomonas;s__Natronomonas sp003022905	Halobacteriales archaeon QS_1_68_44	Archaea;Euryarchaeota;Stenosarchaea group	QS_1_68_44	SAMN06020772	PRJNA351262	Scaffold	1.23149	68.3		PXRH01	186	1264	2018-03-27T00:00:00Z	ftp://ftp.ncbi.nlm.nih.gov/genomes/all/GCA/003/021/055/GCA_003021055.1_ASM302105v1
GCA_003022905.1	d__Archaea;p__Halobacteriota;c__Halobacteria;o__Halobacteriales;f__Haloarculaceae;g__Natronomonas;s__Natronomonas sp003022905	Halobacteriales archaeon QS_9_68_42	Archaea;Euryarchaeota;Stenosarchaea group	QS_9_68_42	SAMN06020795	PRJNA351262	Scaffold	1.51752	68		PXSE01	150	1584	2018-03-27T00:00:00Z	ftp://ftp.ncbi.nlm.nih.gov/genomes/all/GCA/003/022/905/GCA_003022905.1_ASM302290v1
GCA_003022945.1	d__Archaea;p__Halobacteriota;c__Halobacteria;o__Halobacteriales;f__Haloarculaceae;g__Natronomonas;s__Natronomonas sp003022945	Halobacteriales archaeon QS_8_69_73	Archaea;Euryarchaeota;Stenosarchaea group	QS_8_69_73	SAMN06020790	PRJNA351262	Scaffold	2.63319	68.8		PXRZ01	79	2377	2018-03-27T00:00:00Z	ftp://ftp.ncbi.nlm.nih.gov/genomes/all/GCA/003/022/945/GCA_003022945.1_ASM302294v1
GCA_003023535.1	d__Archaea;p__Halobacteriota;c__Halobacteria;o__Halobacteriales;f__Haloarculaceae;g__Natronomonas;s__Natronomonas sp003023535	Halobacteriales archaeon QS_9_70_65	Archaea;Euryarchaeota;Stenosarchaea group	QS_9_70_65	SAMN06020793	PRJNA351262	Scaffold	1.8913	70.2		PXSC01	202	1759	2018-03-27T00:00:00Z	ftp://ftp.ncbi.nlm.nih.gov/genomes/all/GCA/003/023/535/GCA_003023535.1_ASM302353v1
GCA_013839515.1	d__Archaea;p__Halobacteriota;c__Halobacteria;o__Halobacteriales;f__Haloarculaceae;g__Natronomonas;s__Natronomonas sp013839515	Natronomonas sp. LN261	Archaea;Euryarchaeota;Stenosarchaea group	LN261	SAMN15462429	PRJNA644508	Scaffold	2.77952	64.5		JACDNQ01	30	2668	2020-07-28T00:00:00Z	ftp://ftp.ncbi.nlm.nih.gov/genomes/all/GCA/013/839/515/GCA_013839515.1_ASM1383951v1	ftp://ftp.ncbi.nlm.nih.gov/genomes/all/GCF/013/839/515/GCF_013839515.1_ASM1383951v1
GCA_024449025.1	d__Archaea;p__Halobacteriota;c__Halobacteria;o__Halobacteriales;f__Haloarculaceae;g__Natronomonas;s__Natronomonas sp024449025	Natronomonas sp. F2-12	Archaea;Euryarchaeota;Stenosarchaea group	F2-12	SAMN19487687	PRJNA734272	Scaffold	3.21435	62.7		JAHLKM01	82	3189	2022-07-26T00:00:00Z		ftp://ftp.ncbi.nlm.nih.gov/genomes/all/GCF/024/449/025/GCF_024449025.1_ASM2444902v1
GCA_003021105.1	d__Archaea;p__Halobacteriota;c__Halobacteria;o__Halobacteriales;f__Haloarculaceae;g__QS-1-68-17;s__QS-1-68-17 sp003021105	Halobacteriales archaeon QS_1_68_17	Archaea;Euryarchaeota;Stenosarchaea group	QS_1_68_17	SAMN06020771	PRJNA351262	Scaffold	2.06882	68.3		PXRG01	39	1996	2018-03-27T00:00:00Z	ftp://ftp.ncbi.nlm.nih.gov/genomes/all/GCA/003/021/105/GCA_003021105.1_ASM302110v1
GCA_003021655.1	d__Archaea;p__Halobacteriota;c__Halobacteria;o__Halobacteriales;f__Haloarculaceae;g__QS-4-69-31;s__QS-4-69-31 sp003021655	Halobacteriales archaeon QS_4_69_31	Archaea;Euryarchaeota;Stenosarchaea group	QS_4_69_31	SAMN06020780	PRJNA351262	Scaffold	2.73601	69		PXRP01	60	2546	2018-03-27T00:00:00Z	ftp://ftp.ncbi.nlm.nih.gov/genomes/all/GCA/003/021/655/GCA_003021655.1_ASM302165v1
GCA_003021115.1	d__Archaea;p__Halobacteriota;c__Halobacteria;o__Halobacteriales;f__Haloarculaceae;g__QS-5-68-33;s__	Halobacteriales archaeon QH_7_68_42	Archaea;Euryarchaeota;Stenosarchaea group	QH_7_68_42	SAMN06020762	PRJNA351262	Scaffold	1.38498	68.8		PXQX01	208	1316	2018-03-27T00:00:00Z	ftp://ftp.ncbi.nlm.nih.gov/genomes/all/GCA/003/021/115/GCA_003021115.1_ASM302111v1
GCA_003021365.1	d__Archaea;p__Halobacteriota;c__Halobacteria;o__Halobacteriales;f__Haloarculaceae;g__QS-5-68-33;s__	Halobacteriales archaeon QH_1_68_42	Archaea;Euryarchaeota;Stenosarchaea group	QH_1_68_42	SAMN06020748	PRJNA351262	Scaffold	2.1	68.5		PXQJ01	356	2046	2018-03-27T00:00:00Z	ftp://ftp.ncbi.nlm.nih.gov/genomes/all/GCA/003/021/365/GCA_003021365.1_ASM302136v1
GCA_003021795.1	d__Archaea;p__Halobacteriota;c__Halobacteria;o__Halobacteriales;f__Haloarculaceae;g__QS-5-68-33;s__	Halobacteriales archaeon QH_6_68_27	Archaea;Euryarchaeota;Stenosarchaea group	QH_6_68_27	SAMN06020758	PRJNA351262	Scaffold	1.7522	68.9		PXQT01	320	1667	2018-03-27T00:00:00Z	ftp://ftp.ncbi.nlm.nih.gov/genomes/all/GCA/003/021/795/GCA_003021795.1_ASM302179v1
GCA_003022055.1	d__Archaea;p__Halobacteriota;c__Halobacteria;o__Halobacteriales;f__Haloarculaceae;g__QS-5-68-33;s__	Halobacteriales archaeon QH_8_68_33	Archaea;Euryarchaeota;Stenosarchaea group	QH_8_68_33	SAMN06020766	PRJNA351262	Scaffold	1.62763	68.6		PXRB01	286	1641	2018-03-27T00:00:00Z	ftp://ftp.ncbi.nlm.nih.gov/genomes/all/GCA/003/022/055/GCA_003022055.1_ASM302205v1
GCA_003023785.1	d__Archaea;p__Halobacteriota;c__Halobacteria;o__Halobacteriales;f__Haloarculaceae;g__QS-5-68-33;s__QS-5-68-33 sp003023785	Halobacteriales archaeon QS_5_68_33	Archaea;Euryarchaeota;Stenosarchaea group	QS_5_68_33	SAMN06020783	PRJNA351262	Scaffold	2.41905	68.3		PXRS01	84	2268	2018-03-27T00:00:00Z	ftp://ftp.ncbi.nlm.nih.gov/genomes/all/GCA/003/023/785/GCA_003023785.1_ASM302378v1
GCA_003022005.1	d__Archaea;p__Halobacteriota;c__Halobacteria;o__Halobacteriales;f__Haloarculaceae;g__QS-5-70-15;s__QS-5-70-15 sp003022005	Halobacteriales archaeon QS_5_70_15	Archaea;Euryarchaeota;Stenosarchaea group	QS_5_70_15	SAMN06020781	PRJNA351262	Scaffold	3.21157	70.3		PXRQ01	123	2965	2018-03-27T00:00:00Z	ftp://ftp.ncbi.nlm.nih.gov/genomes/all/GCA/003/022/005/GCA_003022005.1_ASM302200v1
GCA_003022745.1	d__Archaea;p__Halobacteriota;c__Halobacteria;o__Halobacteriales;f__Haloarculaceae;g__SW-9-67-25;s__SW-9-67-25 sp003022745	Halobacteriales archaeon SW_9_67_25	Archaea;Euryarchaeota;Stenosarchaea group	SW_9_67_25	SAMN06020811	PRJNA351262	Scaffold	1.78633	67		PXSU01	178	1785	2018-03-27T00:00:00Z	ftp://ftp.ncbi.nlm.nih.gov/genomes/all/GCA/003/022/745/GCA_003022745.1_ASM302274v1
GCA_003023485.1	d__Archaea;p__Halobacteriota;c__Halobacteria;o__Halobacteriales;f__Haloarculaceae;g__SW-9-67-25;s__SW-9-67-25 sp003023485	Halobacteriales archaeon SW_10_68_16	Archaea;Euryarchaeota;Stenosarchaea group	SW_10_68_16	SAMN06020797	PRJNA351262	Scaffold	1.56597	67.8		PXSG01	121	1543	2018-03-27T00:00:00Z	ftp://ftp.ncbi.nlm.nih.gov/genomes/all/GCA/003/023/485/GCA_003023485.1_ASM302348v1
GCA_001305655.1	d__Archaea;p__Halobacteriota;c__Halobacteria;o__Halobacteriales;f__Halobacteriaceae;g__Halanaeroarchaeum;s__Halanaeroarchaeum sulfurireducens	Halanaeroarchaeum sulfurireducens	Archaea;Euryarchaeota;Stenosarchaea group	M27-SA2	SAMN03701450	PRJNA284332	Complete	2.2535	62.7699	chromosome:NZ_CP011564.1/CP011564.1; plasmid pM27-SA2-01:NZ_CP011565.1/CP011565.1		2	2237	2015-10-02T00:00:00Z	ftp://ftp.ncbi.nlm.nih.gov/genomes/all/GCA/001/305/655/GCA_001305655.1_ASM130565v1	ftp://ftp.ncbi.nlm.nih.gov/genomes/all/GCF/001/305/655/GCF_001305655.1_ASM130565v1
GCA_003721175.2	d__Archaea;p__Halobacteriota;c__Halobacteria;o__Halobacteriales;f__Halobacteriaceae;g__Halarchaeum;s__Halarchaeum grantii	Halarchaeum sp. CBA1220	Archaea;Euryarchaeota;Stenosarchaea group	CBA1220	SAMN10386251	PRJNA503943	Complete	3.17588	68.2262	chromosome:NZ_CP054707.1/CP054707.1; plasmid pCBA1220-01:NZ_CP054708.1/CP054708.1; plasmid pCBA1220-02:NZ_CP054709.1/CP054709.1; plasmid pCBA1220-03:NZ_CP054710.1/CP054710.1; plasmid pCBA1220-04:NZ_CP054711.1/CP054711.1; plasmid pCBA1220-05:NZ_CP054712.1/CP054712.1		6	3134	2020-06-11T00:00:00Z	ftp://ftp.ncbi.nlm.nih.gov/genomes/all/GCA/003/721/175/GCA_003721175.2_ASM372117v2	ftp://ftp.ncbi.nlm.nih.gov/genomes/all/GCF/003/721/175/GCF_003721175.2_ASM372117v2
GCA_014647455.2	d__Archaea;p__Halobacteriota;c__Halobacteria;o__Halobacteriales;f__Halobacteriaceae;g__Halarchaeum;s__Halarchaeum grantii	Halarchaeum grantii	Archaea;Euryarchaeota;Stenosarchaea group	JCM 19585	SAMD00245279	PRJDB10510	Scaffold	3.02467	67.9		BMPF01	13	3056	2020-09-11T00:00:00Z	ftp://ftp.ncbi.nlm.nih.gov/genomes/all/GCA/014/647/455/GCA_014647455.2_ASM1464745v2	ftp://ftp.ncbi.nlm.nih.gov/genomes/all/GCF/014/647/455/GCF_014647455.2_ASM1464745v2
GCA_001488575.1	d__Archaea;p__Halobacteriota;c__Halobacteria;o__Halobacteriales;f__Halobacteriaceae;g__Halobacterium;s__Halobacterium hubeiense	Halobacterium hubeiense	Archaea;Euryarchaeota;Stenosarchaea group	JI20-1	SAMEA3305703	PRJEB4726	Complete	3.13035	66.576	chromosome I:NZ_LN831302.1/LN831302.1; plasmid pSTJ001:NZ_LN831303.1/LN831303.1; plasmid pSTJ002:NZ_LN831304.1/LN831304.1; plasmid pSTJ003:NZ_LN831305.1/LN831305.1		4	3248	2015-12-17T00:00:00Z	ftp://ftp.ncbi.nlm.nih.gov/genomes/all/GCA/001/488/575/GCA_001488575.1_Halobacterium_hubeiense_JI20-1	ftp://ftp.ncbi.nlm.nih.gov/genomes/all/GCF/001/488/575/GCF_001488575.1_Halobacterium_hubeiense_JI20-1
GCA_900005775.1	d__Archaea;p__Halobacteriota;c__Halobacteria;o__Halobacteriales;f__Halobacteriaceae;g__Halobacterium;s__Halobacterium hubeiense	Halobacterium hubeiense	Archaea;Euryarchaeota;Stenosarchaea group	JI20-5	SAMEA3268808	PRJEB8631	Scaffold	3.23365	66.4		CEMR01	15	3305	2016-04-24T00:00:00Z	ftp://ftp.ncbi.nlm.nih.gov/genomes/all/GCA/900/005/775/GCA_900005775.1_ASM90000577v1	ftp://ftp.ncbi.nlm.nih.gov/genomes/all/GCF/900/005/775/GCF_900005775.1_ASM90000577v1
GCA_900003505.1	d__Archaea;p__Halobacteriota;c__Halobacteria;o__Halobacteriales;f__Halobacteriaceae;g__Halobacterium;s__Halobacterium hubeiense	Halobacterium hubeiense	Archaea;Euryarchaeota;Stenosarchaea group	JI20-3	SAMEA3268806	PRJEB8631	Scaffold	3.23578	66.4		CEMN01	16	3305	2016-04-24T00:00:00Z	ftp://ftp.ncbi.nlm.nih.gov/genomes/all/GCA/900/003/505/GCA_900003505.1_ASM90000350v1	ftp://ftp.ncbi.nlm.nih.gov/genomes/all/GCF/900/003/505/GCF_900003505.1_ASM90000350v1
GCA_900003575.1	d__Archaea;p__Halobacteriota;c__Halobacteria;o__Halobacteriales;f__Halobacteriaceae;g__Halobacterium;s__Halobacterium hubeiense	Halobacterium hubeiense	Archaea;Euryarchaeota;Stenosarchaea group	JI20-4	SAMEA3268807	PRJEB8631	Scaffold	3.23341	66.4		CEML01	18	3310	2016-04-24T00:00:00Z	ftp://ftp.ncbi.nlm.nih.gov/genomes/all/GCA/900/003/575/GCA_900003575.1_ASM90000357v1	ftp://ftp.ncbi.nlm.nih.gov/genomes/all/GCF/900/003/575/GCF_900003575.1_ASM90000357v1
GCA_900003565.1	d__Archaea;p__Halobacteriota;c__Halobacteria;o__Halobacteriales;f__Halobacteriaceae;g__Halobacterium;s__Halobacterium hubeiense	Halobacterium hubeiense	Archaea;Euryarchaeota;Stenosarchaea group	JI20-6	SAMEA3268809	PRJEB8631	Scaffold	3.23517	66.4		CEMP01	10	3301	2016-04-24T00:00:00Z	ftp://ftp.ncbi.nlm.nih.gov/genomes/all/GCA/900/003/565/GCA_900003565.1_ASM90000356v1	ftp://ftp.ncbi.nlm.nih.gov/genomes/all/GCF/900/003/565/GCF_900003565.1_ASM90000356v1
GCA_900003525.1	d__Archaea;p__Halobacteriota;c__Halobacteria;o__Halobacteriales;f__Halobacteriaceae;g__Halobacterium;s__Halobacterium hubeiense	Halobacterium hubeiense	Archaea;Euryarchaeota;Stenosarchaea group	JI20-7	SAMEA3268810	PRJEB8631	Scaffold	3.23531	66.4		CEMQ01	12	3302	2016-04-24T00:00:00Z	ftp://ftp.ncbi.nlm.nih.gov/genomes/all/GCA/900/003/525/GCA_900003525.1_ASM90000352v1	ftp://ftp.ncbi.nlm.nih.gov/genomes/all/GCF/900/003/525/GCF_900003525.1_ASM90000352v1
GCA_900003515.1	d__Archaea;p__Halobacteriota;c__Halobacteria;o__Halobacteriales;f__Halobacteriaceae;g__Halobacterium;s__Halobacterium hubeiense	Halobacterium hubeiense	Archaea;Euryarchaeota;Stenosarchaea group	JI20-2	SAMEA3268805	PRJEB8631	Scaffold	3.23748	66.4		CEMO01	10	3302	2016-04-24T00:00:00Z	ftp://ftp.ncbi.nlm.nih.gov/genomes/all/GCA/900/003/515/GCA_900003515.1_ASM90000351v1	ftp://ftp.ncbi.nlm.nih.gov/genomes/all/GCF/900/003/515/GCF_900003515.1_ASM90000351v1
GCA_900004275.1	d__Archaea;p__Halobacteriota;c__Halobacteria;o__Halobacteriales;f__Halobacteriaceae;g__Halobacterium;s__Halobacterium hubeiense	Halobacterium hubeiense	Archaea;Euryarchaeota;Stenosarchaea group	JI20-8	SAMEA3268811	PRJEB8631	Scaffold	3.23827	66.4		CEMZ01	11	3312	2016-04-24T00:00:00Z	ftp://ftp.ncbi.nlm.nih.gov/genomes/all/GCA/900/004/275/GCA_900004275.1_ASM90000427v1	ftp://ftp.ncbi.nlm.nih.gov/genomes/all/GCF/900/004/275/GCF_900004275.1_ASM90000427v1
GCA_021233415.1	d__Archaea;p__Halobacteriota;c__Halobacteria;o__Halobacteriales;f__Halobacteriaceae;g__Halobacterium;s__Halobacterium litoreum	Halobacterium litoreum	Archaea;Euryarchaeota;Stenosarchaea group	ZS-54-S2	SAMN23798363	PRJNA787373	Complete	2.709	68.603	chromosome:NZ_CP089466.1/CP089466.1; plasmid unnamed1:NZ_CP089467.1/CP089467.1		2	2900	2021-12-20T00:00:00Z	ftp://ftp.ncbi.nlm.nih.gov/genomes/all/GCA/021/233/415/GCA_021233415.1_ASM2123341v1	ftp://ftp.ncbi.nlm.nih.gov/genomes/all/GCF/021/233/415/GCF_021233415.1_ASM2123341v1
GCA_021233435.1	d__Archaea;p__Halobacteriota;c__Halobacteria;o__Halobacteriales;f__Halobacteriaceae;g__Halobacterium;s__Halobacterium noricense	Halobacterium noricense	Archaea;Euryarchaeota;Stenosarchaea group	JCM 15102	SAMN23798384	PRJNA787377	Complete	3.3168	64.7878	chromosome:NZ_CP089468.1/CP089468.1; plasmid unnamed1:NZ_CP089469.1/CP089469.1; plasmid unnamed2:NZ_CP089470.1/CP089470.1		3	3396	2021-12-20T00:00:00Z	ftp://ftp.ncbi.nlm.nih.gov/genomes/all/GCA/021/233/435/GCA_021233435.1_ASM2123343v1	ftp://ftp.ncbi.nlm.nih.gov/genomes/all/GCF/021/233/435/GCF_021233435.1_ASM2123343v1
GCA_004799605.1	d__Archaea;p__Halobacteriota;c__Halobacteria;o__Halobacteriales;f__Halobacteriaceae;g__Halobacterium;s__Halobacterium salinarum	Halobacterium salinarum	Archaea;Euryarchaeota;Stenosarchaea group	91-R6	SAMN11158145	PRJNA530823	Complete	2.42968	66.2551	chromosome:NZ_CP038631.1/CP038631.1; plasmid pHSAL1:NZ_CP038632.1/CP038632.1; plasmid pHSAL2:NZ_CP038633.1/CP038633.1		3	2467	2019-04-18T00:00:00Z	ftp://ftp.ncbi.nlm.nih.gov/genomes/all/GCA/004/799/605/GCA_004799605.1_ASM479960v1	ftp://ftp.ncbi.nlm.nih.gov/genomes/all/GCF/004/799/605/GCF_004799605.1_ASM479960v1
GCA_000006805.1	d__Archaea;p__Halobacteriota;c__Halobacteria;o__Halobacteriales;f__Halobacteriaceae;g__Halobacterium;s__Halobacterium salinarum	Halobacterium salinarum NRC-1	Archaea;Euryarchaeota;Stenosarchaea group	NRC-1; ATCC 700922	SAMN02604216	PRJNA412908	Complete	2.57101	65.9192	chromosome:NC_002607.1/AE004437.1; plasmid pNRC100:NC_001869.1/AF016485.1; plasmid pNRC200:NC_002608.1/AE004438.1		3	2641	2000-07-14T00:00:00Z	ftp://ftp.ncbi.nlm.nih.gov/genomes/all/GCA/000/006/805/GCA_000006805.1_ASM680v1	ftp://ftp.ncbi.nlm.nih.gov/genomes/all/GCF/000/006/805/GCF_000006805.1_ASM680v1
GCA_000069025.1	d__Archaea;p__Halobacteriota;c__Halobacteria;o__Halobacteriales;f__Halobacteriaceae;g__Halobacterium;s__Halobacterium salinarum	Halobacterium salinarum R1	Archaea;Euryarchaeota;Stenosarchaea group	DSM 671 = R1	SAMEA3138275	PRJNA106	Complete	2.66878	65.6986	chromosome:NC_010364.1/AM774415.1; plasmid PHS1:NC_010366.1/AM774416.1; plasmid PHS2:NC_010369.1/AM774417.1; plasmid PHS3:NC_010368.1/AM774418.1; plasmid PHS4:NC_010367.1/AM774419.1		5	2701	2008-02-12T00:00:00Z	ftp://ftp.ncbi.nlm.nih.gov/genomes/all/GCA/000/069/025/GCA_000069025.1_ASM6902v1	ftp://ftp.ncbi.nlm.nih.gov/genomes/all/GCF/000/069/025/GCF_000069025.1_ASM6902v1
GCA_020736485.1	d__Archaea;p__Halobacteriota;c__Halobacteria;o__Halobacteriales;f__Halobacteriaceae;g__Halobacterium;s__Halobacterium salinarum	Halobacterium sp. NRC-34001	Archaea;Euryarchaeota;Stenosarchaea group	NRC-34001	SAMN22513565	PRJNA412908	Complete	2.29104	66.9203	chromosome:NZ_CP085882.1/CP085882.1; plasmid pHcu_43:NZ_CP085884.1/CP085884.1; plasmid pHcu_235:NZ_CP085883.1/CP085883.1		3	2341	2021-11-03T00:00:00Z	ftp://ftp.ncbi.nlm.nih.gov/genomes/all/GCA/020/736/485/GCA_020736485.1_ASM2073648v1	ftp://ftp.ncbi.nlm.nih.gov/genomes/all/GCF/020/736/485/GCF_020736485.1_ASM2073648v1
GCA_016917835.3	d__Archaea;p__Halobacteriota;c__Halobacteria;o__Halobacteriales;f__Halobacteriaceae;g__Halobacterium;s__Halobacterium salinarum	Halobacterium sp. BOL4-2	Archaea;Euryarchaeota;Stenosarchaea group	BOL4-2	SAMN17798216	PRJNA412908	Complete	2.44737	66.3627	chromosome:NZ_CP070332.2/CP070332.2; plasmid pBOL4-2_105.9:NZ_CP070334.1/CP070334.1; plasmid pBOL4-2_2.1:NZ_CP070336.1/CP070336.1; plasmid pBOL4-2_299.7:NZ_CP070335.2/CP070335.2; plasmid pBOL4-2_49.8:NZ_CP070337.2/CP070337.2		5	2503	2021-02-22T00:00:00Z	ftp://ftp.ncbi.nlm.nih.gov/genomes/all/GCA/016/917/835/GCA_016917835.3_ASM1691783v3	ftp://ftp.ncbi.nlm.nih.gov/genomes/all/GCF/016/917/835/GCF_016917835.2_ASM1691783v3
GCA_016917855.1	d__Archaea;p__Halobacteriota;c__Halobacteria;o__Halobacteriales;f__Halobacteriaceae;g__Halobacterium;s__Halobacterium salinarum	Halobacterium sp. GSL-19	Archaea;Euryarchaeota;Stenosarchaea group	GSL-19	SAMN17888196	PRJNA412908	Complete	2.32622	66.7569	chromosome:NZ_CP070377.1/CP070377.1; plasmid pGSL19_284:NZ_CP070375.1/CP070375.1; plasmid pGSL19_54.9:NZ_CP070376.1/CP070376.1		3	2372	2021-02-22T00:00:00Z	ftp://ftp.ncbi.nlm.nih.gov/genomes/all/GCA/016/917/855/GCA_016917855.1_ASM1691785v1	ftp://ftp.ncbi.nlm.nih.gov/genomes/all/GCF/016/917/855/GCF_016917855.1_ASM1691785v1
GCA_021503995.1	d__Archaea;p__Halobacteriota;c__Halobacteria;o__Halobacteriales;f__Halobacteriaceae;g__Halobacterium;s__Halobacterium salinarum	Halobacterium salinarum	Archaea;Euryarchaeota;Stenosarchaea group	CBA1132	SAMN19225704	PRJNA730302	Scaffold	2.05978	65.5		JAHCLW01	557	2143	2022-01-18T00:00:00Z	ftp://ftp.ncbi.nlm.nih.gov/genomes/all/GCA/021/503/995/GCA_021503995.1_ASM2150399v1	ftp://ftp.ncbi.nlm.nih.gov/genomes/all/GCF/021/503/995/GCF_021503995.1_ASM2150399v1
GCA_000230955.3	d__Archaea;p__Halobacteriota;c__Halobacteria;o__Halobacteriales;f__Halobacteriaceae;g__Halobacterium;s__Halobacterium sp000230955	Halobacterium sp. DL1	Archaea;Euryarchaeota;Stenosarchaea group	DL1	SAMN02261380	PRJNA59739	Complete	3.16256	66.4422	chromosome:NZ_CP007060.1/CP007060.1; plasmid unnamed:NZ_CP007061.1/CP007061.1		2	3248	2014-01-13T00:00:00Z	ftp://ftp.ncbi.nlm.nih.gov/genomes/all/GCA/000/230/955/GCA_000230955.3_ASM23095v3	ftp://ftp.ncbi.nlm.nih.gov/genomes/all/GCF/000/230/955/GCF_000230955.2_ASM23095v3
GCA_021249345.1	d__Archaea;p__Halobacteriota;c__Halobacteria;o__Halobacteriales;f__Halobacteriaceae;g__Halobacterium;s__Halobacterium sp021249345	Halobacterium sp. Gai3-17	Archaea;Euryarchaeota;Stenosarchaea group	Gai3-17	SAMN23798262	PRJNA787363	Complete	3.11219	67.3	chromosome:NZ_CP089588.1/CP089588.1		1	3239	2021-12-21T00:00:00Z	ftp://ftp.ncbi.nlm.nih.gov/genomes/all/GCA/021/249/345/GCA_021249345.1_ASM2124934v1	ftp://ftp.ncbi.nlm.nih.gov/genomes/all/GCF/021/249/345/GCF_021249345.1_ASM2124934v1
GCA_021249405.1	d__Archaea;p__Halobacteriota;c__Halobacteria;o__Halobacteriales;f__Halobacteriaceae;g__Halobacterium;s__Halobacterium sp021249405	Halobacterium sp. XZYJT26	Archaea;Euryarchaeota;Stenosarchaea group	XZYJT26	SAMN23798265	PRJNA787367	Complete	2.82888	66.1755	chromosome:NZ_CP089593.1/CP089593.1; plasmid unnamed1:NZ_CP089594.1/CP089594.1; plasmid unnamed2:NZ_CP089595.1/CP089595.1; plasmid unnamed3:NZ_CP089596.1/CP089596.1		4	2856	2021-12-21T00:00:00Z	ftp://ftp.ncbi.nlm.nih.gov/genomes/all/GCA/021/249/405/GCA_021249405.1_ASM2124940v1	ftp://ftp.ncbi.nlm.nih.gov/genomes/all/GCF/021/249/405/GCF_021249405.1_ASM2124940v1
GCA_001886955.1	d__Archaea;p__Halobacteriota;c__Halobacteria;o__Halobacteriales;f__Halobacteriaceae;g__Halodesulfurarchaeum;s__Halodesulfurarchaeum formicicum	Halodesulfurarchaeum formicicum	Archaea;Euryarchaeota;Stenosarchaea group	HSR6	SAMN05363636	PRJNA328078	Complete	2.08595	63.6	chromosome:NZ_CP016804.1/CP016804.1		1	2120	2016-11-28T00:00:00Z	ftp://ftp.ncbi.nlm.nih.gov/genomes/all/GCA/001/886/955/GCA_001886955.1_ASM188695v1	ftp://ftp.ncbi.nlm.nih.gov/genomes/all/GCF/001/886/955/GCF_001886955.1_ASM188695v1
GCA_001767315.1	d__Archaea;p__Halobacteriota;c__Halobacteria;o__Halobacteriales;f__Halobacteriaceae;g__Halodesulfurarchaeum;s__Halodesulfurarchaeum formicicum	Halodesulfurarchaeum formicicum	Archaea;Euryarchaeota;Stenosarchaea group	HTSR1	SAMN05185403	PRJNA323694	Complete	1.97228	63.8	chromosome:NZ_CP016070.1/CP016070.1		1	2017	2016-10-18T00:00:00Z	ftp://ftp.ncbi.nlm.nih.gov/genomes/all/GCA/001/767/315/GCA_001767315.1_ASM176731v1	ftp://ftp.ncbi.nlm.nih.gov/genomes/all/GCF/001/767/315/GCF_001767315.1_ASM176731v1
GCA_020614395.1	d__Archaea;p__Halobacteriota;c__Halobacteria;o__Halobacteriales;f__Halobacteriaceae;g__Salarchaeum;s__Salarchaeum japonicum	Salarchaeum japonicum	Archaea;Euryarchaeota;Stenosarchaea group	JCM 16327	SAMN22374871	PRJNA772374	Complete	2.33928	67.4683	chromosome:NZ_CP085324.1/CP085324.1; plasmid unnamed1:NZ_CP085325.1/CP085325.1		2	2546	2021-10-26T00:00:00Z	ftp://ftp.ncbi.nlm.nih.gov/genomes/all/GCA/020/614/395/GCA_020614395.1_ASM2061439v1	ftp://ftp.ncbi.nlm.nih.gov/genomes/all/GCF/020/614/395/GCF_020614395.1_ASM2061439v1
GCA_007833275.1	d__Archaea;p__Halobacteriota;c__Halobacteria;o__Halobacteriales;f__Halobacteriaceae;g__Salarchaeum;s__Salarchaeum sp007833275	Salarchaeum sp. JOR-1	Archaea;Euryarchaeota;Stenosarchaea group	JOR-1	SAMN12388109	PRJNA412908	Complete	2.52337	66.1227	chromosome:NZ_CP042241.1/CP042241.1; plasmid pJOR178:NZ_CP042240.1/CP042240.1		2	2593	2019-08-05T00:00:00Z	ftp://ftp.ncbi.nlm.nih.gov/genomes/all/GCA/007/833/275/GCA_007833275.1_ASM783327v1	ftp://ftp.ncbi.nlm.nih.gov/genomes/all/GCF/007/833/275/GCF_007833275.1_ASM783327v1
GCA_003023525.1	d__Archaea;p__Halobacteriota;c__Halobacteria;o__Halobacteriales;f__Halococcaceae;g__Halococcus;s__	Halobacteriales archaeon QS_7_68_65	Archaea;Euryarchaeota;Stenosarchaea group	QS_7_68_65	SAMN06020786	PRJNA351262	Scaffold	1.16227	68.2		PXRV01	192	1114	2018-03-27T00:00:00Z	ftp://ftp.ncbi.nlm.nih.gov/genomes/all/GCA/003/023/525/GCA_003023525.1_ASM302352v1
GCA_022870485.1	d__Archaea;p__Halobacteriota;c__Halobacteria;o__Halobacteriales;f__Halococcaceae;g__Halococcus;s__Halococcus morrhuae	Halococcus dombrowskii	Archaea;Euryarchaeota;Stenosarchaea group	H4	SAMN27257334	PRJNA822675	Complete	3.96547	62.2129	chromosome:NZ_CP095005.1/CP095005.1; plasmid unnamed1:NZ_CP095006.1/CP095006.1; plasmid unnamed2:NZ_CP095007.1/CP095007.1; plasmid unnamed3:NZ_CP095008.1/CP095008.1; plasmid unnamed4:NZ_CP095009.1/CP095009.1; plasmid unnamed5:NZ_CP095010.1/CP095010.1		6	3841	2022-04-11T00:00:00Z	ftp://ftp.ncbi.nlm.nih.gov/genomes/all/GCA/022/870/485/GCA_022870485.1_ASM2287048v1	ftp://ftp.ncbi.nlm.nih.gov/genomes/all/GCF/022/870/485/GCF_022870485.1_ASM2287048v1
GCA_009900715.1	d__Archaea;p__Halobacteriota;c__Halobacteria;o__Halobacteriales;f__Halococcaceae;g__Halococcus;s__Halococcus salsus	Halococcus salsus	Archaea;Euryarchaeota;Stenosarchaea group	ZJ1	SAMN13783723	PRJNA600154	Scaffold	3.52198	64.7		JAAAJC01	30	3493	2020-01-17T00:00:00Z	ftp://ftp.ncbi.nlm.nih.gov/genomes/all/GCA/009/900/715/GCA_009900715.1_ASM990071v1	ftp://ftp.ncbi.nlm.nih.gov/genomes/all/GCF/009/900/715/GCF_009900715.1_ASM990071v1
GCA_003021045.1	d__Archaea;p__Halobacteriota;c__Halobacteria;o__Halobacteriales;f__Halococcaceae;g__Halococcus;s__Halococcus sp003021045	Halobacteriales archaeon QS_4_69_34	Archaea;Euryarchaeota;Stenosarchaea group	QS_4_69_34	SAMN06020778	PRJNA351262	Scaffold	2.57331	69.4		PXRN01	38	2276	2018-03-27T00:00:00Z	ftp://ftp.ncbi.nlm.nih.gov/genomes/all/GCA/003/021/045/GCA_003021045.1_ASM302104v1
GCA_003021235.1	d__Archaea;p__Halobacteriota;c__Halobacteria;o__Halobacteriales;f__Halococcaceae;g__Halococcus;s__Halococcus sp003021235	Halobacteriales archaeon QH_6_64_20	Archaea;Euryarchaeota;Stenosarchaea group	QH_6_64_20	SAMN06020756	PRJNA351262	Scaffold	3.60458	64.5		PXQR01	152	3326	2018-03-27T00:00:00Z	ftp://ftp.ncbi.nlm.nih.gov/genomes/all/GCA/003/021/235/GCA_003021235.1_ASM302123v1
GCA_003021705.1	d__Archaea;p__Halobacteriota;c__Halobacteria;o__Halobacteriales;f__Halococcaceae;g__Halococcus;s__Halococcus sp003021705	Halobacteriales archaeon QS_3_64_16	Archaea;Euryarchaeota;Stenosarchaea group	QS_3_64_16	SAMN06020774	PRJNA351262	Scaffold	2.83274	64		PXRJ01	70	2645	2018-03-27T00:00:00Z	ftp://ftp.ncbi.nlm.nih.gov/genomes/all/GCA/003/021/705/GCA_003021705.1_ASM302170v1
GCA_003021725.1	d__Archaea;p__Halobacteriota;c__Halobacteria;o__Halobacteriales;f__Halococcaceae;g__Halococcus;s__Halococcus sp003021725	Halobacteriales archaeon QH_8_64_26	Archaea;Euryarchaeota;Stenosarchaea group	QH_8_64_26	SAMN06020765	PRJNA351262	Scaffold	3.05316	64.8		PXRA01	116	2844	2018-03-27T00:00:00Z	ftp://ftp.ncbi.nlm.nih.gov/genomes/all/GCA/003/021/725/GCA_003021725.1_ASM302172v1
GCA_003021145.1	d__Archaea;p__Halobacteriota;c__Halobacteria;o__Halobacteriales;f__Halococcaceae;g__Halococcus;s__Halococcus sp003022685	Halobacteriales archaeon QH_9_66_26	Archaea;Euryarchaeota;Stenosarchaea group	QH_9_66_26	SAMN06020768	PRJNA351262	Scaffold	2.31943	66.6		PXRD01	155	2194	2018-03-27T00:00:00Z	ftp://ftp.ncbi.nlm.nih.gov/genomes/all/GCA/003/021/145/GCA_003021145.1_ASM302114v1
GCA_003022685.1	d__Archaea;p__Halobacteriota;c__Halobacteria;o__Halobacteriales;f__Halococcaceae;g__Halococcus;s__Halococcus sp003022685	Halobacteriales archaeon SW_9_67_24	Archaea;Euryarchaeota;Stenosarchaea group	SW_9_67_24	SAMN06020812	PRJNA351262	Scaffold	2.17279	66.8		PXSV01	199	2034	2018-03-27T00:00:00Z	ftp://ftp.ncbi.nlm.nih.gov/genomes/all/GCA/003/022/685/GCA_003022685.1_ASM302268v1
GCA_003023445.1	d__Archaea;p__Halobacteriota;c__Halobacteria;o__Halobacteriales;f__Halococcaceae;g__Halococcus;s__Halococcus sp003022685	Halobacteriales archaeon SW_12_67_38	Archaea;Euryarchaeota;Stenosarchaea group	SW_12_67_38	SAMN06020800	PRJNA351262	Scaffold	1.66329	66.9		PXSJ01	268	1613	2018-03-27T00:00:00Z	ftp://ftp.ncbi.nlm.nih.gov/genomes/all/GCA/003/023/445/GCA_003023445.1_ASM302344v1
GCA_003022925.1	d__Archaea;p__Halobacteriota;c__Halobacteria;o__Halobacteriales;f__Halococcaceae;g__Halococcus;s__Halococcus sp003022925	Halobacteriales archaeon QS_8_65_32	Archaea;Euryarchaeota;Stenosarchaea group	QS_8_65_32	SAMN06020789	PRJNA351262	Scaffold	3.27837	65.1		PXRY01	127	2999	2018-03-27T00:00:00Z	ftp://ftp.ncbi.nlm.nih.gov/genomes/all/GCA/003/022/925/GCA_003022925.1_ASM302292v1
GCA_002952775.1	d__Archaea;p__Halobacteriota;c__Halobacteria;o__Halobacteriales;f__Haloferacaceae;g__Halalkaliarchaeum;s__Halalkaliarchaeum desulfuricum	Halalkaliarchaeum desulfuricum	Archaea;Euryarchaeota;Stenosarchaea group	AArc-Sl	SAMN08093583	PRJNA419617	Complete	3.31312	63.1	chromosome:NZ_CP025066.1/CP025066.1		1	3207	2018-02-01T00:00:00Z	ftp://ftp.ncbi.nlm.nih.gov/genomes/all/GCA/002/952/775/GCA_002952775.1_ASM295277v1	ftp://ftp.ncbi.nlm.nih.gov/genomes/all/GCF/002/952/775/GCF_002952775.1_ASM295277v1
GCA_005543295.1	d__Archaea;p__Halobacteriota;c__Halobacteria;o__Halobacteriales;f__Haloferacaceae;g__Halalkalirubrum;s__Halalkalirubrum salinum	Halalkalirubrum salinum	Archaea;Euryarchaeota;Stenosarchaea group	N1521	SAMN11321757	PRJNA530670	Scaffold	3.41621	58.4		SRSG01	62	3329	2019-05-21T00:00:00Z	ftp://ftp.ncbi.nlm.nih.gov/genomes/all/GCA/005/543/295/GCA_005543295.1_ASM554329v1	ftp://ftp.ncbi.nlm.nih.gov/genomes/all/GCF/005/543/295/GCF_005543295.1_ASM554329v1
GCA_005239175.1	d__Archaea;p__Halobacteriota;c__Halobacteria;o__Halobacteriales;f__Haloferacaceae;g__Halalkalirubrum;s__Halalkalirubrum sp005239175	halophilic archaeon SHRA6	Archaea;Euryarchaeota;Stenosarchaea group	SHRA6	SAMN11180613	PRJNA528369	Scaffold	3.35967	59		SOPS01	5	0	2019-05-08T00:00:00Z	ftp://ftp.ncbi.nlm.nih.gov/genomes/all/GCA/005/239/175/GCA_005239175.1_ASM523917v1	ftp://ftp.ncbi.nlm.nih.gov/genomes/all/GCF/005/239/175/GCF_005239175.1_ASM523917v1
GCA_002844195.1	d__Archaea;p__Halobacteriota;c__Halobacteria;o__Halobacteriales;f__Haloferacaceae;g__Halegenticoccus;s__Halegenticoccus soli	Halegenticoccus soli	Archaea;Euryarchaeota;Stenosarchaea group	SYSU A9-0	SAMN07633033	PRJNA406866	Scaffold	4.6154	66.9		PEND01	15	4393	2017-12-15T00:00:00Z	ftp://ftp.ncbi.nlm.nih.gov/genomes/all/GCA/002/844/195/GCA_002844195.1_ASM284419v1	ftp://ftp.ncbi.nlm.nih.gov/genomes/all/GCF/002/844/195/GCF_002844195.1_ASM284419v1
GCA_000416105.1	d__Archaea;p__Halobacteriota;c__Halobacteria;o__Halobacteriales;f__Haloferacaceae;g__Halobaculum;s__	halophilic archaeon J07HB67	Archaea;Euryarchaeota;Stenosarchaea group		SAMN01940911	PRJNA70861	Scaffold	2.64955	64		AGCZ01	3	2833	2013-06-26T00:00:00Z	ftp://ftp.ncbi.nlm.nih.gov/genomes/all/GCA/000/416/105/GCA_000416105.1_J07AB_HB67select	ftp://ftp.ncbi.nlm.nih.gov/genomes/all/GCF/000/416/105/GCF_000416105.1_J07AB_HB67select
GCA_900129775.1	d__Archaea;p__Halobacteriota;c__Halobacteria;o__Halobacteriales;f__Haloferacaceae;g__Halobaculum;s__Halobaculum gomorrense	Halobaculum gomorrense	Archaea;Euryarchaeota;Stenosarchaea group	DSM 9297	SAMN05443636	PRJEB18229	Scaffold	3.20825	68.6		FQWV01	16	3135	2016-12-02T00:00:00Z	ftp://ftp.ncbi.nlm.nih.gov/genomes/all/GCA/900/129/775/GCA_900129775.1_IMG-taxon_2695420988_annotated_assembly	ftp://ftp.ncbi.nlm.nih.gov/genomes/all/GCF/900/129/775/GCF_900129775.1_IMG-taxon_2695420988_annotated_assembly
GCA_013401515.1	d__Archaea;p__Halobacteriota;c__Halobacteria;o__Halobacteriales;f__Haloferacaceae;g__Halobaculum;s__Halobaculum halophilum	Halobaculum halophilum	Archaea;Euryarchaeota;Stenosarchaea group	Gai3-2	SAMN15183765	PRJNA638228	Complete	4.27796	67.2072	chromosome:NZ_CP058529.1/CP058529.1; plasmid unnamed1:NZ_CP058530.1/CP058530.1; plasmid unnamed2:NZ_CP058531.1/CP058531.1; plasmid unnamed3:NZ_CP058532.1/CP058532.1		4	4196	2020-07-11T00:00:00Z	ftp://ftp.ncbi.nlm.nih.gov/genomes/all/GCA/013/401/515/GCA_013401515.1_ASM1340151v1	ftp://ftp.ncbi.nlm.nih.gov/genomes/all/GCF/013/401/515/GCF_013401515.1_ASM1340151v1
GCA_019823105.1	d__Archaea;p__Halobacteriota;c__Halobacteria;o__Halobacteriales;f__Haloferacaceae;g__Halobaculum;s__Halobaculum magnesiiphilum	Halobaculum magnesiiphilum	Archaea;Euryarchaeota;Stenosarchaea group	NBRC 109044	SAMN20958642	PRJNA757273	Complete	3.73245	67.9008	chromosome:NZ_CP081958.1/CP081958.1; plasmid unnamed1:NZ_CP081959.1/CP081959.1; plasmid unnamed2:NZ_CP081960.1/CP081960.1; plasmid unnamed3:NZ_CP081961.1/CP081961.1		4	3645	2021-08-31T00:00:00Z	ftp://ftp.ncbi.nlm.nih.gov/genomes/all/GCA/019/823/105/GCA_019823105.1_ASM1982310v1	ftp://ftp.ncbi.nlm.nih.gov/genomes/all/GCF/019/823/105/GCF_019823105.1_ASM1982310v1
GCA_019880225.1	d__Archaea;p__Halobacteriota;c__Halobacteria;o__Halobacteriales;f__Haloferacaceae;g__Halobaculum;s__Halobaculum rubrum	Halobaculum rubrum	Archaea;Euryarchaeota;Stenosarchaea group	C46	SAMN20957702	PRJNA757259	Complete	3.05805	68.4028	chromosome:NZ_CP082284.1/CP082284.1; plasmid unnamed1:NZ_CP082285.1/CP082285.1		2	3018	2021-09-05T00:00:00Z	ftp://ftp.ncbi.nlm.nih.gov/genomes/all/GCA/019/880/225/GCA_019880225.1_ASM1988022v1	ftp://ftp.ncbi.nlm.nih.gov/genomes/all/GCF/019/880/225/GCF_019880225.1_ASM1988022v1
GCA_013402875.1	d__Archaea;p__Halobacteriota;c__Halobacteria;o__Halobacteriales;f__Haloferacaceae;g__Halobaculum;s__Halobaculum salinum	Halobaculum salinum	Archaea;Euryarchaeota;Stenosarchaea group	NJ-3-1	SAMN15183787	PRJNA638230	Complete	4.25875	68.6631	chromosome:NZ_CP058579.1/CP058579.1; plasmid unnamed1:NZ_CP058580.1/CP058580.1		2	4174	2020-07-12T00:00:00Z	ftp://ftp.ncbi.nlm.nih.gov/genomes/all/GCA/013/402/875/GCA_013402875.1_ASM1340287v1	ftp://ftp.ncbi.nlm.nih.gov/genomes/all/GCF/013/402/875/GCF_013402875.1_ASM1340287v1
GCA_003020945.1	d__Archaea;p__Halobacteriota;c__Halobacteria;o__Halobacteriales;f__Haloferacaceae;g__Halobaculum;s__Halobaculum sp003020945	Halobacteriales archaeon QS_6_71_20	Archaea;Euryarchaeota;Stenosarchaea group	QS_6_71_20	SAMN06020785	PRJNA351262	Scaffold	2.64729	70.9		PXRU01	32	2456	2018-03-27T00:00:00Z	ftp://ftp.ncbi.nlm.nih.gov/genomes/all/GCA/003/020/945/GCA_003020945.1_ASM302094v1
GCA_021431925.1	d__Archaea;p__Halobacteriota;c__Halobacteria;o__Halobacteriales;f__Haloferacaceae;g__Halobaculum;s__Halobaculum sp021431925	Halobaculum sp. CBA1158	Archaea;Euryarchaeota;Stenosarchaea group	CBA1158	SAMN24046656	PRJNA789115	Complete	3.32012	68.7408	chromosome:NZ_CP090371.1/CP090371.1; plasmid pCBA1158-1:NZ_CP090372.1/CP090372.1; plasmid pCBA1158-2:NZ_CP090373.1/CP090373.1; plasmid pCBA1158-3:NZ_CP090374.1/CP090374.1		4	3323	2022-01-11T00:00:00Z	ftp://ftp.ncbi.nlm.nih.gov/genomes/all/GCA/021/431/925/GCA_021431925.1_ASM2143192v1	ftp://ftp.ncbi.nlm.nih.gov/genomes/all/GCF/021/431/925/GCF_021431925.1_ASM2143192v1
GCA_007655485.1	d__Archaea;p__Halobacteriota;c__Halobacteria;o__Halobacteriales;f__Haloferacaceae;g__Halobellus;s__Halobellus captivus	Halobellus captivus	Archaea;Euryarchaeota;Stenosarchaea group	ZY21	SAMN12091411	PRJNA549549	Scaffold	3.35154	62.9		VJXQ01	21	3177	2019-07-30T00:00:00Z	ftp://ftp.ncbi.nlm.nih.gov/genomes/all/GCA/007/655/485/GCA_007655485.1_ASM765548v1	ftp://ftp.ncbi.nlm.nih.gov/genomes/all/GCF/007/655/485/GCF_007655485.1_ASM765548v1
GCA_900108165.1	d__Archaea;p__Halobacteriota;c__Halobacteria;o__Halobacteriales;f__Haloferacaceae;g__Halobellus;s__Halobellus limi	Halobellus limi	Archaea;Euryarchaeota;Stenosarchaea group	CGMCC 1.10331	SAMN04488133	PRJEB16687	Scaffold	3.73596	65.9		FNVN01	11	3604	2016-10-24T00:00:00Z	ftp://ftp.ncbi.nlm.nih.gov/genomes/all/GCA/900/108/165/GCA_900108165.1_IMG-taxon_2619618869_annotated_assembly	ftp://ftp.ncbi.nlm.nih.gov/genomes/all/GCF/900/108/165/GCF_900108165.1_IMG-taxon_2619618869_annotated_assembly
GCA_014646875.1	d__Archaea;p__Halobacteriota;c__Halobacteria;o__Halobacteriales;f__Haloferacaceae;g__Halobellus;s__Halobellus salinus	Halobellus salinus	Archaea;Euryarchaeota;Stenosarchaea group	JCM 14359	SAMD00245245	PRJDB10510	Scaffold	3.06752	65.4		BMOC01	54	2863	2020-09-11T00:00:00Z	ftp://ftp.ncbi.nlm.nih.gov/genomes/all/GCA/014/646/875/GCA_014646875.1_ASM1464687v1	ftp://ftp.ncbi.nlm.nih.gov/genomes/all/GCF/014/646/875/GCF_014646875.1_ASM1464687v1
GCA_001190965.1	d__Archaea;p__Halobacteriota;c__Halobacteria;o__Halobacteriales;f__Haloferacaceae;g__Haloferax;s__Haloferax gibbonsii	Haloferax gibbonsii	Archaea;Euryarchaeota;Stenosarchaea group	ARA6	SAMN03755233	PRJNA285662	Complete	3.91845	66.2381	chromosome:NZ_CP011947.1/CP011947.1; plasmid pHG1:NZ_CP011948.1/CP011948.1; plasmid pHG2:NZ_CP011949.1/CP011949.1; plasmid pHG3:NZ_CP011950.1/CP011950.1; plasmid pHG4:NZ_CP011951.1/CP011951.1		5	3833	2015-08-03T00:00:00Z	ftp://ftp.ncbi.nlm.nih.gov/genomes/all/GCA/001/190/965/GCA_001190965.1_ASM119096v1	ftp://ftp.ncbi.nlm.nih.gov/genomes/all/GCF/001/190/965/GCF_001190965.1_ASM119096v1
GCA_014969745.1	d__Archaea;p__Halobacteriota;c__Halobacteria;o__Halobacteriales;f__Haloferacaceae;g__Haloferax;s__Haloferax gibbonsii	Haloferax gibbonsii	Archaea;Euryarchaeota;Stenosarchaea group	LR2-5	SAMN15808703	PRJNA656928	Complete	3.99624	65.9274	chromosome:NZ_CP063205.1/CP063205.1; plasmid pHGLR1:NZ_CP063206.1/CP063206.1; plasmid pHGLR2:NZ_CP063207.1/CP063207.1; plasmid pHGLR3:NZ_CP063208.1/CP063208.1		4	3900	2020-10-27T00:00:00Z	ftp://ftp.ncbi.nlm.nih.gov/genomes/all/GCA/014/969/745/GCA_014969745.1_ASM1496974v1	ftp://ftp.ncbi.nlm.nih.gov/genomes/all/GCF/014/969/745/GCF_014969745.1_ASM1496974v1
GCA_003383025.1	d__Archaea;p__Halobacteriota;c__Halobacteria;o__Halobacteriales;f__Haloferacaceae;g__Haloferax;s__Haloferax gibbonsii	Haloferax sp. Atlit-4N	Archaea;Euryarchaeota;Stenosarchaea group	Atlit-4N	SAMN08382974	PRJNA431124	Scaffold	4.17621	65.4		PSYY01	142	4107	2018-08-13T00:00:00Z	ftp://ftp.ncbi.nlm.nih.gov/genomes/all/GCA/003/383/025/GCA_003383025.1_ASM338302v1	ftp://ftp.ncbi.nlm.nih.gov/genomes/all/GCF/003/383/025/GCF_003383025.1_ASM338302v1
GCA_900109695.1	d__Archaea;p__Halobacteriota;c__Halobacteria;o__Halobacteriales;f__Haloferacaceae;g__Haloferax;s__Haloferax larsenii	Haloferax larsenii	Archaea;Euryarchaeota;Stenosarchaea group	CDM_5	SAMN04488691	PRJEB16866	Scaffold	3.89408	61.6		FOAD01	24	3848	2016-10-29T00:00:00Z	ftp://ftp.ncbi.nlm.nih.gov/genomes/all/GCA/900/109/695/GCA_900109695.1_IMG-taxon_2639762639_annotated_assembly	ftp://ftp.ncbi.nlm.nih.gov/genomes/all/GCF/900/109/695/GCF_900109695.1_IMG-taxon_2639762639_annotated_assembly
GCA_001368915.1	d__Archaea;p__Halobacteriota;c__Halobacteria;o__Halobacteriales;f__Haloferacaceae;g__Haloferax;s__Haloferax massiliensis	Haloferax massiliensis	Archaea;Euryarchaeota;Stenosarchaea group	Arc-Hr	SAMEA3309464	PRJEB5949	Scaffold	4.01518	66.2		CSTE01	8	3836	2015-04-21T00:00:00Z	ftp://ftp.ncbi.nlm.nih.gov/genomes/all/GCA/001/368/915/GCA_001368915.1_PRJEB5949_assembly_1	ftp://ftp.ncbi.nlm.nih.gov/genomes/all/GCF/001/368/915/GCF_001368915.1_PRJEB5949_assembly_1
GCA_005406325.1	d__Archaea;p__Halobacteriota;c__Halobacteria;o__Halobacteriales;f__Haloferacaceae;g__Haloferax;s__Haloferax mediterranei	Haloferax mediterranei ATCC 33500	Archaea;Euryarchaeota;Stenosarchaea group	ATCC 33500	SAMN11356524	PRJNA412908	Complete	3.90747	60.243	chromosome:NZ_CP039139.1/CP039139.1; plasmid pHME132:NZ_CP039142.1/CP039142.1; plasmid pHME322:NZ_CP039141.1/CP039141.1; plasmid pHME505:NZ_CP039140.1/CP039140.1		4	3785	2019-05-16T00:00:00Z	ftp://ftp.ncbi.nlm.nih.gov/genomes/all/GCA/005/406/325/GCA_005406325.1_ASM540632v1	ftp://ftp.ncbi.nlm.nih.gov/genomes/all/GCF/005/406/325/GCF_005406325.1_ASM540632v1
GCA_000306765.2	d__Archaea;p__Halobacteriota;c__Halobacteria;o__Halobacteriales;f__Haloferacaceae;g__Haloferax;s__Haloferax mediterranei	Haloferax mediterranei ATCC 33500	Archaea;Euryarchaeota;Stenosarchaea group	CGMCC 1.2087	SAMN02603397	PRJNA43185	Complete	3.90471	60.2551	chromosome:NC_017941.2/CP001868.2; plasmid pHM100:NC_017942.1/CP001869.1; plasmid pHM300:NC_017943.1/CP001870.1; plasmid pHM500:NC_017944.1/CP001871.1		4	3781	2012-05-22T00:00:00Z	ftp://ftp.ncbi.nlm.nih.gov/genomes/all/GCA/000/306/765/GCA_000306765.2_ASM30676v2	ftp://ftp.ncbi.nlm.nih.gov/genomes/all/GCF/000/306/765/GCF_000306765.2_ASM30676v2
GCA_000685635.1	d__Archaea;p__Halobacteriota;c__Halobacteria;o__Halobacteriales;f__Haloferacaceae;g__Haloferax;s__Haloferax mediterranei	Haloferax mediterranei ATCC 33500	Archaea;Euryarchaeota;Stenosarchaea group	ATCC 33500	SAMN02724739	PRJNA238908	Chromosome	3.9067	60.2417	chromosome:NZ_CP007551.1/CP007551.1; plasmid HMPLAS1:NZ_CP007554.1/CP007554.1; plasmid HMPLAS2:NZ_CP007553.1/CP007553.1; plasmid HMPLAS3:NZ_CP007552.1/CP007552.1		4	3697	2014-05-08T00:00:00Z	ftp://ftp.ncbi.nlm.nih.gov/genomes/all/GCA/000/685/635/GCA_000685635.1_ASM68563v1	ftp://ftp.ncbi.nlm.nih.gov/genomes/all/GCF/000/685/635/GCF_000685635.1_ASM68563v1
GCA_000723845.1	d__Archaea;p__Halobacteriota;c__Halobacteria;o__Halobacteriales;f__Haloferacaceae;g__Haloferax;s__Haloferax prahovense	Haloferax prahovense	Archaea;Euryarchaeota;Stenosarchaea group	Arc-Hr	SAMEA3139050	PRJEB5511	Scaffold	3.89363	66		CCDK01	5	3813	2014-05-15T00:00:00Z	ftp://ftp.ncbi.nlm.nih.gov/genomes/all/GCA/000/723/845/GCA_000723845.1_PRJEB5511_assembly_1	ftp://ftp.ncbi.nlm.nih.gov/genomes/all/GCF/000/723/845/GCF_000723845.1_PRJEB5511_assembly_1
GCA_003586325.1	d__Archaea;p__Halobacteriota;c__Halobacteria;o__Halobacteriales;f__Haloferacaceae;g__Haloferax;s__Haloferax prahovense	Haloferax sp. Atlit-10N	Archaea;Euryarchaeota;Stenosarchaea group	Atlit-10N	SAMN08382976	PRJNA431124	Scaffold	4.26135	65.3		PSYX01	205	4245	2018-08-13T00:00:00Z	ftp://ftp.ncbi.nlm.nih.gov/genomes/all/GCA/003/586/325/GCA_003586325.1_ASM358632v1	ftp://ftp.ncbi.nlm.nih.gov/genomes/all/GCF/003/586/325/GCF_003586325.1_ASM358632v1
GCA_001482285.1	d__Archaea;p__Halobacteriota;c__Halobacteria;o__Halobacteriales;f__Haloferacaceae;g__Haloferax;s__Haloferax sp001482285	Haloferax sp. Q22	Archaea;Euryarchaeota;Stenosarchaea group	Q22	SAMN04018175	PRJNA294240	Scaffold	3.97756	65.1		LOEP01	56	3956	2015-12-23T00:00:00Z	ftp://ftp.ncbi.nlm.nih.gov/genomes/all/GCA/001/482/285/GCA_001482285.1_ASM148228v1	ftp://ftp.ncbi.nlm.nih.gov/genomes/all/GCF/001/482/285/GCF_001482285.1_ASM148228v1
GCA_000025685.1	d__Archaea;p__Halobacteriota;c__Halobacteria;o__Halobacteriales;f__Haloferacaceae;g__Haloferax;s__Haloferax volcanii	Haloferax volcanii DS2	Archaea;Euryarchaeota;Stenosarchaea group	DS2	SAMN02604027	PRJNA12524	Complete	4.0129	65.4625	chromosome:NC_013967.1/CP001956.1; plasmid pHV1:NC_013968.1/CP001957.1; plasmid pHV2:NC_013965.1/CP001954.1; plasmid pHV3:NC_013964.1/CP001953.1; plasmid pHV4:NC_013966.1/CP001955.1		5	3913	2010-03-23T00:00:00Z	ftp://ftp.ncbi.nlm.nih.gov/genomes/all/GCA/000/025/685/GCA_000025685.1_ASM2568v1	ftp://ftp.ncbi.nlm.nih.gov/genomes/all/GCF/000/025/685/GCF_000025685.1_ASM2568v1
GCA_010692905.1	d__Archaea;p__Halobacteriota;c__Halobacteria;o__Halobacteriales;f__Haloferacaceae;g__Haloferax;s__Haloferax volcanii	Haloferax alexandrinus	Archaea;Euryarchaeota;Stenosarchaea group	wsp1	SAMN14048689	PRJNA605089	Complete	3.70698	66.1	chromosome:NZ_CP048738.1/CP048738.1		1	3656	2020-02-18T00:00:00Z	ftp://ftp.ncbi.nlm.nih.gov/genomes/all/GCA/010/692/905/GCA_010692905.1_ASM1069290v1	ftp://ftp.ncbi.nlm.nih.gov/genomes/all/GCF/010/692/905/GCF_010692905.1_ASM1069290v1
GCA_012726105.1	d__Archaea;p__Halobacteriota;c__Halobacteria;o__Halobacteriales;f__Haloferacaceae;g__Haloferax;s__Haloferax volcanii	Haloferax alexandrinus	Archaea;Euryarchaeota;Stenosarchaea group	pws11	SAMN13475836	PRJNA593354	Scaffold	3.66966	66.1		WOWC01	3	3505	2020-04-23T00:00:00Z	ftp://ftp.ncbi.nlm.nih.gov/genomes/all/GCA/012/726/105/GCA_012726105.1_ASM1272610v1	ftp://ftp.ncbi.nlm.nih.gov/genomes/all/GCF/012/726/105/GCF_012726105.1_ASM1272610v1
GCA_014530665.1	d__Archaea;p__Halobacteriota;c__Halobacteria;o__Halobacteriales;f__Haloferacaceae;g__Haloferax;s__Haloferax volcanii	Haloferax sp. AS1	Archaea;Euryarchaeota;Stenosarchaea group	AS1	SAMN11267987	PRJNA529474	Scaffold	3.77809	66.1		SPSA01	3	3582	2020-09-14T00:00:00Z	ftp://ftp.ncbi.nlm.nih.gov/genomes/all/GCA/014/530/665/GCA_014530665.1_ASM1453066v1	ftp://ftp.ncbi.nlm.nih.gov/genomes/all/GCF/014/530/665/GCF_014530665.1_ASM1453066v1
GCA_000172995.2	d__Archaea;p__Halobacteriota;c__Halobacteria;o__Halobacteriales;f__Haloferacaceae;g__Halogeometricum;s__Halogeometricum borinquense	Halogeometricum borinquense DSM 11551	Archaea;Euryarchaeota;Stenosarchaea group	PR 3	SAMN00002580	PRJNA20743	Complete	3.94447	59.9709	chromosome:NC_014729.1/CP001690.1; plasmid pHBOR01:NC_014735.1/CP001691.1; plasmid pHBOR02:NC_014731.1/CP001692.1; plasmid pHBOR03:NC_014736.1/CP001693.1; plasmid pHBOR04:NC_014732.1/CP001694.1; plasmid pHBOR05:NC_014737.1/CP001695.1		6	3807	2010-11-22T00:00:00Z	ftp://ftp.ncbi.nlm.nih.gov/genomes/all/GCA/000/172/995/GCA_000172995.2_ASM17299v2	ftp://ftp.ncbi.nlm.nih.gov/genomes/all/GCF/000/172/995/GCF_000172995.2_ASM17299v2
GCA_010692885.1	d__Archaea;p__Halobacteriota;c__Halobacteria;o__Halobacteriales;f__Haloferacaceae;g__Halogeometricum;s__Halogeometricum borinquense	Halogeometricum borinquense	Archaea;Euryarchaeota;Stenosarchaea group	wsp4	SAMN14053718	PRJNA605299	Complete	3.99432	59.7	chromosome:NZ_CP048739.1/CP048739.1		1	3908	2020-02-18T00:00:00Z	ftp://ftp.ncbi.nlm.nih.gov/genomes/all/GCA/010/692/885/GCA_010692885.1_ASM1069288v1	ftp://ftp.ncbi.nlm.nih.gov/genomes/all/GCF/010/692/885/GCF_010692885.1_ASM1069288v1
GCA_004150395.1	d__Archaea;p__Halobacteriota;c__Halobacteria;o__Halobacteriales;f__Haloferacaceae;g__Halogeometricum;s__Halogeometricum borinquense	Halogeometricum borinquense	Archaea;Euryarchaeota;Stenosarchaea group	N11	SAMN10643321	PRJNA511755	Scaffold	4.00178	59.8		RZHH01	12	3918	2019-02-07T00:00:00Z	ftp://ftp.ncbi.nlm.nih.gov/genomes/all/GCA/004/150/395/GCA_004150395.1_ASM415039v1	ftp://ftp.ncbi.nlm.nih.gov/genomes/all/GCF/004/150/395/GCF_004150395.1_ASM415039v1
GCA_011765365.1	d__Archaea;p__Halobacteriota;c__Halobacteria;o__Halobacteriales;f__Haloferacaceae;g__Halogeometricum;s__Halogeometricum borinquense	Halogeometricum borinquense	Archaea;Euryarchaeota;Stenosarchaea group	wsp3	SAMN13341696	PRJNA590870	Complete	2.81855	61	chromosome:CP050274.1		1	2764	2020-03-29T00:00:00Z	ftp://ftp.ncbi.nlm.nih.gov/genomes/all/GCA/011/765/365/GCA_011765365.1_ASM1176536v1	ftp://ftp.ncbi.nlm.nih.gov/genomes/all/GCF/011/765/365/GCF_011765365.1_ASM1176536v1
GCA_900114455.1	d__Archaea;p__Halobacteriota;c__Halobacteria;o__Halobacteriales;f__Haloferacaceae;g__Halogranum;s__Halogranum rubrum	Halogranum rubrum	Archaea;Euryarchaeota;Stenosarchaea group	CGMCC 1.7738	SAMN04487950	PRJEB17446	Scaffold	4.56668	62.2		FOTC01	17	4443	2016-10-31T00:00:00Z	ftp://ftp.ncbi.nlm.nih.gov/genomes/all/GCA/900/114/455/GCA_900114455.1_IMG-taxon_2619618990_annotated_assembly	ftp://ftp.ncbi.nlm.nih.gov/genomes/all/GCF/900/114/455/GCF_900114455.1_IMG-taxon_2619618990_annotated_assembly
GCA_011627345.1	d__Archaea;p__Halobacteriota;c__Halobacteria;o__Halobacteriales;f__Haloferacaceae;g__Halolamina;s__Halolamina pelagica	Halolamina sp. R1-12	Archaea;Euryarchaeota;Stenosarchaea group	R1-12	SAMN14309520	PRJNA610670	Scaffold	3.1615	67.1		JAANTI01	24	3093	2020-03-23T00:00:00Z	ftp://ftp.ncbi.nlm.nih.gov/genomes/all/GCA/011/627/345/GCA_011627345.1_ASM1162734v1	ftp://ftp.ncbi.nlm.nih.gov/genomes/all/GCF/011/627/345/GCF_011627345.1_ASM1162734v1
GCA_000224475.1	d__Archaea;p__Halobacteriota;c__Halobacteria;o__Halobacteriales;f__Haloferacaceae;g__Halolamina;s__Halolamina sp000224475	halophilic archaeon DL31	Archaea;Euryarchaeota;Stenosarchaea group	DL31	SAMN02232027	PRJNA52855	Complete	3.64316	62.3733	chromosome:CP002988.1; plasmid phalar01:CP002989.1; plasmid phalar02:CP002990.1		3	3476	2011-08-26T00:00:00Z	ftp://ftp.ncbi.nlm.nih.gov/genomes/all/GCA/000/224/475/GCA_000224475.1_ASM22447v1	ftp://ftp.ncbi.nlm.nih.gov/genomes/all/GCF/000/224/475/GCF_000224475.1_ASM22447v1
GCA_000416065.1	d__Archaea;p__Halobacteriota;c__Halobacteria;o__Halobacteriales;f__Haloferacaceae;g__Halonotius;s__	Halonotius sp. J07HN4	Archaea;Euryarchaeota;Stenosarchaea group		SAMN01940911	PRJNA70847	Scaffold	2.88866	60.5		AGCX01	2	3226	2013-06-26T00:00:00Z	ftp://ftp.ncbi.nlm.nih.gov/genomes/all/GCA/000/416/065/GCA_000416065.1_HN4_v3_031612	ftp://ftp.ncbi.nlm.nih.gov/genomes/all/GCF/000/416/065/GCF_000416065.1_HN4_v3_031612
GCA_003605575.1	d__Archaea;p__Halobacteriota;c__Halobacteria;o__Halobacteriales;f__Haloferacaceae;g__Halonotius;s__Halonotius aquaticus	Halonotius aquaticus	Archaea;Euryarchaeota;Stenosarchaea group	F13-13	SAMN09370719	PRJNA474712	Scaffold	2.46839	61.2		QKNY01	18	2497	2018-10-02T00:00:00Z	ftp://ftp.ncbi.nlm.nih.gov/genomes/all/GCA/003/605/575/GCA_003605575.1_ASM360557v1	ftp://ftp.ncbi.nlm.nih.gov/genomes/all/GCF/003/605/575/GCF_003605575.1_ASM360557v1
GCA_006861655.1	d__Archaea;p__Halobacteriota;c__Halobacteria;o__Halobacteriales;f__Haloferacaceae;g__Halonotius;s__Halonotius roseus	Halonotius roseus	Archaea;Euryarchaeota;Stenosarchaea group	F9-27	SAMN10868424	PRJNA520816	Scaffold	2.56434	62.7		SESI01	4	2647	2019-07-10T00:00:00Z	ftp://ftp.ncbi.nlm.nih.gov/genomes/all/GCA/006/861/655/GCA_006861655.1_ASM686165v1	ftp://ftp.ncbi.nlm.nih.gov/genomes/all/GCF/006/861/655/GCF_006861655.1_ASM686165v1
GCA_000416025.1	d__Archaea;p__Halobacteriota;c__Halobacteria;o__Halobacteriales;f__Haloferacaceae;g__Halonotius;s__Halonotius sp000496215	Halonotius sp. J07HN6	Archaea;Euryarchaeota;Stenosarchaea group		SAMN01940911	PRJNA176228	Scaffold	2.529	62.2		ARQA01	6	2913	2013-06-26T00:00:00Z	ftp://ftp.ncbi.nlm.nih.gov/genomes/all/GCA/000/416/025/GCA_000416025.1_HN6_031912	ftp://ftp.ncbi.nlm.nih.gov/genomes/all/GCF/000/416/025/GCF_000416025.1_HN6_031912
GCA_006861665.1	d__Archaea;p__Halobacteriota;c__Halobacteria;o__Halobacteriales;f__Haloferacaceae;g__Halonotius;s__Halonotius terrestris	Halonotius terrestris	Archaea;Euryarchaeota;Stenosarchaea group	F15B	SAMN10397912	PRJNA504758	Scaffold	2.84144	61.8		RKLU01	26	2863	2019-07-10T00:00:00Z	ftp://ftp.ncbi.nlm.nih.gov/genomes/all/GCA/006/861/665/GCA_006861665.1_ASM686166v1	ftp://ftp.ncbi.nlm.nih.gov/genomes/all/GCF/006/861/665/GCF_006861665.1_ASM686166v1
GCA_001462205.1	d__Archaea;p__Halobacteriota;c__Halobacteria;o__Halobacteriales;f__Haloferacaceae;g__Haloparvum;s__Haloparvum sedimenti	Haloparvum sedimenti	Archaea;Euryarchaeota;Stenosarchaea group	DYS4	SAMN04018174	PRJNA294239	Scaffold	3.24305	68.2		LKIR01	143	3202	2015-12-08T00:00:00Z	ftp://ftp.ncbi.nlm.nih.gov/genomes/all/GCA/001/462/205/GCA_001462205.1_HalopeDYS1.0	ftp://ftp.ncbi.nlm.nih.gov/genomes/all/GCF/001/462/205/GCF_001462205.1_HalopeDYS1.0
GCA_003351065.1	d__Archaea;p__Halobacteriota;c__Halobacteria;o__Halobacteriales;f__Haloferacaceae;g__Halopelagius;s__Halopelagius longus	Halopelagius longus	Archaea;Euryarchaeota;Stenosarchaea group	BC12-B1	SAMN09717241	PRJNA482879	Scaffold	3.879	65.7		QQST01	8	3744	2018-07-31T00:00:00Z	ftp://ftp.ncbi.nlm.nih.gov/genomes/all/GCA/003/351/065/GCA_003351065.1_ASM335106v1	ftp://ftp.ncbi.nlm.nih.gov/genomes/all/GCF/003/351/065/GCF_003351065.1_ASM335106v1
GCA_900108505.1	d__Archaea;p__Halobacteriota;c__Halobacteria;o__Halobacteriales;f__Haloferacaceae;g__Halopenitus;s__Halopenitus malekzadehii	Halopenitus malekzadehii	Archaea;Euryarchaeota;Stenosarchaea group	IBRC-M10418	SAMN05192561	PRJEB15788	Scaffold	3.13682	64.5		FNWU01	41	3028	2016-10-27T00:00:00Z	ftp://ftp.ncbi.nlm.nih.gov/genomes/all/GCA/900/108/505/GCA_900108505.1_IMG-taxon_2651870118_annotated_assembly	ftp://ftp.ncbi.nlm.nih.gov/genomes/all/GCF/900/108/505/GCF_900108505.1_IMG-taxon_2651870118_annotated_assembly
GCA_010092465.1	d__Archaea;p__Halobacteriota;c__Halobacteria;o__Halobacteriales;f__Haloferacaceae;g__Halopenitus;s__Halopenitus persicus	haloarchaeon 3A1-DGR	Archaea;Euryarchaeota;Stenosarchaea group	3A1-DGR	SAMN13884822	PRJNA602166	Complete	2.89061	67.7	chromosome:CP048032.1		1	2752	2020-02-01T00:00:00Z	ftp://ftp.ncbi.nlm.nih.gov/genomes/all/GCA/010/092/465/GCA_010092465.1_ASM1009246v1	ftp://ftp.ncbi.nlm.nih.gov/genomes/all/GCF/010/092/465/GCF_010092465.1_ASM1009246v1
GCA_900107205.1	d__Archaea;p__Halobacteriota;c__Halobacteria;o__Halobacteriales;f__Haloferacaceae;g__Halopenitus;s__Halopenitus persicus	Halopenitus persicus	Archaea;Euryarchaeota;Stenosarchaea group	DC30,IBRC 10041,KCTC 4046	SAMN05216564	PRJEB16621	Scaffold	3.42449	65.5		FNPC01	27	3231	2016-10-22T00:00:00Z	ftp://ftp.ncbi.nlm.nih.gov/genomes/all/GCA/900/107/205/GCA_900107205.1_IMG-taxon_2654587885_annotated_assembly	ftp://ftp.ncbi.nlm.nih.gov/genomes/all/GCF/900/107/205/GCF_900107205.1_IMG-taxon_2654587885_annotated_assembly
GCA_000447865.2	d__Archaea;p__Halobacteriota;c__Halobacteria;o__Halobacteriales;f__Haloferacaceae;g__Halopenitus;s__Halopenitus persicus	haloarchaeon 3A1-DGR	Archaea;Euryarchaeota;Stenosarchaea group	3A1-DGR	SAMN02469738	PRJNA183189	Scaffold	2.8809	67.7		ATCR02	3	0	2013-08-19T00:00:00Z	ftp://ftp.ncbi.nlm.nih.gov/genomes/all/GCA/000/447/865/GCA_000447865.2_ASM44786v2	ftp://ftp.ncbi.nlm.nih.gov/genomes/all/GCF/000/447/865/GCF_000447865.2_ASM44786v2
GCA_002355635.1	d__Archaea;p__Halobacteriota;c__Halobacteria;o__Halobacteriales;f__Haloferacaceae;g__Halopenitus;s__Halopenitus persicus_A	Halopenitus persicus	Archaea;Euryarchaeota;Stenosarchaea group	CBA1233	SAMD00053810	PRJDB4920	Complete	3.10594	66.0045	chromosome:NZ_AP017558.1/AP017558.1; plasmid pCBA1233:NZ_AP017559.1/AP017559.1		2	2917	2016-06-23T23:03:00Z	ftp://ftp.ncbi.nlm.nih.gov/genomes/all/GCA/002/355/635/GCA_002355635.1_ASM235563v1	ftp://ftp.ncbi.nlm.nih.gov/genomes/all/GCF/002/355/635/GCF_002355635.1_ASM235563v1
GCA_003856835.1	d__Archaea;p__Halobacteriota;c__Halobacteria;o__Halobacteriales;f__Haloferacaceae;g__Haloplanus;s__Haloplanus aerogenes	Haloplanus aerogenes	Archaea;Euryarchaeota;Stenosarchaea group	JCM 16430	SAMN09684815	PRJNA481613	Complete	3.50309	65.6943	chromosome:NZ_CP034145.1/CP034145.1; plasmid pJCM16430-01:NZ_CP034146.1/CP034146.1		2	3556	2018-12-03T00:00:00Z	ftp://ftp.ncbi.nlm.nih.gov/genomes/all/GCA/003/856/835/GCA_003856835.1_ASM385683v1	ftp://ftp.ncbi.nlm.nih.gov/genomes/all/GCF/003/856/835/GCF_003856835.1_ASM385683v1
GCA_000427685.1	d__Archaea;p__Halobacteriota;c__Halobacteria;o__Halobacteriales;f__Haloferacaceae;g__Haloplanus;s__Haloplanus natans	Haloplanus natans DSM 17983	Archaea;Euryarchaeota;Stenosarchaea group	DSM 17983	SAMN02440896	PRJNA157819	Scaffold	3.79793	65		ATYM01	8	3810	2013-07-15T00:00:00Z	ftp://ftp.ncbi.nlm.nih.gov/genomes/all/GCA/000/427/685/GCA_000427685.1_ASM42768v1	ftp://ftp.ncbi.nlm.nih.gov/genomes/all/GCF/000/427/685/GCF_000427685.1_ASM42768v1
GCA_003342695.1	d__Archaea;p__Halobacteriota;c__Halobacteria;o__Halobacteriales;f__Haloferacaceae;g__Haloplanus;s__Haloplanus rubicundus	Haloplanus rubicundus	Archaea;Euryarchaeota;Stenosarchaea group	CBA1113	SAMN09684805	PRJNA481607	Complete	3.52933	66.5061	chromosome:NZ_CP031150.1/CP031150.1; plasmid pCBA1113-01:NZ_CP031151.1/CP031151.1; plasmid pCBA1113-02:NZ_CP031152.1/CP031152.1		3	3549	2018-07-26T00:00:00Z	ftp://ftp.ncbi.nlm.nih.gov/genomes/all/GCA/003/342/695/GCA_003342695.1_ASM334269v1	ftp://ftp.ncbi.nlm.nih.gov/genomes/all/GCF/003/342/695/GCF_003342695.1_ASM334269v1
GCA_003342675.1	d__Archaea;p__Halobacteriota;c__Halobacteria;o__Halobacteriales;f__Haloferacaceae;g__Haloplanus;s__Haloplanus rubicundus	Haloplanus rubicundus	Archaea;Euryarchaeota;Stenosarchaea group	CBA1112	SAMN09684735	PRJNA481590	Complete	3.77364	66.0138	chromosome:NZ_CP031148.1/CP031148.1; plasmid pCBA1112-01:NZ_CP031147.1/CP031147.1; plasmid pCBA1112-02:NZ_CP031149.1/CP031149.1		3	3790	2018-07-26T00:00:00Z	ftp://ftp.ncbi.nlm.nih.gov/genomes/all/GCA/003/342/675/GCA_003342675.1_ASM334267v1	ftp://ftp.ncbi.nlm.nih.gov/genomes/all/GCF/003/342/675/GCF_003342675.1_ASM334267v1
GCA_009762275.1	d__Archaea;p__Halobacteriota;c__Halobacteria;o__Halobacteriales;f__Haloferacaceae;g__Haloplanus;s__Haloplanus salinarum	Haloplanus rallus	Archaea;Euryarchaeota;Stenosarchaea group	MBLA0036	SAMN10524788	PRJNA508483	Complete	3.5603	66.6305	chromosome:NZ_CP034345.1/CP034345.1; plasmid pMBLA003601:NZ_CP034344.1/CP034344.1		2	3555	2019-12-18T00:00:00Z	ftp://ftp.ncbi.nlm.nih.gov/genomes/all/GCA/009/762/275/GCA_009762275.1_ASM976227v1	ftp://ftp.ncbi.nlm.nih.gov/genomes/all/GCF/009/762/275/GCF_009762275.1_ASM976227v1
GCA_023703775.1	d__Archaea;p__Halobacteriota;c__Halobacteria;o__Halobacteriales;f__Haloferacaceae;g__Haloplanus;s__Haloplanus sp023703775	Haloplanus sp. GDY1	Archaea;Euryarchaeota;Stenosarchaea group	GDY1	SAMN28772773	PRJNA843938	Complete	3.43599	67.9671	chromosome:NZ_CP098514.1/CP098514.1; plasmid unnamed1:NZ_CP098515.1/CP098515.1; plasmid unnamed2:NZ_CP098516.1/CP098516.1; plasmid unnamed3:NZ_CP098517.1/CP098517.1		4	3483	2022-06-13T00:00:00Z	ftp://ftp.ncbi.nlm.nih.gov/genomes/all/GCA/023/703/775/GCA_023703775.1_ASM2370377v1	ftp://ftp.ncbi.nlm.nih.gov/genomes/all/GCF/023/703/775/GCF_023703775.1_ASM2370377v1
GCA_023703795.1	d__Archaea;p__Halobacteriota;c__Halobacteria;o__Halobacteriales;f__Haloferacaceae;g__Haloplanus;s__Haloplanus sp023703795	Haloplanus sp. HW8-1	Archaea;Euryarchaeota;Stenosarchaea group	HW8-1	SAMN28772797	PRJNA843945	Complete	3.83989	65.3475	chromosome:NZ_CP098518.1/CP098518.1; plasmid unnamed1:NZ_CP098519.1/CP098519.1; plasmid unnamed2:NZ_CP098520.1/CP098520.1		3	3849	2022-06-13T00:00:00Z	ftp://ftp.ncbi.nlm.nih.gov/genomes/all/GCA/023/703/795/GCA_023703795.1_ASM2370379v1	ftp://ftp.ncbi.nlm.nih.gov/genomes/all/GCF/023/703/795/GCF_023703795.1_ASM2370379v1
GCA_900107665.1	d__Archaea;p__Halobacteriota;c__Halobacteria;o__Halobacteriales;f__Haloferacaceae;g__Haloplanus;s__Haloplanus vescus	Haloplanus vescus	Archaea;Euryarchaeota;Stenosarchaea group	CGMCC 1.8712	SAMN04488065	PRJEB16634	Scaffold	2.77686	65.1		FNQT01	10	2866	2016-10-22T00:00:00Z	ftp://ftp.ncbi.nlm.nih.gov/genomes/all/GCA/900/107/665/GCA_900107665.1_IMG-taxon_2617270898_annotated_assembly	ftp://ftp.ncbi.nlm.nih.gov/genomes/all/GCF/900/107/665/GCF_900107665.1_IMG-taxon_2617270898_annotated_assembly
GCA_005155585.1	d__Archaea;p__Halobacteriota;c__Halobacteria;o__Halobacteriales;f__Haloferacaceae;g__Haloprofundus;s__Haloprofundus halophilus	Haloprofundus sp. MHR1	Archaea;Euryarchaeota;Stenosarchaea group	MHR1	SAMN11514334	PRJNA539857	Complete	3.0517	65.6	chromosome:NZ_CP039833.1/CP039833.1		1	3044	2019-05-06T00:00:00Z	ftp://ftp.ncbi.nlm.nih.gov/genomes/all/GCA/005/155/585/GCA_005155585.1_ASM515558v1	ftp://ftp.ncbi.nlm.nih.gov/genomes/all/GCF/005/155/585/GCF_005155585.1_ASM515558v1
GCA_020097815.1	d__Archaea;p__Halobacteriota;c__Halobacteria;o__Halobacteriales;f__Haloferacaceae;g__Haloprofundus;s__Haloprofundus sp020097815	Haloprofundus sp. SQT7-1	Archaea;Euryarchaeota;Stenosarchaea group	SQT7-1	SAMN21437959	PRJNA763320	Complete	3.42175	64.5139	chromosome:NZ_CP083663.1/CP083663.1; plasmid unnamed1:NZ_CP083664.1/CP083664.1; plasmid unnamed2:NZ_CP083665.1/CP083665.1		3	3410	2021-09-23T00:00:00Z	ftp://ftp.ncbi.nlm.nih.gov/genomes/all/GCA/020/097/815/GCA_020097815.1_ASM2009781v1	ftp://ftp.ncbi.nlm.nih.gov/genomes/all/GCF/020/097/815/GCF_020097815.1_ASM2009781v1
GCA_020150815.1	d__Archaea;p__Halobacteriota;c__Halobacteria;o__Halobacteriales;f__Haloferacaceae;g__Haloprofundus;s__Haloprofundus sp020150815	Haloprofundus sp. Gai1-5	Archaea;Euryarchaeota;Stenosarchaea group	Gai1-5	SAMN21437237	PRJNA763292	Complete	3.72771	63.766	chromosome unnamed1:NZ_CP083723.1/CP083723.1; chromosome unnamed2:NZ_CP083724.1/CP083724.1		2	3650	2021-09-26T00:00:00Z	ftp://ftp.ncbi.nlm.nih.gov/genomes/all/GCA/020/150/815/GCA_020150815.1_ASM2015081v1	ftp://ftp.ncbi.nlm.nih.gov/genomes/all/GCF/020/150/815/GCF_020150815.1_ASM2015081v1
GCA_000009185.1	d__Archaea;p__Halobacteriota;c__Halobacteria;o__Halobacteriales;f__Haloferacaceae;g__Haloquadratum;s__Haloquadratum walsbyi	Haloquadratum walsbyi DSM 16790	Archaea;Euryarchaeota;Stenosarchaea group	DSM 16790 = HBSQ001	SAMEA3138195	PRJNA17185	Complete	3.17936	47.8971	chromosome:NC_008212.1/AM180088.1; plasmid PL47:NC_008213.1/AM180089.1		2	2712	2006-06-22T00:00:00Z	ftp://ftp.ncbi.nlm.nih.gov/genomes/all/GCA/000/009/185/GCA_000009185.1_ASM918v1	ftp://ftp.ncbi.nlm.nih.gov/genomes/all/GCF/000/009/185/GCF_000009185.1_ASM918v1
GCA_000237865.1	d__Archaea;p__Halobacteriota;c__Halobacteria;o__Halobacteriales;f__Haloferacaceae;g__Haloquadratum;s__Haloquadratum walsbyi	Haloquadratum walsbyi C23	Archaea;Euryarchaeota;Stenosarchaea group	DSM 16854 = C23	SAMEA2272799	PRJEA49335	Complete	3.26048	47.6941	chromosome:NC_017459.1/FR746099.1; plasmid PL6A:NC_017460.1/FR746101.1; plasmid PL6B:NC_017458.1/FR746102.1; plasmid PL100:NC_017457.1/FR746100.1		4	2795	2011-05-31T00:00:00Z	ftp://ftp.ncbi.nlm.nih.gov/genomes/all/GCA/000/237/865/GCA_000237865.1_ASM23786v1	ftp://ftp.ncbi.nlm.nih.gov/genomes/all/GCF/000/237/865/GCF_000237865.1_ASM23786v1
GCA_903989525.1	d__Archaea;p__Halobacteriota;c__Halobacteria;o__Halobacteriales;f__Haloferacaceae;g__Haloquadratum;s__Haloquadratum walsbyi	Haloquadratum walsbyi	Archaea;Euryarchaeota;Stenosarchaea group	D2T01	SAMEA7074294	PRJEB27680	Scaffold	3.61124	47.6		CAJEJB01	371	0	2020-07-28T00:00:00Z	ftp://ftp.ncbi.nlm.nih.gov/genomes/all/GCA/903/989/525/GCA_903989525.1_D2T1	ftp://ftp.ncbi.nlm.nih.gov/genomes/all/GCF/903/989/525/GCF_903989525.1_D2T1
GCA_903989535.1	d__Archaea;p__Halobacteriota;c__Halobacteria;o__Halobacteriales;f__Haloferacaceae;g__Haloquadratum;s__Haloquadratum walsbyi	Haloquadratum walsbyi	Archaea;Euryarchaeota;Stenosarchaea group	D2T01	SAMEA7074294	PRJEB27680	Scaffold	2.73292	47.5		CAJEJC01	479	0	2020-07-28T00:00:00Z	ftp://ftp.ncbi.nlm.nih.gov/genomes/all/GCA/903/989/535/GCA_903989535.1_D2T31	ftp://ftp.ncbi.nlm.nih.gov/genomes/all/GCF/903/989/535/GCF_903989535.1_D2T31
GCA_903989495.1	d__Archaea;p__Halobacteriota;c__Halobacteria;o__Halobacteriales;f__Haloferacaceae;g__Haloquadratum;s__Haloquadratum walsbyi	Haloquadratum walsbyi	Archaea;Euryarchaeota;Stenosarchaea group	D2T01	SAMEA7074294	PRJEB27680	Scaffold	2.43353	46.8		CAJEJD01	840	0	2020-07-28T00:00:00Z	ftp://ftp.ncbi.nlm.nih.gov/genomes/all/GCA/903/989/495/GCA_903989495.1_D2T7
GCA_000415965.1	d__Archaea;p__Halobacteriota;c__Halobacteria;o__Halobacteriales;f__Haloferacaceae;g__Haloquadratum;s__Haloquadratum walsbyi_A	Haloquadratum walsbyi J07HQW1	Archaea;Euryarchaeota;Stenosarchaea group		SAMN01940911	PRJNA176224	Scaffold	3.4755	49.4		ARPX01	1	3581	2013-06-26T00:00:00Z	ftp://ftp.ncbi.nlm.nih.gov/genomes/all/GCA/000/415/965/GCA_000415965.1_J07B_scf56329a_trim	ftp://ftp.ncbi.nlm.nih.gov/genomes/all/GCF/000/415/965/GCF_000415965.1_J07B_scf56329a_trim
GCA_000415985.1	d__Archaea;p__Halobacteriota;c__Halobacteria;o__Halobacteriales;f__Haloferacaceae;g__Haloquadratum;s__Haloquadratum walsbyi_B	Haloquadratum walsbyi J07HQW2	Archaea;Euryarchaeota;Stenosarchaea group		SAMN01940911	PRJNA176225	Scaffold	3.59454	48		ARPY01	1	3853	2013-06-26T00:00:00Z	ftp://ftp.ncbi.nlm.nih.gov/genomes/all/GCA/000/415/985/GCA_000415985.1_HQW2_08err_032412a	ftp://ftp.ncbi.nlm.nih.gov/genomes/all/GCF/000/415/985/GCF_000415985.1_HQW2_08err_032412a
GCA_000513435.1	d__Archaea;p__Halobacteriota;c__Halobacteria;o__Halobacteriales;f__Haloferacaceae;g__Halorubrum;s__	Halorubrum sp. AJ67	Archaea;Euryarchaeota;Stenosarchaea group	AJ67	SAMEA3138845	PRJEB4754	Scaffold	4.22501	59		CBVY01	50	2646	2013-12-16T00:00:00Z	ftp://ftp.ncbi.nlm.nih.gov/genomes/all/GCA/000/513/435/GCA_000513435.1_HRSP_AJ67	ftp://ftp.ncbi.nlm.nih.gov/genomes/all/GCF/000/513/435/GCF_000513435.1_HRSP_AJ67
GCA_002252955.1	d__Archaea;p__Halobacteriota;c__Halobacteria;o__Halobacteriales;f__Haloferacaceae;g__Halorubrum;s__	Halorubrum sp. E3	Archaea;Euryarchaeota;Stenosarchaea group	E3	SAMN02716036	PRJNA232799	Scaffold	4.2044	65.5		NHPI01	2763	4990	2017-08-15T00:00:00Z	ftp://ftp.ncbi.nlm.nih.gov/genomes/all/GCA/002/252/955/GCA_002252955.1_ASM225295v1
GCA_004114995.1	d__Archaea;p__Halobacteriota;c__Halobacteria;o__Halobacteriales;f__Haloferacaceae;g__Halorubrum;s__Halorubrum amylolyticum	Halorubrum amylolyticum	Archaea;Euryarchaeota;Stenosarchaea group	ZC67	SAMN10782550	PRJNA516078	Scaffold	3.63076	66.3		SDJP01	75	3441	2019-01-28T00:00:00Z	ftp://ftp.ncbi.nlm.nih.gov/genomes/all/GCA/004/114/995/GCA_004114995.1_ASM411499v1	ftp://ftp.ncbi.nlm.nih.gov/genomes/all/GCF/004/114/995/GCF_004114995.1_ASM411499v1
GCA_005435175.1	d__Archaea;p__Halobacteriota;c__Halobacteria;o__Halobacteriales;f__Haloferacaceae;g__Halorubrum;s__Halorubrum californiense	Halorubrum sp. GN11GM_10-3_MGM	Archaea;Euryarchaeota;Stenosarchaea group	GN11GM_10-3_MGM	SAMN10910409	PRJNA521777	Scaffold	3.4793	67		SGUD01	113	3372	2019-05-16T00:00:00Z	ftp://ftp.ncbi.nlm.nih.gov/genomes/all/GCA/005/435/175/GCA_005435175.1_ASM543517v1	ftp://ftp.ncbi.nlm.nih.gov/genomes/all/GCF/005/435/175/GCF_005435175.1_ASM543517v1
GCA_002252935.1	d__Archaea;p__Halobacteriota;c__Halobacteria;o__Halobacteriales;f__Haloferacaceae;g__Halorubrum;s__Halorubrum distributum	Halorubrum distributum	Archaea;Euryarchaeota;Stenosarchaea group	E8	SAMN02716037	PRJNA232799	Scaffold	2.25364	66.4		NHPH01	1277	2492	2017-08-15T00:00:00Z	ftp://ftp.ncbi.nlm.nih.gov/genomes/all/GCA/002/252/935/GCA_002252935.1_ASM225293v1
GCA_002727105.1	d__Archaea;p__Halobacteriota;c__Halobacteria;o__Halobacteriales;f__Haloferacaceae;g__Halorubrum;s__Halorubrum distributum	Halorubrum sp. C3	Archaea;Euryarchaeota;Stenosarchaea group	C3	SAMN02716033	PRJNA232799	Scaffold	3.32216	65.8		NHOB01	1164	3590	2017-10-26T00:00:00Z	ftp://ftp.ncbi.nlm.nih.gov/genomes/all/GCA/002/727/105/GCA_002727105.1_ASM272710v1
GCA_004126515.1	d__Archaea;p__Halobacteriota;c__Halobacteria;o__Halobacteriales;f__Haloferacaceae;g__Halorubrum;s__Halorubrum ezzemoulense	Halorubrum ezzemoulense	Archaea;Euryarchaeota;Stenosarchaea group	Fb21	SAMN10709458	PRJNA513349	Complete	3.7263	66.4805	chromosome:NZ_CP034940.1/CP034940.1; plasmid megaplasmid:NZ_CP034941.1/CP034941.1; plasmid unnamed1:NZ_CP034942.1/CP034942.1		3	3525	2019-02-01T00:00:00Z	ftp://ftp.ncbi.nlm.nih.gov/genomes/all/GCA/004/126/515/GCA_004126515.1_ASM412651v1	ftp://ftp.ncbi.nlm.nih.gov/genomes/all/GCF/004/126/515/GCF_004126515.1_ASM412651v1
GCA_002252835.1	d__Archaea;p__Halobacteriota;c__Halobacteria;o__Halobacteriales;f__Haloferacaceae;g__Halorubrum;s__Halorubrum ezzemoulense	Halorubrum ezzemoulense	Archaea;Euryarchaeota;Stenosarchaea group	G37	SAMN02716043	PRJNA232799	Scaffold	3.54572	67		NHPB01	120	3391	2017-08-15T00:00:00Z	ftp://ftp.ncbi.nlm.nih.gov/genomes/all/GCA/002/252/835/GCA_002252835.1_ASM225283v1	ftp://ftp.ncbi.nlm.nih.gov/genomes/all/GCF/002/252/835/GCF_002252835.1_ASM225283v1
GCA_002252875.1	d__Archaea;p__Halobacteriota;c__Halobacteria;o__Halobacteriales;f__Haloferacaceae;g__Halorubrum;s__Halorubrum ezzemoulense	Halorubrum ezzemoulense	Archaea;Euryarchaeota;Stenosarchaea group	Ec15	SAMN02716041	PRJNA232799	Scaffold	3.27496	67.7		NHPD01	73	3114	2017-08-15T00:00:00Z	ftp://ftp.ncbi.nlm.nih.gov/genomes/all/GCA/002/252/875/GCA_002252875.1_ASM225287v1	ftp://ftp.ncbi.nlm.nih.gov/genomes/all/GCF/002/252/875/GCF_002252875.1_ASM225287v1
GCA_002252805.1	d__Archaea;p__Halobacteriota;c__Halobacteria;o__Halobacteriales;f__Haloferacaceae;g__Halorubrum;s__Halorubrum ezzemoulense	Halorubrum ezzemoulense	Archaea;Euryarchaeota;Stenosarchaea group	Ga36	SAMN02716045	PRJNA232799	Scaffold	3.35296	67.7		NHOZ01	154	3243	2017-08-15T00:00:00Z	ftp://ftp.ncbi.nlm.nih.gov/genomes/all/GCA/002/252/805/GCA_002252805.1_ASM225280v1	ftp://ftp.ncbi.nlm.nih.gov/genomes/all/GCF/002/252/805/GCF_002252805.1_ASM225280v1
GCA_002252725.1	d__Archaea;p__Halobacteriota;c__Halobacteria;o__Halobacteriales;f__Haloferacaceae;g__Halorubrum;s__Halorubrum ezzemoulense	Halorubrum ezzemoulense	Archaea;Euryarchaeota;Stenosarchaea group	LD3	SAMN02716048	PRJNA232799	Scaffold	3.70247	66.4		NHOW01	238	3542	2017-08-15T00:00:00Z	ftp://ftp.ncbi.nlm.nih.gov/genomes/all/GCA/002/252/725/GCA_002252725.1_ASM225272v1	ftp://ftp.ncbi.nlm.nih.gov/genomes/all/GCF/002/252/725/GCF_002252725.1_ASM225272v1
GCA_002252735.1	d__Archaea;p__Halobacteriota;c__Halobacteria;o__Halobacteriales;f__Haloferacaceae;g__Halorubrum;s__Halorubrum ezzemoulense	Halorubrum ezzemoulense	Archaea;Euryarchaeota;Stenosarchaea group	LG1	SAMN02716049	PRJNA232799	Scaffold	4.64804	66		NHOV01	1033	4690	2017-08-15T00:00:00Z	ftp://ftp.ncbi.nlm.nih.gov/genomes/all/GCA/002/252/735/GCA_002252735.1_ASM225273v1	ftp://ftp.ncbi.nlm.nih.gov/genomes/all/GCF/002/252/735/GCF_002252735.1_ASM225273v1
GCA_005435095.1	d__Archaea;p__Halobacteriota;c__Halobacteria;o__Halobacteriales;f__Haloferacaceae;g__Halorubrum;s__Halorubrum ezzemoulense	Halorubrum sp. CGM5_25_10-8B	Archaea;Euryarchaeota;Stenosarchaea group	CGM5_25_10-8B	SAMN10910415	PRJNA521777	Scaffold	3.52066	67.3		SGTY01	51	3383	2019-05-16T00:00:00Z	ftp://ftp.ncbi.nlm.nih.gov/genomes/all/GCA/005/435/095/GCA_005435095.1_ASM543509v1	ftp://ftp.ncbi.nlm.nih.gov/genomes/all/GCF/005/435/095/GCF_005435095.1_ASM543509v1
GCA_005435025.1	d__Archaea;p__Halobacteriota;c__Halobacteria;o__Halobacteriales;f__Haloferacaceae;g__Halorubrum;s__Halorubrum ezzemoulense	Halorubrum sp. CGM4_25_10-8A	Archaea;Euryarchaeota;Stenosarchaea group	CGM4_25_10-8A	SAMN10910416	PRJNA521777	Scaffold	3.60532	66.9		SGTX01	73	3451	2019-05-16T00:00:00Z	ftp://ftp.ncbi.nlm.nih.gov/genomes/all/GCA/005/435/025/GCA_005435025.1_ASM543502v1	ftp://ftp.ncbi.nlm.nih.gov/genomes/all/GCF/005/435/025/GCF_005435025.1_ASM543502v1
GCA_005435035.1	d__Archaea;p__Halobacteriota;c__Halobacteria;o__Halobacteriales;f__Haloferacaceae;g__Halorubrum;s__Halorubrum ezzemoulense	Halorubrum sp. SD690R	Archaea;Euryarchaeota;Stenosarchaea group	SD690R	SAMN10910418	PRJNA521777	Scaffold	3.7344	66.3		SGTV01	178	3561	2019-05-16T00:00:00Z	ftp://ftp.ncbi.nlm.nih.gov/genomes/all/GCA/005/435/035/GCA_005435035.1_ASM543503v1	ftp://ftp.ncbi.nlm.nih.gov/genomes/all/GCF/005/435/035/GCF_005435035.1_ASM543503v1
GCA_002727095.1	d__Archaea;p__Halobacteriota;c__Halobacteria;o__Halobacteriales;f__Haloferacaceae;g__Halorubrum;s__Halorubrum ezzemoulense	Halorubrum sp. C191	Archaea;Euryarchaeota;Stenosarchaea group	C191	SAMN02716032	PRJNA232799	Scaffold	3.8611	66		NHNZ01	232	3724	2017-10-26T00:00:00Z	ftp://ftp.ncbi.nlm.nih.gov/genomes/all/GCA/002/727/095/GCA_002727095.1_ASM272709v1	ftp://ftp.ncbi.nlm.nih.gov/genomes/all/GCF/002/727/095/GCF_002727095.1_ASM272709v1
GCA_002135045.1	d__Archaea;p__Halobacteriota;c__Halobacteria;o__Halobacteriales;f__Haloferacaceae;g__Halorubrum;s__Halorubrum ezzemoulense	Halorubrum sp. SD683	Archaea;Euryarchaeota;Stenosarchaea group	SD683	SAMN06761387	PRJNA383329	Scaffold	3.14599	69		NEWJ01	137	3104	2017-05-12T00:00:00Z	ftp://ftp.ncbi.nlm.nih.gov/genomes/all/GCA/002/135/045/GCA_002135045.1_ASM213504v1	ftp://ftp.ncbi.nlm.nih.gov/genomes/all/GCF/002/135/045/GCF_002135045.1_ASM213504v1
GCA_002135005.1	d__Archaea;p__Halobacteriota;c__Halobacteria;o__Halobacteriales;f__Haloferacaceae;g__Halorubrum;s__Halorubrum ezzemoulense	Halorubrum sp. SD612	Archaea;Euryarchaeota;Stenosarchaea group	SD612	SAMN06761329	PRJNA383315	Scaffold	3.30813	70.1		NEWI01	402	3295	2017-05-12T00:00:00Z	ftp://ftp.ncbi.nlm.nih.gov/genomes/all/GCA/002/135/005/GCA_002135005.1_ASM213500v1	ftp://ftp.ncbi.nlm.nih.gov/genomes/all/GCF/002/135/005/GCF_002135005.1_ASM213500v1
GCA_023702125.1	d__Archaea;p__Halobacteriota;c__Halobacteria;o__Halobacteriales;f__Haloferacaceae;g__Halorubrum;s__Halorubrum hochstenium	Halorubrum sp. 1-13-X8	Archaea;Euryarchaeota;Stenosarchaea group	1-13-X8	SAMN28671404	PRJNA842494	Complete	3.06342	69.0161	chromosome:NZ_CP098415.1/CP098415.1; plasmid unnamed1:NZ_CP098416.1/CP098416.1		2	3000	2022-06-11T00:00:00Z	ftp://ftp.ncbi.nlm.nih.gov/genomes/all/GCA/023/702/125/GCA_023702125.1_ASM2370212v1	ftp://ftp.ncbi.nlm.nih.gov/genomes/all/GCF/023/702/125/GCF_023702125.1_ASM2370212v1
GCA_000022205.1	d__Archaea;p__Halobacteriota;c__Halobacteria;o__Halobacteriales;f__Haloferacaceae;g__Halorubrum;s__Halorubrum lacusprofundi	Halorubrum lacusprofundi ATCC 49239	Archaea;Euryarchaeota;Stenosarchaea group	ATCC 49239	SAMN02598407	PRJNA412908	Complete	3.69258	63.9543	chromosome 1:NC_012029.1/CP001365.1; chromosome 2:NC_012028.1/CP001366.1; plasmid pHLAC01:NC_012030.1/CP001367.1		3	3506	2009-02-04T00:00:00Z	ftp://ftp.ncbi.nlm.nih.gov/genomes/all/GCA/000/022/205/GCA_000022205.1_ASM2220v1	ftp://ftp.ncbi.nlm.nih.gov/genomes/all/GCF/000/022/205/GCF_000022205.1_ASM2220v1
GCA_002215285.1	d__Archaea;p__Halobacteriota;c__Halobacteria;o__Halobacteriales;f__Haloferacaceae;g__Halorubrum;s__Halorubrum lacusprofundi	Halorubrum lacusprofundi	Archaea;Euryarchaeota;Stenosarchaea group	HLS1	SAMN05786778	PRJNA343348	Scaffold	3.27855	65.4		MJCD01	277	3226	2017-07-06T00:00:00Z	ftp://ftp.ncbi.nlm.nih.gov/genomes/all/GCA/002/215/285/GCA_002215285.1_ASM221528v1	ftp://ftp.ncbi.nlm.nih.gov/genomes/all/GCF/002/215/285/GCF_002215285.1_ASM221528v1
GCA_002727125.1	d__Archaea;p__Halobacteriota;c__Halobacteria;o__Halobacteriales;f__Haloferacaceae;g__Halorubrum;s__Halorubrum persicum	Halorubrum persicum	Archaea;Euryarchaeota;Stenosarchaea group	C49	SAMN02716034	PRJNA232799	Scaffold	3.57835	65.9		NHOA01	158	3400	2017-10-26T00:00:00Z	ftp://ftp.ncbi.nlm.nih.gov/genomes/all/GCA/002/727/125/GCA_002727125.1_ASM272712v1	ftp://ftp.ncbi.nlm.nih.gov/genomes/all/GCF/002/727/125/GCF_002727125.1_ASM272712v1
GCA_005435135.1	d__Archaea;p__Halobacteriota;c__Halobacteria;o__Halobacteriales;f__Haloferacaceae;g__Halorubrum;s__Halorubrum salinarum	Halorubrum sp. ASP1	Archaea;Euryarchaeota;Stenosarchaea group	ASP1	SAMN10910412	PRJNA521777	Scaffold	3.6227	67.4		SGUA01	104	3569	2019-05-16T00:00:00Z	ftp://ftp.ncbi.nlm.nih.gov/genomes/all/GCA/005/435/135/GCA_005435135.1_ASM543513v1	ftp://ftp.ncbi.nlm.nih.gov/genomes/all/GCF/005/435/135/GCF_005435135.1_ASM543513v1
GCA_005435055.1	d__Archaea;p__Halobacteriota;c__Halobacteria;o__Halobacteriales;f__Haloferacaceae;g__Halorubrum;s__Halorubrum salinarum	Halorubrum sp. SS7	Archaea;Euryarchaeota;Stenosarchaea group	SS7	SAMN10910421	PRJNA521777	Scaffold	3.62994	68		SGXV01	862	3674	2019-05-16T00:00:00Z	ftp://ftp.ncbi.nlm.nih.gov/genomes/all/GCA/005/435/055/GCA_005435055.1_ASM543505v1	ftp://ftp.ncbi.nlm.nih.gov/genomes/all/GCF/005/435/055/GCF_005435055.1_ASM543505v1
GCA_005435045.1	d__Archaea;p__Halobacteriota;c__Halobacteria;o__Halobacteriales;f__Haloferacaceae;g__Halorubrum;s__Halorubrum salinarum	Halorubrum sp. SS5	Archaea;Euryarchaeota;Stenosarchaea group	SS5	SAMN10910420	PRJNA521777	Scaffold	4.842	65.7		SGXW01	2396	5580	2019-05-16T00:00:00Z	ftp://ftp.ncbi.nlm.nih.gov/genomes/all/GCA/005/435/045/GCA_005435045.1_ASM543504v1
GCA_007671685.1	d__Archaea;p__Halobacteriota;c__Halobacteria;o__Halobacteriales;f__Haloferacaceae;g__Halorubrum;s__Halorubrum salsamenti	Halorubrum salsamenti	Archaea;Euryarchaeota;Stenosarchaea group	Y69	SAMN11867824	PRJNA544987	Scaffold	3.67496	66		VCNL01	21	3513	2019-07-30T00:00:00Z	ftp://ftp.ncbi.nlm.nih.gov/genomes/all/GCA/007/671/685/GCA_007671685.1_ASM767168v1	ftp://ftp.ncbi.nlm.nih.gov/genomes/all/GCF/007/671/685/GCF_007671685.1_ASM767168v1
GCA_900111935.1	d__Archaea;p__Halobacteriota;c__Halobacteria;o__Halobacteriales;f__Haloferacaceae;g__Halorubrum;s__Halorubrum sodomense	Halorubrum sodomense	Archaea;Euryarchaeota;Stenosarchaea group	RD 26	SAMN04487937	PRJEB17094	Scaffold	3.03055	69		FOYN01	9	2997	2016-11-01T00:00:00Z	ftp://ftp.ncbi.nlm.nih.gov/genomes/all/GCA/900/111/935/GCA_900111935.1_IMG-taxon_2617270732_annotated_assembly	ftp://ftp.ncbi.nlm.nih.gov/genomes/all/GCF/900/111/935/GCF_900111935.1_IMG-taxon_2617270732_annotated_assembly
GCA_005435195.1	d__Archaea;p__Halobacteriota;c__Halobacteria;o__Halobacteriales;f__Haloferacaceae;g__Halorubrum;s__Halorubrum sodomense	Halorubrum sp. SP3	Archaea;Euryarchaeota;Stenosarchaea group	SP3	SAMN10910419	PRJNA521777	Scaffold	3.40661	67.4		SGTU01	869	3457	2019-05-16T00:00:00Z	ftp://ftp.ncbi.nlm.nih.gov/genomes/all/GCA/005/435/195/GCA_005435195.1_ASM543519v1	ftp://ftp.ncbi.nlm.nih.gov/genomes/all/GCF/005/435/195/GCF_005435195.1_ASM543519v1
GCA_005435015.1	d__Archaea;p__Halobacteriota;c__Halobacteria;o__Halobacteriales;f__Haloferacaceae;g__Halorubrum;s__Halorubrum sodomense	Halorubrum sp. SP9	Archaea;Euryarchaeota;Stenosarchaea group	SP9	SAMN10910422	PRJNA521777	Scaffold	3.65072	66.7		SGXU01	849	3655	2019-05-16T00:00:00Z	ftp://ftp.ncbi.nlm.nih.gov/genomes/all/GCA/005/435/015/GCA_005435015.1_ASM543501v1	ftp://ftp.ncbi.nlm.nih.gov/genomes/all/GCF/005/435/015/GCF_005435015.1_ASM543501v1
GCA_018228765.1	d__Archaea;p__Halobacteriota;c__Halobacteria;o__Halobacteriales;f__Haloferacaceae;g__Halorubrum;s__Halorubrum sp000296615	Halorubrum sodomense	Archaea;Euryarchaeota;Stenosarchaea group	MBLA0099	SAMN18559506	PRJNA718722	Complete	3.02182	68.9	chromosome:NZ_CP073695.1/CP073695.1		1	2809	2021-05-03T00:00:00Z	ftp://ftp.ncbi.nlm.nih.gov/genomes/all/GCA/018/228/765/GCA_018228765.1_ASM1822876v1	ftp://ftp.ncbi.nlm.nih.gov/genomes/all/GCF/018/228/765/GCF_018228765.1_ASM1822876v1
GCA_000296615.1	d__Archaea;p__Halobacteriota;c__Halobacteria;o__Halobacteriales;f__Haloferacaceae;g__Halorubrum;s__Halorubrum sp000296615	Halorubrum sp. T3	Archaea;Euryarchaeota;Stenosarchaea group	T3	SAMN02470121	PRJNA170959	Scaffold	3.16801	68.5		ALWQ01	10	3053	2012-09-10T00:00:00Z	ftp://ftp.ncbi.nlm.nih.gov/genomes/all/GCA/000/296/615/GCA_000296615.1_ASM29661v1	ftp://ftp.ncbi.nlm.nih.gov/genomes/all/GCF/000/296/615/GCF_000296615.1_ASM29661v1
GCA_000746205.1	d__Archaea;p__Halobacteriota;c__Halobacteria;o__Halobacteriales;f__Haloferacaceae;g__Halorubrum;s__Halorubrum sp000746205	Halorubrum sp. BV1	Archaea;Euryarchaeota;Stenosarchaea group	BV1	SAMN02787129	PRJNA246208	Scaffold	2.76746	66		JQKV01	42	2688	2014-08-28T00:00:00Z	ftp://ftp.ncbi.nlm.nih.gov/genomes/all/GCA/000/746/205/GCA_000746205.1_ASM74620v1	ftp://ftp.ncbi.nlm.nih.gov/genomes/all/GCF/000/746/205/GCF_000746205.1_ASM74620v1
GCA_001261915.1	d__Archaea;p__Halobacteriota;c__Halobacteria;o__Halobacteriales;f__Haloferacaceae;g__Halorubrum;s__Halorubrum sp001261915	Halorubrum sp. SD626R	Archaea;Euryarchaeota;Stenosarchaea group	SD626R	SAMEA3432861	PRJEB9482	Scaffold	3.24871	67.6		CVRT01	159	3103	2015-07-26T00:00:00Z	ftp://ftp.ncbi.nlm.nih.gov/genomes/all/GCA/001/261/915/GCA_001261915.1_Halorubrum_SD626R	ftp://ftp.ncbi.nlm.nih.gov/genomes/all/GCF/001/261/915/GCF_001261915.1_Halorubrum_SD626R
GCA_005435185.1	d__Archaea;p__Halobacteriota;c__Halobacteria;o__Halobacteriales;f__Haloferacaceae;g__Halorubrum;s__Halorubrum sp001261915	Halorubrum sp. SD626R	Archaea;Euryarchaeota;Stenosarchaea group	SD626R	SAMN10910417	PRJNA521777	Scaffold	5.82283	67.1		SGTW01	1411	5886	2019-05-16T00:00:00Z	ftp://ftp.ncbi.nlm.nih.gov/genomes/all/GCA/005/435/185/GCA_005435185.1_ASM543518v1	ftp://ftp.ncbi.nlm.nih.gov/genomes/all/GCF/005/435/185/GCF_005435185.1_ASM543518v1
GCA_002252755.1	d__Archaea;p__Halobacteriota;c__Halobacteria;o__Halobacteriales;f__Haloferacaceae;g__Halorubrum;s__Halorubrum sp002252755	Halorubrum sp. Hd13	Archaea;Euryarchaeota;Stenosarchaea group	Hd13	SAMN02716046	PRJNA232799	Scaffold	3.81132	67.6		NHOY01	130	3603	2017-08-15T00:00:00Z	ftp://ftp.ncbi.nlm.nih.gov/genomes/all/GCA/002/252/755/GCA_002252755.1_ASM225275v1	ftp://ftp.ncbi.nlm.nih.gov/genomes/all/GCF/002/252/755/GCF_002252755.1_ASM225275v1
GCA_002252925.1	d__Archaea;p__Halobacteriota;c__Halobacteria;o__Halobacteriales;f__Haloferacaceae;g__Halorubrum;s__Halorubrum sp002252755	Halorubrum sp. Ea8	Archaea;Euryarchaeota;Stenosarchaea group	Ea8	SAMN02716039	PRJNA232799	Scaffold	3.74217	67.6		NHPF01	165	3556	2017-08-15T00:00:00Z	ftp://ftp.ncbi.nlm.nih.gov/genomes/all/GCA/002/252/925/GCA_002252925.1_ASM225292v1	ftp://ftp.ncbi.nlm.nih.gov/genomes/all/GCF/002/252/925/GCF_002252925.1_ASM225292v1
GCA_002252895.1	d__Archaea;p__Halobacteriota;c__Halobacteria;o__Halobacteriales;f__Haloferacaceae;g__Halorubrum;s__Halorubrum sp002252755	Halorubrum sp. Eb13	Archaea;Euryarchaeota;Stenosarchaea group	Eb13	SAMN02716040	PRJNA232799	Scaffold	3.6267	67.6		NHPE01	153	3424	2017-08-15T00:00:00Z	ftp://ftp.ncbi.nlm.nih.gov/genomes/all/GCA/002/252/895/GCA_002252895.1_ASM225289v1	ftp://ftp.ncbi.nlm.nih.gov/genomes/all/GCF/002/252/895/GCF_002252895.1_ASM225289v1
GCA_002252965.1	d__Archaea;p__Halobacteriota;c__Halobacteria;o__Halobacteriales;f__Haloferacaceae;g__Halorubrum;s__Halorubrum sp002252755	Halorubrum sp. Ea1	Archaea;Euryarchaeota;Stenosarchaea group	Ea1	SAMN02716038	PRJNA232799	Scaffold	3.92673	67.1		NHPG01	157	3736	2017-08-15T00:00:00Z	ftp://ftp.ncbi.nlm.nih.gov/genomes/all/GCA/002/252/965/GCA_002252965.1_ASM225296v1	ftp://ftp.ncbi.nlm.nih.gov/genomes/all/GCF/002/252/965/GCF_002252965.1_ASM225296v1
GCA_003697845.1	d__Archaea;p__Halobacteriota;c__Halobacteria;o__Halobacteriales;f__Haloferacaceae;g__Halorubrum;s__Halorubrum sp003697845	Halobellus captivus	Archaea;Euryarchaeota;Stenosarchaea group	ZY8	SAMN10255630	PRJNA497350	Scaffold	3.59298	66.1		RDQE01	37	3465	2018-10-30T00:00:00Z	ftp://ftp.ncbi.nlm.nih.gov/genomes/all/GCA/003/697/845/GCA_003697845.1_ASM369784v1	ftp://ftp.ncbi.nlm.nih.gov/genomes/all/GCF/003/697/845/GCF_003697845.1_ASM369784v1
GCA_003721435.2	d__Archaea;p__Halobacteriota;c__Halobacteria;o__Halobacteriales;f__Haloferacaceae;g__Halorubrum;s__Halorubrum sp003721435	Halorubrum sp. CBA1229	Archaea;Euryarchaeota;Stenosarchaea group	CBA1229	SAMN10386377	PRJNA503951	Complete	3.58228	67.6434	chromosome:NZ_CP054585.1/CP054585.1; plasmid pCBA1229:NZ_CP054586.1/CP054586.1		2	3486	2020-06-08T00:00:00Z	ftp://ftp.ncbi.nlm.nih.gov/genomes/all/GCA/003/721/435/GCA_003721435.2_ASM372143v2	ftp://ftp.ncbi.nlm.nih.gov/genomes/all/GCF/003/721/435/GCF_003721435.2_ASM372143v2
GCA_003990725.2	d__Archaea;p__Halobacteriota;c__Halobacteria;o__Halobacteriales;f__Haloferacaceae;g__Halorubrum;s__Halorubrum sp003990725	Halorubrum sp. PV6	Archaea;Euryarchaeota;Stenosarchaea group	PV6	SAMN09425686	PRJNA476066	Complete	3.04447	66.6429	chromosome:NZ_CP030064.1/CP030064.1; plasmid pHrrPV6:NZ_CP030065.1/CP030065.1		2	2990	2018-12-21T00:00:00Z	ftp://ftp.ncbi.nlm.nih.gov/genomes/all/GCA/003/990/725/GCA_003990725.2_ASM399072v2	ftp://ftp.ncbi.nlm.nih.gov/genomes/all/GCF/003/990/725/GCF_003990725.2_ASM399072v2
GCA_009806985.1	d__Archaea;p__Halobacteriota;c__Halobacteria;o__Halobacteriales;f__Haloferacaceae;g__Halorubrum;s__Halorubrum sp009806985	Halorubrum sp. JWXQ-INN 858	Archaea;Euryarchaeota;Stenosarchaea group	858	SAMN13632794	PRJNA494838	Scaffold	3.10882	68.4		WUAX01	16	2831	2019-12-28T00:00:00Z	ftp://ftp.ncbi.nlm.nih.gov/genomes/all/GCA/009/806/985/GCA_009806985.1_ASM980698v1	ftp://ftp.ncbi.nlm.nih.gov/genomes/all/GCF/009/806/985/GCF_009806985.1_ASM980698v1
GCA_002355655.1	d__Archaea;p__Halobacteriota;c__Halobacteria;o__Halobacteriales;f__Haloferacaceae;g__Halorubrum;s__Halorubrum trapanicum_A	Halorubrum trapanicum	Archaea;Euryarchaeota;Stenosarchaea group	CBA1232	SAMD00053811	PRJDB4921	Complete	3.0802	68.5999	chromosome:NZ_AP017569.1/AP017569.1; plasmid pCBA1232-01:NZ_AP017570.1/AP017570.1; plasmid pCBA1232-02:NZ_AP017571.1/AP017571.1		3	2968	2016-07-01T00:00:00Z	ftp://ftp.ncbi.nlm.nih.gov/genomes/all/GCA/002/355/655/GCA_002355655.1_ASM235565v1	ftp://ftp.ncbi.nlm.nih.gov/genomes/all/GCF/002/355/655/GCF_002355655.1_ASM235565v1
GCA_900102375.1	d__Archaea;p__Halobacteriota;c__Halobacteria;o__Halobacteriales;f__Haloferacaceae;g__Halorubrum;s__Halorubrum xinjiangense	Halorubrum xinjiangense	Archaea;Euryarchaeota;Stenosarchaea group	CGMCC 1.3527	SAMN04488067	PRJEB15838	Scaffold	3.26138	68.3		FNBO01	25	3101	2016-10-20T00:00:00Z	ftp://ftp.ncbi.nlm.nih.gov/genomes/all/GCA/900/102/375/GCA_900102375.1_IMG-taxon_2617270761_annotated_assembly	ftp://ftp.ncbi.nlm.nih.gov/genomes/all/GCF/900/102/375/GCF_900102375.1_IMG-taxon_2617270761_annotated_assembly
GCA_000416045.1	d__Archaea;p__Halobacteriota;c__Halobacteria;o__Halobacteriales;f__Haloferacaceae;g__J07HR59;s__J07HR59 sp000496235	Halorubrum sp. J07HR59	Archaea;Euryarchaeota;Stenosarchaea group		SAMN01940911	PRJNA176230	Scaffold	2.1208	56.7		ARQB01	7	1833	2013-06-26T00:00:00Z	ftp://ftp.ncbi.nlm.nih.gov/genomes/all/GCA/000/416/045/GCA_000416045.1_HR_032012	ftp://ftp.ncbi.nlm.nih.gov/genomes/all/GCF/000/416/045/GCF_000416045.1_HR_032012
GCA_002906575.1	d__Archaea;p__Halobacteriota;c__Halobacteria;o__Halobacteriales;f__Haloferacaceae;g__Salinigranum;s__Salinigranum rubrum	Salinigranum rubrum	Archaea;Euryarchaeota;Stenosarchaea group	GX10	SAMN08381148	PRJNA430969	Complete	4.97312	65.6931	chromosome:NZ_CP026309.1/CP026309.1; plasmid unnamed1:NZ_CP026310.1/CP026310.1; plasmid unnamed2:NZ_CP026311.1/CP026311.1; plasmid unnamed3:NZ_CP026312.1/CP026312.1; plasmid unnamed4:NZ_CP026313.1/CP026313.1; plasmid unnamed5:NZ_CP026314.1/CP026314.1		6	4684	2018-01-30T00:00:00Z	ftp://ftp.ncbi.nlm.nih.gov/genomes/all/GCA/002/906/575/GCA_002906575.1_ASM290657v1	ftp://ftp.ncbi.nlm.nih.gov/genomes/all/GCF/002/906/575/GCF_002906575.1_ASM290657v1
GCA_024228675.1	d__Archaea;p__Halobacteriota;c__Halobacteria;o__Halobacteriales;f__Haloferacaceae;g__Salinigranum;s__Salinigranum sp024228675	Halobacteriaceae archaeon ZS-10	Archaea;Euryarchaeota;Stenosarchaea group	ZS-10	SAMN29427989	PRJNA854302	Complete	4.90641	66.1132	chromosome:CP100461.1; plasmid unnamed1:CP100462.1; plasmid unnamed2:CP100463.1; plasmid unnamed3:CP100464.1		4	0	2022-07-13T00:00:00Z
GCA_900103505.1	d__Archaea;p__Halobacteriota;c__Halobacteria;o__Halobacteriales;f__Natrialbaceae;g__Haloarchaeobius;s__Haloarchaeobius iranensis	Haloarchaeobius iranensis	Archaea;Euryarchaeota;Stenosarchaea group	EB21,IBRC-M 10013,KCTC 4048	SAMN05192554	PRJEB16222	Scaffold	3.76861	67.3		FNIA01	73	3750	2016-10-20T00:00:00Z	ftp://ftp.ncbi.nlm.nih.gov/genomes/all/GCA/900/103/505/GCA_900103505.1_IMG-taxon_2651870127_annotated_assembly	ftp://ftp.ncbi.nlm.nih.gov/genomes/all/GCF/900/103/505/GCF_900103505.1_IMG-taxon_2651870127_annotated_assembly
GCA_900112205.1	d__Archaea;p__Halobacteriota;c__Halobacteria;o__Halobacteriales;f__Natrialbaceae;g__Halobiforma;s__Halobiforma haloterrestris	Halobiforma haloterrestris	Archaea;Euryarchaeota;Stenosarchaea group	DSM 13078	SAMN05444422	PRJEB17125	Scaffold	4.49544	65.4		FOKW01	31	4239	2016-10-31T00:00:00Z	ftp://ftp.ncbi.nlm.nih.gov/genomes/all/GCA/900/112/205/GCA_900112205.1_IMG-taxon_2693429869_annotated_assembly	ftp://ftp.ncbi.nlm.nih.gov/genomes/all/GCF/900/112/205/GCF_900112205.1_IMG-taxon_2693429869_annotated_assembly
GCA_000226975.3	d__Archaea;p__Halobacteriota;c__Halobacteria;o__Halobacteriales;f__Natrialbaceae;g__Halobiforma;s__Halobiforma lacisalsi	Halobiforma lacisalsi AJ5	Archaea;Euryarchaeota;Stenosarchaea group	AJ5	SAMN02470038	PRJNA16192	Complete	4.38154	65.2373	chromosome:NZ_CP019285.1/CP019285.1; plasmid pHLAJ5I:NZ_CP019286.1/CP019286.1; plasmid pHLAJ5II:NZ_CP019287.1/CP019287.1		3	4126	2017-01-12T00:00:00Z	ftp://ftp.ncbi.nlm.nih.gov/genomes/all/GCA/000/226/975/GCA_000226975.3_ASM22697v3	ftp://ftp.ncbi.nlm.nih.gov/genomes/all/GCF/000/226/975/GCF_000226975.2_ASM22697v3
GCA_000455345.1	d__Archaea;p__Halobacteriota;c__Halobacteria;o__Halobacteriales;f__Natrialbaceae;g__Halopiger_A;s__Halopiger_A goleimassiliensis	Halopiger goleimassiliensis	Archaea;Euryarchaeota;Stenosarchaea group	IIH3	SAMEA2272090	PRJEB1780	Scaffold	3.90636	66.1		CBMB01	3	3785	2013-06-18T00:00:00Z	ftp://ftp.ncbi.nlm.nih.gov/genomes/all/GCA/000/455/345/GCA_000455345.1_Halgo	ftp://ftp.ncbi.nlm.nih.gov/genomes/all/GCF/000/455/345/GCF_000455345.1_Halgo
GCA_000455365.1	d__Archaea;p__Halobacteriota;c__Halobacteria;o__Halobacteriales;f__Natrialbaceae;g__Halopiger_B;s__Halopiger_B djelfimassiliensis	Halopiger djelfimassiliensis	Archaea;Euryarchaeota;Stenosarchaea group	IIH2	SAMEA2272053	PRJEB1777	Scaffold	3.77655	64.2		CBMA01	6	3629	2013-06-18T00:00:00Z	ftp://ftp.ncbi.nlm.nih.gov/genomes/all/GCA/000/455/365/GCA_000455365.1_HdjelfamassiliensisIIH2	ftp://ftp.ncbi.nlm.nih.gov/genomes/all/GCF/000/455/365/GCF_000455365.1_HdjelfamassiliensisIIH2
GCA_000217715.1	d__Archaea;p__Halobacteriota;c__Halobacteria;o__Halobacteriales;f__Natrialbaceae;g__Halopiger;s__Halopiger xanaduensis	Halopiger xanaduensis SH-6	Archaea;Euryarchaeota;Stenosarchaea group	SH-6	SAMN02232028	PRJNA56049	Complete	4.35527	65.1966	chromosome:NC_015666.1/CP002839.1; plasmid pHALXA01:NC_015658.1/CP002840.1; plasmid pHALXA02:NC_015667.1/CP002841.1; plasmid pHALXA03:NC_015659.1/CP002842.1		4	4178	2011-06-09T00:00:00Z	ftp://ftp.ncbi.nlm.nih.gov/genomes/all/GCA/000/217/715/GCA_000217715.1_ASM21771v1	ftp://ftp.ncbi.nlm.nih.gov/genomes/all/GCF/000/217/715/GCF_000217715.1_ASM21771v1
GCA_011440375.1	d__Archaea;p__Halobacteriota;c__Halobacteria;o__Halobacteriales;f__Natrialbaceae;g__Halorubellus;s__Halorubellus sp011440375	Halorubellus sp. JP-L1	Archaea;Euryarchaeota;Stenosarchaea group	JP-L1	SAMN14309521	PRJNA610671	Scaffold	3.76446	68.1		JAAOIR01	5	3541	2020-03-18T00:00:00Z	ftp://ftp.ncbi.nlm.nih.gov/genomes/all/GCA/011/440/375/GCA_011440375.1_ASM1144037v1	ftp://ftp.ncbi.nlm.nih.gov/genomes/all/GCF/011/440/375/GCF_011440375.1_ASM1144037v1
GCA_000517625.1	d__Archaea;p__Halobacteriota;c__Halobacteria;o__Halobacteriales;f__Natrialbaceae;g__Halostagnicola;s__Halostagnicola larsenii	Halostagnicola larsenii XH-48	Archaea;Euryarchaeota;Stenosarchaea group	XH-48	SAMN00117518	PRJNA71415	Complete	4.13118	60.8653	chromosome:NZ_CP007055.1/CP007055.1; plasmid unnamed:NZ_CP007056.1/CP007056.1; plasmid unnamed2:NZ_CP007057.1/CP007057.1; plasmid unnamed3:NZ_CP007058.1/CP007058.1; plasmid unnamed4:NZ_CP007059.1/CP007059.1		5	3929	2014-01-13T00:00:00Z	ftp://ftp.ncbi.nlm.nih.gov/genomes/all/GCA/000/517/625/GCA_000517625.1_ASM51762v1	ftp://ftp.ncbi.nlm.nih.gov/genomes/all/GCF/000/517/625/GCF_000517625.1_ASM51762v1
GCA_017352155.2	d__Archaea;p__Halobacteriota;c__Halobacteria;o__Halobacteriales;f__Natrialbaceae;g__Haloterrigena;s__Haloterrigena alkaliphila	Haloterrigena alkaliphila	Archaea;Euryarchaeota;Stenosarchaea group	KZCA68	SAMN18137898	PRJNA706548	Complete	4.27069	65.1123	chromosome:NZ_CP071462.1/CP071462.1; plasmid unnamed1:NZ_CP084319.1/CP084319.1; plasmid unnamed2:NZ_CP084320.1/CP084320.1		3	4046	2021-03-14T00:00:00Z	ftp://ftp.ncbi.nlm.nih.gov/genomes/all/GCA/017/352/155/GCA_017352155.2_ASM1735215v2	ftp://ftp.ncbi.nlm.nih.gov/genomes/all/GCF/017/352/155/GCF_017352155.2_ASM1735215v2
GCA_016906025.1	d__Archaea;p__Halobacteriota;c__Halobacteria;o__Halobacteriales;f__Natrialbaceae;g__Haloterrigena;s__Haloterrigena salifodinae	Haloterrigena salifodinae	Archaea;Euryarchaeota;Stenosarchaea group	BOL5-1	SAMN17385152	PRJNA412908	Complete	5.08724	64.0568	chromosome:NZ_CP069188.1/CP069188.1; plasmid pHTS96:NZ_CP069193.1/CP069193.1; plasmid pHTS138:NZ_CP069189.1/CP069189.1; plasmid pHTS171:NZ_CP069190.1/CP069190.1; plasmid pHTS220:NZ_CP069191.1/CP069191.1; plasmid pHTS280.6:NZ_CP069192.1/CP069192.1		6	4774	2021-02-18T00:00:00Z	ftp://ftp.ncbi.nlm.nih.gov/genomes/all/GCA/016/906/025/GCA_016906025.1_ASM1690602v1	ftp://ftp.ncbi.nlm.nih.gov/genomes/all/GCF/016/906/025/GCF_016906025.1_ASM1690602v1
GCA_003977755.1	d__Archaea;p__Halobacteriota;c__Halobacteria;o__Halobacteriales;f__Natrialbaceae;g__Haloterrigena;s__Haloterrigena salifodinae	Haloterrigena salifodinae	Archaea;Euryarchaeota;Stenosarchaea group	ZY19	SAMN10475404	PRJNA506895	Scaffold	4.9607	64.5		RQWN01	11	4642	2018-12-28T00:00:00Z	ftp://ftp.ncbi.nlm.nih.gov/genomes/all/GCA/003/977/755/GCA_003977755.1_ASM397775v1	ftp://ftp.ncbi.nlm.nih.gov/genomes/all/GCF/003/977/755/GCF_003977755.1_ASM397775v1
GCA_000025325.1	d__Archaea;p__Halobacteriota;c__Halobacteria;o__Halobacteriales;f__Natrialbaceae;g__Haloterrigena;s__Haloterrigena turkmenica	Haloterrigena turkmenica DSM 5511	Archaea;Euryarchaeota;Stenosarchaea group	DSM 5511	SAMN02598471	PRJNA30411	Complete	5.44078	64.2484	chromosome:NC_013743.1/CP001860.1; plasmid pHTUR01:NC_013744.1/CP001861.1; plasmid pHTUR02:NC_013745.1/CP001862.1; plasmid pHTUR03:NC_013746.1/CP001863.1; plasmid pHTUR04:NC_013747.1/CP001864.1; plasmid pHTUR05:NC_013748.1/CP001865.1; plasmid pHTUR06:NC_013749.1/CP001866.1		7	5046	2010-01-19T00:00:00Z	ftp://ftp.ncbi.nlm.nih.gov/genomes/all/GCA/000/025/325/GCA_000025325.1_ASM2532v1	ftp://ftp.ncbi.nlm.nih.gov/genomes/all/GCF/000/025/325/GCF_000025325.1_ASM2532v1
GCA_023008545.1	d__Archaea;p__Halobacteriota;c__Halobacteria;o__Halobacteriales;f__Natrialbaceae;g__Halovarius;s__Halovarius luteus	Halovarius luteus	Archaea;Euryarchaeota;Stenosarchaea group	IBRC-M 10912	SAMN27400904	PRJNA824306	Complete	4.61164	63.0703	chromosome:NZ_CP095397.1/CP095397.1; plasmid unnamed1:NZ_CP095398.1/CP095398.1; plasmid unnamed2:NZ_CP095399.1/CP095399.1		3	4372	2022-04-16T00:00:00Z	ftp://ftp.ncbi.nlm.nih.gov/genomes/all/GCA/023/008/545/GCA_023008545.1_ASM2300854v1	ftp://ftp.ncbi.nlm.nih.gov/genomes/all/GCF/023/008/545/GCF_023008545.1_ASM2300854v1
GCA_023093535.1	d__Archaea;p__Halobacteriota;c__Halobacteria;o__Halobacteriales;f__Natrialbaceae;g__Halovivax;s__Halovivax limisalsi	Halovivax limisalsi	Archaea;Euryarchaeota;Stenosarchaea group	IBRC-M 10022	SAMN27554405	PRJNA826305	Complete	3.89482	66.8	chromosome:NZ_CP095757.1/CP095757.1		1	3535	2022-04-23T00:00:00Z	ftp://ftp.ncbi.nlm.nih.gov/genomes/all/GCA/023/093/535/GCA_023093535.1_ASM2309353v1	ftp://ftp.ncbi.nlm.nih.gov/genomes/all/GCF/023/093/535/GCF_023093535.1_ASM2309353v1
GCA_024300625.1	d__Archaea;p__Halobacteriota;c__Halobacteria;o__Halobacteriales;f__Natrialbaceae;g__Halovivax;s__Halovivax sp024300625	Halovivax sp. CGA30	Archaea;Euryarchaeota;Stenosarchaea group	CGA30	SAMN29426050	PRJNA854277	Complete	3.70063	63.1	chromosome:NZ_CP101322.1/CP101322.1		1	3442	2022-07-18T00:00:00Z		ftp://ftp.ncbi.nlm.nih.gov/genomes/all/GCF/024/300/625/GCF_024300625.1_ASM2430062v1
GCA_022869805.1	d__Archaea;p__Halobacteriota;c__Halobacteria;o__Halobacteriales;f__Natrialbaceae;g__JALIQP01;s__JALIQP01 sp022869805	Halobacteriaceae archaeon LT55	Archaea;Euryarchaeota;Stenosarchaea group	LT55	SAMN27190933	PRJNA822522	Complete	5.05868	64.2	chromosome:CP094974.1		1	0	2022-04-11T00:00:00Z	ftp://ftp.ncbi.nlm.nih.gov/genomes/all/GCA/022/869/805/GCA_022869805.1_ASM2286980v1
GCA_017357405.1	d__Archaea;p__Halobacteriota;c__Halobacteria;o__Halobacteriales;f__Natrialbaceae;g__KZCA124;s__KZCA124 sp017357405	Halovivax sp. KZCA124	Archaea;Euryarchaeota;Stenosarchaea group	KZCA124	SAMN18203374	PRJNA707376	Complete	5.1666	63.4336	chromosome 1:NZ_CP071597.1/CP071597.1; chromosome 2:NZ_CP071598.1/CP071598.1		2	4582	2021-03-16T00:00:00Z	ftp://ftp.ncbi.nlm.nih.gov/genomes/all/GCA/017/357/405/GCA_017357405.1_ASM1735740v1	ftp://ftp.ncbi.nlm.nih.gov/genomes/all/GCF/017/357/405/GCF_017357405.1_ASM1735740v1
GCA_002156705.1	d__Archaea;p__Halobacteriota;c__Halobacteria;o__Halobacteriales;f__Natrialbaceae;g__Natrarchaeobaculum;s__Natrarchaeobaculum aegyptiacum	Natrarchaeobaculum aegyptiacum	Archaea;Euryarchaeota;Stenosarchaea group	JW/NM-HA 15	SAMN06349942	PRJNA376078	Complete	3.93055	64.1	chromosome:NZ_CP019893.1/CP019893.1		1	3691	2017-05-23T00:00:00Z	ftp://ftp.ncbi.nlm.nih.gov/genomes/all/GCA/002/156/705/GCA_002156705.1_ASM215670v1	ftp://ftp.ncbi.nlm.nih.gov/genomes/all/GCF/002/156/705/GCF_002156705.1_ASM215670v1
GCA_003430825.1	d__Archaea;p__Halobacteriota;c__Halobacteria;o__Halobacteriales;f__Natrialbaceae;g__Natrarchaeobaculum;s__Natrarchaeobaculum sulfurireducens	Natrarchaeobaculum sulfurireducens	Archaea;Euryarchaeota;Stenosarchaea group	AArc1	SAMN07764453	PRJNA413731	Complete	3.78932	62.3556	chromosome:NZ_CP024047.1/CP024047.1; plasmid pAArc1-01:NZ_CP024045.1/CP024045.1; plasmid pAArc1-02:NZ_CP024046.1/CP024046.1		3	3583	2018-08-28T00:00:00Z	ftp://ftp.ncbi.nlm.nih.gov/genomes/all/GCA/003/430/825/GCA_003430825.1_ASM343082v1	ftp://ftp.ncbi.nlm.nih.gov/genomes/all/GCF/003/430/825/GCF_003430825.1_ASM343082v1
GCA_009807105.1	d__Archaea;p__Halobacteriota;c__Halobacteria;o__Halobacteriales;f__Natrialbaceae;g__Natrarchaeobius;s__Natrarchaeobius swarupiae	Natrialba sp. INN-245	Archaea;Euryarchaeota;Stenosarchaea group	INN-245	SAMN13632399	PRJNA494838	Scaffold	4.16263	62.4		WUBV01	65	3767	2019-12-28T00:00:00Z	ftp://ftp.ncbi.nlm.nih.gov/genomes/all/GCA/009/807/105/GCA_009807105.1_ASM980710v1	ftp://ftp.ncbi.nlm.nih.gov/genomes/all/GCF/009/807/105/GCF_009807105.1_ASM980710v1
GCA_000025625.1	d__Archaea;p__Halobacteriota;c__Halobacteria;o__Halobacteriales;f__Natrialbaceae;g__Natrialba;s__Natrialba magadii	Natrialba magadii ATCC 43099	Archaea;Euryarchaeota;Stenosarchaea group	ATCC 43099	SAMN02598473	PRJNA30691	Complete	4.44364	61.032	chromosome:NC_013922.1/CP001932.1; plasmid pNMAG01:NC_013923.1/CP001933.1; plasmid pNMAG02:NC_013924.1/CP001934.1; plasmid pNMAG03:NC_013925.1/CP001935.1		4	4095	2010-02-24T00:00:00Z	ftp://ftp.ncbi.nlm.nih.gov/genomes/all/GCA/000/025/625/GCA_000025625.1_ASM2562v1	ftp://ftp.ncbi.nlm.nih.gov/genomes/all/GCF/000/025/625/GCF_000025625.1_ASM2562v1
GCA_023008565.1	d__Archaea;p__Halobacteriota;c__Halobacteria;o__Halobacteriales;f__Natrialbaceae;g__Natribaculum;s__Natribaculum breve	Natribaculum longum	Archaea;Euryarchaeota;Stenosarchaea group	TRM20345	SAMN27400812	PRJNA824295	Complete	4.39468	64.1049	chromosome:NZ_CP095394.1/CP095394.1; plasmid unnamed1:NZ_CP095395.1/CP095395.1; plasmid unnamed2:NZ_CP095396.1/CP095396.1		3	4189	2022-04-16T00:00:00Z	ftp://ftp.ncbi.nlm.nih.gov/genomes/all/GCA/023/008/565/GCA_023008565.1_ASM2300856v1	ftp://ftp.ncbi.nlm.nih.gov/genomes/all/GCF/023/008/565/GCF_023008565.1_ASM2300856v1
GCA_023008585.1	d__Archaea;p__Halobacteriota;c__Halobacteria;o__Halobacteriales;f__Natrialbaceae;g__Natribaculum;s__Natribaculum breve	Natribaculum breve	Archaea;Euryarchaeota;Stenosarchaea group	TRM20010	SAMN27400664	PRJNA824286	Complete	4.35251	63.6796	chromosome:NZ_CP095390.1/CP095390.1; plasmid unnamed1:NZ_CP095391.1/CP095391.1; plasmid unnamed2:NZ_CP095392.1/CP095392.1; plasmid unnamed3:NZ_CP095393.1/CP095393.1		4	4146	2022-04-16T00:00:00Z	ftp://ftp.ncbi.nlm.nih.gov/genomes/all/GCA/023/008/585/GCA_023008585.1_ASM2300858v1	ftp://ftp.ncbi.nlm.nih.gov/genomes/all/GCF/023/008/585/GCF_023008585.1_ASM2300858v1
GCA_004209855.1	d__Archaea;p__Halobacteriota;c__Halobacteria;o__Halobacteriales;f__Natrialbaceae;g__Natrinema;s__Natrinema altunense	Natrinema altunense	Archaea;Euryarchaeota;Stenosarchaea group	4.1R	SAMN10643274	PRJNA511745	Scaffold	3.66608	64.9		SHMR01	12	3556	2019-02-19T00:00:00Z	ftp://ftp.ncbi.nlm.nih.gov/genomes/all/GCA/004/209/855/GCA_004209855.1_ASM420985v1	ftp://ftp.ncbi.nlm.nih.gov/genomes/all/GCF/004/209/855/GCF_004209855.1_ASM420985v1
GCA_017352095.1	d__Archaea;p__Halobacteriota;c__Halobacteria;o__Halobacteriales;f__Natrialbaceae;g__Natrinema;s__Natrinema ejinorense	Haloterrigena longa	Archaea;Euryarchaeota;Stenosarchaea group	ABH32	SAMN18137902	PRJNA706550	Complete	3.58887	64.4	chromosome:NZ_CP071463.1/CP071463.1		1	3475	2021-03-14T00:00:00Z	ftp://ftp.ncbi.nlm.nih.gov/genomes/all/GCA/017/352/095/GCA_017352095.1_ASM1735209v1	ftp://ftp.ncbi.nlm.nih.gov/genomes/all/GCF/017/352/095/GCF_017352095.1_ASM1735209v1
GCA_020105915.1	d__Archaea;p__Halobacteriota;c__Halobacteria;o__Halobacteriales;f__Natrialbaceae;g__Natrinema;s__Natrinema ejinorense	Haloterrigena longa	Archaea;Euryarchaeota;Stenosarchaea group	JCM 13563	SAMN20093900	PRJNA744492	Scaffold	4.12534	63.8		JAHUQE01	6	3901	2021-09-23T00:00:00Z	ftp://ftp.ncbi.nlm.nih.gov/genomes/all/GCA/020/105/915/GCA_020105915.1_ASM2010591v1	ftp://ftp.ncbi.nlm.nih.gov/genomes/all/GCF/020/105/915/GCF_020105915.1_ASM2010591v1
GCA_000281695.1	d__Archaea;p__Halobacteriota;c__Halobacteria;o__Halobacteriales;f__Natrialbaceae;g__Natrinema;s__Natrinema gari	Natrinema sp. J7-2	Archaea;Euryarchaeota;Stenosarchaea group	J7-2	SAMN02603638	PRJNA89473	Complete	3.79361	64.0583	chromosome:NC_018224.1/CP003412.1; plasmid pJ7-1:NC_018225.1/CP003413.1		2	3641	2012-07-25T00:00:00Z	ftp://ftp.ncbi.nlm.nih.gov/genomes/all/GCA/000/281/695/GCA_000281695.1_ASM28169v1	ftp://ftp.ncbi.nlm.nih.gov/genomes/all/GCF/000/281/695/GCF_000281695.1_ASM28169v1
GCA_013402815.2	d__Archaea;p__Halobacteriota;c__Halobacteria;o__Halobacteriales;f__Natrialbaceae;g__Natrinema;s__Natrinema halophilum	Natrinema halophilum	Archaea;Euryarchaeota;Stenosarchaea group	YPL8	SAMN15423737	PRJNA643691	Complete	4.84219	60.1155	chromosome:NZ_CP058601.1/CP058601.1; plasmid unnamed1:NZ_CP084880.1/CP084880.1; plasmid unnamed2:NZ_CP084881.1/CP084881.1		3	4452	2020-07-12T00:00:00Z	ftp://ftp.ncbi.nlm.nih.gov/genomes/all/GCA/013/402/815/GCA_013402815.2_ASM1340281v2	ftp://ftp.ncbi.nlm.nih.gov/genomes/all/GCF/013/402/815/GCF_013402815.2_ASM1340281v2
GCA_900101245.1	d__Archaea;p__Halobacteriota;c__Halobacteria;o__Halobacteriales;f__Natrialbaceae;g__Natrinema;s__Natrinema hispanicum_A	Haloterrigena hispanica	Archaea;Euryarchaeota;Stenosarchaea group	CDM_1	SAMN05192552	PRJEB15722	Scaffold	3.91427	61		FMZP01	135	3838	2016-10-20T00:00:00Z	ftp://ftp.ncbi.nlm.nih.gov/genomes/all/GCA/900/101/245/GCA_900101245.1_IMG-taxon_2651869596_annotated_assembly	ftp://ftp.ncbi.nlm.nih.gov/genomes/all/GCF/900/101/245/GCF_900101245.1_IMG-taxon_2651869596_annotated_assembly
GCA_900111485.1	d__Archaea;p__Halobacteriota;c__Halobacteria;o__Halobacteriales;f__Natrialbaceae;g__Natrinema;s__Natrinema hispanicum_A	Haloterrigena hispanica	Archaea;Euryarchaeota;Stenosarchaea group	CDM_6	SAMN04488694	PRJEB17032	Scaffold	3.96348	61		FOIC01	92	3840	2016-10-29T00:00:00Z	ftp://ftp.ncbi.nlm.nih.gov/genomes/all/GCA/900/111/485/GCA_900111485.1_IMG-taxon_2642422550_annotated_assembly	ftp://ftp.ncbi.nlm.nih.gov/genomes/all/GCF/900/111/485/GCF_900111485.1_IMG-taxon_2642422550_annotated_assembly
GCA_000690595.2	d__Archaea;p__Halobacteriota;c__Halobacteria;o__Halobacteriales;f__Natrialbaceae;g__Natrinema;s__Natrinema mahii	Haloterrigena mahii	Archaea;Euryarchaeota;Stenosarchaea group	H13	SAMN02390968	PRJNA227069	Scaffold	3.79434	65.1		JHUT02	24	3791	2014-05-13T00:00:00Z	ftp://ftp.ncbi.nlm.nih.gov/genomes/all/GCA/000/690/595/GCA_000690595.2_ASM69059v2	ftp://ftp.ncbi.nlm.nih.gov/genomes/all/GCF/000/690/595/GCF_000690595.1_ASM69059v2
GCA_005890195.1	d__Archaea;p__Halobacteriota;c__Halobacteria;o__Halobacteriales;f__Natrialbaceae;g__Natrinema;s__Natrinema pallidum	Natrinema pallidum	Archaea;Euryarchaeota;Stenosarchaea group	BOL6-1	SAMN11840646	PRJNA412908	Complete	3.77809	64.3079	chromosome:NZ_CP040637.1/CP040637.1; plasmid pNPA70:NZ_CP040639.1/CP040639.1; plasmid pNPA200:NZ_CP040638.1/CP040638.1		3	3685	2019-05-30T00:00:00Z	ftp://ftp.ncbi.nlm.nih.gov/genomes/all/GCA/005/890/195/GCA_005890195.1_ASM589019v1	ftp://ftp.ncbi.nlm.nih.gov/genomes/all/GCF/005/890/195/GCF_005890195.1_ASM589019v1
GCA_000230735.3	d__Archaea;p__Halobacteriota;c__Halobacteria;o__Halobacteriales;f__Natrialbaceae;g__Natrinema;s__Natrinema pellirubrum	Natrinema pellirubrum DSM 15624	Archaea;Euryarchaeota;Stenosarchaea group	DSM 15624	SAMN02261373	PRJNA52951	Complete	4.3541	63.9597	chromosome:NC_019962.1/CP003372.1; plasmid pNATPE01:NC_019967.1/CP003373.1; plasmid pNATPE02:NC_019963.1/CP003374.1		3	4140	2012-12-27T00:00:00Z	ftp://ftp.ncbi.nlm.nih.gov/genomes/all/GCA/000/230/735/GCA_000230735.3_ASM23073v3	ftp://ftp.ncbi.nlm.nih.gov/genomes/all/GCF/000/230/735/GCF_000230735.2_ASM23073v3
GCA_900110865.1	d__Archaea;p__Halobacteriota;c__Halobacteria;o__Halobacteriales;f__Natrialbaceae;g__Natrinema;s__Natrinema salaciae	Natrinema salaciae	Archaea;Euryarchaeota;Stenosarchaea group	DSM 25055	SAMN04489841	PRJEB16981	Scaffold	4.85702	65		FOFD01	11	4649	2016-10-29T00:00:00Z	ftp://ftp.ncbi.nlm.nih.gov/genomes/all/GCA/900/110/865/GCA_900110865.1_IMG-taxon_2639762573_annotated_assembly	ftp://ftp.ncbi.nlm.nih.gov/genomes/all/GCF/900/110/865/GCF_900110865.1_IMG-taxon_2639762573_annotated_assembly
GCA_900110455.1	d__Archaea;p__Halobacteriota;c__Halobacteria;o__Halobacteriales;f__Natrialbaceae;g__Natrinema;s__Natrinema salifodinae	Halopiger salifodinae	Archaea;Euryarchaeota;Stenosarchaea group	CGMCC 1.12284	SAMN05216285	PRJEB16954	Scaffold	4.27217	65.4		FOIS01	8	4018	2016-10-29T00:00:00Z	ftp://ftp.ncbi.nlm.nih.gov/genomes/all/GCA/900/110/455/GCA_900110455.1_IMG-taxon_2671180170_annotated_assembly	ftp://ftp.ncbi.nlm.nih.gov/genomes/all/GCF/900/110/455/GCF_900110455.1_IMG-taxon_2671180170_annotated_assembly
GCA_000784335.1	d__Archaea;p__Halobacteriota;c__Halobacteria;o__Halobacteriales;f__Natrialbaceae;g__Natrinema;s__Natrinema salifodinae	Halopiger salifodinae	Archaea;Euryarchaeota;Stenosarchaea group	KCY07-B2	SAMN03077632	PRJNA261874	Scaffold	4.3509	65.4		JROF01	81	4101	2014-11-17T00:00:00Z	ftp://ftp.ncbi.nlm.nih.gov/genomes/all/GCA/000/784/335/GCA_000784335.1_ASM78433v1	ftp://ftp.ncbi.nlm.nih.gov/genomes/all/GCF/000/784/335/GCF_000784335.1_ASM78433v1
GCA_020405205.1	d__Archaea;p__Halobacteriota;c__Halobacteria;o__Halobacteriales;f__Natrialbaceae;g__Natrinema;s__Natrinema salinisoli	Natrinema salinisoli	Archaea;Euryarchaeota;Stenosarchaea group	SLN56	SAMN21621845	PRJNA766180	Complete	4.7042	63.1222	chromosome:NZ_CP084469.1/CP084469.1; plasmid unnamed1:NZ_CP084470.1/CP084470.1; plasmid unnamed2:NZ_CP084471.1/CP084471.1		3	4519	2021-10-10T00:00:00Z	ftp://ftp.ncbi.nlm.nih.gov/genomes/all/GCA/020/405/205/GCA_020405205.1_ASM2040520v1	ftp://ftp.ncbi.nlm.nih.gov/genomes/all/GCF/020/405/205/GCF_020405205.1_ASM2040520v1
GCA_013456555.2	d__Archaea;p__Halobacteriota;c__Halobacteria;o__Halobacteriales;f__Natrialbaceae;g__Natrinema;s__Natrinema sp013456555	Natrinema sp. YPL30	Archaea;Euryarchaeota;Stenosarchaea group	YPL30	SAMN15423708	PRJNA643686	Complete	5.33631	61.4877	chromosome:NZ_CP059154.1/CP059154.1; plasmid unnamed1:NZ_CP084882.1/CP084882.1; plasmid unnamed2:NZ_CP084883.1/CP084883.1; plasmid unnamed3:NZ_CP084884.1/CP084884.1; plasmid unnamed4:NZ_CP084885.1/CP084885.1		5	4986	2020-07-22T00:00:00Z	ftp://ftp.ncbi.nlm.nih.gov/genomes/all/GCA/013/456/555/GCA_013456555.2_ASM1345655v2	ftp://ftp.ncbi.nlm.nih.gov/genomes/all/GCF/013/456/555/GCF_013456555.2_ASM1345655v2
GCA_019879105.1	d__Archaea;p__Halobacteriota;c__Halobacteria;o__Halobacteriales;f__Natrialbaceae;g__Natrinema;s__Natrinema sp019879105	Natrinema sp. SYSU A 869	Archaea;Euryarchaeota;Stenosarchaea group	SYSU A 869	SAMN20924712	PRJNA756716	Complete	5.67467	61.1428	chromosome:NZ_CP082249.1/CP082249.1; plasmid unnamed1:NZ_CP082247.1/CP082247.1; plasmid unnamed2:NZ_CP082248.1/CP082248.1		3	4784	2021-09-04T00:00:00Z	ftp://ftp.ncbi.nlm.nih.gov/genomes/all/GCA/019/879/105/GCA_019879105.1_ASM1987910v1	ftp://ftp.ncbi.nlm.nih.gov/genomes/all/GCF/019/879/105/GCF_019879105.1_ASM1987910v1
GCA_020405225.1	d__Archaea;p__Halobacteriota;c__Halobacteria;o__Halobacteriales;f__Natrialbaceae;g__Natrinema;s__Natrinema sp020405225	Natrinema sp. DC36	Archaea;Euryarchaeota;Stenosarchaea group	DC36	SAMN21849512	PRJNA766499	Complete	5.09732	62.0708	chromosome:NZ_CP084472.1/CP084472.1; plasmid unnamed1:NZ_CP084473.1/CP084473.1; plasmid unnamed2:NZ_CP084474.1/CP084474.1; plasmid unnamed3:NZ_CP084475.1/CP084475.1; plasmid unnamed4:NZ_CP084476.1/CP084476.1; plasmid unnamed5:NZ_CP084477.1/CP084477.1; plasmid unnamed6:NZ_CP084478.1/CP084478.1		7	5056	2021-10-10T00:00:00Z	ftp://ftp.ncbi.nlm.nih.gov/genomes/all/GCA/020/405/225/GCA_020405225.1_ASM2040522v1	ftp://ftp.ncbi.nlm.nih.gov/genomes/all/GCF/020/405/225/GCF_020405225.1_ASM2040522v1
GCA_024227435.1	d__Archaea;p__Halobacteriota;c__Halobacteria;o__Halobacteriales;f__Natrialbaceae;g__Natrinema;s__Natrinema sp024227435	Haloterrigena sp. ZJ2	Archaea;Euryarchaeota;Stenosarchaea group	ZJ2	SAMN29416498	PRJNA853933	Complete	4.77136	63.0237	chromosome:CP100445.1; plasmid unnamed1:CP100446.1; plasmid unnamed2:CP100447.1		3	0	2022-07-13T00:00:00Z		ftp://ftp.ncbi.nlm.nih.gov/genomes/all/GCF/024/227/435/GCF_024227435.1_ASM2422743v1
GCA_024266705.1	d__Archaea;p__Halobacteriota;c__Halobacteria;o__Halobacteriales;f__Natrialbaceae;g__Natrinema;s__Natrinema sp024266705	Haloterrigena sp. BND6	Archaea;Euryarchaeota;Stenosarchaea group	BND6	SAMN29416696	PRJNA853941	Complete	5.44358	60.9347	chromosome:CP100756.1; plasmid unnamed1:CP100757.1; plasmid unnamed2:CP100758.1		3	0	2022-07-14T00:00:00Z		ftp://ftp.ncbi.nlm.nih.gov/genomes/all/GCF/024/266/705/GCF_024266705.1_ASM2426670v1
GCA_024296685.1	d__Archaea;p__Halobacteriota;c__Halobacteria;o__Halobacteriales;f__Natrialbaceae;g__Natrinema;s__Natrinema sp024296685	Haloterrigena sp. DT87	Archaea;Euryarchaeota;Stenosarchaea group	DT87	SAMN29426053	PRJNA854279	Complete	3.766	65.5	chromosome:NZ_CP100763.1/CP100763.1		1	3660	2022-07-17T00:00:00Z		ftp://ftp.ncbi.nlm.nih.gov/genomes/all/GCF/024/296/685/GCF_024296685.1_ASM2429668v1
GCA_005576615.1	d__Archaea;p__Halobacteriota;c__Halobacteria;o__Halobacteriales;f__Natrialbaceae;g__Natrinema;s__Natrinema versiforme_A	Natrinema versiforme	Archaea;Euryarchaeota;Stenosarchaea group	BOL5-4	SAMN11637627	PRJNA412908	Complete	4.67447	63.3971	chromosome:NZ_CP040330.1/CP040330.1; plasmid pNVE2:NZ_CP040329.1/CP040329.1; plasmid pNVE19:NZ_CP040333.1/CP040333.1; plasmid pNVE414:NZ_CP040332.1/CP040332.1; plasmid pNVE500:NZ_CP040331.1/CP040331.1		5	4432	2019-05-22T00:00:00Z	ftp://ftp.ncbi.nlm.nih.gov/genomes/all/GCA/005/576/615/GCA_005576615.1_ASM557661v1	ftp://ftp.ncbi.nlm.nih.gov/genomes/all/GCF/005/576/615/GCF_005576615.1_ASM557661v1
GCA_000230715.3	d__Archaea;p__Halobacteriota;c__Halobacteria;o__Halobacteriales;f__Natrialbaceae;g__Natronobacterium;s__Natronobacterium gregoryi	Natronobacterium gregoryi SP2	Archaea;Euryarchaeota;Stenosarchaea group	SP2	SAMN02232042	PRJNA60135	Complete	3.78836	62.2	chromosome:NC_019792.1/CP003377.1		1	3565	2012-12-10T00:00:00Z	ftp://ftp.ncbi.nlm.nih.gov/genomes/all/GCA/000/230/715/GCA_000230715.3_ASM23071v3	ftp://ftp.ncbi.nlm.nih.gov/genomes/all/GCF/000/230/715/GCF_000230715.2_ASM23071v3
GCA_012163165.1	d__Archaea;p__Halobacteriota;c__Halobacteria;o__Halobacteriales;f__Natrialbaceae;g__Natronococcus;s__Natronococcus jeotgali	Natronococcus sp. JC468	Archaea;Euryarchaeota;Stenosarchaea group	JC468	SAMN13876162	PRJNA601866	Scaffold	4.05165	65.5		JAAVUO01	120	3816	2020-04-07T00:00:00Z	ftp://ftp.ncbi.nlm.nih.gov/genomes/all/GCA/012/163/165/GCA_012163165.1_ASM1216316v1	ftp://ftp.ncbi.nlm.nih.gov/genomes/all/GCF/012/163/165/GCF_012163165.1_ASM1216316v1
GCA_000328685.1	d__Archaea;p__Halobacteriota;c__Halobacteria;o__Halobacteriales;f__Natrialbaceae;g__Natronococcus;s__Natronococcus occultus	Natronococcus occultus SP4	Archaea;Euryarchaeota;Stenosarchaea group	SP4	SAMN02261263	PRJNA46985	Complete	4.31412	64.6294	chromosome:NC_019974.1/CP003929.1; plasmid 1:NC_019975.1/CP003930.1; plasmid 2:NC_019976.1/CP003931.1		3	4181	2012-12-28T00:00:00Z	ftp://ftp.ncbi.nlm.nih.gov/genomes/all/GCA/000/328/685/GCA_000328685.1_ASM32868v1	ftp://ftp.ncbi.nlm.nih.gov/genomes/all/GCF/000/328/685/GCF_000328685.1_ASM32868v1
GCA_023913515.1	d__Archaea;p__Halobacteriota;c__Halobacteria;o__Halobacteriales;f__Natrialbaceae;g__Natronococcus;s__Natronococcus sp023913515	Natronococcus sp. CG52	Archaea;Euryarchaeota;Stenosarchaea group	CG52	SAMN28928661	PRJNA847329	Complete	4.74342	63.4668	chromosome:NZ_CP099391.1/CP099391.1; plasmid unnamed1:NZ_CP099392.1/CP099392.1; plasmid unnamed2:NZ_CP099393.1/CP099393.1		3	4388	2022-06-26T00:00:00Z	ftp://ftp.ncbi.nlm.nih.gov/genomes/all/GCA/023/913/515/GCA_023913515.1_ASM2391351v1	ftp://ftp.ncbi.nlm.nih.gov/genomes/all/GCF/023/913/515/GCF_023913515.1_ASM2391351v1
GCA_009392895.1	d__Archaea;p__Halobacteriota;c__Halobacteria;o__Halobacteriales;f__Natrialbaceae;g__Natronorubrum;s__Natronorubrum aibiense	Natronorubrum aibiense	Archaea;Euryarchaeota;Stenosarchaea group	44745	SAMN13053294	PRJNA578237	Complete	4.34848	61.3132	chromosome:NZ_CP045488.1/CP045488.1; plasmid unnamed1:NZ_CP045489.1/CP045489.1; plasmid unnamed2:NZ_CP045490.1/CP045490.1; plasmid unnamed3:NZ_CP045491.1/CP045491.1		4	4084	2019-10-30T00:00:00Z	ftp://ftp.ncbi.nlm.nih.gov/genomes/all/GCA/009/392/895/GCA_009392895.1_ASM939289v1	ftp://ftp.ncbi.nlm.nih.gov/genomes/all/GCF/009/392/895/GCF_009392895.1_ASM939289v1
GCA_004799645.1	d__Archaea;p__Halobacteriota;c__Halobacteria;o__Halobacteriales;f__Natrialbaceae;g__Natronorubrum;s__Natronorubrum bangense	Natronorubrum bangense	Archaea;Euryarchaeota;Stenosarchaea group	JCM 10635	SAMN09711300	PRJNA482706	Complete	4.38241	60.6075	chromosome:NZ_CP031305.1/CP031305.1; plasmid unnamed1:NZ_CP031306.1/CP031306.1; plasmid unnamed2:NZ_CP031307.1/CP031307.1; plasmid unnamed3:NZ_CP031308.1/CP031308.1; plasmid unnamed4:NZ_CP031309.1/CP031309.1		5	4157	2019-04-18T00:00:00Z	ftp://ftp.ncbi.nlm.nih.gov/genomes/all/GCA/004/799/645/GCA_004799645.1_ASM479964v1	ftp://ftp.ncbi.nlm.nih.gov/genomes/all/GCF/004/799/645/GCF_004799645.1_ASM479964v1
GCA_009834785.1	d__Archaea;p__Halobacteriota;c__Halobacteria;o__Halobacteriales;f__Natrialbaceae;g__Natronorubrum;s__Natronorubrum halalkaliphilum	Natronorubrum halalkaliphilum	Archaea;Euryarchaeota;Stenosarchaea group	JWXQ-INN-674	SAMN13632791	PRJNA494838	Scaffold	4.55677	62.5		WUYX01	73	4124	2020-01-08T00:00:00Z	ftp://ftp.ncbi.nlm.nih.gov/genomes/all/GCA/009/834/785/GCA_009834785.1_ASM983478v1	ftp://ftp.ncbi.nlm.nih.gov/genomes/all/GCF/009/834/785/GCF_009834785.1_ASM983478v1
GCA_005239425.1	d__Archaea;p__Halobacteriota;c__Halobacteria;o__Halobacteriales;f__Natrialbaceae;g__Natronorubrum;s__Natronorubrum halophilum	Natronorubrum halophilum	Archaea;Euryarchaeota;Stenosarchaea group	NEN6	SAMN11155595	PRJNA527621	Scaffold	4.74282	63		SZNO01	9	4446	2019-04-30T00:00:00Z	ftp://ftp.ncbi.nlm.nih.gov/genomes/all/GCA/005/239/425/GCA_005239425.1_ASM523942v1	ftp://ftp.ncbi.nlm.nih.gov/genomes/all/GCF/005/239/425/GCF_005239425.1_ASM523942v1
GCA_900108095.1	d__Archaea;p__Halobacteriota;c__Halobacteria;o__Halobacteriales;f__Natrialbaceae;g__Natronorubrum;s__Natronorubrum sediminis	Natronorubrum sediminis	Archaea;Euryarchaeota;Stenosarchaea group	CGMCC 1.8981	SAMN04487967	PRJEB16711	Scaffold	3.78254	61.1		FNWL01	6	3541	2016-10-27T00:00:00Z	ftp://ftp.ncbi.nlm.nih.gov/genomes/all/GCA/900/108/095/GCA_900108095.1_IMG-taxon_2617270925_annotated_assembly	ftp://ftp.ncbi.nlm.nih.gov/genomes/all/GCF/900/108/095/GCF_900108095.1_IMG-taxon_2617270925_annotated_assembly
GCA_900156475.1	d__Archaea;p__Halobacteriota;c__Halobacteria;o__Halobacteriales;f__Natrialbaceae;g__Natronorubrum;s__Natronorubrum thiooxidans	Natronorubrum thiooxidans	Archaea;Euryarchaeota;Stenosarchaea group	type strain: HArc-	SAMN05421752	PRJEB18902	Scaffold	4.20979	60.9		FTNR01	62	3999	2017-01-14T00:00:00Z	ftp://ftp.ncbi.nlm.nih.gov/genomes/all/GCA/900/156/475/GCA_900156475.1_IMG-taxon_2681812919_annotated_assembly	ftp://ftp.ncbi.nlm.nih.gov/genomes/all/GCF/900/156/475/GCF_900156475.1_IMG-taxon_2681812919_annotated_assembly
GCA_000383975.1	d__Archaea;p__Halobacteriota;c__Halobacteria;o__Halobacteriales;f__Natrialbaceae;g__Natronorubrum;s__Natronorubrum tibetense	Natronorubrum tibetense GA33	Archaea;Euryarchaeota;Stenosarchaea group	GA33	SAMN02261315	PRJNA85145	Scaffold	4.93484	62.3		ARPH01	5	4561	2013-04-25T00:00:00Z	ftp://ftp.ncbi.nlm.nih.gov/genomes/all/GCA/000/383/975/GCA_000383975.1_ASM38397v1	ftp://ftp.ncbi.nlm.nih.gov/genomes/all/GCF/000/383/975/GCF_000383975.1_ASM38397v1
GCA_006543045.1	d__Archaea;p__Halobacteriota;c__Halobacteria;o__Halobacteriales;f__Natrialbaceae;g__Salinadaptatus;s__Salinadaptatus halalkaliphilus	Salinadaptatus halalkaliphilus	Archaea;Euryarchaeota;Stenosarchaea group	XQ-INN 246	SAMN10181221	PRJNA494838	Scaffold	4.52154	62.1		RBZW01	77	4265	2019-04-19T00:00:00Z	ftp://ftp.ncbi.nlm.nih.gov/genomes/all/GCA/006/543/045/GCA_006543045.1_ASM654304v1	ftp://ftp.ncbi.nlm.nih.gov/genomes/all/GCF/006/543/045/GCF_006543045.1_ASM654304v1
GCA_024138145.1	d__Archaea;p__Halobacteriota;c__Halobacteria;o__Halobacteriales;f__Natrialbaceae;g__Tc-Br11;s__Tc-Br11 sp024138145	Halovivax sp. AGai3-5	Archaea;Euryarchaeota;Stenosarchaea group	AGai3-5	SAMN29188008	PRJNA850544	Complete	3.8546	63.0635	chromosome:NZ_CP099997.1/CP099997.1; plasmid unnamed1:NZ_CP099998.1/CP099998.1; plasmid unnamed2:NZ_CP099999.1/CP099999.1		3	3609	2022-07-05T00:00:00Z		ftp://ftp.ncbi.nlm.nih.gov/genomes/all/GCF/024/138/145/GCF_024138145.1_ASM2413814v1
GCA_024204665.1	d__Archaea;p__Halobacteriota;c__Halobacteria;o__Halobacteriales;f__Natrialbaceae;g__Tc-Br11;s__Tc-Br11 sp024204665	Saliphagus sp. WLHS1	Archaea;Euryarchaeota;Stenosarchaea group	WLHS1	SAMN29198663	PRJNA850622	Complete	4.31216	62.9932	chromosome:NZ_CP100355.1/CP100355.1; plasmid unnamed1:NZ_CP100356.1/CP100356.1; plasmid unnamed2:NZ_CP100357.1/CP100357.1; plasmid unnamed3:NZ_CP100358.1/CP100358.1		4	4062	2022-07-11T00:00:00Z		ftp://ftp.ncbi.nlm.nih.gov/genomes/all/GCF/024/204/665/GCF_024204665.1_ASM2420466v1
GCA_024298845.1	d__Archaea;p__Halobacteriota;c__Halobacteria;o__Halobacteriales;f__Natrialbaceae;g__Tc-Br11;s__Tc-Br11 sp024298845	Saliphagus sp. WLHSJ1	Archaea;Euryarchaeota;Stenosarchaea group	WLHSJ1	SAMN29498734	PRJNA855601	Complete	4.21755	59.4903	chromosome:NZ_CP101156.1/CP101156.1; plasmid unnamed1:NZ_CP101157.1/CP101157.1; plasmid unnamed2:NZ_CP101158.1/CP101158.1; plasmid unnamed3:NZ_CP101159.1/CP101159.1; plasmid unnamed4:NZ_CP101160.1/CP101160.1		5	3789	2022-07-18T00:00:00Z		ftp://ftp.ncbi.nlm.nih.gov/genomes/all/GCF/024/298/845/GCF_024298845.1_ASM2429884v1
GCA_023638055.1	d__Archaea;p__Halobacteriota;c__Halobacteria;o__Halobacteriales;f__Natronoarchaeaceae;g__Natronoarchaeum;s__Natronoarchaeum aerophilus	Natranaeroarchaeum aerophilus	Archaea;Euryarchaeota;Stenosarchaea group	AArc-St1-1	SAMN25827068	PRJNA807104	Scaffold	3.28972	61		JAKRVY01	32	3287	2022-06-02T00:00:00Z	ftp://ftp.ncbi.nlm.nih.gov/genomes/all/GCA/023/638/055/GCA_023638055.1_ASM2363805v1	ftp://ftp.ncbi.nlm.nih.gov/genomes/all/GCF/023/638/055/GCF_023638055.1_ASM2363805v1
GCA_017094485.1	d__Archaea;p__Halobacteriota;c__Halobacteria;o__Halobacteriales;f__Natronoarchaeaceae;g__Natronoarchaeum;s__Natronoarchaeum sulfidigenes	Natranaeroarchaeum sulfidigenum	Archaea;Euryarchaeota;Stenosarchaea group	AArc-S	SAMN16483868	PRJNA670096	Complete	3.04113	60.8	chromosome:NZ_CP064786.1/CP064786.1		1	3079	2021-03-01T00:00:00Z	ftp://ftp.ncbi.nlm.nih.gov/genomes/all/GCA/017/094/485/GCA_017094485.1_ASM1709448v1	ftp://ftp.ncbi.nlm.nih.gov/genomes/all/GCF/017/094/485/GCF_017094485.1_ASM1709448v1
GCA_003675875.1	d__Archaea;p__Halobacteriota;c__Halobacteria;o__Halobacteriales;f__QS-9-68-17;g__Halostella;s__Halostella limicola	Halostella limicola	Archaea;Euryarchaeota;Stenosarchaea group	LT12	SAMN10187727	PRJNA494990	Scaffold	4.11701	67.2		RCDI01	9	4098	2018-10-22T00:00:00Z	ftp://ftp.ncbi.nlm.nih.gov/genomes/all/GCA/003/675/875/GCA_003675875.1_ASM367587v1	ftp://ftp.ncbi.nlm.nih.gov/genomes/all/GCF/003/675/875/GCF_003675875.1_ASM367587v1
GCA_003023565.1	d__Archaea;p__Halobacteriota;c__Halobacteria;o__Halobacteriales;f__QS-9-68-17;g__Halostella;s__Halostella sp003023565	Halobacteriales archaeon QS_9_68_17	Archaea;Euryarchaeota;Stenosarchaea group	QS_9_68_17	SAMN06020791	PRJNA351262	Scaffold	2.88259	68.1		PXSA01	42	2689	2018-03-27T00:00:00Z	ftp://ftp.ncbi.nlm.nih.gov/genomes/all/GCA/003/023/565/GCA_003023565.1_ASM302356v1
GCA_023204835.1	d__Archaea;p__Halobacteriota;c__Halobacteria;o__Halobacteriales;f__Salinarchaeaceae;g__Salinarchaeum;s__Salinarchaeum laminariae	Salinarchaeum laminariae	Archaea;Euryarchaeota;Stenosarchaea group	R26	SAMN27573327	PRJNA826649	Chromosome	3.16963	64.9	chromosome:NZ_CP096270.1/CP096270.1		1	2948	2022-05-02T00:00:00Z	ftp://ftp.ncbi.nlm.nih.gov/genomes/all/GCA/023/204/835/GCA_023204835.1_ASM2320483v1	ftp://ftp.ncbi.nlm.nih.gov/genomes/all/GCF/023/204/835/GCF_023204835.1_ASM2320483v1
GCA_000403645.1	d__Archaea;p__Halobacteriota;c__Halobacteria;o__Halobacteriales;f__Salinarchaeaceae;g__Salinarchaeum;s__Salinarchaeum sp000403645	Salinarchaeum sp. Harcht-Bsk1	Archaea;Euryarchaeota;Stenosarchaea group	Harcht-Bsk1	SAMN02602994	PRJNA202311	Complete	3.25526	66.6	chromosome:NC_021313.1/CP005962.1		1	3029	2013-05-30T00:00:00Z	ftp://ftp.ncbi.nlm.nih.gov/genomes/all/GCA/000/403/645/GCA_000403645.1_ASM40364v1	ftp://ftp.ncbi.nlm.nih.gov/genomes/all/GCF/000/403/645/GCF_000403645.1_ASM40364v1
GCA_019693215.1	d__Archaea;p__Halobacteriota;c__Halobacteria;o__Halobacteriales;f__Salinarchaeaceae;g__Salinarchaeum;s__Salinarchaeum sp019693215	Salinarchaeum sp. IM2453	Archaea;Euryarchaeota;Stenosarchaea group	IM2453	SAMN20424635	PRJNA749895	Complete	2.65668	47.4	chromosome:NZ_CP081183.1/CP081183.1		1	2419	2021-08-19T00:00:00Z	ftp://ftp.ncbi.nlm.nih.gov/genomes/all/GCA/019/693/215/GCA_019693215.1_ASM1969321v1	ftp://ftp.ncbi.nlm.nih.gov/genomes/all/GCF/019/693/215/GCF_019693215.1_ASM1969321v1
GCA_003022785.1	d__Archaea;p__Halobacteriota;c__Halobacteria;o__Halobacteriales;f__SW-7-71-33;g__;s__	Halobacteriales archaeon SW_7_68_16	Archaea;Euryarchaeota;Stenosarchaea group	SW_7_68_16	SAMN06020805	PRJNA351262	Scaffold	1.90369	68		PXSO01	105	1822	2018-03-27T00:00:00Z	ftp://ftp.ncbi.nlm.nih.gov/genomes/all/GCA/003/022/785/GCA_003022785.1_ASM302278v1
GCA_003022865.1	d__Archaea;p__Halobacteriota;c__Halobacteria;o__Halobacteriales;f__SW-7-71-33;g__SW-7-71-33;s__SW-7-71-33 sp003022865	Halobacteriales archaeon SW_5_70_135	Archaea;Euryarchaeota;Stenosarchaea group	SW_5_70_135	SAMN06020801	PRJNA351262	Scaffold	1.77446	70.5		PXSK01	43	1597	2018-03-27T00:00:00Z	ftp://ftp.ncbi.nlm.nih.gov/genomes/all/GCA/003/022/865/GCA_003022865.1_ASM302286v1
GCA_003022885.1	d__Archaea;p__Halobacteriota;c__Halobacteria;o__Halobacteriales;f__SW-7-71-33;g__SW-7-71-33;s__SW-7-71-33 sp003022865	Halobacteriales archaeon SW_12_71_31	Archaea;Euryarchaeota;Stenosarchaea group	SW_12_71_31	SAMN06020798	PRJNA351262	Scaffold	0.947951	70.9		PXSH01	115	874	2018-03-27T00:00:00Z	ftp://ftp.ncbi.nlm.nih.gov/genomes/all/GCA/003/022/885/GCA_003022885.1_ASM302288v1
GCA_003023195.1	d__Archaea;p__Halobacteriota;c__Halobacteria;o__Halobacteriales;f__SW-7-71-33;g__SW-7-71-33;s__SW-7-71-33 sp003023195	Halobacteriales archaeon QS_8_69_26	Archaea;Euryarchaeota;Stenosarchaea group	QS_8_69_26	SAMN06020788	PRJNA351262	Scaffold	3.29164	69.4		PXRX01	46	2923	2018-03-27T00:00:00Z	ftp://ftp.ncbi.nlm.nih.gov/genomes/all/GCA/003/023/195/GCA_003023195.1_ASM302319v1
GCA_002496675.1	d__Archaea;p__Halobacteriota;c__Halobacteria;o__Halobacteriales;f__UBA12382;g__UBA12382;s__UBA12382 sp002503845	Euryarchaeota archaeon UBA67	Archaea;Euryarchaeota;unclassified Euryarchaeota	UBA67	SAMN06027272	PRJNA348753	Scaffold	1.14123	41.3		DAKZ01	29	0	2017-10-10T00:00:00Z	ftp://ftp.ncbi.nlm.nih.gov/genomes/all/GCA/002/496/675/GCA_002496675.1_ASM249667v1
GCA_002496825.1	d__Archaea;p__Halobacteriota;c__Halobacteria;o__Halobacteriales;f__UBA12382;g__UBA12382;s__UBA12382 sp002503845	Euryarchaeota archaeon UBA198	Archaea;Euryarchaeota;unclassified Euryarchaeota	UBA198	SAMN06027262	PRJNA348753	Scaffold	1.12355	41.4		DALP01	16	0	2017-10-10T00:00:00Z	ftp://ftp.ncbi.nlm.nih.gov/genomes/all/GCA/002/496/825/GCA_002496825.1_ASM249682v1
GCA_002503845.1	d__Archaea;p__Halobacteriota;c__Halobacteria;o__Halobacteriales;f__UBA12382;g__UBA12382;s__UBA12382 sp002503845	Euryarchaeota archaeon UBA24	Archaea;Euryarchaeota;unclassified Euryarchaeota	UBA24	SAMN06027177	PRJNA348753	Scaffold	1.1301	41.4		DASO01	16	0	2017-10-10T00:00:00Z	ftp://ftp.ncbi.nlm.nih.gov/genomes/all/GCA/002/503/845/GCA_002503845.1_ASM250384v1
GCA_013330985.1	d__Archaea;p__Halobacteriota;c__Halobacteria;o__Halobacteriales;f__UBA12382;g__UBA12382;s__UBA12382 sp002503845	Halobacteriales archaeon	Archaea;Euryarchaeota;Stenosarchaea group	UBA11879	SAMN13192984	PRJNA593905	Scaffold	0.894474	41.3		DUHI01	144	1001	2020-06-11T00:00:00Z	ftp://ftp.ncbi.nlm.nih.gov/genomes/all/GCA/013/330/985/GCA_013330985.1_ASM1333098v1
GCA_013330005.1	d__Archaea;p__Halobacteriota;c__Halobacteria;o__Halobacteriales;f__UBA12382;g__UBA12382;s__UBA12382 sp002503845	Halobacteriales archaeon	Archaea;Euryarchaeota;Stenosarchaea group	UBA8589	SAMN13193031	PRJNA593905	Scaffold	0.761354	41.2		DUJD01	151	861	2020-06-11T00:00:00Z	ftp://ftp.ncbi.nlm.nih.gov/genomes/all/GCA/013/330/005/GCA_013330005.1_ASM1333000v1
GCA_022450005.1	d__Archaea;p__Halobacteriota;c__Halobacteria;o__Halobacteriales;f__UBA12382;g__UBA12382;s__UBA12382 sp022450005	Halobacteriales archaeon	Archaea;Euryarchaeota;Stenosarchaea group	ALOHA_A2.5_47	SAMN25999085	PRJNA352737	Scaffold	1.01319	41.5		JAKURE01	79	1080	2022-03-02T00:00:00Z	ftp://ftp.ncbi.nlm.nih.gov/genomes/all/GCA/022/450/005/GCA_022450005.1_ASM2245000v1
GCA_000063445.1	d__Archaea;p__Halobacteriota;c__Methanocellia;o__Methanocellales;f__Methanocellaceae;g__Methanocella_A;s__Methanocella_A arvoryzae	Methanocella arvoryzae MRE50	Archaea;Euryarchaeota;Stenosarchaea group	MRE50	SAMEA3138262	PRJNA19641	Complete	3.17992	54.6	chromosome:NC_009464.1/AM114193.2		1	3099	2006-07-21T00:00:00Z	ftp://ftp.ncbi.nlm.nih.gov/genomes/all/GCA/000/063/445/GCA_000063445.1_ASM6344v1	ftp://ftp.ncbi.nlm.nih.gov/genomes/all/GCF/000/063/445/GCF_000063445.1_ASM6344v1
GCA_000251105.1	d__Archaea;p__Halobacteriota;c__Methanocellia;o__Methanocellales;f__Methanocellaceae;g__Methanocella;s__Methanocella conradii	Methanocella conradii HZ254	Archaea;Euryarchaeota;Stenosarchaea group	HZ254	SAMN02603117	PRJNA73221	Complete	2.37844	52.7	chromosome:NC_017034.1/CP003243.1		1	2487	2012-03-07T00:00:00Z	ftp://ftp.ncbi.nlm.nih.gov/genomes/all/GCA/000/251/105/GCA_000251105.1_ASM25110v1	ftp://ftp.ncbi.nlm.nih.gov/genomes/all/GCF/000/251/105/GCF_000251105.1_ASM25110v1
GCA_000011005.1	d__Archaea;p__Halobacteriota;c__Methanocellia;o__Methanocellales;f__Methanocellaceae;g__Methanocella;s__Methanocella paludicola	Methanocella paludicola SANAE	Archaea;Euryarchaeota;Stenosarchaea group	SANAE	SAMD00060931	PRJDA20361	Complete	2.95763	54.9	chromosome:NC_013665.1/AP011532.1		1	3012	2009-12-25T23:03:00Z	ftp://ftp.ncbi.nlm.nih.gov/genomes/all/GCA/000/011/005/GCA_000011005.1_ASM1100v1	ftp://ftp.ncbi.nlm.nih.gov/genomes/all/GCF/000/011/005/GCF_000011005.1_ASM1100v1
GCA_013329575.1	d__Archaea;p__Halobacteriota;c__Methanoliparia;o__Methanoliparales;f__Methanoliparaceae;g__Methanoliparum;s__Methanoliparum sp8915u	Halobacteria archaeon	Archaea;Euryarchaeota;Stenosarchaea group	UBA8915	SAMN13193051	PRJNA593905	Scaffold	1.2431	37.5		DUJX01	162	1324	2020-06-11T00:00:00Z	ftp://ftp.ncbi.nlm.nih.gov/genomes/all/GCA/013/329/575/GCA_013329575.1_ASM1332957v1
GCA_013331365.1	d__Archaea;p__Halobacteriota;c__Methanoliparia;o__Methanoliparales;f__Methanoliparaceae;g__Methanoliparum;s__Methanoliparum sp8915u	Halobacteria archaeon	Archaea;Euryarchaeota;Stenosarchaea group	UBA10521	SAMN13192962	PRJNA593905	Scaffold	0.758925	37.3		DUGM01	136	841	2020-06-11T00:00:00Z	ftp://ftp.ncbi.nlm.nih.gov/genomes/all/GCA/013/331/365/GCA_013331365.1_ASM1333136v1
GCA_902158745.1	d__Archaea;p__Halobacteriota;c__Methanoliparia;o__Methanoliparales;f__Methanoliparaceae;g__Methanolliviera;s__Methanolliviera sp902158745	Candidatus Methanolliviera sp. GoM_asphalt	Archaea;Euryarchaeota;Candidatus Methanoliparia	gfbio:mag-sample-1:67c8463b-6cbd-4d56-a398-d795175a9500	SAMEA5756323	PRJEB32776	Scaffold	1.75387	42.7		CABGHH01	270	1927	2019-07-15T00:00:00Z	ftp://ftp.ncbi.nlm.nih.gov/genomes/all/GCA/902/158/745/GCA_902158745.1_MASP	ftp://ftp.ncbi.nlm.nih.gov/genomes/all/GCF/902/158/745/GCF_902158745.1_MASP
GCA_018132105.1	d__Archaea;p__Halobacteriota;c__Methanomicrobia;o__Methanomicrobiales;f__Methanocorpusculaceae;g__Methanocalculus;s__Methanocalculus chunghsingensis	Methanocalculus chunghsingensis	Archaea;Euryarchaeota;Stenosarchaea group	K1F9705b	SAMN03254652	PRJNA269564	Scaffold	2.13455	52.2		JWHL01	51	2167	2021-04-22T00:00:00Z	ftp://ftp.ncbi.nlm.nih.gov/genomes/all/GCA/018/132/105/GCA_018132105.1_ASM1813210v1	ftp://ftp.ncbi.nlm.nih.gov/genomes/all/GCF/018/132/105/GCF_018132105.1_ASM1813210v1
GCA_001508695.1	d__Archaea;p__Halobacteriota;c__Methanomicrobia;o__Methanomicrobiales;f__Methanocorpusculaceae;g__Methanocalculus;s__Methanocalculus sp9912u	Methanomicrobiales archaeon 53_19	Archaea;Euryarchaeota;Stenosarchaea group	53_19	SAMN03445186	PRJNA278302	Scaffold	2.62923	52.5		LGHF01	286	2864	2016-01-08T00:00:00Z	ftp://ftp.ncbi.nlm.nih.gov/genomes/all/GCA/001/508/695/GCA_001508695.1_ASM150869v1
GCA_011620885.1	d__Archaea;p__Halobacteriota;c__Methanomicrobia;o__Methanomicrobiales;f__Methanocorpusculaceae;g__Methanocalculus;s__Methanocalculus sp9912u	Methanocorpusculaceae archaeon	Archaea;Euryarchaeota;Stenosarchaea group	WOFA02	SAMN13475793	PRJNA592873	Scaffold	1.86154	52.1		WOYK01	45	0	2020-03-23T00:00:00Z	ftp://ftp.ncbi.nlm.nih.gov/genomes/all/GCA/011/620/885/GCA_011620885.1_ASM1162088v1
GCA_013329165.1	d__Archaea;p__Halobacteriota;c__Methanomicrobia;o__Methanomicrobiales;f__Methanocorpusculaceae;g__Methanocalculus;s__Methanocalculus sp9912u	Methanocalculus sp.	Archaea;Euryarchaeota;Stenosarchaea group	UBA9912	SAMN13193075	PRJNA593905	Scaffold	1.9324	51.6		DUKV01	72	2052	2020-06-11T00:00:00Z	ftp://ftp.ncbi.nlm.nih.gov/genomes/all/GCA/013/329/165/GCA_013329165.1_ASM1332916v1
GCA_000015765.1	d__Archaea;p__Halobacteriota;c__Methanomicrobia;o__Methanomicrobiales;f__Methanocorpusculaceae;g__Methanocorpusculum;s__Methanocorpusculum labreanum	Methanocorpusculum labreanum Z	Archaea;Euryarchaeota;Stenosarchaea group	Z	SAMN00623052	PRJNA18109	Complete	1.80496	50	chromosome:NC_008942.1/CP000559.1		1	1795	2007-02-01T00:00:00Z	ftp://ftp.ncbi.nlm.nih.gov/genomes/all/GCA/000/015/765/GCA_000015765.1_ASM1576v1	ftp://ftp.ncbi.nlm.nih.gov/genomes/all/GCF/000/015/765/GCF_000015765.1_ASM1576v1
GCA_000430905.1	d__Archaea;p__Halobacteriota;c__Methanomicrobia;o__Methanomicrobiales;f__Methanocorpusculaceae;g__Methanocorpusculum;s__Methanocorpusculum parvum	Methanocorpusculum bavaricum DSM 4179	Archaea;Euryarchaeota;Stenosarchaea group	DSM 4179	SAMN02441137	PRJNA188868	Scaffold	1.70678	51.4		AUMX01	27	1699	2013-07-15T00:00:00Z	ftp://ftp.ncbi.nlm.nih.gov/genomes/all/GCA/000/430/905/GCA_000430905.1_ASM43090v1	ftp://ftp.ncbi.nlm.nih.gov/genomes/all/GCF/000/430/905/GCF_000430905.1_ASM43090v1
GCA_015063085.1	d__Archaea;p__Halobacteriota;c__Methanomicrobia;o__Methanomicrobiales;f__Methanocorpusculaceae;g__Methanocorpusculum;s__Methanocorpusculum parvum_A	Methanocorpusculum parvum	Archaea;Euryarchaeota;Stenosarchaea group	SIG11	SAMN11294296	PRJNA530070	Scaffold	1.40175	48.6		SUTD01	36	1475	2020-10-28T00:00:00Z	ftp://ftp.ncbi.nlm.nih.gov/genomes/all/GCA/015/063/085/GCA_015063085.1_ASM1506308v1
GCA_001940805.1	d__Archaea;p__Halobacteriota;c__Methanomicrobia;o__Methanomicrobiales;f__Methanocorpusculaceae;g__Methanocorpusculum;s__Methanocorpusculum sp001940805	Methanocorpusculaceae archaeon Phil4	Archaea;Euryarchaeota;Stenosarchaea group	Phil4	SAMN06140811	PRJNA357304	Scaffold	1.96533	52.8		MSGU01	102	0	2017-01-10T00:00:00Z	ftp://ftp.ncbi.nlm.nih.gov/genomes/all/GCA/001/940/805/GCA_001940805.1_ASM194080v1
GCA_002498375.1	d__Archaea;p__Halobacteriota;c__Methanomicrobia;o__Methanomicrobiales;f__Methanocorpusculaceae;g__Methanocorpusculum;s__Methanocorpusculum sp002498375	Methanocorpusculum sp. UBA424	Archaea;Euryarchaeota;Stenosarchaea group	UBA424	SAMN06027378	PRJNA348753	Scaffold	1.5618	50.9		DAHC01	15	0	2017-10-10T00:00:00Z	ftp://ftp.ncbi.nlm.nih.gov/genomes/all/GCA/002/498/375/GCA_002498375.1_ASM249837v1
GCA_002498705.1	d__Archaea;p__Halobacteriota;c__Methanomicrobia;o__Methanomicrobiales;f__Methanocorpusculaceae;g__Methanocorpusculum;s__Methanocorpusculum sp002498375	Methanocorpusculum sp. UBA362	Archaea;Euryarchaeota;Stenosarchaea group	UBA362	SAMN06027076	PRJNA348753	Scaffold	1.60406	50.4		DAIH01	28	0	2017-10-10T00:00:00Z	ftp://ftp.ncbi.nlm.nih.gov/genomes/all/GCA/002/498/705/GCA_002498705.1_ASM249870v1
GCA_002497725.1	d__Archaea;p__Halobacteriota;c__Methanomicrobia;o__Methanomicrobiales;f__Methanocorpusculaceae;g__Methanocorpusculum;s__Methanocorpusculum sp002498375	Methanocorpusculum sp. UBA592	Archaea;Euryarchaeota;Stenosarchaea group	UBA592	SAMN06027511	PRJNA348753	Scaffold	1.39863	49.8		DAER01	124	0	2017-10-10T00:00:00Z	ftp://ftp.ncbi.nlm.nih.gov/genomes/all/GCA/002/497/725/GCA_002497725.1_ASM249772v1
GCA_002506085.1	d__Archaea;p__Halobacteriota;c__Methanomicrobia;o__Methanomicrobiales;f__Methanocorpusculaceae;g__Methanocorpusculum;s__Methanocorpusculum sp002506085	Methanocorpusculaceae archaeon UBA425	Archaea;Euryarchaeota;Stenosarchaea group	UBA425	SAMN06027379	PRJNA348753	Scaffold	1.81088	47.8		DAWV01	28	0	2017-10-10T00:00:00Z	ftp://ftp.ncbi.nlm.nih.gov/genomes/all/GCA/002/506/085/GCA_002506085.1_ASM250608v1
GCA_001602685.1	d__Archaea;p__Halobacteriota;c__Methanomicrobia;o__Methanomicrobiales;f__Methanocorpusculaceae;g__Methanocorpusculum;s__Methanocorpusculum sp003315675	Methanomicrobiales archaeon Methan_05	Archaea;Euryarchaeota;Stenosarchaea group	Methan_05	SAMN03837487	PRJNA284316	Scaffold	1.84465	52.5		LUYI01	386	0	2016-03-30T00:00:00Z	ftp://ftp.ncbi.nlm.nih.gov/genomes/all/GCA/001/602/685/GCA_001602685.1_ASM160268v1
GCA_015063105.1	d__Archaea;p__Halobacteriota;c__Methanomicrobia;o__Methanomicrobiales;f__Methanocorpusculaceae;g__Methanocorpusculum;s__Methanocorpusculum sp017408885	Methanocorpusculum parvum	Archaea;Euryarchaeota;Stenosarchaea group	SIG10	SAMN11294295	PRJNA530070	Scaffold	1.42321	46.6		SUTC01	36	1492	2020-10-28T00:00:00Z	ftp://ftp.ncbi.nlm.nih.gov/genomes/all/GCA/015/063/105/GCA_015063105.1_ASM1506310v1
GCA_004102725.1	d__Archaea;p__Halobacteriota;c__Methanomicrobia;o__Methanomicrobiales;f__Methanoculleaceae;g__Methanoculleus_A;s__Methanoculleus_A taiwanensis	Methanoculleus taiwanensis	Archaea;Euryarchaeota;Stenosarchaea group	CYW4	SAMN03856099	PRJNA289606	Scaffold	2.75072	60		LHQS01	12	2656	2019-01-22T00:00:00Z	ftp://ftp.ncbi.nlm.nih.gov/genomes/all/GCA/004/102/725/GCA_004102725.1_ASM410272v1	ftp://ftp.ncbi.nlm.nih.gov/genomes/all/GCF/004/102/725/GCF_004102725.1_ASM410272v1
GCA_019137145.1	d__Archaea;p__Halobacteriota;c__Methanomicrobia;o__Methanomicrobiales;f__Methanoculleaceae;g__Methanoculleus;s__	Methanomicrobiales archaeon	Archaea;Euryarchaeota;Stenosarchaea group	THP_Bin_15	SAMN18201421	PRJNA703818	Scaffold	1.9367	60.3		JAGVSX01	251	0	2021-07-06T00:00:00Z	ftp://ftp.ncbi.nlm.nih.gov/genomes/all/GCA/019/137/145/GCA_019137145.1_ASM1913714v1
GCA_000304355.2	d__Archaea;p__Halobacteriota;c__Methanomicrobia;o__Methanomicrobiales;f__Methanoculleaceae;g__Methanoculleus;s__Methanoculleus bourgensis	Methanoculleus bourgensis MS2	Archaea;Euryarchaeota;Stenosarchaea group	MS2T	SAMEA2272323	PRJEB167	Complete	2.78977	60.6	chromosome I:NC_018227.2/HE964772.2		1	2584	2012-07-20T00:00:00Z	ftp://ftp.ncbi.nlm.nih.gov/genomes/all/GCA/000/304/355/GCA_000304355.2_Mb_MS2	ftp://ftp.ncbi.nlm.nih.gov/genomes/all/GCF/000/304/355/GCF_000304355.2_Mb_MS2
GCA_900036045.1	d__Archaea;p__Halobacteriota;c__Methanomicrobia;o__Methanomicrobiales;f__Methanoculleaceae;g__Methanoculleus;s__Methanoculleus bourgensis	Methanoculleus bourgensis	Archaea;Euryarchaeota;Stenosarchaea group	Methanoculleus sp MAB1	SAMEA3857231	PRJEB12532	Complete	2.8593	60.3	chromosome 1:NZ_LT158599.1/LT158599.1		1	2592	2016-02-15T00:00:00Z	ftp://ftp.ncbi.nlm.nih.gov/genomes/all/GCA/900/036/045/GCA_900036045.1_Methanoculleus_sp_MAB1	ftp://ftp.ncbi.nlm.nih.gov/genomes/all/GCF/900/036/045/GCF_900036045.1_Methanoculleus_sp_MAB1
GCA_900079125.1	d__Archaea;p__Halobacteriota;c__Methanomicrobia;o__Methanomicrobiales;f__Methanoculleaceae;g__Methanoculleus;s__Methanoculleus bourgensis	Methanoculleus bourgensis	Archaea;Euryarchaeota;Stenosarchaea group	BA1	SAMEA3921042	PRJEB13327	Complete	2.55119	60.9	chromosome I:LT549891.1		1	2528	2016-05-05T00:00:00Z	ftp://ftp.ncbi.nlm.nih.gov/genomes/all/GCA/900/079/125/GCA_900079125.1_MBBA	ftp://ftp.ncbi.nlm.nih.gov/genomes/all/GCF/900/079/125/GCF_900079125.1_MBBA
GCA_002502935.1	d__Archaea;p__Halobacteriota;c__Methanomicrobia;o__Methanomicrobiales;f__Methanoculleaceae;g__Methanoculleus;s__Methanoculleus bourgensis	Methanoculleus sp. UBA413	Archaea;Euryarchaeota;Stenosarchaea group	UBA413	SAMN06027371	PRJNA348753	Scaffold	2.34804	59.8		DAQR01	141	0	2017-10-10T00:00:00Z	ftp://ftp.ncbi.nlm.nih.gov/genomes/all/GCA/002/502/935/GCA_002502935.1_ASM250293v1
GCA_002499165.1	d__Archaea;p__Halobacteriota;c__Methanomicrobia;o__Methanomicrobiales;f__Methanoculleaceae;g__Methanoculleus;s__Methanoculleus bourgensis	Methanoculleus sp. UBA326	Archaea;Euryarchaeota;Stenosarchaea group	UBA326	SAMN06027029	PRJNA348753	Scaffold	2.44262	58.9		DAKO01	152	0	2017-10-10T00:00:00Z	ftp://ftp.ncbi.nlm.nih.gov/genomes/all/GCA/002/499/165/GCA_002499165.1_ASM249916v1
GCA_019669965.1	d__Archaea;p__Halobacteriota;c__Methanomicrobia;o__Methanomicrobiales;f__Methanoculleaceae;g__Methanoculleus;s__Methanoculleus chikugoensis	Methanoculleus chikugoensis	Archaea;Euryarchaeota;Stenosarchaea group	MG62	SAMD00171896	PRJDB8303	Complete	2.62226	61.9	chromosome:NZ_AP019781.1/AP019781.1		1	2567	2021-06-02T00:00:00Z	ftp://ftp.ncbi.nlm.nih.gov/genomes/all/GCA/019/669/965/GCA_019669965.1_ASM1966996v1	ftp://ftp.ncbi.nlm.nih.gov/genomes/all/GCF/019/669/965/GCF_019669965.1_ASM1966996v1
GCA_000015825.1	d__Archaea;p__Halobacteriota;c__Methanomicrobia;o__Methanomicrobiales;f__Methanoculleaceae;g__Methanoculleus;s__Methanoculleus marisnigri	Methanoculleus marisnigri JR1	Archaea;Euryarchaeota;Stenosarchaea group	JR1	SAMN02598365	PRJNA16330	Complete	2.4781	62.1	chromosome:NC_009051.1/CP000562.1		1	2447	2007-02-16T00:00:00Z	ftp://ftp.ncbi.nlm.nih.gov/genomes/all/GCA/000/015/825/GCA_000015825.1_ASM1582v1	ftp://ftp.ncbi.nlm.nih.gov/genomes/all/GCF/000/015/825/GCF_000015825.1_ASM1582v1
GCA_002503885.1	d__Archaea;p__Halobacteriota;c__Methanomicrobia;o__Methanomicrobiales;f__Methanoculleaceae;g__Methanoculleus;s__Methanoculleus marisnigri_B	Methanoculleus marisnigri	Archaea;Euryarchaeota;Stenosarchaea group	UBA468	SAMN06027135	PRJNA348753	Scaffold	2.58204	61.5		DASQ01	152	0	2017-10-10T00:00:00Z	ftp://ftp.ncbi.nlm.nih.gov/genomes/all/GCA/002/503/885/GCA_002503885.1_ASM250388v1
GCA_002496255.1	d__Archaea;p__Halobacteriota;c__Methanomicrobia;o__Methanomicrobiales;f__Methanoculleaceae;g__Methanoculleus;s__Methanoculleus marisnigri_B	Methanoculleus marisnigri	Archaea;Euryarchaeota;Stenosarchaea group	UBA478	SAMN06027610	PRJNA348753	Scaffold	2.26595	61.8		DAJB01	267	0	2017-10-10T00:00:00Z	ftp://ftp.ncbi.nlm.nih.gov/genomes/all/GCA/002/496/255/GCA_002496255.1_ASM249625v1
GCA_002503525.1	d__Archaea;p__Halobacteriota;c__Methanomicrobia;o__Methanomicrobiales;f__Methanoculleaceae;g__Methanoculleus;s__Methanoculleus marisnigri_B	Methanoculleus marisnigri	Archaea;Euryarchaeota;Stenosarchaea group	UBA535	SAMN06027052	PRJNA348753	Scaffold	2.37433	61.5		DARX01	278	0	2017-10-10T00:00:00Z	ftp://ftp.ncbi.nlm.nih.gov/genomes/all/GCA/002/503/525/GCA_002503525.1_ASM250352v1
GCA_001508665.1	d__Archaea;p__Halobacteriota;c__Methanomicrobia;o__Methanomicrobiales;f__Methanoculleaceae;g__Methanoculleus;s__Methanoculleus marisnigri_B	Methanoculleus marisnigri	Archaea;Euryarchaeota;Stenosarchaea group	63_41	SAMN03445185	PRJNA278302	Scaffold	1.82596	62.1		LGHE01	342	2106	2016-01-08T00:00:00Z	ftp://ftp.ncbi.nlm.nih.gov/genomes/all/GCA/001/508/665/GCA_001508665.1_ASM150866v1
GCA_011620795.1	d__Archaea;p__Halobacteriota;c__Methanomicrobia;o__Methanomicrobiales;f__Methanoculleaceae;g__Methanoculleus;s__Methanoculleus marisnigri_B	Methanoculleus sp.	Archaea;Euryarchaeota;Stenosarchaea group	WOFA03	SAMN13475794	PRJNA592873	Scaffold	2.37364	62		WOYL01	219	0	2020-03-23T00:00:00Z	ftp://ftp.ncbi.nlm.nih.gov/genomes/all/GCA/011/620/795/GCA_011620795.1_ASM1162079v1
GCA_001017125.1	d__Archaea;p__Halobacteriota;c__Methanomicrobia;o__Methanomicrobiales;f__Methanoculleaceae;g__Methanoculleus;s__Methanoculleus sediminis	Methanoculleus sediminis	Archaea;Euryarchaeota;Stenosarchaea group	S3Fa	SAMN03288802	PRJNA273166	Scaffold	2.48972	62.3		JXOJ01	15	2445	2015-06-01T00:00:00Z	ftp://ftp.ncbi.nlm.nih.gov/genomes/all/GCA/001/017/125/GCA_001017125.1_ASM101712v1	ftp://ftp.ncbi.nlm.nih.gov/genomes/all/GCF/001/017/125/GCF_001017125.1_ASM101712v1
GCA_017994915.1	d__Archaea;p__Halobacteriota;c__Methanomicrobia;o__Methanomicrobiales;f__Methanoculleaceae;g__Methanoculleus;s__Methanoculleus sp001896715	Methanoculleus sp.	Archaea;Euryarchaeota;Stenosarchaea group	Go_SlDig_bin_367	SAMN18120020	PRJNA524094	Scaffold	2.3672	62.5		JAGOJX01	168	2318	2021-04-15T00:00:00Z	ftp://ftp.ncbi.nlm.nih.gov/genomes/all/GCA/017/994/915/GCA_017994915.1_ASM1799491v1
GCA_002497965.1	d__Archaea;p__Halobacteriota;c__Methanomicrobia;o__Methanomicrobiales;f__Methanoculleaceae;g__Methanoculleus;s__Methanoculleus sp002497965	Methanomicrobiaceae archaeon UBA436	Archaea;Euryarchaeota;Stenosarchaea group	UBA436	SAMN06027560	PRJNA348753	Scaffold	1.55511	59		DAFR01	165	0	2017-10-10T00:00:00Z	ftp://ftp.ncbi.nlm.nih.gov/genomes/all/GCA/002/497/965/GCA_002497965.1_ASM249796v1
GCA_022837745.1	d__Archaea;p__Halobacteriota;c__Methanomicrobia;o__Methanomicrobiales;f__Methanoculleaceae;g__Methanoculleus;s__Methanoculleus sp002497965	Methanomicrobiaceae archaeon	Archaea;Euryarchaeota;Stenosarchaea group	7-NCT_009	SAMN26856823	PRJNA818325	Scaffold	1.96105	59.3		JALHIW01	78	0	2022-04-08T00:00:00Z	ftp://ftp.ncbi.nlm.nih.gov/genomes/all/GCA/022/837/745/GCA_022837745.1_ASM2283774v1
GCA_022838325.1	d__Archaea;p__Halobacteriota;c__Methanomicrobia;o__Methanomicrobiales;f__Methanoculleaceae;g__Methanoculleus;s__Methanoculleus sp002497965	Methanomicrobiaceae archaeon	Archaea;Euryarchaeota;Stenosarchaea group	4-aug_S1_031	SAMN26856767	PRJNA818325	Scaffold	1.42482	59.9		JALHGS01	224	0	2022-04-08T00:00:00Z	ftp://ftp.ncbi.nlm.nih.gov/genomes/all/GCA/022/838/325/GCA_022838325.1_ASM2283832v1
GCA_022839005.1	d__Archaea;p__Halobacteriota;c__Methanomicrobia;o__Methanomicrobiales;f__Methanoculleaceae;g__Methanoculleus;s__Methanoculleus sp002497965	Methanomicrobiaceae archaeon	Archaea;Euryarchaeota;Stenosarchaea group	1-no_shock_S1_048	SAMN26856680	PRJNA818325	Scaffold	1.70967	59.8		JALHDJ01	313	0	2022-04-08T00:00:00Z	ftp://ftp.ncbi.nlm.nih.gov/genomes/all/GCA/022/839/005/GCA_022839005.1_ASM2283900v1
GCA_022840325.1	d__Archaea;p__Halobacteriota;c__Methanomicrobia;o__Methanomicrobiales;f__Methanoculleaceae;g__Methanoculleus;s__Methanoculleus sp002497965	Methanomicrobiaceae archaeon	Archaea;Euryarchaeota;Stenosarchaea group	5-aug_S3_027	SAMN26856804	PRJNA818325	Scaffold	1.61389	59.6		JALHID01	310	0	2022-04-08T00:00:00Z	ftp://ftp.ncbi.nlm.nih.gov/genomes/all/GCA/022/840/325/GCA_022840325.1_ASM2284032v1
GCA_022839115.1	d__Archaea;p__Halobacteriota;c__Methanomicrobia;o__Methanomicrobiales;f__Methanoculleaceae;g__Methanoculleus;s__Methanoculleus sp002497965	Methanomicrobiaceae archaeon	Archaea;Euryarchaeota;Stenosarchaea group	2-no_aug_S1_037	SAMN26856707	PRJNA818325	Scaffold	1.35598	59.9		JALHEK01	293	0	2022-04-08T00:00:00Z	ftp://ftp.ncbi.nlm.nih.gov/genomes/all/GCA/022/839/115/GCA_022839115.1_ASM2283911v1
GCA_022838645.1	d__Archaea;p__Halobacteriota;c__Methanomicrobia;o__Methanomicrobiales;f__Methanoculleaceae;g__Methanoculleus;s__Methanoculleus sp002497965	Methanomicrobiaceae archaeon	Archaea;Euryarchaeota;Stenosarchaea group	3-JJ_aug_S1_036	SAMN26856737	PRJNA818325	Scaffold	1.26762	59.9		JALHFO01	277	0	2022-04-08T00:00:00Z	ftp://ftp.ncbi.nlm.nih.gov/genomes/all/GCA/022/838/645/GCA_022838645.1_ASM2283864v1
GCA_022840425.1	d__Archaea;p__Halobacteriota;c__Methanomicrobia;o__Methanomicrobiales;f__Methanoculleaceae;g__Methanoculleus;s__Methanoculleus sp002497965	Methanomicrobiaceae archaeon	Archaea;Euryarchaeota;Stenosarchaea group	8-LJY_007	SAMN26856843	PRJNA818325	Scaffold	1.05818	59.4		JALHJQ01	412	0	2022-04-08T00:00:00Z	ftp://ftp.ncbi.nlm.nih.gov/genomes/all/GCA/022/840/425/GCA_022840425.1_ASM2284042v1
GCA_018053465.1	d__Archaea;p__Halobacteriota;c__Methanomicrobia;o__Methanomicrobiales;f__Methanoculleaceae;g__Methanoculleus;s__Methanoculleus sp002497965	Methanoculleus sp.	Archaea;Euryarchaeota;Stenosarchaea group	Gw_SlDig_bin_32	SAMN18120718	PRJNA524094	Scaffold	1.40617	59.9		JAGPLI01	132	1477	2021-04-17T00:00:00Z	ftp://ftp.ncbi.nlm.nih.gov/genomes/all/GCA/018/053/465/GCA_018053465.1_ASM1805346v1
GCA_017996475.1	d__Archaea;p__Halobacteriota;c__Methanomicrobia;o__Methanomicrobiales;f__Methanoculleaceae;g__Methanoculleus;s__Methanoculleus sp002497965	Methanoculleus sp.	Archaea;Euryarchaeota;Stenosarchaea group	Go_SlDig_bin_296	SAMN18120006	PRJNA524094	Scaffold	1.32522	59.5		JAGOGW01	250	1434	2021-04-15T00:00:00Z	ftp://ftp.ncbi.nlm.nih.gov/genomes/all/GCA/017/996/475/GCA_017996475.1_ASM1799647v1
GCA_013329555.1	d__Archaea;p__Halobacteriota;c__Methanomicrobia;o__Methanomicrobiales;f__Methanoculleaceae;g__Methanoculleus;s__Methanoculleus sp002497965	Methanoculleus sp.	Archaea;Euryarchaeota;Stenosarchaea group	UBA8928	SAMN13193052	PRJNA593905	Scaffold	1.01106	59.4		DUJY01	168	991	2020-06-11T00:00:00Z	ftp://ftp.ncbi.nlm.nih.gov/genomes/all/GCA/013/329/555/GCA_013329555.1_ASM1332955v1
GCA_002498065.1	d__Archaea;p__Halobacteriota;c__Methanomicrobia;o__Methanomicrobiales;f__Methanoculleaceae;g__Methanoculleus;s__Methanoculleus sp002498065	Methanoculleus sp. UBA208	Archaea;Euryarchaeota;Stenosarchaea group	UBA208	SAMN06027575	PRJNA348753	Scaffold	2.4087	61.9		DAFZ01	121	0	2017-10-10T00:00:00Z	ftp://ftp.ncbi.nlm.nih.gov/genomes/all/GCA/002/498/065/GCA_002498065.1_ASM249806v1
GCA_002499455.1	d__Archaea;p__Halobacteriota;c__Methanomicrobia;o__Methanomicrobiales;f__Methanoculleaceae;g__Methanoculleus;s__Methanoculleus sp002499455	Methanoculleus sp. UBA77	Archaea;Euryarchaeota;Stenosarchaea group	UBA77	SAMN06027464	PRJNA348753	Scaffold	2.30897	62.9		DALN01	180	0	2017-10-10T00:00:00Z	ftp://ftp.ncbi.nlm.nih.gov/genomes/all/GCA/002/499/455/GCA_002499455.1_ASM249945v1
GCA_002501655.1	d__Archaea;p__Halobacteriota;c__Methanomicrobia;o__Methanomicrobiales;f__Methanoculleaceae;g__Methanoculleus;s__Methanoculleus sp002501655	Methanoculleus sp. UBA303	Archaea;Euryarchaeota;Stenosarchaea group	UBA303	SAMN06027359	PRJNA348753	Scaffold	2.66992	60.7		DANY01	55	0	2017-10-10T00:00:00Z	ftp://ftp.ncbi.nlm.nih.gov/genomes/all/GCA/002/501/655/GCA_002501655.1_ASM250165v1
GCA_002506585.1	d__Archaea;p__Halobacteriota;c__Methanomicrobia;o__Methanomicrobiales;f__Methanoculleaceae;g__Methanoculleus;s__Methanoculleus sp002506585	Methanoculleus sp. UBA430	Archaea;Euryarchaeota;Stenosarchaea group	UBA430	SAMN06027562	PRJNA348753	Scaffold	2.72109	61.9		DAXW01	16	0	2017-10-10T00:00:00Z	ftp://ftp.ncbi.nlm.nih.gov/genomes/all/GCA/002/506/585/GCA_002506585.1_ASM250658v1
GCA_002508665.1	d__Archaea;p__Halobacteriota;c__Methanomicrobia;o__Methanomicrobiales;f__Methanoculleaceae;g__Methanoculleus;s__Methanoculleus sp002508705	Methanoculleus sp. UBA416	Archaea;Euryarchaeota;Stenosarchaea group	UBA416	SAMN06027283	PRJNA348753	Scaffold	2.68848	60.2		DAIY01	41	0	2017-10-11T00:00:00Z	ftp://ftp.ncbi.nlm.nih.gov/genomes/all/GCA/002/508/665/GCA_002508665.1_ASM250866v1
GCA_002508705.1	d__Archaea;p__Halobacteriota;c__Methanomicrobia;o__Methanomicrobiales;f__Methanoculleaceae;g__Methanoculleus;s__Methanoculleus sp002508705	Methanoculleus sp. UBA374	Archaea;Euryarchaeota;Stenosarchaea group	UBA374	SAMN06027555	PRJNA348753	Scaffold	2.80178	60.1		DAYL01	36	0	2017-10-11T00:00:00Z	ftp://ftp.ncbi.nlm.nih.gov/genomes/all/GCA/002/508/705/GCA_002508705.1_ASM250870v1
GCA_002499755.1	d__Archaea;p__Halobacteriota;c__Methanomicrobia;o__Methanomicrobiales;f__Methanoculleaceae;g__Methanoculleus;s__Methanoculleus sp002508705	Methanoculleus sp. UBA291	Archaea;Euryarchaeota;Stenosarchaea group	UBA291	SAMN06027250	PRJNA348753	Scaffold	2.82792	60		DANC01	63	0	2017-10-10T00:00:00Z	ftp://ftp.ncbi.nlm.nih.gov/genomes/all/GCA/002/499/755/GCA_002499755.1_ASM249975v1
GCA_002509565.1	d__Archaea;p__Halobacteriota;c__Methanomicrobia;o__Methanomicrobiales;f__Methanoculleaceae;g__Methanoculleus;s__Methanoculleus sp002508705	Methanoculleus sp. UBA377	Archaea;Euryarchaeota;Stenosarchaea group	UBA377	SAMN06027554	PRJNA348753	Scaffold	2.65217	60		DAFM01	84	0	2017-10-11T00:00:00Z	ftp://ftp.ncbi.nlm.nih.gov/genomes/all/GCA/002/509/565/GCA_002509565.1_ASM250956v1
GCA_002508765.1	d__Archaea;p__Halobacteriota;c__Methanomicrobia;o__Methanomicrobiales;f__Methanoculleaceae;g__Methanoculleus;s__Methanoculleus sp002508705	Methanoculleus sp. UBA331	Archaea;Euryarchaeota;Stenosarchaea group	UBA331	SAMN06027491	PRJNA348753	Scaffold	2.67827	59.6		DAUJ01	90	0	2017-10-11T00:00:00Z	ftp://ftp.ncbi.nlm.nih.gov/genomes/all/GCA/002/508/765/GCA_002508765.1_ASM250876v1
GCA_002509545.1	d__Archaea;p__Halobacteriota;c__Methanomicrobia;o__Methanomicrobiales;f__Methanoculleaceae;g__Methanoculleus;s__Methanoculleus sp002508705	Methanoculleus sp. UBA45	Archaea;Euryarchaeota;Stenosarchaea group	UBA45	SAMN06027022	PRJNA348753	Scaffold	2.57017	60		DAVF01	101	0	2017-10-11T00:00:00Z	ftp://ftp.ncbi.nlm.nih.gov/genomes/all/GCA/002/509/545/GCA_002509545.1_ASM250954v1
GCA_002508805.1	d__Archaea;p__Halobacteriota;c__Methanomicrobia;o__Methanomicrobiales;f__Methanoculleaceae;g__Methanoculleus;s__Methanoculleus sp002508705	Methanoculleus sp. UBA300	Archaea;Euryarchaeota;Stenosarchaea group	UBA300	SAMN06027362	PRJNA348753	Scaffold	2.59534	59.7		DATG01	81	0	2017-10-11T00:00:00Z	ftp://ftp.ncbi.nlm.nih.gov/genomes/all/GCA/002/508/805/GCA_002508805.1_ASM250880v1
GCA_002508745.1	d__Archaea;p__Halobacteriota;c__Methanomicrobia;o__Methanomicrobiales;f__Methanoculleaceae;g__Methanoculleus;s__Methanoculleus sp002508705	Methanoculleus sp. UBA334	Archaea;Euryarchaeota;Stenosarchaea group	UBA334	SAMN06027486	PRJNA348753	Scaffold	2.65145	59.4		DASA01	73	0	2017-10-11T00:00:00Z	ftp://ftp.ncbi.nlm.nih.gov/genomes/all/GCA/002/508/745/GCA_002508745.1_ASM250874v1
GCA_002508725.1	d__Archaea;p__Halobacteriota;c__Methanomicrobia;o__Methanomicrobiales;f__Methanoculleaceae;g__Methanoculleus;s__Methanoculleus sp002508705	Methanoculleus sp. UBA340	Archaea;Euryarchaeota;Stenosarchaea group	UBA340	SAMN06027440	PRJNA348753	Scaffold	2.61705	59.5		DAWF01	82	0	2017-10-11T00:00:00Z	ftp://ftp.ncbi.nlm.nih.gov/genomes/all/GCA/002/508/725/GCA_002508725.1_ASM250872v1
GCA_002508775.1	d__Archaea;p__Halobacteriota;c__Methanomicrobia;o__Methanomicrobiales;f__Methanoculleaceae;g__Methanoculleus;s__Methanoculleus sp002508705	Methanoculleus sp. UBA312	Archaea;Euryarchaeota;Stenosarchaea group	UBA312	SAMN06027162	PRJNA348753	Scaffold	2.64005	59.7		DAFF01	113	0	2017-10-11T00:00:00Z	ftp://ftp.ncbi.nlm.nih.gov/genomes/all/GCA/002/508/775/GCA_002508775.1_ASM250877v1
GCA_002508675.1	d__Archaea;p__Halobacteriota;c__Methanomicrobia;o__Methanomicrobiales;f__Methanoculleaceae;g__Methanoculleus;s__Methanoculleus sp002508705	Methanoculleus sp. UBA389	Archaea;Euryarchaeota;Stenosarchaea group	UBA389	SAMN06027529	PRJNA348753	Scaffold	2.59213	59.3		DATR01	98	0	2017-10-11T00:00:00Z	ftp://ftp.ncbi.nlm.nih.gov/genomes/all/GCA/002/508/675/GCA_002508675.1_ASM250867v1
GCA_002498025.1	d__Archaea;p__Halobacteriota;c__Methanomicrobia;o__Methanomicrobiales;f__Methanoculleaceae;g__Methanoculleus;s__Methanoculleus sp002508705	Methanoculleus sp. UBA307	Archaea;Euryarchaeota;Stenosarchaea group	UBA307	SAMN06027355	PRJNA348753	Scaffold	2.55713	59.7		DAFT01	116	0	2017-10-10T00:00:00Z	ftp://ftp.ncbi.nlm.nih.gov/genomes/all/GCA/002/498/025/GCA_002498025.1_ASM249802v1
GCA_002496755.1	d__Archaea;p__Halobacteriota;c__Methanomicrobia;o__Methanomicrobiales;f__Methanoculleaceae;g__Methanoculleus;s__Methanoculleus sp002508705	Methanoculleus sp. UBA406	Archaea;Euryarchaeota;Stenosarchaea group	UBA406	SAMN06027097	PRJNA348753	Scaffold	2.52986	59.6		DALL01	121	0	2017-10-10T00:00:00Z	ftp://ftp.ncbi.nlm.nih.gov/genomes/all/GCA/002/496/755/GCA_002496755.1_ASM249675v1
GCA_002509575.1	d__Archaea;p__Halobacteriota;c__Methanomicrobia;o__Methanomicrobiales;f__Methanoculleaceae;g__Methanoculleus;s__Methanoculleus sp002508705	Methanoculleus sp. UBA320	Archaea;Euryarchaeota;Stenosarchaea group	UBA320	SAMN06027630	PRJNA348753	Scaffold	2.7442	58.9		DAPF01	194	0	2017-10-11T00:00:00Z	ftp://ftp.ncbi.nlm.nih.gov/genomes/all/GCA/002/509/575/GCA_002509575.1_ASM250957v1
GCA_002839575.1	d__Archaea;p__Halobacteriota;c__Methanomicrobia;o__Methanomicrobiales;f__Methanoculleaceae;g__Methanoculleus;s__Methanoculleus sp002839575	Methanomicrobiales archaeon HGW-Methanomicrobiales-6	Archaea;Euryarchaeota;Stenosarchaea group	HGW-Methanomicrobiales-6	SAMN06767740	PRJNA321556	Scaffold	2.54723	61.5		PGYH01	205	2528	2017-12-13T00:00:00Z	ftp://ftp.ncbi.nlm.nih.gov/genomes/all/GCA/002/839/575/GCA_002839575.1_ASM283957v1
GCA_002839645.1	d__Archaea;p__Halobacteriota;c__Methanomicrobia;o__Methanomicrobiales;f__Methanoculleaceae;g__Methanoculleus;s__Methanoculleus sp002839645	Methanomicrobiales archaeon HGW-Methanomicrobiales-2	Archaea;Euryarchaeota;Stenosarchaea group	HGW-Methanomicrobiales-2	SAMN06767736	PRJNA321556	Scaffold	2.78219	60.8		PGYL01	69	2624	2017-12-13T00:00:00Z	ftp://ftp.ncbi.nlm.nih.gov/genomes/all/GCA/002/839/645/GCA_002839645.1_ASM283964v1
GCA_016841385.1	d__Archaea;p__Halobacteriota;c__Methanomicrobia;o__Methanomicrobiales;f__Methanoculleaceae;g__Methanoculleus;s__Methanoculleus sp016841385	Euryarchaeota archaeon	Archaea;Euryarchaeota;unclassified Euryarchaeota	BL5_bin.18	SAMN14918448	PRJNA630030	Scaffold	2.16827	62.5		JAENZF01	260	0	2021-02-09T00:00:00Z	ftp://ftp.ncbi.nlm.nih.gov/genomes/all/GCA/016/841/385/GCA_016841385.1_ASM1684138v1
GCA_016841955.1	d__Archaea;p__Halobacteriota;c__Methanomicrobia;o__Methanomicrobiales;f__Methanoculleaceae;g__Methanoculleus;s__Methanoculleus sp016841955	Euryarchaeota archaeon	Archaea;Euryarchaeota;unclassified Euryarchaeota	B5_bin.3	SAMN14918421	PRJNA630030	Scaffold	2.43199	61.9		JAENYE01	9	0	2021-02-09T00:00:00Z	ftp://ftp.ncbi.nlm.nih.gov/genomes/all/GCA/016/841/955/GCA_016841955.1_ASM1684195v1
GCA_016841295.1	d__Archaea;p__Halobacteriota;c__Methanomicrobia;o__Methanomicrobiales;f__Methanoculleaceae;g__Methanoculleus;s__Methanoculleus sp016841955	Euryarchaeota archaeon	Archaea;Euryarchaeota;unclassified Euryarchaeota	BM5_bin.7	SAMN14918456	PRJNA630030	Scaffold	2.43253	61.9		JAENZM01	24	0	2021-02-09T00:00:00Z	ftp://ftp.ncbi.nlm.nih.gov/genomes/all/GCA/016/841/295/GCA_016841295.1_ASM1684129v1
GCA_019136335.1	d__Archaea;p__Halobacteriota;c__Methanomicrobia;o__Methanomicrobiales;f__Methanoculleaceae;g__Methanoculleus;s__Methanoculleus sp019136335	Methanomicrobiales archaeon	Archaea;Euryarchaeota;Stenosarchaea group	WAS_Bin_24	SAMN18201460	PRJNA703818	Scaffold	2.21743	63.8		JAGVUK01	326	0	2021-07-06T00:00:00Z	ftp://ftp.ncbi.nlm.nih.gov/genomes/all/GCA/019/136/335/GCA_019136335.1_ASM1913633v1
GCA_017997385.1	d__Archaea;p__Halobacteriota;c__Methanomicrobia;o__Methanomicrobiales;f__Methanoculleaceae;g__Methanoculleus;s__Methanoculleus sp019136335	Methanoculleus sp.	Archaea;Euryarchaeota;Stenosarchaea group	Go_SlDig_bin_474	SAMN18120061	PRJNA524094	Scaffold	2.22997	63.6		JAGOFD01	310	2337	2021-04-15T00:00:00Z	ftp://ftp.ncbi.nlm.nih.gov/genomes/all/GCA/017/997/385/GCA_017997385.1_ASM1799738v1
GCA_001512375.1	d__Archaea;p__Halobacteriota;c__Methanomicrobia;o__Methanomicrobiales;f__Methanoculleaceae;g__Methanoculleus;s__Methanoculleus thermohydrogenotrophicum	Candidatus Methanoculleus thermohydrogenotrophicum	Archaea;Euryarchaeota;Stenosarchaea group	DTU006	SAMN03776724	PRJNA283298	Scaffold	2.15317	59.2		LFRN01	287	0	2016-01-12T00:00:00Z	ftp://ftp.ncbi.nlm.nih.gov/genomes/all/GCA/001/512/375/GCA_001512375.1_ASM151237v1
GCA_900025055.1	d__Archaea;p__Halobacteriota;c__Methanomicrobia;o__Methanomicrobiales;f__Methanoculleaceae;g__Methanoculleus;s__Methanoculleus thermohydrogenotrophicum	uncultured Methanoculleus sp.	Archaea;Euryarchaeota;Stenosarchaea group		SAMEA3730009	PRJEB10932	Scaffold	2.20022	59.4		FIZL01	161	0	2016-02-12T00:00:00Z	ftp://ftp.ncbi.nlm.nih.gov/genomes/all/GCA/900/025/055/GCA_900025055.1_Methanoculleus_bin_genome
GCA_002503105.1	d__Archaea;p__Halobacteriota;c__Methanomicrobia;o__Methanomicrobiales;f__Methanoculleaceae;g__UBA206;s__UBA206 sp002503105	Methanomicrobiaceae archaeon UBA206	Archaea;Euryarchaeota;Stenosarchaea group	UBA206	SAMN06027567	PRJNA348753	Scaffold	1.61764	62.5		DAQY01	98	0	2017-10-10T00:00:00Z	ftp://ftp.ncbi.nlm.nih.gov/genomes/all/GCA/002/503/105/GCA_002503105.1_ASM250310v1
GCA_002502815.1	d__Archaea;p__Halobacteriota;c__Methanomicrobia;o__Methanomicrobiales;f__Methanoculleaceae;g__UBA207;s__UBA207 sp002503135	Methanomicrobiaceae archaeon UBA2	Archaea;Euryarchaeota;Stenosarchaea group	UBA2	SAMN06027406	PRJNA348753	Scaffold	1.2033	54.5		DAQH01	93	0	2017-10-10T00:00:00Z	ftp://ftp.ncbi.nlm.nih.gov/genomes/all/GCA/002/502/815/GCA_002502815.1_ASM250281v1
GCA_002503135.1	d__Archaea;p__Halobacteriota;c__Methanomicrobia;o__Methanomicrobiales;f__Methanoculleaceae;g__UBA207;s__UBA207 sp002503135	Methanomicrobiaceae archaeon UBA207	Archaea;Euryarchaeota;Stenosarchaea group	UBA207	SAMN06027568	PRJNA348753	Scaffold	1.28977	54		DARA01	77	0	2017-10-10T00:00:00Z	ftp://ftp.ncbi.nlm.nih.gov/genomes/all/GCA/002/503/135/GCA_002503135.1_ASM250313v1
GCA_019633745.1	d__Archaea;p__Halobacteriota;c__Methanomicrobia;o__Methanomicrobiales;f__Methanofollaceae;g__Methanofollis;s__Methanofollis formosanus	Methanofollis formosanus	Archaea;Euryarchaeota;Stenosarchaea group	ML15	SAMN11125589	PRJNA527005	Chromosome	2.96592	60.3	chromosome:NZ_CP037968.1/CP037968.1		1	2607	2021-08-16T00:00:00Z	ftp://ftp.ncbi.nlm.nih.gov/genomes/all/GCA/019/633/745/GCA_019633745.1_ASM1963374v1	ftp://ftp.ncbi.nlm.nih.gov/genomes/all/GCF/019/633/745/GCF_019633745.1_ASM1963374v1
GCA_002498315.1	d__Archaea;p__Halobacteriota;c__Methanomicrobia;o__Methanomicrobiales;f__Methanofollaceae;g__Methanofollis;s__Methanofollis sp002498315	Methanofollis sp. UBA420	Archaea;Euryarchaeota;Stenosarchaea group	UBA420	SAMN06027382	PRJNA348753	Scaffold	2.3423	60.8		DAGX01	7	0	2017-10-10T00:00:00Z	ftp://ftp.ncbi.nlm.nih.gov/genomes/all/GCA/002/498/315/GCA_002498315.1_ASM249831v1
GCA_016841665.1	d__Archaea;p__Halobacteriota;c__Methanomicrobia;o__Methanomicrobiales;f__Methanomicrobiaceae;g__DSDF01;s__DSDF01 sp016841665	Euryarchaeota archaeon	Archaea;Euryarchaeota;unclassified Euryarchaeota	BL5_bin.5	SAMN14918436	PRJNA630030	Scaffold	2.22165	56.9		JAENYT01	68	0	2021-02-09T00:00:00Z	ftp://ftp.ncbi.nlm.nih.gov/genomes/all/GCA/016/841/665/GCA_016841665.1_ASM1684166v1
GCA_016841485.1	d__Archaea;p__Halobacteriota;c__Methanomicrobia;o__Methanomicrobiales;f__Methanomicrobiaceae;g__Methanogenium;s__Methanogenium sp016841485	Euryarchaeota archaeon	Archaea;Euryarchaeota;unclassified Euryarchaeota	BL5_bin.12	SAMN14918443	PRJNA630030	Scaffold	2.36746	55.3		JAENZA01	288	0	2021-02-09T00:00:00Z	ftp://ftp.ncbi.nlm.nih.gov/genomes/all/GCA/016/841/485/GCA_016841485.1_ASM1684148v1
GCA_000784355.1	d__Archaea;p__Halobacteriota;c__Methanomicrobia;o__Methanomicrobiales;f__Methanomicrobiaceae;g__Methanolacinia;s__Methanolacinia paynteri	Methanolacinia paynteri	Archaea;Euryarchaeota;Stenosarchaea group	DSM 2545	SAMN03196739	PRJNA222641	Scaffold	2.7917	47.5		AXDV01	46	2721	2014-11-17T00:00:00Z	ftp://ftp.ncbi.nlm.nih.gov/genomes/all/GCA/000/784/355/GCA_000784355.1_Metpay	ftp://ftp.ncbi.nlm.nih.gov/genomes/all/GCF/000/784/355/GCF_000784355.1_Metpay
GCA_000147875.1	d__Archaea;p__Halobacteriota;c__Methanomicrobia;o__Methanomicrobiales;f__Methanomicrobiaceae;g__Methanolacinia;s__Methanolacinia petrolearia	Methanolacinia petrolearia DSM 11571	Archaea;Euryarchaeota;Stenosarchaea group	DSM 11571	SAMN00017400	PRJNA40773	Complete	2.84329	47.4	chromosome:NC_014507.1/CP002117.1		1	2781	2010-09-17T00:00:00Z	ftp://ftp.ncbi.nlm.nih.gov/genomes/all/GCA/000/147/875/GCA_000147875.1_ASM14787v1	ftp://ftp.ncbi.nlm.nih.gov/genomes/all/GCF/000/147/875/GCF_000147875.1_ASM14787v1
GCA_000243255.1	d__Archaea;p__Halobacteriota;c__Methanomicrobia;o__Methanomicrobiales;f__Methanomicrobiaceae;g__Methanoplanus;s__Methanoplanus limicola	Methanoplanus limicola DSM 2279	Archaea;Euryarchaeota;Stenosarchaea group	DSM 2279	SAMN02261391	PRJNA61291	Chromosome	3.20095	42.2	chromosome:NZ_CM001436.1/CM001436.1	AHKP01	1	2995	2012-01-19T00:00:00Z	ftp://ftp.ncbi.nlm.nih.gov/genomes/all/GCA/000/243/255/GCA_000243255.1_ASM24325v1	ftp://ftp.ncbi.nlm.nih.gov/genomes/all/GCF/000/243/255/GCF_000243255.1_ASM24325v1
GCA_002501965.1	d__Archaea;p__Halobacteriota;c__Methanomicrobia;o__Methanomicrobiales;f__Methanoregulaceae;g__Methanolinea_A;s__	Methanolinea sp. UBA286	Archaea;Euryarchaeota;Stenosarchaea group	UBA286	SAMN06027063	PRJNA348753	Scaffold	1.42991	58		DAOT01	186	0	2017-10-10T00:00:00Z	ftp://ftp.ncbi.nlm.nih.gov/genomes/all/GCA/002/501/965/GCA_002501965.1_ASM250196v1
GCA_018263335.1	d__Archaea;p__Halobacteriota;c__Methanomicrobia;o__Methanomicrobiales;f__Methanoregulaceae;g__Methanolinea_A;s__Methanolinea_A sp002067155	Methanolinea sp.	Archaea;Euryarchaeota;Stenosarchaea group	QR_Bin.1	SAMN16122904	PRJNA663217	Scaffold	2.02917	58		JADFCY01	47	0	2021-05-04T00:00:00Z	ftp://ftp.ncbi.nlm.nih.gov/genomes/all/GCA/018/263/335/GCA_018263335.1_ASM1826333v1
GCA_002506105.1	d__Archaea;p__Halobacteriota;c__Methanomicrobia;o__Methanomicrobiales;f__Methanoregulaceae;g__Methanolinea_A;s__Methanolinea_A sp002506105	Methanolinea sp. UBA275	Archaea;Euryarchaeota;Stenosarchaea group	UBA275	SAMN06027537	PRJNA348753	Scaffold	2.2347	53.3		DAWU01	67	0	2017-10-10T00:00:00Z	ftp://ftp.ncbi.nlm.nih.gov/genomes/all/GCA/002/506/105/GCA_002506105.1_ASM250610v1
GCA_002496855.1	d__Archaea;p__Halobacteriota;c__Methanomicrobia;o__Methanomicrobiales;f__Methanoregulaceae;g__Methanolinea_A;s__Methanolinea_A sp002506105	Methanolinea sp. UBA145	Archaea;Euryarchaeota;Stenosarchaea group	UBA145	SAMN06027034	PRJNA348753	Scaffold	2.2856	53.4		DALR01	89	0	2017-10-10T00:00:00Z	ftp://ftp.ncbi.nlm.nih.gov/genomes/all/GCA/002/496/855/GCA_002496855.1_ASM249685v1
GCA_002502975.1	d__Archaea;p__Halobacteriota;c__Methanomicrobia;o__Methanomicrobiales;f__Methanoregulaceae;g__Methanolinea_A;s__Methanolinea_A sp002506105	Methanolinea sp. UBA451	Archaea;Euryarchaeota;Stenosarchaea group	UBA451	SAMN06027327	PRJNA348753	Scaffold	2.43108	52.9		DAQT01	94	0	2017-10-10T00:00:00Z	ftp://ftp.ncbi.nlm.nih.gov/genomes/all/GCA/002/502/975/GCA_002502975.1_ASM250297v1
GCA_002499825.1	d__Archaea;p__Halobacteriota;c__Methanomicrobia;o__Methanomicrobiales;f__Methanoregulaceae;g__Methanolinea_A;s__Methanolinea_A sp002506105	Methanolinea sp. UBA245	Archaea;Euryarchaeota;Stenosarchaea group	UBA245	SAMN06027640	PRJNA348753	Scaffold	2.66686	52.9		DANI01	127	0	2017-10-10T00:00:00Z	ftp://ftp.ncbi.nlm.nih.gov/genomes/all/GCA/002/499/825/GCA_002499825.1_ASM249982v1
GCA_002509505.1	d__Archaea;p__Halobacteriota;c__Methanomicrobia;o__Methanomicrobiales;f__Methanoregulaceae;g__Methanolinea_A;s__Methanolinea_A sp002506105	Methanolinea sp. UBA155	Archaea;Euryarchaeota;Stenosarchaea group	UBA155	SAMN06027507	PRJNA348753	Scaffold	2.44878	53.4		DAPL01	170	0	2017-10-11T00:00:00Z	ftp://ftp.ncbi.nlm.nih.gov/genomes/all/GCA/002/509/505/GCA_002509505.1_ASM250950v1
GCA_002498825.1	d__Archaea;p__Halobacteriota;c__Methanomicrobia;o__Methanomicrobiales;f__Methanoregulaceae;g__Methanolinea_A;s__Methanolinea_A sp002506105	Methanolinea sp. UBA437	Archaea;Euryarchaeota;Stenosarchaea group	UBA437	SAMN06027559	PRJNA348753	Scaffold	2.50729	53.1		DAJA01	129	0	2017-10-10T00:00:00Z	ftp://ftp.ncbi.nlm.nih.gov/genomes/all/GCA/002/498/825/GCA_002498825.1_ASM249882v1
GCA_017994735.1	d__Archaea;p__Halobacteriota;c__Methanomicrobia;o__Methanomicrobiales;f__Methanoregulaceae;g__Methanolinea_A;s__Methanolinea_A sp002506105	Methanolinea sp.	Archaea;Euryarchaeota;Stenosarchaea group	Go_SlDig_bin_456	SAMN18120055	PRJNA524094	Scaffold	1.73397	53.9		JAGOKG01	157	1864	2021-04-15T00:00:00Z	ftp://ftp.ncbi.nlm.nih.gov/genomes/all/GCA/017/994/735/GCA_017994735.1_ASM1799473v1
GCA_022710875.1	d__Archaea;p__Halobacteriota;c__Methanomicrobia;o__Methanomicrobiales;f__Methanoregulaceae;g__Methanolinea_A;s__Methanolinea_A sp002506105	Methanolinea sp.	Archaea;Euryarchaeota;Stenosarchaea group	RA.bin30	SAMN25008219	PRJNA797519	Scaffold	1.61867	53.5		JAKLGC01	675	0	2022-03-28T00:00:00Z	ftp://ftp.ncbi.nlm.nih.gov/genomes/all/GCA/022/710/875/GCA_022710875.1_ASM2271087v1
GCA_002509495.1	d__Archaea;p__Halobacteriota;c__Methanomicrobia;o__Methanomicrobiales;f__Methanoregulaceae;g__Methanolinea_A;s__Methanolinea_A sp002509495	Methanolinea sp. UBA473	Archaea;Euryarchaeota;Stenosarchaea group	UBA473	SAMN06027619	PRJNA348753	Scaffold	2.19777	56.3		DAEV01	131	0	2017-10-11T00:00:00Z	ftp://ftp.ncbi.nlm.nih.gov/genomes/all/GCA/002/509/495/GCA_002509495.1_ASM250949v1
GCA_013331225.1	d__Archaea;p__Halobacteriota;c__Methanomicrobia;o__Methanomicrobiales;f__Methanoregulaceae;g__Methanolinea_A;s__Methanolinea_A sp11423u	Methanolinea sp.	Archaea;Euryarchaeota;Stenosarchaea group	UBA11423	SAMN13192971	PRJNA593905	Scaffold	1.75961	57.2		DUGV01	304	1942	2020-06-11T00:00:00Z	ftp://ftp.ncbi.nlm.nih.gov/genomes/all/GCA/013/331/225/GCA_013331225.1_ASM1333122v1
GCA_002839585.1	d__Archaea;p__Halobacteriota;c__Methanomicrobia;o__Methanomicrobiales;f__Methanoregulaceae;g__Methanoregula;s__	Methanomicrobiales archaeon HGW-Methanomicrobiales-5	Archaea;Euryarchaeota;Stenosarchaea group	HGW-Methanomicrobiales-5	SAMN06767739	PRJNA321556	Scaffold	1.16636	48.9		PGYI01	693	1547	2017-12-13T00:00:00Z	ftp://ftp.ncbi.nlm.nih.gov/genomes/all/GCA/002/839/585/GCA_002839585.1_ASM283958v1
GCA_023228255.1	d__Archaea;p__Halobacteriota;c__Methanomicrobia;o__Methanomicrobiales;f__Methanoregulaceae;g__Methanoregula;s__	Methanoregula sp.	Archaea;Euryarchaeota;Stenosarchaea group	SO_2017_LW3 bin 146	SAMN27301910	PRJNA823399	Scaffold	3.31669	47.6		JALOBL01	207	3674	2022-05-03T00:00:00Z	ftp://ftp.ncbi.nlm.nih.gov/genomes/all/GCA/023/228/255/GCA_023228255.1_ASM2322825v1
GCA_023249515.1	d__Archaea;p__Halobacteriota;c__Methanomicrobia;o__Methanomicrobiales;f__Methanoregulaceae;g__Methanoregula;s__	Methanomicrobiales archaeon	Archaea;Euryarchaeota;Stenosarchaea group	nzgw22	SAMN19017176	PRJNA699054	Scaffold	1.15562	57.4		JAHFCK01	240	0	2022-05-06T00:00:00Z	ftp://ftp.ncbi.nlm.nih.gov/genomes/all/GCA/023/249/515/GCA_023249515.1_ASM2324951v1
GCA_002497485.1	d__Archaea;p__Halobacteriota;c__Methanomicrobia;o__Methanomicrobiales;f__Methanoregulaceae;g__Methanoregula;s__	Methanoregula sp. UBA278	Archaea;Euryarchaeota;Stenosarchaea group	UBA278	SAMN06027018	PRJNA348753	Scaffold	1.7516	53.4		DADH01	197	0	2017-10-10T00:00:00Z	ftp://ftp.ncbi.nlm.nih.gov/genomes/all/GCA/002/497/485/GCA_002497485.1_ASM249748v1
GCA_000017625.1	d__Archaea;p__Halobacteriota;c__Methanomicrobia;o__Methanomicrobiales;f__Methanoregulaceae;g__Methanoregula;s__Methanoregula boonei	Methanoregula boonei 6A8	Archaea;Euryarchaeota;Stenosarchaea group	6A8	SAMN02598409	PRJNA18505	Complete	2.54294	54.5	chromosome:NC_009712.1/CP000780.1		1	2482	2007-07-26T00:00:00Z	ftp://ftp.ncbi.nlm.nih.gov/genomes/all/GCA/000/017/625/GCA_000017625.1_ASM1762v1	ftp://ftp.ncbi.nlm.nih.gov/genomes/all/GCF/000/017/625/GCF_000017625.1_ASM1762v1
GCA_000327485.1	d__Archaea;p__Halobacteriota;c__Methanomicrobia;o__Methanomicrobiales;f__Methanoregulaceae;g__Methanoregula;s__Methanoregula formicica	Methanoregula formicica SMSP	Archaea;Euryarchaeota;Stenosarchaea group	SMSP	SAMN02232038	PRJNA63567	Complete	2.82086	55.2	chromosome:NC_019943.1/CP003167.1		1	2828	2012-12-21T00:00:00Z	ftp://ftp.ncbi.nlm.nih.gov/genomes/all/GCA/000/327/485/GCA_000327485.1_ASM32748v1	ftp://ftp.ncbi.nlm.nih.gov/genomes/all/GCF/000/327/485/GCF_000327485.1_ASM32748v1
GCA_002509345.1	d__Archaea;p__Halobacteriota;c__Methanomicrobia;o__Methanomicrobiales;f__Methanoregulaceae;g__Methanoregula;s__Methanoregula sp002495055	Methanoregula sp. UBA469	Archaea;Euryarchaeota;Stenosarchaea group	UBA469	SAMN06027136	PRJNA348753	Scaffold	2.25355	47.3		DACM01	57	0	2017-10-11T00:00:00Z	ftp://ftp.ncbi.nlm.nih.gov/genomes/all/GCA/002/509/345/GCA_002509345.1_ASM250934v1
GCA_002495055.1	d__Archaea;p__Halobacteriota;c__Methanomicrobia;o__Methanomicrobiales;f__Methanoregulaceae;g__Methanoregula;s__Methanoregula sp002495055	Methanoregula sp. UBA247	Archaea;Euryarchaeota;Stenosarchaea group	UBA247	SAMN06027050	PRJNA348753	Scaffold	2.74833	48		DADR01	74	0	2017-10-10T00:00:00Z	ftp://ftp.ncbi.nlm.nih.gov/genomes/all/GCA/002/495/055/GCA_002495055.1_ASM249505v1
GCA_002497445.1	d__Archaea;p__Halobacteriota;c__Methanomicrobia;o__Methanomicrobiales;f__Methanoregulaceae;g__Methanoregula;s__Methanoregula sp002495055	Methanoregula sp. UBA450	Archaea;Euryarchaeota;Stenosarchaea group	UBA450	SAMN06027137	PRJNA348753	Scaffold	1.97514	48.3		DADD01	220	0	2017-10-10T00:00:00Z	ftp://ftp.ncbi.nlm.nih.gov/genomes/all/GCA/002/497/445/GCA_002497445.1_ASM249744v1
GCA_002495065.1	d__Archaea;p__Halobacteriota;c__Methanomicrobia;o__Methanomicrobiales;f__Methanoregulaceae;g__Methanoregula;s__Methanoregula sp002495065	Methanoregula sp. UBA471	Archaea;Euryarchaeota;Stenosarchaea group	UBA471	SAMN06027617	PRJNA348753	Scaffold	2.42422	50.1		DADT01	78	0	2017-10-10T00:00:00Z	ftp://ftp.ncbi.nlm.nih.gov/genomes/all/GCA/002/495/065/GCA_002495065.1_ASM249506v1
GCA_002502245.1	d__Archaea;p__Halobacteriota;c__Methanomicrobia;o__Methanomicrobiales;f__Methanoregulaceae;g__Methanoregula;s__Methanoregula sp002502245	Methanoregula sp. UBA154	Archaea;Euryarchaeota;Stenosarchaea group	UBA154	SAMN06027506	PRJNA348753	Scaffold	2.24744	55.8		DAPW01	33	0	2017-10-10T00:00:00Z	ftp://ftp.ncbi.nlm.nih.gov/genomes/all/GCA/002/502/245/GCA_002502245.1_ASM250224v1
GCA_002498295.1	d__Archaea;p__Halobacteriota;c__Methanomicrobia;o__Methanomicrobiales;f__Methanoregulaceae;g__Methanoregula;s__Methanoregula sp002502245	Methanoregula sp. UBA434	Archaea;Euryarchaeota;Stenosarchaea group	UBA434	SAMN06027558	PRJNA348753	Scaffold	2.29083	55.9		DAGW01	66	0	2017-10-10T00:00:00Z	ftp://ftp.ncbi.nlm.nih.gov/genomes/all/GCA/002/498/295/GCA_002498295.1_ASM249829v1
GCA_002506785.1	d__Archaea;p__Halobacteriota;c__Methanomicrobia;o__Methanomicrobiales;f__Methanoregulaceae;g__Methanoregula;s__Methanoregula sp002502245	Methanoregula sp. UBA452	Archaea;Euryarchaeota;Stenosarchaea group	UBA452	SAMN06027326	PRJNA348753	Scaffold	2.47933	55.7		DAYG01	85	0	2017-10-10T00:00:00Z	ftp://ftp.ncbi.nlm.nih.gov/genomes/all/GCA/002/506/785/GCA_002506785.1_ASM250678v1
GCA_002499025.1	d__Archaea;p__Halobacteriota;c__Methanomicrobia;o__Methanomicrobiales;f__Methanoregulaceae;g__Methanoregula;s__Methanoregula sp002502245	Methanoregula sp. UBA143	Archaea;Euryarchaeota;Stenosarchaea group	UBA143	SAMN06027032	PRJNA348753	Scaffold	2.15696	56		DAJZ01	78	0	2017-10-10T00:00:00Z	ftp://ftp.ncbi.nlm.nih.gov/genomes/all/GCA/002/499/025/GCA_002499025.1_ASM249902v1
GCA_002506145.1	d__Archaea;p__Halobacteriota;c__Methanomicrobia;o__Methanomicrobiales;f__Methanoregulaceae;g__Methanoregula;s__Methanoregula sp002502245	Methanoregula sp. UBA274	Archaea;Euryarchaeota;Stenosarchaea group	UBA274	SAMN06027538	PRJNA348753	Scaffold	2.16783	56		DAWY01	91	0	2017-10-10T00:00:00Z	ftp://ftp.ncbi.nlm.nih.gov/genomes/all/GCA/002/506/145/GCA_002506145.1_ASM250614v1
GCA_002495775.1	d__Archaea;p__Halobacteriota;c__Methanomicrobia;o__Methanomicrobiales;f__Methanoregulaceae;g__Methanoregula;s__Methanoregula sp002502245	Methanoregula sp. UBA244	Archaea;Euryarchaeota;Stenosarchaea group	UBA244	SAMN06027639	PRJNA348753	Scaffold	2.01258	55.3		DAGR01	104	0	2017-10-10T00:00:00Z	ftp://ftp.ncbi.nlm.nih.gov/genomes/all/GCA/002/495/775/GCA_002495775.1_ASM249577v1
GCA_002502735.1	d__Archaea;p__Halobacteriota;c__Methanomicrobia;o__Methanomicrobiales;f__Methanoregulaceae;g__Methanoregula;s__Methanoregula sp002502735	Methanoregula sp. UBA64	Archaea;Euryarchaeota;Stenosarchaea group	UBA64	SAMN06027271	PRJNA348753	Scaffold	2.38397	56.4		DAQC01	12	0	2017-10-10T00:00:00Z	ftp://ftp.ncbi.nlm.nih.gov/genomes/all/GCA/002/502/735/GCA_002502735.1_ASM250273v1
GCA_002508495.1	d__Archaea;p__Halobacteriota;c__Methanomicrobia;o__Methanomicrobiales;f__Methanoregulaceae;g__Methanoregula;s__Methanoregula sp002508495	Methanoregula sp. UBA276	Archaea;Euryarchaeota;Stenosarchaea group	UBA276	SAMN06027536	PRJNA348753	Scaffold	1.93465	55.7		DANA01	135	0	2017-10-11T00:00:00Z	ftp://ftp.ncbi.nlm.nih.gov/genomes/all/GCA/002/508/495/GCA_002508495.1_ASM250849v1
GCA_002839605.1	d__Archaea;p__Halobacteriota;c__Methanomicrobia;o__Methanomicrobiales;f__Methanoregulaceae;g__Methanoregula;s__Methanoregula sp002839605	Methanomicrobiales archaeon HGW-Methanomicrobiales-3	Archaea;Euryarchaeota;Stenosarchaea group	HGW-Methanomicrobiales-3	SAMN06767737	PRJNA321556	Scaffold	2.59135	55.3		PGYK01	18	2538	2017-12-13T00:00:00Z	ftp://ftp.ncbi.nlm.nih.gov/genomes/all/GCA/002/839/605/GCA_002839605.1_ASM283960v1
GCA_002839675.1	d__Archaea;p__Halobacteriota;c__Methanomicrobia;o__Methanomicrobiales;f__Methanoregulaceae;g__Methanoregula;s__Methanoregula sp002839675	Methanomicrobiales archaeon HGW-Methanomicrobiales-1	Archaea;Euryarchaeota;Stenosarchaea group	HGW-Methanomicrobiales-1	SAMN06767735	PRJNA321556	Scaffold	2.47008	51.4		PGYM01	5	2456	2017-12-13T00:00:00Z	ftp://ftp.ncbi.nlm.nih.gov/genomes/all/GCA/002/839/675/GCA_002839675.1_ASM283967v1
GCA_003136075.1	d__Archaea;p__Halobacteriota;c__Methanomicrobia;o__Methanomicrobiales;f__Methanoregulaceae;g__Methanoregula;s__Methanoregula sp003136075	Methanoregula sp.	Archaea;Euryarchaeota;Stenosarchaea group	fen_60	SAMN08179713	PRJNA386568	Scaffold	2.15746	50.5		PNBP01	197	0	2018-05-18T00:00:00Z	ftp://ftp.ncbi.nlm.nih.gov/genomes/all/GCA/003/136/075/GCA_003136075.1_20120700_E1X
GCA_003141335.1	d__Archaea;p__Halobacteriota;c__Methanomicrobia;o__Methanomicrobiales;f__Methanoregulaceae;g__Methanoregula;s__Methanoregula sp003141335	Methanoregula sp.	Archaea;Euryarchaeota;Stenosarchaea group	fen_80	SAMN08180150	PRJNA386568	Scaffold	2.01726	49.8		PLLR01	125	0	2018-05-18T00:00:00Z	ftp://ftp.ncbi.nlm.nih.gov/genomes/all/GCA/003/141/335/GCA_003141335.1_20120800_E3X
GCA_003154335.1	d__Archaea;p__Halobacteriota;c__Methanomicrobia;o__Methanomicrobiales;f__Methanoregulaceae;g__Methanoregula;s__Methanoregula sp003154335	Methanoregula sp.	Archaea;Euryarchaeota;Stenosarchaea group	fen_63	SAMN08179748	PRJNA386568	Scaffold	2.14458	47.9		PMDE01	156	0	2018-05-24T00:00:00Z	ftp://ftp.ncbi.nlm.nih.gov/genomes/all/GCA/003/154/335/GCA_003154335.1_20120700_E2X
GCA_003153835.1	d__Archaea;p__Halobacteriota;c__Methanomicrobia;o__Methanomicrobiales;f__Methanoregulaceae;g__Methanoregula;s__Methanoregula sp003154335	Methanoregula sp.	Archaea;Euryarchaeota;Stenosarchaea group	fen_66	SAMN08179794	PRJNA386568	Scaffold	1.91964	47.5		PMBL01	259	0	2018-05-24T00:00:00Z	ftp://ftp.ncbi.nlm.nih.gov/genomes/all/GCA/003/153/835/GCA_003153835.1_20120700_E3M
GCA_003135915.1	d__Archaea;p__Halobacteriota;c__Methanomicrobia;o__Methanomicrobiales;f__Methanoregulaceae;g__Methanoregula;s__Methanoregula sp003154335	Methanoregula sp.	Archaea;Euryarchaeota;Stenosarchaea group	fen_27	SAMN08179037	PRJNA386568	Scaffold	1.66494	48.6		PNBJ01	299	0	2018-05-18T00:00:00Z	ftp://ftp.ncbi.nlm.nih.gov/genomes/all/GCA/003/135/915/GCA_003135915.1_20110800_E1S
GCA_003170975.1	d__Archaea;p__Halobacteriota;c__Methanomicrobia;o__Methanomicrobiales;f__Methanoregulaceae;g__Methanoregula;s__Methanoregula sp003157895	Methanoregula sp.	Archaea;Euryarchaeota;Stenosarchaea group	fen_24	SAMN08179035	PRJNA386568	Scaffold	2.04585	53.5		PMXW01	182	0	2018-05-25T00:00:00Z	ftp://ftp.ncbi.nlm.nih.gov/genomes/all/GCA/003/170/975/GCA_003170975.1_20110800_E1M
GCA_003157895.1	d__Archaea;p__Halobacteriota;c__Methanomicrobia;o__Methanomicrobiales;f__Methanoregulaceae;g__Methanoregula;s__Methanoregula sp003157895	Methanoregula sp.	Archaea;Euryarchaeota;Stenosarchaea group	fen_47	SAMN08179543	PRJNA386568	Scaffold	2.03384	53.6		PMKW01	205	0	2018-05-24T00:00:00Z	ftp://ftp.ncbi.nlm.nih.gov/genomes/all/GCA/003/157/895/GCA_003157895.1_20120600_E1D
GCA_003170955.1	d__Archaea;p__Halobacteriota;c__Methanomicrobia;o__Methanomicrobiales;f__Methanoregulaceae;g__Methanoregula;s__Methanoregula sp003157895	Methanoregula sp.	Archaea;Euryarchaeota;Stenosarchaea group	fen_28	SAMN08179038	PRJNA386568	Scaffold	1.57822	54.4		PMXY01	228	0	2018-05-25T00:00:00Z	ftp://ftp.ncbi.nlm.nih.gov/genomes/all/GCA/003/170/955/GCA_003170955.1_20110800_E1S
GCA_003170075.1	d__Archaea;p__Halobacteriota;c__Methanomicrobia;o__Methanomicrobiales;f__Methanoregulaceae;g__Methanoregula;s__Methanoregula sp003170075	Methanoregula sp.	Archaea;Euryarchaeota;Stenosarchaea group	fen_34	SAMN08179087	PRJNA386568	Scaffold	1.92143	55		PMZU01	77	0	2018-05-25T00:00:00Z	ftp://ftp.ncbi.nlm.nih.gov/genomes/all/GCA/003/170/075/GCA_003170075.1_20110800_E3D
GCA_022710665.1	d__Archaea;p__Halobacteriota;c__Methanomicrobia;o__Methanomicrobiales;f__Methanoregulaceae;g__Methanoregula;s__Methanoregula sp022710665	Methanoregula sp.	Archaea;Euryarchaeota;Stenosarchaea group	RA.bin40	SAMN25008230	PRJNA797519	Scaffold	1.3871	54.7		JAKLGN01	242	0	2022-03-28T00:00:00Z	ftp://ftp.ncbi.nlm.nih.gov/genomes/all/GCA/022/710/665/GCA_022710665.1_ASM2271066v1
GCA_023228295.1	d__Archaea;p__Halobacteriota;c__Methanomicrobia;o__Methanomicrobiales;f__Methanoregulaceae;g__Methanoregula;s__Methanoregula sp023228295	Methanoregula sp.	Archaea;Euryarchaeota;Stenosarchaea group	SO_2017_LW3 bin 26	SAMN27301914	PRJNA823399	Scaffold	3.0955	52.8		JALOBP01	173	3186	2022-05-03T00:00:00Z	ftp://ftp.ncbi.nlm.nih.gov/genomes/all/GCA/023/228/295/GCA_023228295.1_ASM2322829v1
GCA_013331015.1	d__Archaea;p__Halobacteriota;c__Methanomicrobia;o__Methanomicrobiales;f__Methanoregulaceae;g__Methanoregula;s__Methanoregula sp11803u	Methanoregula sp.	Archaea;Euryarchaeota;Stenosarchaea group	UBA11803	SAMN13192981	PRJNA593905	Scaffold	2.18175	55.9		DUHF01	327	2238	2020-06-11T00:00:00Z	ftp://ftp.ncbi.nlm.nih.gov/genomes/all/GCA/013/331/015/GCA_013331015.1_ASM1333101v1
GCA_022711635.1	d__Archaea;p__Halobacteriota;c__Methanomicrobia;o__Methanomicrobiales;f__Methanoregulaceae;g__MVRE01;s__MVRE01 sp022711635	Methanoregula sp.	Archaea;Euryarchaeota;Stenosarchaea group	RA.bin137	SAMN25008181	PRJNA797519	Scaffold	1.8617	58.5		JAKLEQ01	189	0	2022-03-28T00:00:00Z	ftp://ftp.ncbi.nlm.nih.gov/genomes/all/GCA/022/711/635/GCA_022711635.1_ASM2271163v1
GCA_002509485.1	d__Archaea;p__Halobacteriota;c__Methanomicrobia;o__Methanomicrobiales;f__Methanoregulaceae;g__SD8;s__SD8 sp002509485	Methanolinea sp. UBA477	Archaea;Euryarchaeota;Stenosarchaea group	UBA477	SAMN06027623	PRJNA348753	Scaffold	1.66054	54.1		DAWO01	152	0	2017-10-11T00:00:00Z	ftp://ftp.ncbi.nlm.nih.gov/genomes/all/GCA/002/509/485/GCA_002509485.1_ASM250948v1
GCA_020431445.1	d__Archaea;p__Halobacteriota;c__Methanomicrobia;o__Methanomicrobiales;f__Methanoregulaceae;g__SD8;s__SD8 sp018432765	Methanolinea sp.	Archaea;Euryarchaeota;Stenosarchaea group	HKST-UBA01	SAMN14563873	PRJNA432264	Scaffold	1.85305	55.2		JAGQIG01	286	1995	2021-10-12T00:00:00Z	ftp://ftp.ncbi.nlm.nih.gov/genomes/all/GCA/020/431/445/GCA_020431445.1_ASM2043144v1
GCA_002503825.1	d__Archaea;p__Halobacteriota;c__Methanomicrobia;o__Methanomicrobiales;f__Methanoregulaceae;g__UBA467;s__UBA467 sp002503825	Methanoregulaceae archaeon UBA467	Archaea;Euryarchaeota;Stenosarchaea group	UBA467	SAMN06027139	PRJNA348753	Scaffold	2.83869	50.9		DASP01	17	0	2017-10-10T00:00:00Z	ftp://ftp.ncbi.nlm.nih.gov/genomes/all/GCA/002/503/825/GCA_002503825.1_ASM250382v1
GCA_013336125.1	d__Archaea;p__Halobacteriota;c__Methanomicrobia;o__Methanomicrobiales;f__Methanoregulaceae;g__UBA9949;s__	Methanoregulaceae archaeon	Archaea;Euryarchaeota;Stenosarchaea group	W4_Combined_metabat2_017	SAMN14482912	PRJNA615962	Scaffold	0.969729	55.2		JAAXUG01	328	1233	2020-06-11T00:00:00Z	ftp://ftp.ncbi.nlm.nih.gov/genomes/all/GCA/013/336/125/GCA_013336125.1_ASM1333612v1
GCA_013335855.1	d__Archaea;p__Halobacteriota;c__Methanomicrobia;o__Methanomicrobiales;f__Methanoregulaceae;g__UBA9949;s__	Methanoregulaceae archaeon	Archaea;Euryarchaeota;Stenosarchaea group	W4_Combined_metabat2_094	SAMN14482927	PRJNA615962	Scaffold	1.33175	57		JAAXUV01	435	1656	2020-06-11T00:00:00Z	ftp://ftp.ncbi.nlm.nih.gov/genomes/all/GCA/013/335/855/GCA_013335855.1_ASM1333585v1
GCA_002499905.1	d__Archaea;p__Halobacteriota;c__Methanomicrobia;o__Methanomicrobiales;f__Methanoregulaceae;g__UBA9949;s__UBA9949 sp002499905	Methanolinea sp. UBA277	Archaea;Euryarchaeota;Stenosarchaea group	UBA277	SAMN06027535	PRJNA348753	Scaffold	1.95487	57.4		DANP01	28	0	2017-10-10T00:00:00Z	ftp://ftp.ncbi.nlm.nih.gov/genomes/all/GCA/002/499/905/GCA_002499905.1_ASM249990v1
GCA_002497785.1	d__Archaea;p__Halobacteriota;c__Methanomicrobia;o__Methanomicrobiales;f__Methanoregulaceae;g__UBA9949;s__UBA9949 sp002499905	Methanolinea sp. UBA144	Archaea;Euryarchaeota;Stenosarchaea group	UBA144	SAMN06027035	PRJNA348753	Scaffold	1.80823	57.7		DAEU01	38	0	2017-10-10T00:00:00Z	ftp://ftp.ncbi.nlm.nih.gov/genomes/all/GCA/002/497/785/GCA_002497785.1_ASM249778v1
GCA_017999755.1	d__Archaea;p__Halobacteriota;c__Methanomicrobia;o__Methanomicrobiales;f__Methanoregulaceae;g__UBA9949;s__UBA9949 sp012516785	Methanoregulaceae archaeon	Archaea;Euryarchaeota;Stenosarchaea group	Go_SlDig_bin_40	SAMN18119113	PRJNA524094	Scaffold	0.881932	54.2		JAGNLG01	26	898	2021-04-15T00:00:00Z	ftp://ftp.ncbi.nlm.nih.gov/genomes/all/GCA/017/999/755/GCA_017999755.1_ASM1799975v1
GCA_016699325.1	d__Archaea;p__Halobacteriota;c__Methanomicrobia;o__Methanomicrobiales;f__Methanoregulaceae;g__UBA9949;s__UBA9949 sp016699325	Methanolinea sp.	Archaea;Euryarchaeota;Stenosarchaea group	EsbE_18-Q3-R3-47_BAT3C.270	SAMN16425822	PRJNA629478	Chromosome	1.95113	55.6	chromosome:CP064971.1		1	1915	2021-01-19T00:00:00Z	ftp://ftp.ncbi.nlm.nih.gov/genomes/all/GCA/016/699/325/GCA_016699325.1_ASM1669932v1
GCA_022710385.1	d__Archaea;p__Halobacteriota;c__Methanomicrobia;o__Methanomicrobiales;f__Methanoregulaceae;g__UBA9949;s__UBA9949 sp022710385	Methanoregula sp.	Archaea;Euryarchaeota;Stenosarchaea group	RA.bin51	SAMN25008242	PRJNA797519	Scaffold	1.73525	53.7		JAKLGZ01	197	0	2022-03-28T00:00:00Z	ftp://ftp.ncbi.nlm.nih.gov/genomes/all/GCA/022/710/385/GCA_022710385.1_ASM2271038v1
GCA_022838145.1	d__Archaea;p__Halobacteriota;c__Methanomicrobia;o__Methanomicrobiales;f__Methanoregulaceae;g__UBA9949;s__UBA9949 sp022841205	Methanomicrobiales archaeon	Archaea;Euryarchaeota;Stenosarchaea group	4-aug_S1_003	SAMN26856753	PRJNA818325	Scaffold	2.18237	54.9		JALHGE01	82	0	2022-04-08T00:00:00Z	ftp://ftp.ncbi.nlm.nih.gov/genomes/all/GCA/022/838/145/GCA_022838145.1_ASM2283814v1
GCA_022841205.1	d__Archaea;p__Halobacteriota;c__Methanomicrobia;o__Methanomicrobiales;f__Methanoregulaceae;g__UBA9949;s__UBA9949 sp022841205	Methanomicrobiales archaeon	Archaea;Euryarchaeota;Stenosarchaea group	1-no_shock_S1_004	SAMN26856655	PRJNA818325	Scaffold	2.22712	54.8		JALHCK01	103	0	2022-04-08T00:00:00Z	ftp://ftp.ncbi.nlm.nih.gov/genomes/all/GCA/022/841/205/GCA_022841205.1_ASM2284120v1
GCA_022838945.1	d__Archaea;p__Halobacteriota;c__Methanomicrobia;o__Methanomicrobiales;f__Methanoregulaceae;g__UBA9949;s__UBA9949 sp022841205	Methanomicrobiales archaeon	Archaea;Euryarchaeota;Stenosarchaea group	2-no_aug_S1_004	SAMN26856686	PRJNA818325	Scaffold	2.30079	54.6		JALHDP01	131	0	2022-04-08T00:00:00Z	ftp://ftp.ncbi.nlm.nih.gov/genomes/all/GCA/022/838/945/GCA_022838945.1_ASM2283894v1
GCA_013331415.1	d__Archaea;p__Halobacteriota;c__Methanomicrobia;o__Methanomicrobiales;f__Methanoregulaceae;g__UBA9949;s__UBA9949 sp10516u	Methanoregulaceae archaeon	Archaea;Euryarchaeota;Stenosarchaea group	UBA10516	SAMN13192961	PRJNA593905	Scaffold	1.73292	58.5		DUGL01	224	1777	2020-06-11T00:00:00Z	ftp://ftp.ncbi.nlm.nih.gov/genomes/all/GCA/013/331/415/GCA_013331415.1_ASM1333141v1
GCA_000021965.1	d__Archaea;p__Halobacteriota;c__Methanomicrobia;o__Methanomicrobiales;f__Methanosphaerulaceae;g__Methanosphaerula;s__Methanosphaerula palustris	Methanosphaerula palustris E1-9c	Archaea;Euryarchaeota;Stenosarchaea group	E1-9c	SAMN00001866	PRJNA29381	Complete	2.92292	55.4	chromosome:NC_011832.1/CP001338.1		1	2735	2009-01-05T00:00:00Z	ftp://ftp.ncbi.nlm.nih.gov/genomes/all/GCA/000/021/965/GCA_000021965.1_ASM2196v1	ftp://ftp.ncbi.nlm.nih.gov/genomes/all/GCF/000/021/965/GCF_000021965.1_ASM2196v1
GCA_002495225.1	d__Archaea;p__Halobacteriota;c__Methanomicrobia;o__Methanomicrobiales;f__Methanosphaerulaceae;g__UBA288;s__UBA288 sp002495225	Methanoregulaceae archaeon UBA288	Archaea;Euryarchaeota;Stenosarchaea group	UBA288	SAMN06027061	PRJNA348753	Scaffold	1.93041	68.5		DAEF01	253	0	2017-10-10T00:00:00Z	ftp://ftp.ncbi.nlm.nih.gov/genomes/all/GCA/002/495/225/GCA_002495225.1_ASM249522v1
GCA_013331215.1	d__Archaea;p__Halobacteriota;c__Methanomicrobia;o__Methanomicrobiales;f__Methanosphaerulaceae;g__UBA288;s__UBA288 sp11384u	Methanoregulaceae archaeon	Archaea;Euryarchaeota;Stenosarchaea group	UBA11384	SAMN13192970	PRJNA593905	Scaffold	2.15467	66.6		DUGU01	348	2303	2020-06-11T00:00:00Z	ftp://ftp.ncbi.nlm.nih.gov/genomes/all/GCA/013/331/215/GCA_013331215.1_ASM1333121v1
GCA_002839625.1	d__Archaea;p__Halobacteriota;c__Methanomicrobia;o__Methanomicrobiales;f__Methanospirillaceae;g__Methanospirillum;s__	Methanomicrobiales archaeon HGW-Methanomicrobiales-4	Archaea;Euryarchaeota;Stenosarchaea group	HGW-Methanomicrobiales-4	SAMN06767738	PRJNA321556	Scaffold	1.84701	46.2		PGYJ01	683	2087	2017-12-13T00:00:00Z	ftp://ftp.ncbi.nlm.nih.gov/genomes/all/GCA/002/839/625/GCA_002839625.1_ASM283962v1
GCA_000013445.1	d__Archaea;p__Halobacteriota;c__Methanomicrobia;o__Methanomicrobiales;f__Methanospirillaceae;g__Methanospirillum;s__Methanospirillum hungatei	Methanospirillum hungatei JF-1	Archaea;Euryarchaeota;Stenosarchaea group	JF-1	SAMN02598287	PRJNA13015	Complete	3.54474	45.1	chromosome:NC_007796.1/CP000254.1		1	3287	2006-02-17T00:00:00Z	ftp://ftp.ncbi.nlm.nih.gov/genomes/all/GCA/000/013/445/GCA_000013445.1_ASM1344v1	ftp://ftp.ncbi.nlm.nih.gov/genomes/all/GCF/000/013/445/GCF_000013445.1_ASM1344v1
GCA_001602695.1	d__Archaea;p__Halobacteriota;c__Methanomicrobia;o__Methanomicrobiales;f__Methanospirillaceae;g__Methanospirillum;s__Methanospirillum hungatei	Methanomicrobiales archaeon Methan_06	Archaea;Euryarchaeota;Stenosarchaea group	Methan_06	SAMN03837488	PRJNA284316	Scaffold	1.61691	47.9		LUYJ01	427	0	2016-03-30T00:00:00Z	ftp://ftp.ncbi.nlm.nih.gov/genomes/all/GCA/001/602/695/GCA_001602695.1_ASM160269v1
GCA_002496135.1	d__Archaea;p__Halobacteriota;c__Methanomicrobia;o__Methanomicrobiales;f__Methanospirillaceae;g__Methanospirillum;s__Methanospirillum hungatei	Methanomicrobiales archaeon UBA81	Archaea;Euryarchaeota;Stenosarchaea group	UBA81	SAMN06027111	PRJNA348753	Scaffold	2.66775	45.8		DAIN01	243	0	2017-10-10T00:00:00Z	ftp://ftp.ncbi.nlm.nih.gov/genomes/all/GCA/002/496/135/GCA_002496135.1_ASM249613v1
GCA_019136755.1	d__Archaea;p__Halobacteriota;c__Methanomicrobia;o__Methanomicrobiales;f__Methanospirillaceae;g__Methanospirillum;s__Methanospirillum sp012520015	Methanomicrobiales archaeon	Archaea;Euryarchaeota;Stenosarchaea group	THP_Bin_5	SAMN18201439	PRJNA703818	Scaffold	2.06958	45.8		JAGVTP01	215	0	2021-07-06T00:00:00Z	ftp://ftp.ncbi.nlm.nih.gov/genomes/all/GCA/019/136/755/GCA_019136755.1_ASM1913675v1
GCA_019263745.1	d__Archaea;p__Halobacteriota;c__Methanomicrobia;o__Methanomicrobiales;f__Methanospirillaceae;g__Methanospirillum;s__Methanospirillum sp012729995	Methanospirillum hungatei	Archaea;Euryarchaeota;Stenosarchaea group	GP1	SAMN19775401	PRJNA739174	Complete	3.39314	42.2	chromosome:NZ_CP077107.1/CP077107.1		1	3139	2021-07-16T00:00:00Z	ftp://ftp.ncbi.nlm.nih.gov/genomes/all/GCA/019/263/745/GCA_019263745.1_ASM1926374v1	ftp://ftp.ncbi.nlm.nih.gov/genomes/all/GCF/019/263/745/GCF_019263745.1_ASM1926374v1
GCA_000711905.1	d__Archaea;p__Halobacteriota;c__Methanosarcinia_A;o__Methanosarcinales_A;f__Methermicoccaceae;g__Methermicoccus;s__Methermicoccus shengliensis	Methermicoccus shengliensis DSM 18856	Archaea;Euryarchaeota;Stenosarchaea group	DSM 18856	SAMN02746094	PRJNA235052	Scaffold	1.51358	54.7		JONQ01	15	1600	2014-06-24T00:00:00Z	ftp://ftp.ncbi.nlm.nih.gov/genomes/all/GCA/000/711/905/GCA_000711905.1_ASM71190v1	ftp://ftp.ncbi.nlm.nih.gov/genomes/all/GCF/000/711/905/GCF_000711905.1_ASM71190v1
GCA_002494745.1	d__Archaea;p__Halobacteriota;c__Methanosarcinia_A;o__Methanosarcinales_A;f__Methermicoccaceae;g__Methermicoccus;s__Methermicoccus shengliensis	Methanotrichaceae archaeon UBA116	Archaea;Euryarchaeota;Stenosarchaea group	UBA116	SAMN06027414	PRJNA348753	Scaffold	1.33465	55.2		DACQ01	14	0	2017-10-10T00:00:00Z	ftp://ftp.ncbi.nlm.nih.gov/genomes/all/GCA/002/494/745/GCA_002494745.1_ASM249474v1
GCA_013330515.1	d__Archaea;p__Halobacteriota;c__Methanosarcinia_A;o__Methanosarcinales_A;f__Methermicoccaceae;g__Methermicoccus;s__Methermicoccus shengliensis	Methermicoccus shengliensis	Archaea;Euryarchaeota;Stenosarchaea group	UBA12518	SAMN13193009	PRJNA593905	Scaffold	1.36884	55.2		DUIH01	24	1424	2020-06-11T00:00:00Z	ftp://ftp.ncbi.nlm.nih.gov/genomes/all/GCA/013/330/515/GCA_013330515.1_ASM1333051v1
GCA_012910725.1	d__Archaea;p__Halobacteriota;c__Methanosarcinia;o__Methanosarcinales;f__EX4572-44;g__Ethanoperedens;s__Ethanoperedens thermophilum	Candidatus Ethanoperedens thermophilum	Archaea;Euryarchaeota;Stenosarchaea group	GoM-Arc1-LC-WB58	SAMN13220465	PRJNA587885	Scaffold	1.24594	41.3		WNEG01	114	1274	2020-04-27T00:00:00Z	ftp://ftp.ncbi.nlm.nih.gov/genomes/all/GCA/012/910/725/GCA_012910725.1_ASM1291072v1
GCA_002254825.2	d__Archaea;p__Halobacteriota;c__Methanosarcinia;o__Methanosarcinales;f__EX4572-44;g__EX4572-44;s__EX4572-44 sp002254825	Methanosarcinales archaeon ex4572_44	Archaea;Euryarchaeota;Stenosarchaea group	ex4572_44	SAMN06647985	PRJNA362212	Scaffold	1.06978	46.3		NJEL02	76	1051	2017-08-16T00:00:00Z	ftp://ftp.ncbi.nlm.nih.gov/genomes/all/GCA/002/254/825/GCA_002254825.2_ASM225482v2
GCA_905171685.1	d__Archaea;p__Halobacteriota;c__Methanosarcinia;o__Methanosarcinales;f__EX4572-44;g__EX4572-44;s__EX4572-44 sp905171695	Candidatus Methanoperedenaceae archaeon GB50	Archaea;Euryarchaeota;Stenosarchaea group	gfbio:2ba61e4a-a911-483b-ba5e-e0ad8afd3b38:GoM-Arc1_E50	SAMEA7740439	PRJEB36446	Complete	1.92027	46.5	chromosome 1:LR991654.1		1	2078	2021-01-25T00:00:00Z	ftp://ftp.ncbi.nlm.nih.gov/genomes/all/GCA/905/171/685/GCA_905171685.1_GoM-Arc1_E50
GCA_013374455.1	d__Archaea;p__Halobacteriota;c__Methanosarcinia;o__Methanosarcinales;f__Methanocomedenaceae;g__Methanocomedens;s__Methanocomedens sp009649835	ANME-2 cluster archaeon	Archaea;Euryarchaeota;Stenosarchaea group	CONS7142G09b1	SAMN08574232	PRJNA431796	Scaffold	2.14113	44		QCYW01	193	2467	2020-06-26T00:00:00Z	ftp://ftp.ncbi.nlm.nih.gov/genomes/all/GCA/013/374/455/GCA_013374455.1_ASM1337445v1
GCA_013374465.1	d__Archaea;p__Halobacteriota;c__Methanosarcinia;o__Methanosarcinales;f__Methanocomedenaceae;g__Methanocomedens;s__Methanocomedens sp009649835	ANME-2 cluster archaeon	Archaea;Euryarchaeota;Stenosarchaea group	CONS7142H05b1	SAMN08574233	PRJNA431796	Scaffold	1.72694	43.6		QGHJ01	167	2008	2020-06-26T00:00:00Z	ftp://ftp.ncbi.nlm.nih.gov/genomes/all/GCA/013/374/465/GCA_013374465.1_ASM1337446v1
GCA_009649835.1	d__Archaea;p__Halobacteriota;c__Methanosarcinia;o__Methanosarcinales;f__Methanocomedenaceae;g__Methanocomedens;s__Methanocomedens sp009649835	ANME-2 cluster archaeon	Archaea;Euryarchaeota;Stenosarchaea group	S7142MS1	SAMN08574221	PRJNA431796	Scaffold	1.81303	46		PYCK01	247	1887	2019-11-11T00:00:00Z	ftp://ftp.ncbi.nlm.nih.gov/genomes/all/GCA/009/649/835/GCA_009649835.1_ASM964983v1
GCA_014237495.1	d__Archaea;p__Halobacteriota;c__Methanosarcinia;o__Methanosarcinales;f__Methanocomedenaceae;g__Methanocomedens;s__Methanocomedens sp014237145	ANME-2 cluster archaeon	Archaea;Euryarchaeota;Stenosarchaea group	8MPa	SAMN13483407	PRJNA593687	Scaffold	3.25932	42.9		JAAXOD01	124	3361	2020-08-18T00:00:00Z	ftp://ftp.ncbi.nlm.nih.gov/genomes/all/GCA/014/237/495/GCA_014237495.1_ASM1423749v1
GCA_014237115.1	d__Archaea;p__Halobacteriota;c__Methanosarcinia;o__Methanosarcinales;f__Methanocomedenaceae;g__Methanocomedens;s__Methanocomedens sp014237145	ANME-2 cluster archaeon	Archaea;Euryarchaeota;Stenosarchaea group	8MPaII	SAMN13483410	PRJNA593687	Scaffold	3.24867	42.9		JAAXOG01	133	3328	2020-08-18T00:00:00Z	ftp://ftp.ncbi.nlm.nih.gov/genomes/all/GCA/014/237/115/GCA_014237115.1_ASM1423711v1
GCA_013572335.1	d__Archaea;p__Halobacteriota;c__Methanosarcinia;o__Methanosarcinales;f__Methanocomedenaceae;g__Methanocomedens;s__Methanocomedens sp7939u	ANME-2 cluster archaeon	Archaea;Euryarchaeota;Stenosarchaea group	HMMV-459B4	SAMN08574228	PRJNA431796	Scaffold	1.45488	45.6		QBUQ01	260	1462	2020-07-23T00:00:00Z	ftp://ftp.ncbi.nlm.nih.gov/genomes/all/GCA/013/572/335/GCA_013572335.1_ASM1357233v1
GCA_013330355.1	d__Archaea;p__Halobacteriota;c__Methanosarcinia;o__Methanosarcinales;f__Methanocomedenaceae;g__Methanocomedens;s__Methanocomedens sp7939u	Methanosarcinales archaeon	Archaea;Euryarchaeota;Stenosarchaea group	UBA7939	SAMN13193014	PRJNA593905	Scaffold	1.19702	44.1		DUIM01	194	1301	2020-06-11T00:00:00Z	ftp://ftp.ncbi.nlm.nih.gov/genomes/all/GCA/013/330/355/GCA_013330355.1_ASM1333035v1
GCA_013374525.1	d__Archaea;p__Halobacteriota;c__Methanosarcinia;o__Methanosarcinales;f__Methanocomedenaceae;g__Methanomarinus;s__Methanomarinus sp002926195	ANME-2 cluster archaeon	Archaea;Euryarchaeota;Stenosarchaea group	CONS3730E01UFb2	SAMN08574230	PRJNA431796	Scaffold	2.37315	38.6		QENI01	292	2649	2020-06-26T00:00:00Z	ftp://ftp.ncbi.nlm.nih.gov/genomes/all/GCA/013/374/525/GCA_013374525.1_ASM1337452v1
GCA_013374495.1	d__Archaea;p__Halobacteriota;c__Methanosarcinia;o__Methanosarcinales;f__Methanocomedenaceae;g__Methanomarinus;s__Methanomarinus sp002926195	ANME-2 cluster archaeon	Archaea;Euryarchaeota;Stenosarchaea group	CONS3730F09p3b1	SAMN08574229	PRJNA431796	Scaffold	2.44769	38.8		QCYX01	316	2733	2020-06-26T00:00:00Z	ftp://ftp.ncbi.nlm.nih.gov/genomes/all/GCA/013/374/495/GCA_013374495.1_ASM1337449v1
GCA_005504395.1	d__Archaea;p__Halobacteriota;c__Methanosarcinia;o__Methanosarcinales;f__Methanocomedenaceae;g__Methanomarinus;s__Methanomarinus sp002926195	ANME-2 cluster archaeon	Archaea;Euryarchaeota;Stenosarchaea group	CONS3730D10UFb2	SAMN08574234	PRJNA431796	Scaffold	1.41728	38.9		QYBA01	266	1489	2019-05-17T00:00:00Z	ftp://ftp.ncbi.nlm.nih.gov/genomes/all/GCA/005/504/395/GCA_005504395.1_ASM550439v1
GCA_013374385.1	d__Archaea;p__Halobacteriota;c__Methanosarcinia;o__Methanosarcinales;f__Methanocomedenaceae;g__QBUR01;s__QBUR01 sp013374385	ANME-2 cluster archaeon	Archaea;Euryarchaeota;Stenosarchaea group	HMMV-459A3	SAMN08574231	PRJNA431796	Scaffold	1.17264	46.3		QBUR01	192	1237	2020-06-26T00:00:00Z	ftp://ftp.ncbi.nlm.nih.gov/genomes/all/GCA/013/374/385/GCA_013374385.1_ASM1337438v1
GCA_023544575.1	d__Archaea;p__Halobacteriota;c__Methanosarcinia;o__Methanosarcinales;f__Methanocomedenaceae;g__QBUR01;s__QBUR01 sp019429385	ANME-2 cluster archaeon	Archaea;Euryarchaeota;Stenosarchaea group	B4-04	SAMN28014431	PRJNA833668	Scaffold	1.97769	46.1		JAMJFR01	127	2121	2022-05-24T00:00:00Z	ftp://ftp.ncbi.nlm.nih.gov/genomes/all/GCA/023/544/575/GCA_023544575.1_ASM2354457v1
GCA_023544495.1	d__Archaea;p__Halobacteriota;c__Methanosarcinia;o__Methanosarcinales;f__Methanocomedenaceae;g__QBUR01;s__QBUR01 sp023544495	ANME-2 cluster archaeon	Archaea;Euryarchaeota;Stenosarchaea group	B4-08	SAMN28014435	PRJNA833668	Scaffold	2.34438	45.1		JAMJFV01	439	2448	2022-05-24T00:00:00Z	ftp://ftp.ncbi.nlm.nih.gov/genomes/all/GCA/023/544/495/GCA_023544495.1_ASM2354449v1
GCA_023544605.1	d__Archaea;p__Halobacteriota;c__Methanosarcinia;o__Methanosarcinales;f__Methanocomedenaceae;g__QBUR01;s__QBUR01 sp023544605	ANME-2 cluster archaeon	Archaea;Euryarchaeota;Stenosarchaea group	B4-03	SAMN28014430	PRJNA833668	Scaffold	1.62893	46.6		JAMJFQ01	129	1773	2022-05-24T00:00:00Z	ftp://ftp.ncbi.nlm.nih.gov/genomes/all/GCA/023/544/605/GCA_023544605.1_ASM2354460v1
GCA_013374405.1	d__Archaea;p__Halobacteriota;c__Methanosarcinia;o__Methanosarcinales;f__Methanogasteraceae;g__Methanogaster;s__	ANME-2 cluster archaeon	Archaea;Euryarchaeota;Stenosarchaea group	AMVER4-31	SAMN08574235	PRJNA431796	Scaffold	1.60134	50.6		QBUS01	109	1641	2020-06-26T00:00:00Z	ftp://ftp.ncbi.nlm.nih.gov/genomes/all/GCA/013/374/405/GCA_013374405.1_ASM1337440v1
GCA_013374365.1	d__Archaea;p__Halobacteriota;c__Methanosarcinia;o__Methanosarcinales;f__Methanogasteraceae;g__Methanogaster;s__	ANME-2 cluster archaeon	Archaea;Euryarchaeota;Stenosarchaea group	Agg-C10	SAMN08574237	PRJNA431796	Scaffold	1.52708	47.9		QBUU01	277	1713	2020-06-26T00:00:00Z	ftp://ftp.ncbi.nlm.nih.gov/genomes/all/GCA/013/374/365/GCA_013374365.1_ASM1337436v1
GCA_003336385.2	d__Archaea;p__Halobacteriota;c__Methanosarcinia;o__Methanosarcinales;f__Methanogasteraceae;g__Methanogaster;s__	ANME-2 cluster archaeon	Archaea;Euryarchaeota;Stenosarchaea group	S7142MS2	SAMN08606019	PRJNA431796	Scaffold	1.64775	52		PYCL02	387	1749	2018-07-24T00:00:00Z	ftp://ftp.ncbi.nlm.nih.gov/genomes/all/GCA/003/336/385/GCA_003336385.2_ASM333638v2
GCA_002503595.1	d__Archaea;p__Halobacteriota;c__Methanosarcinia;o__Methanosarcinales;f__Methanogasteraceae;g__Methanogaster;s__Methanogaster sp002503595	Methanosarcinales archaeon UBA203	Archaea;Euryarchaeota;Stenosarchaea group	UBA203	SAMN06027572	PRJNA348753	Scaffold	2.39047	50.1		DASC01	223	0	2017-10-10T00:00:00Z	ftp://ftp.ncbi.nlm.nih.gov/genomes/all/GCA/002/503/595/GCA_002503595.1_ASM250359v1
GCA_002506015.1	d__Archaea;p__Halobacteriota;c__Methanosarcinia;o__Methanosarcinales;f__Methanogasteraceae;g__Methanogaster;s__Methanogaster sp002506015	Methanosarcinales archaeon UBA261	Archaea;Euryarchaeota;Stenosarchaea group	UBA261	SAMN06027188	PRJNA348753	Scaffold	2.36835	50.1		DAWR01	224	0	2017-10-10T00:00:00Z	ftp://ftp.ncbi.nlm.nih.gov/genomes/all/GCA/002/506/015/GCA_002506015.1_ASM250601v1
GCA_004211975.1	d__Archaea;p__Halobacteriota;c__Methanosarcinia;o__Methanosarcinales;f__Methanogasteraceae;g__Methanogaster;s__Methanogaster sp004211975	Methanosarcinales archaeon	Archaea;Euryarchaeota;Stenosarchaea group	ANME-2c-GOS	SAMN10390739	PRJNA472146	Scaffold	2.6561	48.5		RXIK01	249	2479	2019-02-19T00:00:00Z	ftp://ftp.ncbi.nlm.nih.gov/genomes/all/GCA/004/211/975/GCA_004211975.1_ASM421197v1
GCA_013572355.1	d__Archaea;p__Halobacteriota;c__Methanosarcinia;o__Methanosarcinales;f__Methanogasteraceae;g__Methanogaster;s__Methanogaster sp013572355	ANME-2 cluster archaeon	Archaea;Euryarchaeota;Stenosarchaea group	HMMV-459B1	SAMN08574240	PRJNA431796	Scaffold	1.68864	52.6		QBUV01	226	1705	2020-07-23T00:00:00Z	ftp://ftp.ncbi.nlm.nih.gov/genomes/all/GCA/013/572/355/GCA_013572355.1_ASM1357235v1
GCA_002839545.1	d__Archaea;p__Halobacteriota;c__Methanosarcinia;o__Methanosarcinales;f__Methanoperedenaceae;g__Methanoperedens_A;s__Methanoperedens_A sp002839545	Candidatus Methanoperedenaceae archaeon HGW-Methanoperedenaceae-1	Archaea;Euryarchaeota;Stenosarchaea group	HGW-Methanoperedenaceae-1	SAMN06767741	PRJNA321556	Scaffold	1.99526	43.1		PGYG01	128	2122	2017-12-13T00:00:00Z	ftp://ftp.ncbi.nlm.nih.gov/genomes/all/GCA/002/839/545/GCA_002839545.1_ASM283954v1
GCA_017884895.1	d__Archaea;p__Halobacteriota;c__Methanosarcinia;o__Methanosarcinales;f__Methanoperedenaceae;g__Methanoperedens;s__	Candidatus Methanoperedenaceae archaeon	Archaea;Euryarchaeota;Stenosarchaea group	bin_62	SAMN17914739	PRJNA667178	Scaffold	1.10982	40.4		JAFNHC01	244	0	2021-04-08T00:00:00Z	ftp://ftp.ncbi.nlm.nih.gov/genomes/all/GCA/017/884/895/GCA_017884895.1_ASM1788489v1
GCA_000685155.1	d__Archaea;p__Halobacteriota;c__Methanosarcinia;o__Methanosarcinales;f__Methanoperedenaceae;g__Methanoperedens;s__Methanoperedens nitroreducens	Candidatus Methanoperedens nitroreducens	Archaea;Euryarchaeota;Stenosarchaea group	ANME-2d	SAMN02713514	PRJNA242803	Scaffold	3.20339	43.2		JMIY01	10	3342	2014-05-06T00:00:00Z	ftp://ftp.ncbi.nlm.nih.gov/genomes/all/GCA/000/685/155/GCA_000685155.1_ANME2D_V10	ftp://ftp.ncbi.nlm.nih.gov/genomes/all/GCF/000/685/155/GCF_000685155.1_ANME2D_V10
GCA_002496325.1	d__Archaea;p__Halobacteriota;c__Methanosarcinia;o__Methanosarcinales;f__Methanoperedenaceae;g__Methanoperedens;s__Methanoperedens nitroreducens	Candidatus Methanoperedens sp. UBA453	Archaea;Euryarchaeota;Stenosarchaea group	UBA453	SAMN06027325	PRJNA348753	Scaffold	3.08605	43.3		DAJM01	72	0	2017-10-10T00:00:00Z	ftp://ftp.ncbi.nlm.nih.gov/genomes/all/GCA/002/496/325/GCA_002496325.1_ASM249632v1
GCA_020724545.1	d__Archaea;p__Halobacteriota;c__Methanosarcinia;o__Methanosarcinales;f__Methanoperedenaceae;g__Methanoperedens;s__Methanoperedens nitroreducens_B	Candidatus Methanoperedens nitroreducens	Archaea;Euryarchaeota;Stenosarchaea group	BE2012_43_12	SAMN22209299	PRJNA767587	Scaffold	2.91697	43.2		DYGR01	88	0	2021-11-02T00:00:00Z	ftp://ftp.ncbi.nlm.nih.gov/genomes/all/GCA/020/724/545/GCA_020724545.1_ASM2072454v1
GCA_003104905.1	d__Archaea;p__Halobacteriota;c__Methanosarcinia;o__Methanosarcinales;f__Methanoperedenaceae;g__Methanoperedens;s__Methanoperedens sp003104905	Candidatus Methanoperedenaceae archaeon	Archaea;Euryarchaeota;Stenosarchaea group	FeB_1	SAMN08364719	PRJNA378332	Scaffold	2.91322	40.8		PQAS01	59	2911	2018-05-09T00:00:00Z	ftp://ftp.ncbi.nlm.nih.gov/genomes/all/GCA/003/104/905/GCA_003104905.1_ASM310490v1
GCA_012026795.1	d__Archaea;p__Halobacteriota;c__Methanosarcinia;o__Methanosarcinales;f__Methanoperedenaceae;g__Methanoperedens;s__Methanoperedens sp012026795	Candidatus Methanoperedens sp.	Archaea;Euryarchaeota;Stenosarchaea group	MnB_20	SAMN10872768	PRJNA520935	Scaffold	3.58555	40.6		VEPM01	68	3539	2020-04-03T00:00:00Z	ftp://ftp.ncbi.nlm.nih.gov/genomes/all/GCA/012/026/795/GCA_012026795.1_ASM1202679v1
GCA_023249105.1	d__Archaea;p__Halobacteriota;c__Methanosarcinia;o__Methanosarcinales;f__Methanoperedenaceae;g__Methanoperedens;s__Methanoperedens sp023249105	Candidatus Methanoperedens sp.	Archaea;Euryarchaeota;Stenosarchaea group	nzgw24	SAMN19017198	PRJNA699054	Scaffold	3.28281	42.5		JAHFDG01	134	0	2022-05-06T00:00:00Z	ftp://ftp.ncbi.nlm.nih.gov/genomes/all/GCA/023/249/105/GCA_023249105.1_ASM2324910v1
GCA_023249275.1	d__Archaea;p__Halobacteriota;c__Methanosarcinia;o__Methanosarcinales;f__Methanoperedenaceae;g__Methanoperedens;s__Methanoperedens sp023249275	Candidatus Methanoperedens sp.	Archaea;Euryarchaeota;Stenosarchaea group	nzgw23	SAMN19017187	PRJNA699054	Scaffold	2.14855	44.2		JAHFCV01	219	0	2022-05-06T00:00:00Z	ftp://ftp.ncbi.nlm.nih.gov/genomes/all/GCA/023/249/275/GCA_023249275.1_ASM2324927v1
GCA_013331375.1	d__Archaea;p__Halobacteriota;c__Methanosarcinia;o__Methanosarcinales;f__Methanoperedenaceae;g__UBA10536;s__UBA10536 sp10536u	Candidatus Methanoperedenaceae archaeon	Archaea;Euryarchaeota;Stenosarchaea group	UBA10536	SAMN13192964	PRJNA593905	Scaffold	1.64841	52.2		DUGO01	251	1960	2020-06-11T00:00:00Z	ftp://ftp.ncbi.nlm.nih.gov/genomes/all/GCA/013/331/375/GCA_013331375.1_ASM1333137v1
GCA_020793555.1	d__Archaea;p__Halobacteriota;c__Methanosarcinia;o__Methanosarcinales;f__Methanosarcinaceae;g__DQIP01;s__DQIP01 sp020793555	Methanosarcinaceae archaeon	Archaea;Euryarchaeota;Stenosarchaea group	HMMV2	SAMN08574239	PRJNA431796	Scaffold	2.55714	40.7		DQIO01	334	2516	2021-11-08T00:00:00Z	ftp://ftp.ncbi.nlm.nih.gov/genomes/all/GCA/020/793/555/GCA_020793555.1_ASM2079355v1
GCA_023544565.1	d__Archaea;p__Halobacteriota;c__Methanosarcinia;o__Methanosarcinales;f__Methanosarcinaceae;g__DQIP01;s__DQIP01 sp023544565	Methanosarcinaceae archaeon	Archaea;Euryarchaeota;Stenosarchaea group	B4-05	SAMN28014432	PRJNA833668	Scaffold	1.77702	41.3		JAMJFS01	72	1805	2022-05-24T00:00:00Z	ftp://ftp.ncbi.nlm.nih.gov/genomes/all/GCA/023/544/565/GCA_023544565.1_ASM2354456v1
GCA_021129955.1	d__Archaea;p__Halobacteriota;c__Methanosarcinia;o__Methanosarcinales;f__Methanosarcinaceae;g__JAAXQB01;s__JAAXQB01 sp012329085	Methanosarcinaceae archaeon	Archaea;Euryarchaeota;Stenosarchaea group	MAG-1276	SAMN23474158	PRJNA779602	Scaffold	1.38301	29.8		JAJOKH01	531	1301	2021-12-08T00:00:00Z	ftp://ftp.ncbi.nlm.nih.gov/genomes/all/GCA/021/129/955/GCA_021129955.1_ASM2112995v1
GCA_004363215.1	d__Archaea;p__Halobacteriota;c__Methanosarcinia;o__Methanosarcinales;f__Methanosarcinaceae;g__Methanimicrococcus;s__Methanimicrococcus blatticola	Methanimicrococcus blatticola	Archaea;Euryarchaeota;Stenosarchaea group	DSM 13328	SAMN08769569	PRJNA439858	Scaffold	1.78332	42		SNYS01	13	1588	2019-03-22T00:00:00Z	ftp://ftp.ncbi.nlm.nih.gov/genomes/all/GCA/004/363/215/GCA_004363215.1_ASM436321v1	ftp://ftp.ncbi.nlm.nih.gov/genomes/all/GCF/004/363/215/GCF_004363215.1_ASM436321v1
GCA_020685265.1	d__Archaea;p__Halobacteriota;c__Methanosarcinia;o__Methanosarcinales;f__Methanosarcinaceae;g__Methanimicrococcus;s__Methanimicrococcus blatticola	Methanimicrococcus blatticola	Archaea;Euryarchaeota;Stenosarchaea group	PA	SAMN22513950	PRJNA773845	Scaffold	1.77844	42		JAJENP01	6	1582	2021-10-31T00:00:00Z	ftp://ftp.ncbi.nlm.nih.gov/genomes/all/GCA/020/685/265/GCA_020685265.1_ASM2068526v1	ftp://ftp.ncbi.nlm.nih.gov/genomes/all/GCF/020/685/265/GCF_020685265.1_ASM2068526v1
GCA_000013725.1	d__Archaea;p__Halobacteriota;c__Methanosarcinia;o__Methanosarcinales;f__Methanosarcinaceae;g__Methanococcoides;s__Methanococcoides burtonii	Methanococcoides burtonii DSM 6242	Archaea;Euryarchaeota;Stenosarchaea group	DSM 6242	SAMN02598545	PRJNA9634	Complete	2.57503	40.8	chromosome:NC_007955.1/CP000300.1		1	2449	2006-04-10T00:00:00Z	ftp://ftp.ncbi.nlm.nih.gov/genomes/all/GCA/000/013/725/GCA_000013725.1_ASM1372v1	ftp://ftp.ncbi.nlm.nih.gov/genomes/all/GCF/000/013/725/GCF_000013725.1_ASM1372v1
GCA_000970325.1	d__Archaea;p__Halobacteriota;c__Methanosarcinia;o__Methanosarcinales;f__Methanosarcinaceae;g__Methanococcoides;s__Methanococcoides methylutens_A	Methanococcoides methylutens MM1	Archaea;Euryarchaeota;Stenosarchaea group	MM1	SAMN03074571	PRJNA230935	Complete	2.39464	44	chromosome:NZ_CP009518.1/CP009518.1		1	2273	2015-04-07T00:00:00Z	ftp://ftp.ncbi.nlm.nih.gov/genomes/all/GCA/000/970/325/GCA_000970325.1_ASM97032v1	ftp://ftp.ncbi.nlm.nih.gov/genomes/all/GCF/000/970/325/GCF_000970325.1_ASM97032v1
GCA_023684405.1	d__Archaea;p__Halobacteriota;c__Methanosarcinia;o__Methanosarcinales;f__Methanosarcinaceae;g__Methanococcoides;s__Methanococcoides seepicolus	Methanococcoides seepicolus	Archaea;Euryarchaeota;Stenosarchaea group	LLY	SAMN18795806	PRJNA722826	Scaffold	2.8039	41.7		JAGSOI01	158	2645	2022-06-08T00:00:00Z	ftp://ftp.ncbi.nlm.nih.gov/genomes/all/GCA/023/684/405/GCA_023684405.1_ASM2368440v1	ftp://ftp.ncbi.nlm.nih.gov/genomes/all/GCF/023/684/405/GCF_023684405.1_ASM2368440v1
GCA_900111645.1	d__Archaea;p__Halobacteriota;c__Methanosarcinia;o__Methanosarcinales;f__Methanosarcinaceae;g__Methanococcoides;s__Methanococcoides vulcani	Methanococcoides vulcani	Archaea;Euryarchaeota;Stenosarchaea group	SLH 33	SAMN04488587	PRJEB17066	Scaffold	2.31485	43.4		FOHQ01	15	2206	2016-10-29T00:00:00Z	ftp://ftp.ncbi.nlm.nih.gov/genomes/all/GCA/900/111/645/GCA_900111645.1_IMG-taxon_2642422537_annotated_assembly	ftp://ftp.ncbi.nlm.nih.gov/genomes/all/GCF/900/111/645/GCF_900111645.1_IMG-taxon_2642422537_annotated_assembly
GCA_000196655.1	d__Archaea;p__Halobacteriota;c__Methanosarcinia;o__Methanosarcinales;f__Methanosarcinaceae;g__Methanohalobium;s__Methanohalobium evestigatum	Methanohalobium evestigatum Z-7303	Archaea;Euryarchaeota;Stenosarchaea group	Z-7303	SAMN00015125	PRJNA37945	Complete	2.40623	36.3956	chromosome:NC_014253.1/CP002069.1; plasmid pMETEV01:NC_014254.1/CP002070.1		2	2326	2010-06-15T00:00:00Z	ftp://ftp.ncbi.nlm.nih.gov/genomes/all/GCA/000/196/655/GCA_000196655.1_ASM19665v1	ftp://ftp.ncbi.nlm.nih.gov/genomes/all/GCF/000/196/655/GCF_000196655.1_ASM19665v1
GCA_001889405.1	d__Archaea;p__Halobacteriota;c__Methanosarcinia;o__Methanosarcinales;f__Methanosarcinaceae;g__Methanohalophilus;s__Methanohalophilus halophilus	Methanohalophilus halophilus	Archaea;Euryarchaeota;Stenosarchaea group	Z-7982	SAMN05756399	PRJNA342410	Complete	2.02296	42.4	chromosome:NZ_CP017921.1/CP017921.1		1	2011	2016-12-06T00:00:00Z	ftp://ftp.ncbi.nlm.nih.gov/genomes/all/GCA/001/889/405/GCA_001889405.1_ASM188940v1	ftp://ftp.ncbi.nlm.nih.gov/genomes/all/GCF/001/889/405/GCF_001889405.1_ASM188940v1
GCA_000025865.1	d__Archaea;p__Halobacteriota;c__Methanosarcinia;o__Methanosarcinales;f__Methanosarcinaceae;g__Methanohalophilus;s__Methanohalophilus mahii	Methanohalophilus mahii DSM 5219	Archaea;Euryarchaeota;Stenosarchaea group	DSM 5219	SAMN02598474	PRJNA30711	Complete	2.01242	42.6	chromosome:NC_014002.1/CP001994.1		1	1973	2010-03-31T00:00:00Z	ftp://ftp.ncbi.nlm.nih.gov/genomes/all/GCA/000/025/865/GCA_000025865.1_ASM2586v1	ftp://ftp.ncbi.nlm.nih.gov/genomes/all/GCF/000/025/865/GCF_000025865.1_ASM2586v1
GCA_002761295.1	d__Archaea;p__Halobacteriota;c__Methanosarcinia;o__Methanosarcinales;f__Methanosarcinaceae;g__Methanohalophilus;s__Methanohalophilus portucalensis	Methanohalophilus portucalensis	Archaea;Euryarchaeota;Stenosarchaea group	FDF-1T	SAMN05908879	PRJNA348536	Chromosome	2.08498	42	chromosome:NZ_CP017881.1/CP017881.1		1	2070	2017-11-07T00:00:00Z	ftp://ftp.ncbi.nlm.nih.gov/genomes/all/GCA/002/761/295/GCA_002761295.1_ASM276129v1	ftp://ftp.ncbi.nlm.nih.gov/genomes/all/GCF/002/761/295/GCF_002761295.1_ASM276129v1
GCA_001888095.1	d__Archaea;p__Halobacteriota;c__Methanosarcinia;o__Methanosarcinales;f__Methanosarcinaceae;g__Methanohalophilus;s__Methanohalophilus portucalensis	Methanohalophilus portucalensis FDF-1	Archaea;Euryarchaeota;Stenosarchaea group	FDF-1	SAMN03100365	PRJNA263421	Scaffold	1.99045	42.1		JWTK01	15	1994	2016-12-02T00:00:00Z	ftp://ftp.ncbi.nlm.nih.gov/genomes/all/GCA/001/888/095/GCA_001888095.1_ASM188809v1	ftp://ftp.ncbi.nlm.nih.gov/genomes/all/GCF/001/888/095/GCF_001888095.1_ASM188809v1
GCA_004137855.1	d__Archaea;p__Halobacteriota;c__Methanosarcinia;o__Methanosarcinales;f__Methanosarcinaceae;g__Methanohalophilus;s__Methanohalophilus profundi	Methanohalophilus profundi	Archaea;Euryarchaeota;Stenosarchaea group	SLHTYRO	SAMN08804086	PRJNA445966	Scaffold	1.83009	42.7		QBKB01	4	1792	2019-02-05T00:00:00Z	ftp://ftp.ncbi.nlm.nih.gov/genomes/all/GCA/004/137/855/GCA_004137855.1_ASM413785v1	ftp://ftp.ncbi.nlm.nih.gov/genomes/all/GCF/004/137/855/GCF_004137855.1_ASM413785v1
GCA_900114835.1	d__Archaea;p__Halobacteriota;c__Methanosarcinia;o__Methanosarcinales;f__Methanosarcinaceae;g__Methanolobus;s__Methanolobus profundi	Methanolobus profundi	Archaea;Euryarchaeota;Stenosarchaea group	Mob M	SAMN04488696	PRJEB17486	Scaffold	3.1072	42.6		FOUJ01	18	2881	2016-10-31T00:00:00Z	ftp://ftp.ncbi.nlm.nih.gov/genomes/all/GCA/900/114/835/GCA_900114835.1_IMG-taxon_2642422540_annotated_assembly	ftp://ftp.ncbi.nlm.nih.gov/genomes/all/GCF/900/114/835/GCF_900114835.1_IMG-taxon_2642422540_annotated_assembly
GCA_000306725.1	d__Archaea;p__Halobacteriota;c__Methanosarcinia;o__Methanosarcinales;f__Methanosarcinaceae;g__Methanolobus;s__Methanolobus psychrophilus	Methanolobus psychrophilus R15	Archaea;Euryarchaeota;Stenosarchaea group	R15	SAMN00739943	PRJNA74005	Complete	3.07277	44.6	chromosome:CP003083.1		1	3167	2012-10-18T00:00:00Z	ftp://ftp.ncbi.nlm.nih.gov/genomes/all/GCA/000/306/725/GCA_000306725.1_ASM30672v1	ftp://ftp.ncbi.nlm.nih.gov/genomes/all/GCF/000/306/725/GCF_000306725.1_ASM30672v1
GCA_002501695.1	d__Archaea;p__Halobacteriota;c__Methanosarcinia;o__Methanosarcinales;f__Methanosarcinaceae;g__Methanolobus;s__Methanolobus sp002501695	Methanolobus sp. UBA474	Archaea;Euryarchaeota;Stenosarchaea group	UBA474	SAMN06027622	PRJNA348753	Scaffold	2.30653	47.2		DANZ01	163	0	2017-10-10T00:00:00Z	ftp://ftp.ncbi.nlm.nih.gov/genomes/all/GCA/002/501/695/GCA_002501695.1_ASM250169v1
GCA_002507205.1	d__Archaea;p__Halobacteriota;c__Methanosarcinia;o__Methanosarcinales;f__Methanosarcinaceae;g__Methanolobus;s__Methanolobus sp002507205	Methanolobus sp. UBA32	Archaea;Euryarchaeota;Stenosarchaea group	UBA32	SAMN06027367	PRJNA348753	Scaffold	2.32658	42.3		DAZF01	83	0	2017-10-10T00:00:00Z	ftp://ftp.ncbi.nlm.nih.gov/genomes/all/GCA/002/507/205/GCA_002507205.1_ASM250720v1
GCA_002508635.1	d__Archaea;p__Halobacteriota;c__Methanosarcinia;o__Methanosarcinales;f__Methanosarcinaceae;g__Methanolobus;s__Methanolobus sp002508635	Methanolobus sp. UBA118	Archaea;Euryarchaeota;Stenosarchaea group	UBA118	SAMN06027412	PRJNA348753	Scaffold	1.97116	43		DACO01	201	0	2017-10-11T00:00:00Z	ftp://ftp.ncbi.nlm.nih.gov/genomes/all/GCA/002/508/635/GCA_002508635.1_ASM250863v1
GCA_016278365.1	d__Archaea;p__Halobacteriota;c__Methanosarcinia;o__Methanosarcinales;f__Methanosarcinaceae;g__Methanolobus;s__Methanolobus sp016278365	Methanolobus sp.	Archaea;Euryarchaeota;Stenosarchaea group	Soudan_28	SAMN16091057	PRJNA248749	Scaffold	2.8695	44.4		JADQBZ01	19	0	2020-12-22T00:00:00Z	ftp://ftp.ncbi.nlm.nih.gov/genomes/all/GCA/016/278/365/GCA_016278365.1_ASM1627836v1
GCA_016278385.1	d__Archaea;p__Halobacteriota;c__Methanosarcinia;o__Methanosarcinales;f__Methanosarcinaceae;g__Methanolobus;s__Methanolobus sp016278385	Methanolobus sp.	Archaea;Euryarchaeota;Stenosarchaea group	Soudan_27	SAMN16091056	PRJNA248749	Scaffold	2.87562	40.2		JADQBY01	52	0	2020-12-22T00:00:00Z	ftp://ftp.ncbi.nlm.nih.gov/genomes/all/GCA/016/278/385/GCA_016278385.1_ASM1627838v1
GCA_020055655.1	d__Archaea;p__Halobacteriota;c__Methanosarcinia;o__Methanosarcinales;f__Methanosarcinaceae;g__Methanolobus;s__Methanolobus sp020055655	Methanosarcinaceae archaeon	Archaea;Euryarchaeota;Stenosarchaea group	SBSPR1A	SAMN21160264	PRJNA365332	Scaffold	2.4762	39.6		JAIPUR01	48	0	2021-09-20T00:00:00Z	ftp://ftp.ncbi.nlm.nih.gov/genomes/all/GCA/020/055/655/GCA_020055655.1_ASM2005565v1
GCA_900100715.1	d__Archaea;p__Halobacteriota;c__Methanosarcinia;o__Methanosarcinales;f__Methanosarcinaceae;g__Methanolobus;s__Methanolobus vulcani	Methanolobus vulcani	Archaea;Euryarchaeota;Stenosarchaea group	PL 12/M	SAMN04488589	PRJEB15876	Scaffold	2.94791	40.3		FNCA01	20	2793	2016-10-20T00:00:00Z	ftp://ftp.ncbi.nlm.nih.gov/genomes/all/GCA/900/100/715/GCA_900100715.1_IMG-taxon_2642422561_annotated_assembly	ftp://ftp.ncbi.nlm.nih.gov/genomes/all/GCF/900/100/715/GCF_900100715.1_IMG-taxon_2642422561_annotated_assembly
GCA_000328665.1	d__Archaea;p__Halobacteriota;c__Methanosarcinia;o__Methanosarcinales;f__Methanosarcinaceae;g__Methanomethylovorans;s__Methanomethylovorans hollandica	Methanomethylovorans hollandica DSM 15978	Archaea;Euryarchaeota;Stenosarchaea group	DSM 15978	SAMN02261367	PRJNA50749	Complete	2.71401	41.8436	chromosome:NC_019977.1/CP003362.1; plasmid pMETHO01:NC_019972.1/CP003363.1		2	2564	2012-12-28T00:00:00Z	ftp://ftp.ncbi.nlm.nih.gov/genomes/all/GCA/000/328/665/GCA_000328665.1_ASM32866v1	ftp://ftp.ncbi.nlm.nih.gov/genomes/all/GCF/000/328/665/GCF_000328665.1_ASM32866v1
GCA_002503365.1	d__Archaea;p__Halobacteriota;c__Methanosarcinia;o__Methanosarcinales;f__Methanosarcinaceae;g__Methanomethylovorans;s__Methanomethylovorans hollandica	Methanosarcinaceae archaeon UBA282	Archaea;Euryarchaeota;Stenosarchaea group	UBA282	SAMN06027067	PRJNA348753	Scaffold	2.06308	42.8		DARN01	160	0	2017-10-10T00:00:00Z	ftp://ftp.ncbi.nlm.nih.gov/genomes/all/GCA/002/503/365/GCA_002503365.1_ASM250336v1
GCA_002508385.1	d__Archaea;p__Halobacteriota;c__Methanosarcinia;o__Methanosarcinales;f__Methanosarcinaceae;g__Methanomethylovorans;s__Methanomethylovorans hollandica	Methanosarcinaceae archaeon UBA151	Archaea;Euryarchaeota;Stenosarchaea group	UBA151	SAMN06027503	PRJNA348753	Scaffold	2.04732	42.8		DAHZ01	169	0	2017-10-11T00:00:00Z	ftp://ftp.ncbi.nlm.nih.gov/genomes/all/GCA/002/508/385/GCA_002508385.1_ASM250838v1
GCA_002508425.1	d__Archaea;p__Halobacteriota;c__Methanosarcinia;o__Methanosarcinales;f__Methanosarcinaceae;g__Methanomethylovorans;s__Methanomethylovorans sp002508425	Methanosarcinaceae archaeon UBA470	Archaea;Euryarchaeota;Stenosarchaea group	UBA470	SAMN06027602	PRJNA348753	Scaffold	2.46599	41		DAKU01	182	0	2017-10-11T00:00:00Z	ftp://ftp.ncbi.nlm.nih.gov/genomes/all/GCA/002/508/425/GCA_002508425.1_ASM250842v1
GCA_000217995.1	d__Archaea;p__Halobacteriota;c__Methanosarcinia;o__Methanosarcinales;f__Methanosarcinaceae;g__Methanosalsum;s__Methanosalsum zhilinae	Methanosalsum zhilinae DSM 4017	Archaea;Euryarchaeota;Stenosarchaea group	DSM 4017	SAMN02232039	PRJNA40771	Complete	2.13844	39.2	chromosome:NC_015676.1/CP002101.1		1	1977	2011-06-13T00:00:00Z	ftp://ftp.ncbi.nlm.nih.gov/genomes/all/GCA/000/217/995/GCA_000217995.1_ASM21799v1	ftp://ftp.ncbi.nlm.nih.gov/genomes/all/GCF/000/217/995/GCF_000217995.1_ASM21799v1
GCA_000007345.1	d__Archaea;p__Halobacteriota;c__Methanosarcinia;o__Methanosarcinales;f__Methanosarcinaceae;g__Methanosarcina;s__Methanosarcina acetivorans	Methanosarcina acetivorans C2A	Archaea;Euryarchaeota;Stenosarchaea group	C2A	SAMN03081414	PRJNA290	Complete	5.75149	42.7	chromosome:NC_003552.1/AE010299.1		1	4613	2002-03-20T00:00:00Z	ftp://ftp.ncbi.nlm.nih.gov/genomes/all/GCA/000/007/345/GCA_000007345.1_ASM734v1	ftp://ftp.ncbi.nlm.nih.gov/genomes/all/GCF/000/007/345/GCF_000007345.1_ASM734v1
GCA_013329655.1	d__Archaea;p__Halobacteriota;c__Methanosarcinia;o__Methanosarcinales;f__Methanosarcinaceae;g__Methanosarcina;s__Methanosarcina acetivorans	Methanosarcina acetivorans	Archaea;Euryarchaeota;Stenosarchaea group	UBA8876	SAMN13193048	PRJNA593905	Scaffold	4.25736	43.5		DUJU01	201	3391	2020-06-11T00:00:00Z	ftp://ftp.ncbi.nlm.nih.gov/genomes/all/GCA/013/329/655/GCA_013329655.1_ASM1332965v1
GCA_000970065.1	d__Archaea;p__Halobacteriota;c__Methanosarcinia;o__Methanosarcinales;f__Methanosarcinaceae;g__Methanosarcina;s__Methanosarcina barkeri	Methanosarcina barkeri 227	Archaea;Euryarchaeota;Stenosarchaea group	227	SAMN03074573	PRJNA230937	Complete	4.48757	39.2691	chromosome:NZ_CP009530.1/CP009530.1; plasmid unnamed:NZ_CP009529.1/CP009529.1		2	3517	2015-04-07T00:00:00Z	ftp://ftp.ncbi.nlm.nih.gov/genomes/all/GCA/000/970/065/GCA_000970065.1_ASM97006v1	ftp://ftp.ncbi.nlm.nih.gov/genomes/all/GCF/000/970/065/GCF_000970065.1_ASM97006v1
GCA_000970025.1	d__Archaea;p__Halobacteriota;c__Methanosarcinia;o__Methanosarcinales;f__Methanosarcinaceae;g__Methanosarcina;s__Methanosarcina barkeri	Methanosarcina barkeri MS	Archaea;Euryarchaeota;Stenosarchaea group	MS	SAMN03074575	PRJNA230939	Complete	4.57491	39.169	chromosome:NZ_CP009528.1/CP009528.1; plasmid unnamed:NZ_CP009527.1/CP009527.1		2	3568	2015-04-07T00:00:00Z	ftp://ftp.ncbi.nlm.nih.gov/genomes/all/GCA/000/970/025/GCA_000970025.1_ASM97002v1	ftp://ftp.ncbi.nlm.nih.gov/genomes/all/GCF/000/970/025/GCF_000970025.1_ASM97002v1
GCA_001027005.1	d__Archaea;p__Halobacteriota;c__Methanosarcinia;o__Methanosarcinales;f__Methanosarcinaceae;g__Methanosarcina;s__Methanosarcina barkeri	Methanosarcina barkeri CM1	Archaea;Euryarchaeota;Stenosarchaea group	CM1	SAMN02866457	PRJNA49587	Complete	4.50117	39.2	chromosome:NZ_CP008746.1/CP008746.1		1	3531	2015-06-03T00:00:00Z	ftp://ftp.ncbi.nlm.nih.gov/genomes/all/GCA/001/027/005/GCA_001027005.1_ASM102700v1	ftp://ftp.ncbi.nlm.nih.gov/genomes/all/GCF/001/027/005/GCF_001027005.1_ASM102700v1
GCA_000970305.1	d__Archaea;p__Halobacteriota;c__Methanosarcinia;o__Methanosarcinales;f__Methanosarcinaceae;g__Methanosarcina;s__Methanosarcina barkeri_A	Methanosarcina barkeri 3	Archaea;Euryarchaeota;Stenosarchaea group	3	SAMN03074574	PRJNA230938	Complete	4.56045	39.1	chromosome:NZ_CP009517.1/CP009517.1		1	3660	2015-04-07T00:00:00Z	ftp://ftp.ncbi.nlm.nih.gov/genomes/all/GCA/000/970/305/GCA_000970305.1_ASM97030v1	ftp://ftp.ncbi.nlm.nih.gov/genomes/all/GCF/000/970/305/GCF_000970305.1_ASM97030v1
GCA_000969985.1	d__Archaea;p__Halobacteriota;c__Methanosarcinia;o__Methanosarcinales;f__Methanosarcinaceae;g__Methanosarcina;s__Methanosarcina barkeri_B	Methanosarcina barkeri str. Wiesmoor	Archaea;Euryarchaeota;Stenosarchaea group	Wiesmoor	SAMN03074576	PRJNA230940	Complete	4.90719	39.267	chromosome:NZ_CP009526.1/CP009526.1; plasmid unnamed:NZ_CP009525.1/CP009525.1		2	3782	2015-04-07T00:00:00Z	ftp://ftp.ncbi.nlm.nih.gov/genomes/all/GCA/000/969/985/GCA_000969985.1_ASM96998v1	ftp://ftp.ncbi.nlm.nih.gov/genomes/all/GCF/000/969/985/GCF_000969985.1_ASM96998v1
GCA_023248885.1	d__Archaea;p__Halobacteriota;c__Methanosarcinia;o__Methanosarcinales;f__Methanosarcinaceae;g__Methanosarcina;s__Methanosarcina barkeri_C	Methanosarcina sp.	Archaea;Euryarchaeota;Stenosarchaea group	nzgw25	SAMN19017209	PRJNA699054	Scaffold	1.507	43.7		JAHFDR01	425	0	2022-05-06T00:00:00Z	ftp://ftp.ncbi.nlm.nih.gov/genomes/all/GCA/023/248/885/GCA_023248885.1_ASM2324888v1
GCA_000970285.1	d__Archaea;p__Halobacteriota;c__Methanosarcinia;o__Methanosarcinales;f__Methanosarcinaceae;g__Methanosarcina;s__Methanosarcina horonobensis	Methanosarcina horonobensis HB-1 = JCM 15518	Archaea;Euryarchaeota;Stenosarchaea group	HB-1	SAMN03074578	PRJNA230942	Complete	5.01861	41.3	chromosome:NZ_CP009516.1/CP009516.1		1	4294	2015-04-07T00:00:00Z	ftp://ftp.ncbi.nlm.nih.gov/genomes/all/GCA/000/970/285/GCA_000970285.1_ASM97028v1	ftp://ftp.ncbi.nlm.nih.gov/genomes/all/GCF/000/970/285/GCF_000970285.1_ASM97028v1
GCA_000970265.1	d__Archaea;p__Halobacteriota;c__Methanosarcinia;o__Methanosarcinales;f__Methanosarcinaceae;g__Methanosarcina;s__Methanosarcina lacustris	Methanosarcina lacustris Z-7289	Archaea;Euryarchaeota;Stenosarchaea group	Z-7289	SAMN03074579	PRJNA230943	Complete	4.13981	41.8	chromosome:NZ_CP009515.1/CP009515.1		1	3272	2015-04-07T00:00:00Z	ftp://ftp.ncbi.nlm.nih.gov/genomes/all/GCA/000/970/265/GCA_000970265.1_ASM97026v1	ftp://ftp.ncbi.nlm.nih.gov/genomes/all/GCF/000/970/265/GCF_000970265.1_ASM97026v1
GCA_000007065.1	d__Archaea;p__Halobacteriota;c__Methanosarcinia;o__Methanosarcinales;f__Methanosarcinaceae;g__Methanosarcina;s__Methanosarcina mazei	Methanosarcina mazei Go1	Archaea;Euryarchaeota;Stenosarchaea group	Go1	SAMN02603290	PRJNA300	Complete	4.09635	41.5	chromosome:NC_003901.1/AE008384.1		1	3349	2001-08-22T00:00:00Z	ftp://ftp.ncbi.nlm.nih.gov/genomes/all/GCA/000/007/065/GCA_000007065.1_ASM706v1	ftp://ftp.ncbi.nlm.nih.gov/genomes/all/GCF/000/007/065/GCF_000007065.1_ASM706v1
GCA_000970205.1	d__Archaea;p__Halobacteriota;c__Methanosarcinia;o__Methanosarcinales;f__Methanosarcinaceae;g__Methanosarcina;s__Methanosarcina mazei	Methanosarcina mazei S-6	Archaea;Euryarchaeota;Stenosarchaea group	S-6	SAMN03074583	PRJNA230947	Complete	4.14282	41.4	chromosome:NZ_CP009512.1/CP009512.1		1	3392	2015-04-07T00:00:00Z	ftp://ftp.ncbi.nlm.nih.gov/genomes/all/GCA/000/970/205/GCA_000970205.1_ASM97020v1	ftp://ftp.ncbi.nlm.nih.gov/genomes/all/GCF/000/970/205/GCF_000970205.1_ASM97020v1
GCA_019669945.1	d__Archaea;p__Halobacteriota;c__Methanosarcinia;o__Methanosarcinales;f__Methanosarcinaceae;g__Methanosarcina;s__Methanosarcina mazei	Methanosarcina mazei	Archaea;Euryarchaeota;Stenosarchaea group	TMA	SAMD00171895	PRJDB8302	Complete	4.41713	41.2	chromosome:NZ_AP019780.1/AP019780.1		1	3485	2021-06-02T00:00:00Z	ftp://ftp.ncbi.nlm.nih.gov/genomes/all/GCA/019/669/945/GCA_019669945.1_ASM1966994v1	ftp://ftp.ncbi.nlm.nih.gov/genomes/all/GCF/019/669/945/GCF_019669945.1_ASM1966994v1
GCA_010706455.1	d__Archaea;p__Halobacteriota;c__Methanosarcinia;o__Methanosarcinales;f__Methanosarcinaceae;g__Methanosarcina;s__Methanosarcina mazei	Methanosarcina mazei	Archaea;Euryarchaeota;Stenosarchaea group	zm-15	SAMN12565415	PRJNA557089	Complete	4.32315	41.2	chromosome:NZ_CP042908.1/CP042908.1		1	3497	2020-02-18T00:00:00Z	ftp://ftp.ncbi.nlm.nih.gov/genomes/all/GCA/010/706/455/GCA_010706455.1_ASM1070645v1	ftp://ftp.ncbi.nlm.nih.gov/genomes/all/GCF/010/706/455/GCF_010706455.1_ASM1070645v1
GCA_000970225.1	d__Archaea;p__Halobacteriota;c__Methanosarcinia;o__Methanosarcinales;f__Methanosarcinaceae;g__Methanosarcina;s__Methanosarcina mazei	Methanosarcina mazei LYC	Archaea;Euryarchaeota;Stenosarchaea group	LYC	SAMN03074582	PRJNA230946	Complete	4.15434	41.4	chromosome:NZ_CP009513.1/CP009513.1		1	3409	2015-04-07T00:00:00Z	ftp://ftp.ncbi.nlm.nih.gov/genomes/all/GCA/000/970/225/GCA_000970225.1_ASM97022v1	ftp://ftp.ncbi.nlm.nih.gov/genomes/all/GCF/000/970/225/GCF_000970225.1_ASM97022v1
GCA_000970165.1	d__Archaea;p__Halobacteriota;c__Methanosarcinia;o__Methanosarcinales;f__Methanosarcinaceae;g__Methanosarcina;s__Methanosarcina mazei	Methanosarcina mazei WWM610	Archaea;Euryarchaeota;Stenosarchaea group	WWM610	SAMN03074586	PRJNA230950	Complete	4.09648	41.5	chromosome:NZ_CP009509.1/CP009509.1		1	3345	2015-04-07T00:00:00Z	ftp://ftp.ncbi.nlm.nih.gov/genomes/all/GCA/000/970/165/GCA_000970165.1_ASM97016v1	ftp://ftp.ncbi.nlm.nih.gov/genomes/all/GCF/000/970/165/GCF_000970165.1_ASM97016v1
GCA_000970185.1	d__Archaea;p__Halobacteriota;c__Methanosarcinia;o__Methanosarcinales;f__Methanosarcinaceae;g__Methanosarcina;s__Methanosarcina mazei	Methanosarcina mazei SarPi	Archaea;Euryarchaeota;Stenosarchaea group	SarPi	SAMN03074584	PRJNA230948	Complete	4.06655	41.5	chromosome:NZ_CP009511.1/CP009511.1		1	3307	2015-04-07T00:00:00Z	ftp://ftp.ncbi.nlm.nih.gov/genomes/all/GCA/000/970/185/GCA_000970185.1_ASM97018v1	ftp://ftp.ncbi.nlm.nih.gov/genomes/all/GCF/000/970/185/GCF_000970185.1_ASM97018v1
GCA_000341715.1	d__Archaea;p__Halobacteriota;c__Methanosarcinia;o__Methanosarcinales;f__Methanosarcinaceae;g__Methanosarcina;s__Methanosarcina mazei	Methanosarcina mazei Tuc01	Archaea;Euryarchaeota;Stenosarchaea group	Tuc01	SAMN02603746	PRJNA176295	Complete	3.42795	42.5	chromosome:NC_020389.1/CP004144.1		1	2927	2013-02-22T00:00:00Z	ftp://ftp.ncbi.nlm.nih.gov/genomes/all/GCA/000/341/715/GCA_000341715.1_ASM34171v1	ftp://ftp.ncbi.nlm.nih.gov/genomes/all/GCF/000/341/715/GCF_000341715.1_ASM34171v1
GCA_005485005.1	d__Archaea;p__Halobacteriota;c__Methanosarcinia;o__Methanosarcinales;f__Methanosarcinaceae;g__Methanosarcina;s__Methanosarcina mazei	Methanosarcina mazei	Archaea;Euryarchaeota;Stenosarchaea group	JL01	SAMN09222529	PRJNA471916	Chromosome	4.18673	41.7	chromosome:NZ_CP029709.1/CP029709.1		1	3310	2019-05-17T00:00:00Z	ftp://ftp.ncbi.nlm.nih.gov/genomes/all/GCA/005/485/005/GCA_005485005.1_ASM548500v1	ftp://ftp.ncbi.nlm.nih.gov/genomes/all/GCF/005/485/005/GCF_005485005.1_ASM548500v1
GCA_000979105.1	d__Archaea;p__Halobacteriota;c__Methanosarcinia;o__Methanosarcinales;f__Methanosarcinaceae;g__Methanosarcina;s__Methanosarcina mazei	Methanosarcina mazei	Archaea;Euryarchaeota;Stenosarchaea group	1.F.A.1A.3	SAMN02708932	PRJNA242781	Scaffold	4.04946	41.5		JJQA01	124	3348	2015-04-23T00:00:00Z	ftp://ftp.ncbi.nlm.nih.gov/genomes/all/GCA/000/979/105/GCA_000979105.1_gtlEnvA5udCFS	ftp://ftp.ncbi.nlm.nih.gov/genomes/all/GCF/000/979/105/GCF_000979105.1_gtlEnvA5udCFS
GCA_000979345.1	d__Archaea;p__Halobacteriota;c__Methanosarcinia;o__Methanosarcinales;f__Methanosarcinaceae;g__Methanosarcina;s__Methanosarcina mazei	Methanosarcina mazei	Archaea;Euryarchaeota;Stenosarchaea group	2.F.A.2.4	SAMN02708981	PRJNA242781	Scaffold	4.1989	41.6		JJOS01	146	3491	2015-04-23T00:00:00Z	ftp://ftp.ncbi.nlm.nih.gov/genomes/all/GCA/000/979/345/GCA_000979345.1_gtlEnvA5udCFS	ftp://ftp.ncbi.nlm.nih.gov/genomes/all/GCF/000/979/345/GCF_000979345.1_gtlEnvA5udCFS
GCA_000979185.1	d__Archaea;p__Halobacteriota;c__Methanosarcinia;o__Methanosarcinales;f__Methanosarcinaceae;g__Methanosarcina;s__Methanosarcina mazei	Methanosarcina mazei	Archaea;Euryarchaeota;Stenosarchaea group	1.H.A.1A.4	SAMN02708935	PRJNA242781	Scaffold	3.98922	41.6		JJQI01	123	3305	2015-04-23T00:00:00Z	ftp://ftp.ncbi.nlm.nih.gov/genomes/all/GCA/000/979/185/GCA_000979185.1_gtlEnvA5udCFS	ftp://ftp.ncbi.nlm.nih.gov/genomes/all/GCF/000/979/185/GCF_000979185.1_gtlEnvA5udCFS
GCA_000979815.1	d__Archaea;p__Halobacteriota;c__Methanosarcinia;o__Methanosarcinales;f__Methanosarcinaceae;g__Methanosarcina;s__Methanosarcina mazei	Methanosarcina mazei	Archaea;Euryarchaeota;Stenosarchaea group	3.H.T.1A.1	SAMN02708955	PRJNA242781	Scaffold	4.07528	41.5		JJPY01	128	3368	2015-04-23T00:00:00Z	ftp://ftp.ncbi.nlm.nih.gov/genomes/all/GCA/000/979/815/GCA_000979815.1_gtlEnvA5udCFS	ftp://ftp.ncbi.nlm.nih.gov/genomes/all/GCF/000/979/815/GCF_000979815.1_gtlEnvA5udCFS
GCA_000979845.1	d__Archaea;p__Halobacteriota;c__Methanosarcinia;o__Methanosarcinales;f__Methanosarcinaceae;g__Methanosarcina;s__Methanosarcina mazei	Methanosarcina mazei	Archaea;Euryarchaeota;Stenosarchaea group	1.F.A.1B.3	SAMN02708933	PRJNA242781	Scaffold	4.03416	41.6		JJQB01	144	3316	2015-04-23T00:00:00Z	ftp://ftp.ncbi.nlm.nih.gov/genomes/all/GCA/000/979/845/GCA_000979845.1_gtlEnvA5udCFS	ftp://ftp.ncbi.nlm.nih.gov/genomes/all/GCF/000/979/845/GCF_000979845.1_gtlEnvA5udCFS
GCA_000978965.1	d__Archaea;p__Halobacteriota;c__Methanosarcinia;o__Methanosarcinales;f__Methanosarcinaceae;g__Methanosarcina;s__Methanosarcina mazei	Methanosarcina mazei	Archaea;Euryarchaeota;Stenosarchaea group	3.F.T.1A.1	SAMN02708961	PRJNA242781	Scaffold	4.16485	41.5		JJPI01	156	3417	2015-04-23T00:00:00Z	ftp://ftp.ncbi.nlm.nih.gov/genomes/all/GCA/000/978/965/GCA_000978965.1_gtlEnvA5udCFS	ftp://ftp.ncbi.nlm.nih.gov/genomes/all/GCF/000/978/965/GCF_000978965.1_gtlEnvA5udCFS
GCA_000979045.1	d__Archaea;p__Halobacteriota;c__Methanosarcinia;o__Methanosarcinales;f__Methanosarcinaceae;g__Methanosarcina;s__Methanosarcina mazei	Methanosarcina mazei	Archaea;Euryarchaeota;Stenosarchaea group	3.H.M.1B.5	SAMN02708954	PRJNA242781	Scaffold	4.12282	41.5		JJPW01	136	3372	2015-04-23T00:00:00Z	ftp://ftp.ncbi.nlm.nih.gov/genomes/all/GCA/000/979/045/GCA_000979045.1_gtlEnvA5udCFS	ftp://ftp.ncbi.nlm.nih.gov/genomes/all/GCF/000/979/045/GCF_000979045.1_gtlEnvA5udCFS
GCA_000979375.1	d__Archaea;p__Halobacteriota;c__Methanosarcinia;o__Methanosarcinales;f__Methanosarcinaceae;g__Methanosarcina;s__Methanosarcina mazei	Methanosarcina mazei	Archaea;Euryarchaeota;Stenosarchaea group	2.F.T.0.2	SAMN02708943	PRJNA242781	Scaffold	4.0923	41.5		JJOT01	136	3389	2015-04-23T00:00:00Z	ftp://ftp.ncbi.nlm.nih.gov/genomes/all/GCA/000/979/375/GCA_000979375.1_gtlEnvA5udCFS	ftp://ftp.ncbi.nlm.nih.gov/genomes/all/GCF/000/979/375/GCF_000979375.1_gtlEnvA5udCFS
GCA_000979855.1	d__Archaea;p__Halobacteriota;c__Methanosarcinia;o__Methanosarcinales;f__Methanosarcinaceae;g__Methanosarcina;s__Methanosarcina mazei	Methanosarcina mazei	Archaea;Euryarchaeota;Stenosarchaea group	1.F.A.1B.4	SAMN02708966	PRJNA242781	Scaffold	4.05356	41.6		JJQC01	171	3355	2015-04-23T00:00:00Z	ftp://ftp.ncbi.nlm.nih.gov/genomes/all/GCA/000/979/855/GCA_000979855.1_gtlEnvA5udCFS	ftp://ftp.ncbi.nlm.nih.gov/genomes/all/GCF/000/979/855/GCF_000979855.1_gtlEnvA5udCFS
GCA_000978935.1	d__Archaea;p__Halobacteriota;c__Methanosarcinia;o__Methanosarcinales;f__Methanosarcinaceae;g__Methanosarcina;s__Methanosarcina mazei	Methanosarcina mazei	Archaea;Euryarchaeota;Stenosarchaea group	3.F.A.2.5	SAMN02708945	PRJNA242781	Scaffold	4.0682	41.6		JJPF01	146	3353	2015-04-23T00:00:00Z	ftp://ftp.ncbi.nlm.nih.gov/genomes/all/GCA/000/978/935/GCA_000978935.1_gtlEnvA5udCFS	ftp://ftp.ncbi.nlm.nih.gov/genomes/all/GCF/000/978/935/GCF_000978935.1_gtlEnvA5udCFS
GCA_000979125.1	d__Archaea;p__Halobacteriota;c__Methanosarcinia;o__Methanosarcinales;f__Methanosarcinaceae;g__Methanosarcina;s__Methanosarcina mazei	Methanosarcina mazei	Archaea;Euryarchaeota;Stenosarchaea group	1.F.M.0.5	SAMN02708967	PRJNA242781	Scaffold	4.07265	41.6		JJQE01	164	3351	2015-04-23T00:00:00Z	ftp://ftp.ncbi.nlm.nih.gov/genomes/all/GCA/000/979/125/GCA_000979125.1_gtlEnvA5udCFS	ftp://ftp.ncbi.nlm.nih.gov/genomes/all/GCF/000/979/125/GCF_000979125.1_gtlEnvA5udCFS
GCA_000979765.1	d__Archaea;p__Halobacteriota;c__Methanosarcinia;o__Methanosarcinales;f__Methanosarcinaceae;g__Methanosarcina;s__Methanosarcina mazei	Methanosarcina mazei	Archaea;Euryarchaeota;Stenosarchaea group	3.H.M.1B.2	SAMN02708953	PRJNA242781	Scaffold	4.12604	41.5		JJPV01	136	3395	2015-04-23T00:00:00Z	ftp://ftp.ncbi.nlm.nih.gov/genomes/all/GCA/000/979/765/GCA_000979765.1_gtlEnvA5udCFS	ftp://ftp.ncbi.nlm.nih.gov/genomes/all/GCF/000/979/765/GCF_000979765.1_gtlEnvA5udCFS
GCA_000979685.1	d__Archaea;p__Halobacteriota;c__Methanosarcinia;o__Methanosarcinales;f__Methanosarcinaceae;g__Methanosarcina;s__Methanosarcina mazei	Methanosarcina mazei	Archaea;Euryarchaeota;Stenosarchaea group	3.H.A.2.4	SAMN02708963	PRJNA242781	Scaffold	4.12399	41.4		JJPP01	157	3412	2015-04-23T00:00:00Z	ftp://ftp.ncbi.nlm.nih.gov/genomes/all/GCA/000/979/685/GCA_000979685.1_gtlEnvA5udCFS	ftp://ftp.ncbi.nlm.nih.gov/genomes/all/GCF/000/979/685/GCF_000979685.1_gtlEnvA5udCFS
GCA_000979635.1	d__Archaea;p__Halobacteriota;c__Methanosarcinia;o__Methanosarcinales;f__Methanosarcinaceae;g__Methanosarcina;s__Methanosarcina mazei	Methanosarcina mazei	Archaea;Euryarchaeota;Stenosarchaea group	3.F.T.1A.4	SAMN02708949	PRJNA242781	Scaffold	4.16051	41.5		JJPK01	139	3414	2015-04-23T00:00:00Z	ftp://ftp.ncbi.nlm.nih.gov/genomes/all/GCA/000/979/635/GCA_000979635.1_gtlEnvA5udCFS	ftp://ftp.ncbi.nlm.nih.gov/genomes/all/GCF/000/979/635/GCF_000979635.1_gtlEnvA5udCFS
GCA_000980155.1	d__Archaea;p__Halobacteriota;c__Methanosarcinia;o__Methanosarcinales;f__Methanosarcinaceae;g__Methanosarcina;s__Methanosarcina mazei	Methanosarcina mazei	Archaea;Euryarchaeota;Stenosarchaea group	1.H.T.2.3	SAMN02708941	PRJNA242781	Scaffold	3.97212	41.6		JJRA01	148	3279	2015-04-23T00:00:00Z	ftp://ftp.ncbi.nlm.nih.gov/genomes/all/GCA/000/980/155/GCA_000980155.1_gtlEnvA5udCFS	ftp://ftp.ncbi.nlm.nih.gov/genomes/all/GCF/000/980/155/GCF_000980155.1_gtlEnvA5udCFS
GCA_000979585.1	d__Archaea;p__Halobacteriota;c__Methanosarcinia;o__Methanosarcinales;f__Methanosarcinaceae;g__Methanosarcina;s__Methanosarcina mazei	Methanosarcina mazei	Archaea;Euryarchaeota;Stenosarchaea group	3.F.A.2.7	SAMN02708947	PRJNA242781	Scaffold	4.02887	41.6		JJPH01	142	3324	2015-04-23T00:00:00Z	ftp://ftp.ncbi.nlm.nih.gov/genomes/all/GCA/000/979/585/GCA_000979585.1_gtlEnvA5udCFS	ftp://ftp.ncbi.nlm.nih.gov/genomes/all/GCF/000/979/585/GCF_000979585.1_gtlEnvA5udCFS
GCA_000980055.1	d__Archaea;p__Halobacteriota;c__Methanosarcinia;o__Methanosarcinales;f__Methanosarcinaceae;g__Methanosarcina;s__Methanosarcina mazei	Methanosarcina mazei	Archaea;Euryarchaeota;Stenosarchaea group	1.H.M.1A.1	SAMN02708959	PRJNA242781	Scaffold	4.08538	41.6		JJQR01	175	3376	2015-04-23T00:00:00Z	ftp://ftp.ncbi.nlm.nih.gov/genomes/all/GCA/000/980/055/GCA_000980055.1_gtlEnvA5udCFS	ftp://ftp.ncbi.nlm.nih.gov/genomes/all/GCF/000/980/055/GCF_000980055.1_gtlEnvA5udCFS
GCA_000979255.1	d__Archaea;p__Halobacteriota;c__Methanosarcinia;o__Methanosarcinales;f__Methanosarcinaceae;g__Methanosarcina;s__Methanosarcina mazei	Methanosarcina mazei	Archaea;Euryarchaeota;Stenosarchaea group	1.H.M.1A.2	SAMN02708938	PRJNA242781	Scaffold	4.08122	41.6		JJQS01	155	3362	2015-04-23T00:00:00Z	ftp://ftp.ncbi.nlm.nih.gov/genomes/all/GCA/000/979/255/GCA_000979255.1_gtlEnvA5udCFS	ftp://ftp.ncbi.nlm.nih.gov/genomes/all/GCF/000/979/255/GCF_000979255.1_gtlEnvA5udCFS
GCA_000980175.1	d__Archaea;p__Halobacteriota;c__Methanosarcinia;o__Methanosarcinales;f__Methanosarcinaceae;g__Methanosarcina;s__Methanosarcina mazei	Methanosarcina mazei	Archaea;Euryarchaeota;Stenosarchaea group	1.H.T.2.5	SAMN02708942	PRJNA242781	Scaffold	4.08598	41.6		JJRB01	142	3368	2015-04-23T00:00:00Z	ftp://ftp.ncbi.nlm.nih.gov/genomes/all/GCA/000/980/175/GCA_000980175.1_gtlEnvA5udCFS	ftp://ftp.ncbi.nlm.nih.gov/genomes/all/GCF/000/980/175/GCF_000980175.1_gtlEnvA5udCFS
GCA_000979195.1	d__Archaea;p__Halobacteriota;c__Methanosarcinia;o__Methanosarcinales;f__Methanosarcinaceae;g__Methanosarcina;s__Methanosarcina mazei	Methanosarcina mazei	Archaea;Euryarchaeota;Stenosarchaea group	1.H.A.2.3	SAMN02708936	PRJNA242781	Scaffold	4.0917	41.6		JJQM01	171	3364	2015-04-23T00:00:00Z	ftp://ftp.ncbi.nlm.nih.gov/genomes/all/GCA/000/979/195/GCA_000979195.1_gtlEnvA5udCFS	ftp://ftp.ncbi.nlm.nih.gov/genomes/all/GCF/000/979/195/GCF_000979195.1_gtlEnvA5udCFS
GCA_000979595.1	d__Archaea;p__Halobacteriota;c__Methanosarcinia;o__Methanosarcinales;f__Methanosarcinaceae;g__Methanosarcina;s__Methanosarcina mazei	Methanosarcina mazei	Archaea;Euryarchaeota;Stenosarchaea group	3.F.T.1A.2	SAMN02708948	PRJNA242781	Scaffold	4.15797	41.5		JJPJ01	163	3417	2015-04-23T00:00:00Z	ftp://ftp.ncbi.nlm.nih.gov/genomes/all/GCA/000/979/595/GCA_000979595.1_gtlEnvA5udCFS	ftp://ftp.ncbi.nlm.nih.gov/genomes/all/GCF/000/979/595/GCF_000979595.1_gtlEnvA5udCFS
GCA_000979505.1	d__Archaea;p__Halobacteriota;c__Methanosarcinia;o__Methanosarcinales;f__Methanosarcinaceae;g__Methanosarcina;s__Methanosarcina mazei	Methanosarcina mazei	Archaea;Euryarchaeota;Stenosarchaea group	3.F.A.1B.1	SAMN02708983	PRJNA242781	Scaffold	4.07842	41.5		JJPC01	167	3359	2015-04-23T00:00:00Z	ftp://ftp.ncbi.nlm.nih.gov/genomes/all/GCA/000/979/505/GCA_000979505.1_gtlEnvA5udCFS	ftp://ftp.ncbi.nlm.nih.gov/genomes/all/GCF/000/979/505/GCF_000979505.1_gtlEnvA5udCFS
GCA_000979675.1	d__Archaea;p__Halobacteriota;c__Methanosarcinia;o__Methanosarcinales;f__Methanosarcinaceae;g__Methanosarcina;s__Methanosarcina mazei	Methanosarcina mazei	Archaea;Euryarchaeota;Stenosarchaea group	3.H.A.1A.2	SAMN02708962	PRJNA242781	Scaffold	4.09568	41.5		JJPN01	182	3387	2015-04-23T00:00:00Z	ftp://ftp.ncbi.nlm.nih.gov/genomes/all/GCA/000/979/675/GCA_000979675.1_gtlEnvA5udCFS	ftp://ftp.ncbi.nlm.nih.gov/genomes/all/GCF/000/979/675/GCF_000979675.1_gtlEnvA5udCFS
GCA_000979555.1	d__Archaea;p__Halobacteriota;c__Methanosarcinia;o__Methanosarcinales;f__Methanosarcinaceae;g__Methanosarcina;s__Methanosarcina mazei	Methanosarcina mazei	Archaea;Euryarchaeota;Stenosarchaea group	3.F.A.2.3	SAMN02708976	PRJNA242781	Scaffold	4.07893	41.6		JJPE01	185	3361	2015-04-23T00:00:00Z	ftp://ftp.ncbi.nlm.nih.gov/genomes/all/GCA/000/979/555/GCA_000979555.1_gtlEnvA5udCFS	ftp://ftp.ncbi.nlm.nih.gov/genomes/all/GCF/000/979/555/GCF_000979555.1_gtlEnvA5udCFS
GCA_000979895.1	d__Archaea;p__Halobacteriota;c__Methanosarcinia;o__Methanosarcinales;f__Methanosarcinaceae;g__Methanosarcina;s__Methanosarcina mazei	Methanosarcina mazei	Archaea;Euryarchaeota;Stenosarchaea group	1.H.A.0.1	SAMN02708934	PRJNA242781	Scaffold	3.96825	41.7		JJQF01	157	3281	2015-04-23T00:00:00Z	ftp://ftp.ncbi.nlm.nih.gov/genomes/all/GCA/000/979/895/GCA_000979895.1_gtlEnvA5udCFS	ftp://ftp.ncbi.nlm.nih.gov/genomes/all/GCF/000/979/895/GCF_000979895.1_gtlEnvA5udCFS
GCA_000979335.1	d__Archaea;p__Halobacteriota;c__Methanosarcinia;o__Methanosarcinales;f__Methanosarcinaceae;g__Methanosarcina;s__Methanosarcina mazei	Methanosarcina mazei	Archaea;Euryarchaeota;Stenosarchaea group	2.F.A.2.3	SAMN02708960	PRJNA242781	Scaffold	4.07794	41.6		JJOR01	189	3370	2015-04-23T00:00:00Z	ftp://ftp.ncbi.nlm.nih.gov/genomes/all/GCA/000/979/335/GCA_000979335.1_gtlEnvA5udCFS	ftp://ftp.ncbi.nlm.nih.gov/genomes/all/GCF/000/979/335/GCF_000979335.1_gtlEnvA5udCFS
GCA_000979665.1	d__Archaea;p__Halobacteriota;c__Methanosarcinia;o__Methanosarcinales;f__Methanosarcinaceae;g__Methanosarcina;s__Methanosarcina mazei	Methanosarcina mazei	Archaea;Euryarchaeota;Stenosarchaea group	3.F.T.2.1	SAMN02708986	PRJNA242781	Scaffold	4.11022	41.5		JJPL01	162	3384	2015-04-23T00:00:00Z	ftp://ftp.ncbi.nlm.nih.gov/genomes/all/GCA/000/979/665/GCA_000979665.1_gtlEnvA5udCFS	ftp://ftp.ncbi.nlm.nih.gov/genomes/all/GCF/000/979/665/GCF_000979665.1_gtlEnvA5udCFS
GCA_000979275.1	d__Archaea;p__Halobacteriota;c__Methanosarcinia;o__Methanosarcinales;f__Methanosarcinaceae;g__Methanosarcina;s__Methanosarcina mazei	Methanosarcina mazei	Archaea;Euryarchaeota;Stenosarchaea group	1.H.M.2.2	SAMN02708939	PRJNA242781	Scaffold	4.0826	41.6		JJQV01	154	3370	2015-04-23T00:00:00Z	ftp://ftp.ncbi.nlm.nih.gov/genomes/all/GCA/000/979/275/GCA_000979275.1_gtlEnvA5udCFS	ftp://ftp.ncbi.nlm.nih.gov/genomes/all/GCF/000/979/275/GCF_000979275.1_gtlEnvA5udCFS
GCA_000980135.1	d__Archaea;p__Halobacteriota;c__Methanosarcinia;o__Methanosarcinales;f__Methanosarcinaceae;g__Methanosarcina;s__Methanosarcina mazei	Methanosarcina mazei	Archaea;Euryarchaeota;Stenosarchaea group	1.H.T.2.1	SAMN02708973	PRJNA242781	Scaffold	4.07757	41.6		JJQZ01	159	3363	2015-04-23T00:00:00Z	ftp://ftp.ncbi.nlm.nih.gov/genomes/all/GCA/000/980/135/GCA_000980135.1_gtlEnvA5udCFS	ftp://ftp.ncbi.nlm.nih.gov/genomes/all/GCF/000/980/135/GCF_000980135.1_gtlEnvA5udCFS
GCA_000979205.1	d__Archaea;p__Halobacteriota;c__Methanosarcinia;o__Methanosarcinales;f__Methanosarcinaceae;g__Methanosarcina;s__Methanosarcina mazei	Methanosarcina mazei	Archaea;Euryarchaeota;Stenosarchaea group	1.H.A.2.7	SAMN02708937	PRJNA242781	Scaffold	4.2341	41.4		JJQO01	374	3596	2015-04-23T00:00:00Z	ftp://ftp.ncbi.nlm.nih.gov/genomes/all/GCA/000/979/205/GCA_000979205.1_gtlEnvA5udCFS	ftp://ftp.ncbi.nlm.nih.gov/genomes/all/GCF/000/979/205/GCF_000979205.1_gtlEnvA5udCFS
GCA_000980025.1	d__Archaea;p__Halobacteriota;c__Methanosarcinia;o__Methanosarcinales;f__Methanosarcinaceae;g__Methanosarcina;s__Methanosarcina mazei	Methanosarcina mazei	Archaea;Euryarchaeota;Stenosarchaea group	1.H.M.0.1	SAMN02708970	PRJNA242781	Scaffold	4.06409	41.6		JJQQ01	176	3359	2015-04-23T00:00:00Z	ftp://ftp.ncbi.nlm.nih.gov/genomes/all/GCA/000/980/025/GCA_000980025.1_gtlEnvA5udCFS	ftp://ftp.ncbi.nlm.nih.gov/genomes/all/GCF/000/980/025/GCF_000980025.1_gtlEnvA5udCFS
GCA_000980075.1	d__Archaea;p__Halobacteriota;c__Methanosarcinia;o__Methanosarcinales;f__Methanosarcinaceae;g__Methanosarcina;s__Methanosarcina mazei	Methanosarcina mazei	Archaea;Euryarchaeota;Stenosarchaea group	1.H.M.2.3	SAMN02708940	PRJNA242781	Scaffold	3.9788	41.6		JJQW01	142	3291	2015-04-23T00:00:00Z	ftp://ftp.ncbi.nlm.nih.gov/genomes/all/GCA/000/980/075/GCA_000980075.1_gtlEnvA5udCFS	ftp://ftp.ncbi.nlm.nih.gov/genomes/all/GCF/000/980/075/GCF_000980075.1_gtlEnvA5udCFS
GCA_000979825.1	d__Archaea;p__Halobacteriota;c__Methanosarcinia;o__Methanosarcinales;f__Methanosarcinaceae;g__Methanosarcina;s__Methanosarcina mazei	Methanosarcina mazei	Archaea;Euryarchaeota;Stenosarchaea group	3.H.T.1A.2	SAMN02708965	PRJNA242781	Scaffold	4.09127	41.5		JJPZ01	185	3391	2015-04-23T00:00:00Z	ftp://ftp.ncbi.nlm.nih.gov/genomes/all/GCA/000/979/825/GCA_000979825.1_gtlEnvA5udCFS	ftp://ftp.ncbi.nlm.nih.gov/genomes/all/GCF/000/979/825/GCF_000979825.1_gtlEnvA5udCFS
GCA_000979915.1	d__Archaea;p__Halobacteriota;c__Methanosarcinia;o__Methanosarcinales;f__Methanosarcinaceae;g__Methanosarcina;s__Methanosarcina mazei	Methanosarcina mazei	Archaea;Euryarchaeota;Stenosarchaea group	1.H.A.1A.1	SAMN02708957	PRJNA242781	Scaffold	4.0449	41.6		JJQG01	172	3339	2015-04-23T00:00:00Z	ftp://ftp.ncbi.nlm.nih.gov/genomes/all/GCA/000/979/915/GCA_000979915.1_gtlEnvA5udCFS	ftp://ftp.ncbi.nlm.nih.gov/genomes/all/GCF/000/979/915/GCF_000979915.1_gtlEnvA5udCFS
GCA_000979755.1	d__Archaea;p__Halobacteriota;c__Methanosarcinia;o__Methanosarcinales;f__Methanosarcinaceae;g__Methanosarcina;s__Methanosarcina mazei	Methanosarcina mazei	Archaea;Euryarchaeota;Stenosarchaea group	3.H.M.1A.1	SAMN02708952	PRJNA242781	Scaffold	4.1215	41.4		JJPT01	167	3369	2015-04-23T00:00:00Z	ftp://ftp.ncbi.nlm.nih.gov/genomes/all/GCA/000/979/755/GCA_000979755.1_gtlEnvA5udCFS	ftp://ftp.ncbi.nlm.nih.gov/genomes/all/GCF/000/979/755/GCF_000979755.1_gtlEnvA5udCFS
GCA_000979025.1	d__Archaea;p__Halobacteriota;c__Methanosarcinia;o__Methanosarcinales;f__Methanosarcinaceae;g__Methanosarcina;s__Methanosarcina mazei	Methanosarcina mazei	Archaea;Euryarchaeota;Stenosarchaea group	3.H.A.2.6	SAMN02708951	PRJNA242781	Scaffold	4.01438	41.7		JJPR01	167	3304	2015-04-23T00:00:00Z	ftp://ftp.ncbi.nlm.nih.gov/genomes/all/GCA/000/979/025/GCA_000979025.1_gtlEnvA5udCFS	ftp://ftp.ncbi.nlm.nih.gov/genomes/all/GCF/000/979/025/GCF_000979025.1_gtlEnvA5udCFS
GCA_000978945.1	d__Archaea;p__Halobacteriota;c__Methanosarcinia;o__Methanosarcinales;f__Methanosarcinaceae;g__Methanosarcina;s__Methanosarcina mazei	Methanosarcina mazei	Archaea;Euryarchaeota;Stenosarchaea group	3.F.A.1A.3	SAMN02708944	PRJNA242781	Scaffold	4.07397	41.6		JJPB01	147	3364	2015-04-23T00:00:00Z	ftp://ftp.ncbi.nlm.nih.gov/genomes/all/GCA/000/978/945/GCA_000978945.1_gtlEnvA5udCFS	ftp://ftp.ncbi.nlm.nih.gov/genomes/all/GCF/000/978/945/GCF_000978945.1_gtlEnvA5udCFS
GCA_000979175.1	d__Archaea;p__Halobacteriota;c__Methanosarcinia;o__Methanosarcinales;f__Methanosarcinaceae;g__Methanosarcina;s__Methanosarcina mazei	Methanosarcina mazei	Archaea;Euryarchaeota;Stenosarchaea group	1.H.A.1A.3	SAMN02708968	PRJNA242781	Scaffold	4.08497	41.6		JJQH01	205	3368	2015-04-23T00:00:00Z	ftp://ftp.ncbi.nlm.nih.gov/genomes/all/GCA/000/979/175/GCA_000979175.1_gtlEnvA5udCFS	ftp://ftp.ncbi.nlm.nih.gov/genomes/all/GCF/000/979/175/GCF_000979175.1_gtlEnvA5udCFS
GCA_000979575.1	d__Archaea;p__Halobacteriota;c__Methanosarcinia;o__Methanosarcinales;f__Methanosarcinaceae;g__Methanosarcina;s__Methanosarcina mazei	Methanosarcina mazei	Archaea;Euryarchaeota;Stenosarchaea group	3.F.A.2.6	SAMN02708946	PRJNA242781	Scaffold	4.04321	41.6		JJPG01	160	3341	2015-04-23T00:00:00Z	ftp://ftp.ncbi.nlm.nih.gov/genomes/all/GCA/000/979/575/GCA_000979575.1_gtlEnvA5udCFS	ftp://ftp.ncbi.nlm.nih.gov/genomes/all/GCF/000/979/575/GCF_000979575.1_gtlEnvA5udCFS
GCA_000979015.1	d__Archaea;p__Halobacteriota;c__Methanosarcinia;o__Methanosarcinales;f__Methanosarcinaceae;g__Methanosarcina;s__Methanosarcina mazei	Methanosarcina mazei	Archaea;Euryarchaeota;Stenosarchaea group	3.H.A.2.1	SAMN02708987	PRJNA242781	Scaffold	3.982	41.6		JJPO01	159	3319	2015-04-23T00:00:00Z	ftp://ftp.ncbi.nlm.nih.gov/genomes/all/GCA/000/979/015/GCA_000979015.1_gtlEnvA5udCFS	ftp://ftp.ncbi.nlm.nih.gov/genomes/all/GCF/000/979/015/GCF_000979015.1_gtlEnvA5udCFS
GCA_000979515.1	d__Archaea;p__Halobacteriota;c__Methanosarcinia;o__Methanosarcinales;f__Methanosarcinaceae;g__Methanosarcina;s__Methanosarcina mazei	Methanosarcina mazei	Archaea;Euryarchaeota;Stenosarchaea group	3.F.A.2.12	SAMN02708975	PRJNA242781	Scaffold	4.07611	41.6		JJPD01	209	3370	2015-04-23T00:00:00Z	ftp://ftp.ncbi.nlm.nih.gov/genomes/all/GCA/000/979/515/GCA_000979515.1_gtlEnvA5udCFS	ftp://ftp.ncbi.nlm.nih.gov/genomes/all/GCF/000/979/515/GCF_000979515.1_gtlEnvA5udCFS
GCA_000979925.1	d__Archaea;p__Halobacteriota;c__Methanosarcinia;o__Methanosarcinales;f__Methanosarcinaceae;g__Methanosarcina;s__Methanosarcina mazei	Methanosarcina mazei	Archaea;Euryarchaeota;Stenosarchaea group	1.H.A.1A.6	SAMN02708969	PRJNA242781	Scaffold	4.07965	41.6		JJQJ01	231	3356	2015-04-23T00:00:00Z	ftp://ftp.ncbi.nlm.nih.gov/genomes/all/GCA/000/979/925/GCA_000979925.1_gtlEnvA5udCFS	ftp://ftp.ncbi.nlm.nih.gov/genomes/all/GCF/000/979/925/GCF_000979925.1_gtlEnvA5udCFS
GCA_000979095.1	d__Archaea;p__Halobacteriota;c__Methanosarcinia;o__Methanosarcinales;f__Methanosarcinaceae;g__Methanosarcina;s__Methanosarcina mazei	Methanosarcina mazei	Archaea;Euryarchaeota;Stenosarchaea group	3.H.M.2.7	SAMN02708964	PRJNA242781	Scaffold	4.00362	41.7		JJPX01	199	3301	2015-04-23T00:00:00Z	ftp://ftp.ncbi.nlm.nih.gov/genomes/all/GCA/000/979/095/GCA_000979095.1_gtlEnvA5udCFS	ftp://ftp.ncbi.nlm.nih.gov/genomes/all/GCF/000/979/095/GCF_000979095.1_gtlEnvA5udCFS
GCA_000979995.1	d__Archaea;p__Halobacteriota;c__Methanosarcinia;o__Methanosarcinales;f__Methanosarcinaceae;g__Methanosarcina;s__Methanosarcina mazei	Methanosarcina mazei	Archaea;Euryarchaeota;Stenosarchaea group	1.H.A.2.6	SAMN02708979	PRJNA242781	Scaffold	4.00686	41.6		JJQN01	204	3336	2015-04-23T00:00:00Z	ftp://ftp.ncbi.nlm.nih.gov/genomes/all/GCA/000/979/995/GCA_000979995.1_gtlEnvA5udCFS	ftp://ftp.ncbi.nlm.nih.gov/genomes/all/GCF/000/979/995/GCF_000979995.1_gtlEnvA5udCFS
GCA_000979035.1	d__Archaea;p__Halobacteriota;c__Methanosarcinia;o__Methanosarcinales;f__Methanosarcinaceae;g__Methanosarcina;s__Methanosarcina mazei	Methanosarcina mazei	Archaea;Euryarchaeota;Stenosarchaea group	3.H.M.1B.1	SAMN02708985	PRJNA242781	Scaffold	4.12969	41.5		JJPU01	211	3408	2015-04-23T00:00:00Z	ftp://ftp.ncbi.nlm.nih.gov/genomes/all/GCA/000/979/035/GCA_000979035.1_gtlEnvA5udCFS	ftp://ftp.ncbi.nlm.nih.gov/genomes/all/GCF/000/979/035/GCF_000979035.1_gtlEnvA5udCFS
GCA_000979735.1	d__Archaea;p__Halobacteriota;c__Methanosarcinia;o__Methanosarcinales;f__Methanosarcinaceae;g__Methanosarcina;s__Methanosarcina mazei	Methanosarcina mazei	Archaea;Euryarchaeota;Stenosarchaea group	3.H.A.2.5	SAMN02708950	PRJNA242781	Scaffold	4.09415	41.6		JJPQ01	186	3376	2015-04-23T00:00:00Z	ftp://ftp.ncbi.nlm.nih.gov/genomes/all/GCA/000/979/735/GCA_000979735.1_gtlEnvA5udCFS	ftp://ftp.ncbi.nlm.nih.gov/genomes/all/GCF/000/979/735/GCF_000979735.1_gtlEnvA5udCFS
GCA_000979745.1	d__Archaea;p__Halobacteriota;c__Methanosarcinia;o__Methanosarcinales;f__Methanosarcinaceae;g__Methanosarcina;s__Methanosarcina mazei	Methanosarcina mazei	Archaea;Euryarchaeota;Stenosarchaea group	3.H.A.2.8	SAMN02708977	PRJNA242781	Scaffold	4.00594	41.7		JJPS01	222	3275	2015-04-23T00:00:00Z	ftp://ftp.ncbi.nlm.nih.gov/genomes/all/GCA/000/979/745/GCA_000979745.1_gtlEnvA5udCFS	ftp://ftp.ncbi.nlm.nih.gov/genomes/all/GCF/000/979/745/GCF_000979745.1_gtlEnvA5udCFS
GCA_000978955.1	d__Archaea;p__Halobacteriota;c__Methanosarcinia;o__Methanosarcinales;f__Methanosarcinaceae;g__Methanosarcina;s__Methanosarcina mazei	Methanosarcina mazei	Archaea;Euryarchaeota;Stenosarchaea group	2.F.T.2.6	SAMN02708974	PRJNA242781	Scaffold	4.06196	41.6		JJOU01	236	3357	2015-04-23T00:00:00Z	ftp://ftp.ncbi.nlm.nih.gov/genomes/all/GCA/000/978/955/GCA_000978955.1_gtlEnvA5udCFS	ftp://ftp.ncbi.nlm.nih.gov/genomes/all/GCF/000/978/955/GCF_000978955.1_gtlEnvA5udCFS
GCA_000979495.1	d__Archaea;p__Halobacteriota;c__Methanosarcinia;o__Methanosarcinales;f__Methanosarcinaceae;g__Methanosarcina;s__Methanosarcina mazei	Methanosarcina mazei	Archaea;Euryarchaeota;Stenosarchaea group	3.F.A.1A.1	SAMN02708982	PRJNA242781	Scaffold	4.10248	41.7		JJPA01	267	3479	2015-04-23T00:00:00Z	ftp://ftp.ncbi.nlm.nih.gov/genomes/all/GCA/000/979/495/GCA_000979495.1_gtlEnvA5udCFS	ftp://ftp.ncbi.nlm.nih.gov/genomes/all/GCF/000/979/495/GCF_000979495.1_gtlEnvA5udCFS
GCA_000979115.1	d__Archaea;p__Halobacteriota;c__Methanosarcinia;o__Methanosarcinales;f__Methanosarcinaceae;g__Methanosarcina;s__Methanosarcina mazei	Methanosarcina mazei	Archaea;Euryarchaeota;Stenosarchaea group	1.F.A.2.8	SAMN02708956	PRJNA242781	Scaffold	3.9718	41.7		JJQD01	238	3300	2015-04-23T00:00:00Z	ftp://ftp.ncbi.nlm.nih.gov/genomes/all/GCA/000/979/115/GCA_000979115.1_gtlEnvA5udCFS	ftp://ftp.ncbi.nlm.nih.gov/genomes/all/GCF/000/979/115/GCF_000979115.1_gtlEnvA5udCFS
GCA_000980105.1	d__Archaea;p__Halobacteriota;c__Methanosarcinia;o__Methanosarcinales;f__Methanosarcinaceae;g__Methanosarcina;s__Methanosarcina mazei	Methanosarcina mazei	Archaea;Euryarchaeota;Stenosarchaea group	1.H.M.2.4	SAMN02708972	PRJNA242781	Scaffold	4.0792	41.6		JJQX01	260	3384	2015-04-23T00:00:00Z	ftp://ftp.ncbi.nlm.nih.gov/genomes/all/GCA/000/980/105/GCA_000980105.1_gtlEnvA5udCFS	ftp://ftp.ncbi.nlm.nih.gov/genomes/all/GCF/000/980/105/GCF_000980105.1_gtlEnvA5udCFS
GCA_000980085.1	d__Archaea;p__Halobacteriota;c__Methanosarcinia;o__Methanosarcinales;f__Methanosarcinaceae;g__Methanosarcina;s__Methanosarcina mazei	Methanosarcina mazei	Archaea;Euryarchaeota;Stenosarchaea group	1.H.M.1A.3	SAMN02708971	PRJNA242781	Scaffold	4.08166	41.6		JJQT01	257	3402	2015-04-23T00:00:00Z	ftp://ftp.ncbi.nlm.nih.gov/genomes/all/GCA/000/980/085/GCA_000980085.1_gtlEnvA5udCFS	ftp://ftp.ncbi.nlm.nih.gov/genomes/all/GCF/000/980/085/GCF_000980085.1_gtlEnvA5udCFS
GCA_000979265.1	d__Archaea;p__Halobacteriota;c__Methanosarcinia;o__Methanosarcinales;f__Methanosarcinaceae;g__Methanosarcina;s__Methanosarcina mazei	Methanosarcina mazei	Archaea;Euryarchaeota;Stenosarchaea group	1.H.M.2.1	SAMN02708980	PRJNA242781	Scaffold	4.18856	41.6		JJQU01	263	3489	2015-04-23T00:00:00Z	ftp://ftp.ncbi.nlm.nih.gov/genomes/all/GCA/000/979/265/GCA_000979265.1_gtlEnvA5udCFS	ftp://ftp.ncbi.nlm.nih.gov/genomes/all/GCF/000/979/265/GCF_000979265.1_gtlEnvA5udCFS
GCA_000979935.1	d__Archaea;p__Halobacteriota;c__Methanosarcinia;o__Methanosarcinales;f__Methanosarcinaceae;g__Methanosarcina;s__Methanosarcina mazei	Methanosarcina mazei	Archaea;Euryarchaeota;Stenosarchaea group	1.H.A.2.1	SAMN02708978	PRJNA242781	Scaffold	3.99833	41.7		JJQK01	294	3326	2015-04-23T00:00:00Z	ftp://ftp.ncbi.nlm.nih.gov/genomes/all/GCA/000/979/935/GCA_000979935.1_gtlEnvA5udCFS	ftp://ftp.ncbi.nlm.nih.gov/genomes/all/GCF/000/979/935/GCF_000979935.1_gtlEnvA5udCFS
GCA_000980005.1	d__Archaea;p__Halobacteriota;c__Methanosarcinia;o__Methanosarcinales;f__Methanosarcinaceae;g__Methanosarcina;s__Methanosarcina mazei	Methanosarcina mazei	Archaea;Euryarchaeota;Stenosarchaea group	1.H.A.2.8	SAMN02708958	PRJNA242781	Scaffold	4.07752	41.7		JJQP01	337	3389	2015-04-23T00:00:00Z	ftp://ftp.ncbi.nlm.nih.gov/genomes/all/GCA/000/980/005/GCA_000980005.1_gtlEnvA5udCFS	ftp://ftp.ncbi.nlm.nih.gov/genomes/all/GCF/000/980/005/GCF_000980005.1_gtlEnvA5udCFS
GCA_000979655.1	d__Archaea;p__Halobacteriota;c__Methanosarcinia;o__Methanosarcinales;f__Methanosarcinaceae;g__Methanosarcina;s__Methanosarcina mazei	Methanosarcina mazei	Archaea;Euryarchaeota;Stenosarchaea group	3.H.A.1A.1	SAMN02708984	PRJNA242781	Scaffold	4.01107	41.6		JJPM01	349	3359	2015-04-23T00:00:00Z	ftp://ftp.ncbi.nlm.nih.gov/genomes/all/GCA/000/979/655/GCA_000979655.1_gtlEnvA5udCFS	ftp://ftp.ncbi.nlm.nih.gov/genomes/all/GCF/000/979/655/GCF_000979655.1_gtlEnvA5udCFS
GCA_002506415.1	d__Archaea;p__Halobacteriota;c__Methanosarcinia;o__Methanosarcinales;f__Methanosarcinaceae;g__Methanosarcina;s__Methanosarcina mazei	Methanosarcina mazei	Archaea;Euryarchaeota;Stenosarchaea group	UBA432	SAMN06027564	PRJNA348753	Scaffold	3.83968	41.7		DAXN01	130	0	2017-10-10T00:00:00Z	ftp://ftp.ncbi.nlm.nih.gov/genomes/all/GCA/002/506/415/GCA_002506415.1_ASM250641v1
GCA_002507065.1	d__Archaea;p__Halobacteriota;c__Methanosarcinia;o__Methanosarcinales;f__Methanosarcinaceae;g__Methanosarcina;s__Methanosarcina mazei	Methanosarcina mazei	Archaea;Euryarchaeota;Stenosarchaea group	UBA454	SAMN06027332	PRJNA348753	Scaffold	3.6807	41.7		DAYZ01	160	0	2017-10-10T00:00:00Z	ftp://ftp.ncbi.nlm.nih.gov/genomes/all/GCA/002/507/065/GCA_002507065.1_ASM250706v1
GCA_002496095.1	d__Archaea;p__Halobacteriota;c__Methanosarcinia;o__Methanosarcinales;f__Methanosarcinaceae;g__Methanosarcina;s__Methanosarcina mazei	Methanosarcina mazei	Archaea;Euryarchaeota;Stenosarchaea group	UBA457	SAMN06027329	PRJNA348753	Scaffold	3.31818	41.5		DAIL01	185	0	2017-10-10T00:00:00Z	ftp://ftp.ncbi.nlm.nih.gov/genomes/all/GCA/002/496/095/GCA_002496095.1_ASM249609v1
GCA_004294765.1	d__Archaea;p__Halobacteriota;c__Methanosarcinia;o__Methanosarcinales;f__Methanosarcinaceae;g__Methanosarcina;s__Methanosarcina mazei	Methanosarcina mazei	Archaea;Euryarchaeota;Stenosarchaea group	MAG16	SAMN10868518	PRJNA520828	Scaffold	2.78236	42.8		SHOM01	984	2645	2019-02-24T00:00:00Z	ftp://ftp.ncbi.nlm.nih.gov/genomes/all/GCA/004/294/765/GCA_004294765.1_ASM429476v1
GCA_000970145.1	d__Archaea;p__Halobacteriota;c__Methanosarcinia;o__Methanosarcinales;f__Methanosarcinaceae;g__Methanosarcina;s__Methanosarcina siciliae	Methanosarcina siciliae C2J	Archaea;Euryarchaeota;Stenosarchaea group	C2J	SAMN03074587	PRJNA230951	Complete	5.42789	42.6	chromosome:NZ_CP009508.1/CP009508.1		1	4384	2015-04-07T00:00:00Z	ftp://ftp.ncbi.nlm.nih.gov/genomes/all/GCA/000/970/145/GCA_000970145.1_ASM97014v1	ftp://ftp.ncbi.nlm.nih.gov/genomes/all/GCF/000/970/145/GCF_000970145.1_ASM97014v1
GCA_000970125.1	d__Archaea;p__Halobacteriota;c__Methanosarcinia;o__Methanosarcinales;f__Methanosarcinaceae;g__Methanosarcina;s__Methanosarcina siciliae	Methanosarcina siciliae HI350	Archaea;Euryarchaeota;Stenosarchaea group	HI350	SAMN03074588	PRJNA230952	Complete	4.94111	43.1	chromosome:NZ_CP009507.1/CP009507.1		1	3845	2015-04-07T00:00:00Z	ftp://ftp.ncbi.nlm.nih.gov/genomes/all/GCA/000/970/125/GCA_000970125.1_ASM97012v1	ftp://ftp.ncbi.nlm.nih.gov/genomes/all/GCF/000/970/125/GCF_000970125.1_ASM97012v1
GCA_000969965.1	d__Archaea;p__Halobacteriota;c__Methanosarcinia;o__Methanosarcinales;f__Methanosarcinaceae;g__Methanosarcina;s__Methanosarcina sp000969965	Methanosarcina sp. WWM596	Archaea;Euryarchaeota;Stenosarchaea group	WWM596	SAMN03074594	PRJNA230958	Complete	4.13734	41.7	chromosome:NZ_CP009503.1/CP009503.1		1	3458	2015-04-07T00:00:00Z	ftp://ftp.ncbi.nlm.nih.gov/genomes/all/GCA/000/969/965/GCA_000969965.1_ASM96996v1	ftp://ftp.ncbi.nlm.nih.gov/genomes/all/GCF/000/969/965/GCF_000969965.1_ASM96996v1
GCA_000970005.1	d__Archaea;p__Halobacteriota;c__Methanosarcinia;o__Methanosarcinales;f__Methanosarcinaceae;g__Methanosarcina;s__Methanosarcina sp000969965	Methanosarcina sp. WH1	Archaea;Euryarchaeota;Stenosarchaea group	WH1	SAMN03074593	PRJNA230957	Complete	3.91409	41.8	chromosome:NZ_CP009504.1/CP009504.1		1	3241	2015-04-07T00:00:00Z	ftp://ftp.ncbi.nlm.nih.gov/genomes/all/GCA/000/970/005/GCA_000970005.1_ASM97000v1	ftp://ftp.ncbi.nlm.nih.gov/genomes/all/GCF/000/970/005/GCF_000970005.1_ASM97000v1
GCA_000979455.1	d__Archaea;p__Halobacteriota;c__Methanosarcinia;o__Methanosarcinales;f__Methanosarcinaceae;g__Methanosarcina;s__Methanosarcina sp000979455	Methanosarcina sp. 2.H.T.1A.6	Archaea;Euryarchaeota;Stenosarchaea group	2.H.T.1A.6	SAMN02708991	PRJNA242781	Scaffold	4.07463	42.8		JJOY01	54	3340	2015-04-23T00:00:00Z	ftp://ftp.ncbi.nlm.nih.gov/genomes/all/GCA/000/979/455/GCA_000979455.1_gtlEnvA5udCFS	ftp://ftp.ncbi.nlm.nih.gov/genomes/all/GCF/000/979/455/GCF_000979455.1_gtlEnvA5udCFS
GCA_000979475.1	d__Archaea;p__Halobacteriota;c__Methanosarcinia;o__Methanosarcinales;f__Methanosarcinaceae;g__Methanosarcina;s__Methanosarcina sp000979455	Methanosarcina sp. 2.H.T.1A.8	Archaea;Euryarchaeota;Stenosarchaea group	2.H.T.1A.8	SAMN02708990	PRJNA242781	Scaffold	4.0699	42.8		JJOZ01	69	3343	2015-04-23T00:00:00Z	ftp://ftp.ncbi.nlm.nih.gov/genomes/all/GCA/000/979/475/GCA_000979475.1_gtlEnvA5udCFS	ftp://ftp.ncbi.nlm.nih.gov/genomes/all/GCF/000/979/475/GCF_000979475.1_gtlEnvA5udCFS
GCA_000979425.1	d__Archaea;p__Halobacteriota;c__Methanosarcinia;o__Methanosarcinales;f__Methanosarcinaceae;g__Methanosarcina;s__Methanosarcina sp000979455	Methanosarcina sp. 2.H.T.1A.3	Archaea;Euryarchaeota;Stenosarchaea group	2.H.T.1A.3	SAMN02708989	PRJNA242781	Scaffold	4.08361	42.8		JJOX01	92	3362	2015-04-23T00:00:00Z	ftp://ftp.ncbi.nlm.nih.gov/genomes/all/GCA/000/979/425/GCA_000979425.1_gtlEnvA5udCFS	ftp://ftp.ncbi.nlm.nih.gov/genomes/all/GCF/000/979/425/GCF_000979425.1_gtlEnvA5udCFS
GCA_000979385.1	d__Archaea;p__Halobacteriota;c__Methanosarcinia;o__Methanosarcinales;f__Methanosarcinaceae;g__Methanosarcina;s__Methanosarcina sp000979455	Methanosarcina sp. 2.H.A.1B.4	Archaea;Euryarchaeota;Stenosarchaea group	2.H.A.1B.4	SAMN02708992	PRJNA242781	Scaffold	3.90715	42.9		JJOV01	94	3199	2015-04-23T00:00:00Z	ftp://ftp.ncbi.nlm.nih.gov/genomes/all/GCA/000/979/385/GCA_000979385.1_gtlEnvA5udCFS	ftp://ftp.ncbi.nlm.nih.gov/genomes/all/GCF/000/979/385/GCF_000979385.1_gtlEnvA5udCFS
GCA_000979975.1	d__Archaea;p__Halobacteriota;c__Methanosarcinia;o__Methanosarcinales;f__Methanosarcinaceae;g__Methanosarcina;s__Methanosarcina sp000979455	Methanosarcina sp. 1.H.A.2.2	Archaea;Euryarchaeota;Stenosarchaea group	1.H.A.2.2	SAMN02708993	PRJNA242781	Scaffold	3.87073	43.1		JJQL01	103	3160	2015-04-23T00:00:00Z	ftp://ftp.ncbi.nlm.nih.gov/genomes/all/GCA/000/979/975/GCA_000979975.1_gtlEnvA5udCFS	ftp://ftp.ncbi.nlm.nih.gov/genomes/all/GCF/000/979/975/GCF_000979975.1_gtlEnvA5udCFS
GCA_000979295.1	d__Archaea;p__Halobacteriota;c__Methanosarcinia;o__Methanosarcinales;f__Methanosarcinaceae;g__Methanosarcina;s__Methanosarcina sp000979455	Methanosarcina sp. 1.H.T.1A.1	Archaea;Euryarchaeota;Stenosarchaea group	1.H.T.1A.1	SAMN02708994	PRJNA242781	Scaffold	3.84214	43.1		JJQY01	160	3140	2015-04-23T00:00:00Z	ftp://ftp.ncbi.nlm.nih.gov/genomes/all/GCA/000/979/295/GCA_000979295.1_gtlEnvA5udCFS	ftp://ftp.ncbi.nlm.nih.gov/genomes/all/GCF/000/979/295/GCF_000979295.1_gtlEnvA5udCFS
GCA_000979415.1	d__Archaea;p__Halobacteriota;c__Methanosarcinia;o__Methanosarcinales;f__Methanosarcinaceae;g__Methanosarcina;s__Methanosarcina sp000979455	Methanosarcina sp. 2.H.T.1A.15	Archaea;Euryarchaeota;Stenosarchaea group	2.H.T.1A.15	SAMN02708988	PRJNA242781	Scaffold	4.08005	42.8		JJOW01	352	3407	2015-04-23T00:00:00Z	ftp://ftp.ncbi.nlm.nih.gov/genomes/all/GCA/000/979/415/GCA_000979415.1_gtlEnvA5udCFS	ftp://ftp.ncbi.nlm.nih.gov/genomes/all/GCF/000/979/415/GCF_000979415.1_gtlEnvA5udCFS
GCA_002496565.1	d__Archaea;p__Halobacteriota;c__Methanosarcinia;o__Methanosarcinales;f__Methanosarcinaceae;g__Methanosarcina;s__Methanosarcina sp002496565	Methanosarcina sp. UBA289	Archaea;Euryarchaeota;Stenosarchaea group	UBA289	SAMN06027062	PRJNA348753	Scaffold	3.64019	40		DAKJ01	31	0	2017-10-10T00:00:00Z	ftp://ftp.ncbi.nlm.nih.gov/genomes/all/GCA/002/496/565/GCA_002496565.1_ASM249656v1
GCA_002495725.1	d__Archaea;p__Halobacteriota;c__Methanosarcinia;o__Methanosarcinales;f__Methanosarcinaceae;g__Methanosarcina;s__Methanosarcina sp002496565	Methanosarcina sp. UBA411	Archaea;Euryarchaeota;Stenosarchaea group	UBA411	SAMN06027374	PRJNA348753	Scaffold	3.69609	39.8		DAGK01	35	0	2017-10-10T00:00:00Z	ftp://ftp.ncbi.nlm.nih.gov/genomes/all/GCA/002/495/725/GCA_002495725.1_ASM249572v1
GCA_002494545.1	d__Archaea;p__Halobacteriota;c__Methanosarcinia;o__Methanosarcinales;f__Methanosarcinaceae;g__Methanosarcina;s__Methanosarcina sp002496565	Methanosarcina sp. UBA363	Archaea;Euryarchaeota;Stenosarchaea group	UBA363	SAMN06027075	PRJNA348753	Scaffold	3.33827	39.2		DABZ01	147	0	2017-10-10T00:00:00Z	ftp://ftp.ncbi.nlm.nih.gov/genomes/all/GCA/002/494/545/GCA_002494545.1_ASM249454v1
GCA_002494845.1	d__Archaea;p__Halobacteriota;c__Methanosarcinia;o__Methanosarcinales;f__Methanosarcinaceae;g__Methanosarcina;s__Methanosarcina sp002499445	Methanosarcina sp. UBA43	Archaea;Euryarchaeota;Stenosarchaea group	UBA43	SAMN06027024	PRJNA348753	Scaffold	3.0465	40.2		DACU01	20	0	2017-10-10T00:00:00Z	ftp://ftp.ncbi.nlm.nih.gov/genomes/all/GCA/002/494/845/GCA_002494845.1_ASM249484v1
GCA_002506095.1	d__Archaea;p__Halobacteriota;c__Methanosarcinia;o__Methanosarcinales;f__Methanosarcinaceae;g__Methanosarcina;s__Methanosarcina sp002499445	Methanosarcina sp. UBA423	Archaea;Euryarchaeota;Stenosarchaea group	UBA423	SAMN06027381	PRJNA348753	Scaffold	2.57832	40.4		DAWW01	29	0	2017-10-10T00:00:00Z	ftp://ftp.ncbi.nlm.nih.gov/genomes/all/GCA/002/506/095/GCA_002506095.1_ASM250609v1
GCA_002506915.1	d__Archaea;p__Halobacteriota;c__Methanosarcinia;o__Methanosarcinales;f__Methanosarcinaceae;g__Methanosarcina;s__Methanosarcina sp002499445	Methanosarcina sp. UBA369	Archaea;Euryarchaeota;Stenosarchaea group	UBA369	SAMN06027071	PRJNA348753	Scaffold	2.98934	40.2		DAYN01	25	0	2017-10-10T00:00:00Z	ftp://ftp.ncbi.nlm.nih.gov/genomes/all/GCA/002/506/915/GCA_002506915.1_ASM250691v1
GCA_002499445.1	d__Archaea;p__Halobacteriota;c__Methanosarcinia;o__Methanosarcinales;f__Methanosarcinaceae;g__Methanosarcina;s__Methanosarcina sp002499445	Methanosarcina sp. UBA293	Archaea;Euryarchaeota;Stenosarchaea group	UBA293	SAMN06027252	PRJNA348753	Scaffold	3.10048	40.3		DALS01	68	0	2017-10-10T00:00:00Z	ftp://ftp.ncbi.nlm.nih.gov/genomes/all/GCA/002/499/445/GCA_002499445.1_ASM249944v1
GCA_002508475.1	d__Archaea;p__Halobacteriota;c__Methanosarcinia;o__Methanosarcinales;f__Methanosarcinaceae;g__Methanosarcina;s__Methanosarcina sp002499445	Methanosarcina sp. UBA392	Archaea;Euryarchaeota;Stenosarchaea group	UBA392	SAMN06027316	PRJNA348753	Scaffold	3.08802	40.2		DAMN01	49	0	2017-10-11T00:00:00Z	ftp://ftp.ncbi.nlm.nih.gov/genomes/all/GCA/002/508/475/GCA_002508475.1_ASM250847v1
GCA_002506455.1	d__Archaea;p__Halobacteriota;c__Methanosarcinia;o__Methanosarcinales;f__Methanosarcinaceae;g__Methanosarcina;s__Methanosarcina sp002499445	Methanosarcina sp. UBA383	Archaea;Euryarchaeota;Stenosarchaea group	UBA383	SAMN06027525	PRJNA348753	Scaffold	3.03258	40.1		DAXP01	64	0	2017-10-10T00:00:00Z	ftp://ftp.ncbi.nlm.nih.gov/genomes/all/GCA/002/506/455/GCA_002506455.1_ASM250645v1
GCA_002506845.1	d__Archaea;p__Halobacteriota;c__Methanosarcinia;o__Methanosarcinales;f__Methanosarcinaceae;g__Methanosarcina;s__Methanosarcina sp002499445	Methanosarcina sp. UBA398	Archaea;Euryarchaeota;Stenosarchaea group	UBA398	SAMN06027312	PRJNA348753	Scaffold	3.1109	40.1		DAYI01	54	0	2017-10-10T00:00:00Z	ftp://ftp.ncbi.nlm.nih.gov/genomes/all/GCA/002/506/845/GCA_002506845.1_ASM250684v1
GCA_002508505.1	d__Archaea;p__Halobacteriota;c__Methanosarcinia;o__Methanosarcinales;f__Methanosarcinaceae;g__Methanosarcina;s__Methanosarcina sp002499445	Methanosarcina sp. UBA304	Archaea;Euryarchaeota;Stenosarchaea group	UBA304	SAMN06027358	PRJNA348753	Scaffold	3.06006	40		DAPH01	62	0	2017-10-11T00:00:00Z	ftp://ftp.ncbi.nlm.nih.gov/genomes/all/GCA/002/508/505/GCA_002508505.1_ASM250850v1
GCA_002495565.1	d__Archaea;p__Halobacteriota;c__Methanosarcinia;o__Methanosarcinales;f__Methanosarcinaceae;g__Methanosarcina;s__Methanosarcina sp002499445	Methanosarcina sp. UBA376	Archaea;Euryarchaeota;Stenosarchaea group	UBA376	SAMN06027553	PRJNA348753	Scaffold	3.10878	39.7		DAGA01	63	0	2017-10-10T00:00:00Z	ftp://ftp.ncbi.nlm.nih.gov/genomes/all/GCA/002/495/565/GCA_002495565.1_ASM249556v1
GCA_002504605.1	d__Archaea;p__Halobacteriota;c__Methanosarcinia;o__Methanosarcinales;f__Methanosarcinaceae;g__Methanosarcina;s__Methanosarcina sp002499445	Methanosarcina sp. UBA301	Archaea;Euryarchaeota;Stenosarchaea group	UBA301	SAMN06027361	PRJNA348753	Scaffold	2.94606	39.8		DATI01	38	0	2017-10-10T00:00:00Z	ftp://ftp.ncbi.nlm.nih.gov/genomes/all/GCA/002/504/605/GCA_002504605.1_ASM250460v1
GCA_002502805.1	d__Archaea;p__Halobacteriota;c__Methanosarcinia;o__Methanosarcinales;f__Methanosarcinaceae;g__Methanosarcina;s__Methanosarcina sp002499445	Methanosarcina sp. UBA323	Archaea;Euryarchaeota;Stenosarchaea group	UBA323	SAMN06027631	PRJNA348753	Scaffold	2.79451	39.6		DAQI01	143	0	2017-10-10T00:00:00Z	ftp://ftp.ncbi.nlm.nih.gov/genomes/all/GCA/002/502/805/GCA_002502805.1_ASM250280v1
GCA_002505825.1	d__Archaea;p__Halobacteriota;c__Methanosarcinia;o__Methanosarcinales;f__Methanosarcinaceae;g__Methanosarcina;s__Methanosarcina sp002499445	Methanosarcina sp. UBA338	Archaea;Euryarchaeota;Stenosarchaea group	UBA338	SAMN06027311	PRJNA348753	Scaffold	1.6423	40.4		DAWA01	109	0	2017-10-10T00:00:00Z	ftp://ftp.ncbi.nlm.nih.gov/genomes/all/GCA/002/505/825/GCA_002505825.1_ASM250582v1
GCA_002503455.1	d__Archaea;p__Halobacteriota;c__Methanosarcinia;o__Methanosarcinales;f__Methanosarcinaceae;g__Methanosarcina;s__Methanosarcina sp002499445	Methanosarcina sp. UBA591	Archaea;Euryarchaeota;Stenosarchaea group	UBA591	SAMN06027514	PRJNA348753	Scaffold	2.97399	39.8		DARU01	177	0	2017-10-10T00:00:00Z	ftp://ftp.ncbi.nlm.nih.gov/genomes/all/GCA/002/503/455/GCA_002503455.1_ASM250345v1
GCA_002509335.1	d__Archaea;p__Halobacteriota;c__Methanosarcinia;o__Methanosarcinales;f__Methanosarcinaceae;g__Methanosarcina;s__Methanosarcina sp002499445	Methanosarcina sp. UBA342	Archaea;Euryarchaeota;Stenosarchaea group	UBA342	SAMN06027438	PRJNA348753	Scaffold	3.04429	39.3		DAIV01	107	0	2017-10-11T00:00:00Z	ftp://ftp.ncbi.nlm.nih.gov/genomes/all/GCA/002/509/335/GCA_002509335.1_ASM250933v1
GCA_002501645.1	d__Archaea;p__Halobacteriota;c__Methanosarcinia;o__Methanosarcinales;f__Methanosarcinaceae;g__Methanosarcina;s__Methanosarcina sp002499445	Methanosarcina sp. UBA361	Archaea;Euryarchaeota;Stenosarchaea group	UBA361	SAMN06027073	PRJNA348753	Scaffold	2.53027	39.6		DANU01	172	0	2017-10-10T00:00:00Z	ftp://ftp.ncbi.nlm.nih.gov/genomes/all/GCA/002/501/645/GCA_002501645.1_ASM250164v1
GCA_002505485.1	d__Archaea;p__Halobacteriota;c__Methanosarcinia;o__Methanosarcinales;f__Methanosarcinaceae;g__Methanosarcina;s__Methanosarcina sp002505485	Methanosarcina sp. UBA5	Archaea;Euryarchaeota;Stenosarchaea group	UBA5	SAMN06027134	PRJNA348753	Scaffold	3.81606	40.1		DAVG01	137	0	2017-10-10T00:00:00Z	ftp://ftp.ncbi.nlm.nih.gov/genomes/all/GCA/002/505/485/GCA_002505485.1_ASM250548v1
GCA_002509325.1	d__Archaea;p__Halobacteriota;c__Methanosarcinia;o__Methanosarcinales;f__Methanosarcinaceae;g__Methanosarcina;s__Methanosarcina sp002509325	Methanosarcina sp. UBA402	Archaea;Euryarchaeota;Stenosarchaea group	UBA402	SAMN06027093	PRJNA348753	Scaffold	2.92067	40.3		DADO01	245	0	2017-10-11T00:00:00Z	ftp://ftp.ncbi.nlm.nih.gov/genomes/all/GCA/002/509/325/GCA_002509325.1_ASM250932v1
GCA_003157235.1	d__Archaea;p__Halobacteriota;c__Methanosarcinia;o__Methanosarcinales;f__Methanosarcinaceae;g__Methanosarcina;s__Methanosarcina sp003157235	Methanosarcina sp.	Archaea;Euryarchaeota;Stenosarchaea group	fen_51	SAMN08179589	PRJNA386568	Scaffold	2.91541	35.7		PMJC01	486	0	2018-05-24T00:00:00Z	ftp://ftp.ncbi.nlm.nih.gov/genomes/all/GCA/003/157/235/GCA_003157235.1_20120600_E3D
GCA_003164755.1	d__Archaea;p__Halobacteriota;c__Methanosarcinia;o__Methanosarcinales;f__Methanosarcinaceae;g__Methanosarcina;s__Methanosarcina sp003164755	Methanosarcina sp.	Archaea;Euryarchaeota;Stenosarchaea group	bog_70	SAMN08179930	PRJNA386568	Scaffold	3.46849	35.8		PLUB01	124	0	2018-05-25T00:00:00Z	ftp://ftp.ncbi.nlm.nih.gov/genomes/all/GCA/003/164/755/GCA_003164755.1_20120700_S1D
GCA_020804225.1	d__Archaea;p__Halobacteriota;c__Methanosarcinia;o__Methanosarcinales;f__Methanosarcinaceae;g__Methanosarcina;s__Methanosarcina sp020804225	Methanosarcina sp. DH2	Archaea;Euryarchaeota;Stenosarchaea group	DH2	SAMN12616828	PRJNA561362	Scaffold	4.59608	41.7		WJBI01	37	3737	2021-11-08T00:00:00Z	ftp://ftp.ncbi.nlm.nih.gov/genomes/all/GCA/020/804/225/GCA_020804225.1_ASM2080422v1	ftp://ftp.ncbi.nlm.nih.gov/genomes/all/GCF/020/804/225/GCF_020804225.1_ASM2080422v1
GCA_013331265.1	d__Archaea;p__Halobacteriota;c__Methanosarcinia;o__Methanosarcinales;f__Methanosarcinaceae;g__Methanosarcina;s__Methanosarcina sp10923u	Methanosarcina sp.	Archaea;Euryarchaeota;Stenosarchaea group	UBA10923	SAMN13192968	PRJNA593905	Scaffold	3.29588	40.2		DUGS01	217	2864	2020-06-11T00:00:00Z	ftp://ftp.ncbi.nlm.nih.gov/genomes/all/GCA/013/331/265/GCA_013331265.1_ASM1333126v1
GCA_013331275.1	d__Archaea;p__Halobacteriota;c__Methanosarcinia;o__Methanosarcinales;f__Methanosarcinaceae;g__Methanosarcina;s__Methanosarcina sp11020u	Methanosarcina sp.	Archaea;Euryarchaeota;Stenosarchaea group	UBA11020	SAMN13192969	PRJNA593905	Scaffold	4.33064	38		DUGT01	224	3541	2020-06-11T00:00:00Z	ftp://ftp.ncbi.nlm.nih.gov/genomes/all/GCA/013/331/275/GCA_013331275.1_ASM1333127v1
GCA_013330315.1	d__Archaea;p__Halobacteriota;c__Methanosarcinia;o__Methanosarcinales;f__Methanosarcinaceae;g__Methanosarcina;s__Methanosarcina sp8098u	Methanosarcina sp.	Archaea;Euryarchaeota;Stenosarchaea group	UBA8098	SAMN13193016	PRJNA593905	Scaffold	2.34003	41.4		DUIO01	360	1963	2020-06-11T00:00:00Z	ftp://ftp.ncbi.nlm.nih.gov/genomes/all/GCA/013/330/315/GCA_013330315.1_ASM1333031v1
GCA_002508465.1	d__Archaea;p__Halobacteriota;c__Methanosarcinia;o__Methanosarcinales;f__Methanosarcinaceae;g__Methanosarcina;s__Methanosarcina spelaei	Methanosarcina sp. UBA7	Archaea;Euryarchaeota;Stenosarchaea group	UBA7	SAMN06027403	PRJNA348753	Scaffold	4.26097	39		DAQQ01	293	0	2017-10-11T00:00:00Z	ftp://ftp.ncbi.nlm.nih.gov/genomes/all/GCA/002/508/465/GCA_002508465.1_ASM250846v1
GCA_000969885.1	d__Archaea;p__Halobacteriota;c__Methanosarcinia;o__Methanosarcinales;f__Methanosarcinaceae;g__Methanosarcina;s__Methanosarcina thermophila	Methanosarcina thermophila TM-1	Archaea;Euryarchaeota;Stenosarchaea group	TM-1	SAMN03074597	PRJNA230961	Complete	3.12738	41.1	chromosome:NZ_CP009501.1/CP009501.1		1	2673	2015-04-07T00:00:00Z	ftp://ftp.ncbi.nlm.nih.gov/genomes/all/GCA/000/969/885/GCA_000969885.1_ASM96988v1	ftp://ftp.ncbi.nlm.nih.gov/genomes/all/GCF/000/969/885/GCF_000969885.1_ASM96988v1
GCA_000969925.1	d__Archaea;p__Halobacteriota;c__Methanosarcinia;o__Methanosarcinales;f__Methanosarcinaceae;g__Methanosarcina;s__Methanosarcina thermophila	Methanosarcina thermophila CHTI-55	Archaea;Euryarchaeota;Stenosarchaea group	CHTI-55	SAMN03074595	PRJNA230959	Complete	3.13023	41.2	chromosome:NZ_CP009502.1/CP009502.1		1	2590	2015-04-07T00:00:00Z	ftp://ftp.ncbi.nlm.nih.gov/genomes/all/GCA/000/969/925/GCA_000969925.1_ASM96992v1	ftp://ftp.ncbi.nlm.nih.gov/genomes/all/GCF/000/969/925/GCF_000969925.1_ASM96992v1
GCA_900116525.1	d__Archaea;p__Halobacteriota;c__Methanosarcinia;o__Methanosarcinales;f__Methanosarcinaceae;g__Methanosarcina;s__Methanosarcina thermophila	Methanosarcina thermophila	Archaea;Euryarchaeota;Stenosarchaea group	DSM 11855	SAMN02910340	PRJEB17571	Scaffold	3.1006	41.3		FPAO01	23	2628	2016-11-02T00:00:00Z	ftp://ftp.ncbi.nlm.nih.gov/genomes/all/GCA/900/116/525/GCA_900116525.1_IMG-taxon_2595698250_annotated_assembly	ftp://ftp.ncbi.nlm.nih.gov/genomes/all/GCF/900/116/525/GCF_900116525.1_IMG-taxon_2595698250_annotated_assembly
GCA_003584605.1	d__Archaea;p__Halobacteriota;c__Methanosarcinia;o__Methanosarcinales;f__Methanosarcinaceae;g__Methanosarcina;s__Methanosarcina thermophila	Methanosarcina thermophila	Archaea;Euryarchaeota;Stenosarchaea group	MT-1	SAMD00060421	PRJDB5067	Complete	3.19406	41.2	chromosome:AP017646.1		1	2772	2016-12-07T23:02:00Z	ftp://ftp.ncbi.nlm.nih.gov/genomes/all/GCA/003/584/605/GCA_003584605.1_ASM358460v1
GCA_002497045.1	d__Archaea;p__Halobacteriota;c__Methanosarcinia;o__Methanosarcinales;f__Methanosarcinaceae;g__Methanosarcina;s__Methanosarcina thermophila	Methanosarcina sp. UBA135	Archaea;Euryarchaeota;Stenosarchaea group	UBA135	SAMN06027131	PRJNA348753	Scaffold	2.43413	41.6		DAMI01	280	0	2017-10-10T00:00:00Z	ftp://ftp.ncbi.nlm.nih.gov/genomes/all/GCA/002/497/045/GCA_002497045.1_ASM249704v1
GCA_000969945.1	d__Archaea;p__Halobacteriota;c__Methanosarcinia;o__Methanosarcinales;f__Methanosarcinaceae;g__Methanosarcina;s__Methanosarcina vacuolata	Methanosarcina sp. Kolksee	Archaea;Euryarchaeota;Stenosarchaea group	Kolksee	SAMN03074590	PRJNA230954	Complete	4.55349	39.8331	chromosome:NZ_CP009524.1/CP009524.1; plasmid unnamed:NZ_CP009523.1/CP009523.1		2	3592	2015-04-07T00:00:00Z	ftp://ftp.ncbi.nlm.nih.gov/genomes/all/GCA/000/969/945/GCA_000969945.1_ASM96994v1	ftp://ftp.ncbi.nlm.nih.gov/genomes/all/GCF/000/969/945/GCF_000969945.1_ASM96994v1
GCA_000969905.1	d__Archaea;p__Halobacteriota;c__Methanosarcinia;o__Methanosarcinales;f__Methanosarcinaceae;g__Methanosarcina;s__Methanosarcina vacuolata	Methanosarcina vacuolata Z-761	Archaea;Euryarchaeota;Stenosarchaea group	Z-761	SAMN03074598	PRJNA230962	Complete	4.56388	39.7325	chromosome:NZ_CP009520.1/CP009520.1; plasmid unnamed:NZ_CP009519.1/CP009519.1		2	3561	2015-04-07T00:00:00Z	ftp://ftp.ncbi.nlm.nih.gov/genomes/all/GCA/000/969/905/GCA_000969905.1_ASM96990v1	ftp://ftp.ncbi.nlm.nih.gov/genomes/all/GCF/000/969/905/GCF_000969905.1_ASM96990v1
GCA_020804205.1	d__Archaea;p__Halobacteriota;c__Methanosarcinia;o__Methanosarcinales;f__Methanosarcinaceae;g__Methanosarcina;s__Methanosarcina vacuolata	Methanosarcina sp. DH1	Archaea;Euryarchaeota;Stenosarchaea group	DH1	SAMN12616996	PRJNA561374	Scaffold	4.57483	39.9		WJBJ01	51	3618	2021-11-08T00:00:00Z	ftp://ftp.ncbi.nlm.nih.gov/genomes/all/GCA/020/804/205/GCA_020804205.1_ASM2080420v1	ftp://ftp.ncbi.nlm.nih.gov/genomes/all/GCF/020/804/205/GCF_020804205.1_ASM2080420v1
GCA_000970045.1	d__Archaea;p__Halobacteriota;c__Methanosarcinia;o__Methanosarcinales;f__Methanosarcinaceae;g__MTP4;s__MTP4 sp000970045	Methanosarcina sp. MTP4	Archaea;Euryarchaeota;Stenosarchaea group	MTP4	SAMN03074591	PRJNA230955	Complete	4.21147	45.9	chromosome:NZ_CP009505.1/CP009505.1		1	3404	2015-04-07T00:00:00Z	ftp://ftp.ncbi.nlm.nih.gov/genomes/all/GCA/000/970/045/GCA_000970045.1_ASM97004v1	ftp://ftp.ncbi.nlm.nih.gov/genomes/all/GCF/000/970/045/GCF_000970045.1_ASM97004v1
GCA_016841785.1	d__Archaea;p__Halobacteriota;c__Methanosarcinia;o__Methanosarcinales;f__Methanosarcinaceae;g__MTP4;s__MTP4 sp000970045	Euryarchaeota archaeon	Archaea;Euryarchaeota;unclassified Euryarchaeota	B5_bin.10	SAMN14918428	PRJNA630030	Scaffold	4.16317	45.8		JAENYL01	64	0	2021-02-09T00:00:00Z	ftp://ftp.ncbi.nlm.nih.gov/genomes/all/GCA/016/841/785/GCA_016841785.1_ASM1684178v1
GCA_016841265.1	d__Archaea;p__Halobacteriota;c__Methanosarcinia;o__Methanosarcinales;f__Methanosarcinaceae;g__MTP4;s__MTP4 sp016841265	Euryarchaeota archaeon	Archaea;Euryarchaeota;unclassified Euryarchaeota	BM5_bin.6	SAMN14918455	PRJNA630030	Scaffold	3.65355	46		JAENZL01	67	0	2021-02-09T00:00:00Z	ftp://ftp.ncbi.nlm.nih.gov/genomes/all/GCA/016/841/265/GCA_016841265.1_ASM1684126v1
GCA_016841625.1	d__Archaea;p__Halobacteriota;c__Methanosarcinia;o__Methanosarcinales;f__Methanosarcinaceae;g__MTP4;s__MTP4 sp016841625	Euryarchaeota archaeon	Archaea;Euryarchaeota;unclassified Euryarchaeota	BL5_bin.6	SAMN14918437	PRJNA630030	Scaffold	3.75599	46.2		JAENYU01	63	0	2021-02-09T00:00:00Z	ftp://ftp.ncbi.nlm.nih.gov/genomes/all/GCA/016/841/625/GCA_016841625.1_ASM1684162v1
GCA_013329415.1	d__Archaea;p__Halobacteriota;c__Methanosarcinia;o__Methanosarcinales;f__Methanosarcinaceae;g__MTP4;s__MTP4 sp9310u	Methanosarcinaceae archaeon	Archaea;Euryarchaeota;Stenosarchaea group	UBA9310	SAMN13193061	PRJNA593905	Scaffold	3.85524	45.1		DUKH01	226	3072	2020-06-11T00:00:00Z	ftp://ftp.ncbi.nlm.nih.gov/genomes/all/GCA/013/329/415/GCA_013329415.1_ASM1332941v1
GCA_003162615.1	d__Archaea;p__Halobacteriota;c__Methanosarcinia;o__Methanotrichales;f__Methanotrichaceae;g__Fen-7;s__Fen-7 sp003162615	Methanothrix sp.	Archaea;Euryarchaeota;Stenosarchaea group	fen_7	SAMN08178753	PRJNA386568	Scaffold	2.71616	49.4		PMNG01	216	0	2018-05-25T00:00:00Z	ftp://ftp.ncbi.nlm.nih.gov/genomes/all/GCA/003/162/615/GCA_003162615.1_20100900_E3D
GCA_003170635.1	d__Archaea;p__Halobacteriota;c__Methanosarcinia;o__Methanotrichales;f__Methanotrichaceae;g__Fen-7;s__Fen-7 sp003162615	Methanothrix sp.	Archaea;Euryarchaeota;Stenosarchaea group	fen_31	SAMN08179061	PRJNA386568	Scaffold	1.5331	51		PMYV01	239	0	2018-05-25T00:00:00Z	ftp://ftp.ncbi.nlm.nih.gov/genomes/all/GCA/003/170/635/GCA_003170635.1_20110800_E2M
GCA_003157115.1	d__Archaea;p__Halobacteriota;c__Methanosarcinia;o__Methanotrichales;f__Methanotrichaceae;g__Fen-7;s__Fen-7 sp003162615	Methanothrix sp.	Archaea;Euryarchaeota;Stenosarchaea group	fen_54	SAMN08179606	PRJNA386568	Scaffold	2.28214	49.6		PMIM01	378	0	2018-05-24T00:00:00Z	ftp://ftp.ncbi.nlm.nih.gov/genomes/all/GCA/003/157/115/GCA_003157115.1_20120600_E3D
GCA_003157915.1	d__Archaea;p__Halobacteriota;c__Methanosarcinia;o__Methanotrichales;f__Methanotrichaceae;g__Fen-7;s__Fen-7 sp003162615	Methanothrix sp.	Archaea;Euryarchaeota;Stenosarchaea group	fen_46	SAMN08179541	PRJNA386568	Scaffold	1.34614	51.3		PMKY01	249	0	2018-05-24T00:00:00Z	ftp://ftp.ncbi.nlm.nih.gov/genomes/all/GCA/003/157/915/GCA_003157915.1_20120600_E1D
GCA_002503085.1	d__Archaea;p__Halobacteriota;c__Methanosarcinia;o__Methanotrichales;f__Methanotrichaceae;g__Methanothrix_A;s__Methanothrix_A harundinacea_A	Methanothrix harundinacea	Archaea;Euryarchaeota;Stenosarchaea group	UBA205	SAMN06027570	PRJNA348753	Scaffold	2.50853	55.5		DAQZ01	144	0	2017-10-10T00:00:00Z	ftp://ftp.ncbi.nlm.nih.gov/genomes/all/GCA/002/503/085/GCA_002503085.1_ASM250308v1
GCA_002506535.1	d__Archaea;p__Halobacteriota;c__Methanosarcinia;o__Methanotrichales;f__Methanotrichaceae;g__Methanothrix_A;s__Methanothrix_A harundinacea_B	Methanothrix harundinacea	Archaea;Euryarchaeota;Stenosarchaea group	UBA475	SAMN06027621	PRJNA348753	Scaffold	2.34238	58.8		DAXT01	25	0	2017-10-10T00:00:00Z	ftp://ftp.ncbi.nlm.nih.gov/genomes/all/GCA/002/506/535/GCA_002506535.1_ASM250653v1
GCA_002502405.1	d__Archaea;p__Halobacteriota;c__Methanosarcinia;o__Methanotrichales;f__Methanotrichaceae;g__Methanothrix_A;s__Methanothrix_A harundinacea_B	Methanothrix harundinacea	Archaea;Euryarchaeota;Stenosarchaea group	UBA146	SAMN06027037	PRJNA348753	Scaffold	2.32835	58.7		DAOS01	42	0	2017-10-10T00:00:00Z	ftp://ftp.ncbi.nlm.nih.gov/genomes/all/GCA/002/502/405/GCA_002502405.1_ASM250240v1
GCA_002497705.1	d__Archaea;p__Halobacteriota;c__Methanosarcinia;o__Methanotrichales;f__Methanotrichaceae;g__Methanothrix_A;s__Methanothrix_A harundinacea_B	Methanothrix harundinacea	Archaea;Euryarchaeota;Stenosarchaea group	UBA246	SAMN06027618	PRJNA348753	Scaffold	1.74816	59.8		DAEK01	213	0	2017-10-10T00:00:00Z	ftp://ftp.ncbi.nlm.nih.gov/genomes/all/GCA/002/497/705/GCA_002497705.1_ASM249770v1
GCA_002503835.1	d__Archaea;p__Halobacteriota;c__Methanosarcinia;o__Methanotrichales;f__Methanotrichaceae;g__Methanothrix_A;s__Methanothrix_A harundinacea_B	Methanothrix harundinacea	Archaea;Euryarchaeota;Stenosarchaea group	UBA435	SAMN06027557	PRJNA348753	Scaffold	1.86483	59.6		DASN01	223	0	2017-10-10T00:00:00Z	ftp://ftp.ncbi.nlm.nih.gov/genomes/all/GCA/002/503/835/GCA_002503835.1_ASM250383v1
GCA_002496165.1	d__Archaea;p__Halobacteriota;c__Methanosarcinia;o__Methanotrichales;f__Methanotrichaceae;g__Methanothrix_A;s__Methanothrix_A harundinacea_D	Methanothrix harundinacea	Archaea;Euryarchaeota;Stenosarchaea group	UBA534	SAMN06027051	PRJNA348753	Scaffold	2.31798	56.7		DAIR01	85	0	2017-10-10T00:00:00Z	ftp://ftp.ncbi.nlm.nih.gov/genomes/all/GCA/002/496/165/GCA_002496165.1_ASM249616v1
GCA_001509375.1	d__Archaea;p__Halobacteriota;c__Methanosarcinia;o__Methanotrichales;f__Methanotrichaceae;g__Methanothrix_A;s__Methanothrix_A harundinacea_D	Methanothrix harundinacea	Archaea;Euryarchaeota;Stenosarchaea group	57_489	SAMN03445147	PRJNA278302	Scaffold	2.38296	56.5		LGFT01	118	2441	2016-01-08T00:00:00Z	ftp://ftp.ncbi.nlm.nih.gov/genomes/all/GCA/001/509/375/GCA_001509375.1_ASM150937v1
GCA_022839835.1	d__Archaea;p__Halobacteriota;c__Methanosarcinia;o__Methanotrichales;f__Methanotrichaceae;g__Methanothrix_A;s__Methanothrix_A harundinacea_D	Methanothrix harundinacea	Archaea;Euryarchaeota;Stenosarchaea group	7-NCT_033	SAMN26856832	PRJNA818325	Scaffold	2.52352	56.1		JALHJF01	144	0	2022-04-08T00:00:00Z	ftp://ftp.ncbi.nlm.nih.gov/genomes/all/GCA/022/839/835/GCA_022839835.1_ASM2283983v1
GCA_022837155.1	d__Archaea;p__Halobacteriota;c__Methanosarcinia;o__Methanotrichales;f__Methanotrichaceae;g__Methanothrix_A;s__Methanothrix_A harundinacea_D	Methanothrix harundinacea	Archaea;Euryarchaeota;Stenosarchaea group	8-LJY_030	SAMN26856850	PRJNA818325	Scaffold	2.41776	56.6		JALHJX01	129	0	2022-04-08T00:00:00Z	ftp://ftp.ncbi.nlm.nih.gov/genomes/all/GCA/022/837/155/GCA_022837155.1_ASM2283715v1
GCA_022837945.1	d__Archaea;p__Halobacteriota;c__Methanosarcinia;o__Methanotrichales;f__Methanotrichaceae;g__Methanothrix_A;s__Methanothrix_A harundinacea_D	Methanothrix harundinacea	Archaea;Euryarchaeota;Stenosarchaea group	5-aug_S3_049	SAMN26856815	PRJNA818325	Scaffold	2.58852	56.1		JALHIO01	167	0	2022-04-08T00:00:00Z	ftp://ftp.ncbi.nlm.nih.gov/genomes/all/GCA/022/837/945/GCA_022837945.1_ASM2283794v1
GCA_022837565.1	d__Archaea;p__Halobacteriota;c__Methanosarcinia;o__Methanotrichales;f__Methanotrichaceae;g__Methanothrix_A;s__Methanothrix_A harundinacea_D	Methanothrix harundinacea	Archaea;Euryarchaeota;Stenosarchaea group	4-aug_S1_064	SAMN26856781	PRJNA818325	Scaffold	2.67149	55.9		JALHHG01	166	0	2022-04-08T00:00:00Z	ftp://ftp.ncbi.nlm.nih.gov/genomes/all/GCA/022/837/565/GCA_022837565.1_ASM2283756v1
GCA_000235565.1	d__Archaea;p__Halobacteriota;c__Methanosarcinia;o__Methanotrichales;f__Methanotrichaceae;g__Methanothrix_A;s__Methanothrix_A harundinacea_E	Methanosaeta harundinacea 6Ac	Archaea;Euryarchaeota;Stenosarchaea group	6Ac	SAMN02603883	PRJNA76151	Complete	2.57103	60.5692	chromosome:NC_017527.1/CP003117.1; plasmid pH6Ac:NC_016637.1/CP003118.1		2	2466	2011-11-16T00:00:00Z	ftp://ftp.ncbi.nlm.nih.gov/genomes/all/GCA/000/235/565/GCA_000235565.1_ASM23556v1	ftp://ftp.ncbi.nlm.nih.gov/genomes/all/GCF/000/235/565/GCF_000235565.1_ASM23556v1
GCA_001603195.1	d__Archaea;p__Halobacteriota;c__Methanosarcinia;o__Methanotrichales;f__Methanotrichaceae;g__Methanothrix_A;s__Methanothrix_A harundinacea_E	Methanosarcinales archaeon Methan_02	Archaea;Euryarchaeota;Stenosarchaea group	Methan_02	SAMN03837484	PRJNA284316	Scaffold	2.47589	60.8		LUYF01	419	0	2016-03-30T00:00:00Z	ftp://ftp.ncbi.nlm.nih.gov/genomes/all/GCA/001/603/195/GCA_001603195.1_ASM160319v1
GCA_002497945.1	d__Archaea;p__Halobacteriota;c__Methanosarcinia;o__Methanotrichales;f__Methanotrichaceae;g__Methanothrix_A;s__Methanothrix_A harundinacea_E	Methanothrix harundinacea	Archaea;Euryarchaeota;Stenosarchaea group	UBA281	SAMN06027070	PRJNA348753	Scaffold	2.05585	61.1		DAFK01	48	0	2017-10-10T00:00:00Z	ftp://ftp.ncbi.nlm.nih.gov/genomes/all/GCA/002/497/945/GCA_002497945.1_ASM249794v1
GCA_002503805.1	d__Archaea;p__Halobacteriota;c__Methanosarcinia;o__Methanotrichales;f__Methanotrichaceae;g__Methanothrix_A;s__Methanothrix_A harundinacea_E	Methanothrix harundinacea	Archaea;Euryarchaeota;Stenosarchaea group	UBA152	SAMN06027500	PRJNA348753	Scaffold	1.83869	62		DASM01	181	0	2017-10-10T00:00:00Z	ftp://ftp.ncbi.nlm.nih.gov/genomes/all/GCA/002/503/805/GCA_002503805.1_ASM250380v1
GCA_001602645.1	d__Archaea;p__Halobacteriota;c__Methanosarcinia;o__Methanotrichales;f__Methanotrichaceae;g__Methanothrix_A;s__Methanothrix_A sp001602645	Methanosarcinales archaeon Methan_01	Archaea;Euryarchaeota;Stenosarchaea group	Methan_01	SAMN03837483	PRJNA284316	Scaffold	2.6088	59.1		LUYE01	85	0	2016-03-30T00:00:00Z	ftp://ftp.ncbi.nlm.nih.gov/genomes/all/GCA/001/602/645/GCA_001602645.1_ASM160264v1
GCA_002497555.1	d__Archaea;p__Halobacteriota;c__Methanosarcinia;o__Methanotrichales;f__Methanotrichaceae;g__Methanothrix_A;s__Methanothrix_A sp001602645	Methanothrix harundinacea	Archaea;Euryarchaeota;Stenosarchaea group	UBA532	SAMN06027057	PRJNA348753	Scaffold	2.41802	59.5		DADM01	34	0	2017-10-10T00:00:00Z	ftp://ftp.ncbi.nlm.nih.gov/genomes/all/GCA/002/497/555/GCA_002497555.1_ASM249755v1
GCA_022840035.1	d__Archaea;p__Halobacteriota;c__Methanosarcinia;o__Methanotrichales;f__Methanotrichaceae;g__Methanothrix_A;s__Methanothrix_A sp001602645	Methanothrix sp.	Archaea;Euryarchaeota;Stenosarchaea group	5-aug_S3_040	SAMN26856811	PRJNA818325	Scaffold	2.67101	59		JALHIK01	103	0	2022-04-08T00:00:00Z	ftp://ftp.ncbi.nlm.nih.gov/genomes/all/GCA/022/840/035/GCA_022840035.1_ASM2284003v1
GCA_022839685.1	d__Archaea;p__Halobacteriota;c__Methanosarcinia;o__Methanotrichales;f__Methanotrichaceae;g__Methanothrix_A;s__Methanothrix_A sp001602645	Methanothrix sp.	Archaea;Euryarchaeota;Stenosarchaea group	7-NCT_017	SAMN26856825	PRJNA818325	Scaffold	2.68867	58.9		JALHIY01	91	0	2022-04-08T00:00:00Z	ftp://ftp.ncbi.nlm.nih.gov/genomes/all/GCA/022/839/685/GCA_022839685.1_ASM2283968v1
GCA_022837645.1	d__Archaea;p__Halobacteriota;c__Methanosarcinia;o__Methanotrichales;f__Methanotrichaceae;g__Methanothrix_A;s__Methanothrix_A sp001602645	Methanothrix sp.	Archaea;Euryarchaeota;Stenosarchaea group	4-aug_S1_056	SAMN26856777	PRJNA818325	Scaffold	2.54771	59.3		JALHHC01	105	0	2022-04-08T00:00:00Z	ftp://ftp.ncbi.nlm.nih.gov/genomes/all/GCA/022/837/645/GCA_022837645.1_ASM2283764v1
GCA_022837215.1	d__Archaea;p__Halobacteriota;c__Methanosarcinia;o__Methanotrichales;f__Methanotrichaceae;g__Methanothrix_A;s__Methanothrix_A sp001602645	Methanothrix sp.	Archaea;Euryarchaeota;Stenosarchaea group	8-LJY_016	SAMN26856846	PRJNA818325	Scaffold	2.46511	59.7		JALHJT01	119	0	2022-04-08T00:00:00Z	ftp://ftp.ncbi.nlm.nih.gov/genomes/all/GCA/022/837/215/GCA_022837215.1_ASM2283721v1
GCA_002505025.1	d__Archaea;p__Halobacteriota;c__Methanosarcinia;o__Methanotrichales;f__Methanotrichaceae;g__Methanothrix_A;s__Methanothrix_A sp001602645	Methanothrix harundinacea	Archaea;Euryarchaeota;Stenosarchaea group	UBA79	SAMN06027458	PRJNA348753	Scaffold	2.48159	59.5		DAUF01	97	0	2017-10-10T00:00:00Z	ftp://ftp.ncbi.nlm.nih.gov/genomes/all/GCA/002/505/025/GCA_002505025.1_ASM250502v1
GCA_002498505.1	d__Archaea;p__Halobacteriota;c__Methanosarcinia;o__Methanotrichales;f__Methanotrichaceae;g__Methanothrix_A;s__Methanothrix_A sp001602645	Methanothrix harundinacea	Archaea;Euryarchaeota;Stenosarchaea group	UBA476	SAMN06027604	PRJNA348753	Scaffold	2.24086	59.8		DAHQ01	88	0	2017-10-10T00:00:00Z	ftp://ftp.ncbi.nlm.nih.gov/genomes/all/GCA/002/498/505/GCA_002498505.1_ASM249850v1
GCA_020844795.1	d__Archaea;p__Halobacteriota;c__Methanosarcinia;o__Methanotrichales;f__Methanotrichaceae;g__Methanothrix_A;s__Methanothrix_A sp020844795	Methanothrix sp.	Archaea;Euryarchaeota;Stenosarchaea group	MAG 280	SAMN18737512	PRJNA567733	Chromosome	2.02018	59.4	chromosome:CP086218.1		1	2237	2021-11-12T00:00:00Z	ftp://ftp.ncbi.nlm.nih.gov/genomes/all/GCA/020/844/795/GCA_020844795.1_ASM2084479v1
GCA_013329455.1	d__Archaea;p__Halobacteriota;c__Methanosarcinia;o__Methanotrichales;f__Methanotrichaceae;g__Methanothrix_A;s__Methanothrix_A sp9297u	Methanotrichaceae archaeon	Archaea;Euryarchaeota;Stenosarchaea group	UBA9297	SAMN13193059	PRJNA593905	Scaffold	2.1715	54.8		DUKF01	273	2224	2020-06-11T00:00:00Z	ftp://ftp.ncbi.nlm.nih.gov/genomes/all/GCA/013/329/455/GCA_013329455.1_ASM1332945v1
GCA_000014945.1	d__Archaea;p__Halobacteriota;c__Methanosarcinia;o__Methanotrichales;f__Methanotrichaceae;g__Methanothrix_B;s__Methanothrix_B thermoacetophila	Methanothrix thermoacetophila PT	Archaea;Euryarchaeota;Stenosarchaea group	PT	SAMN02598350	PRJNA15765	Complete	1.87947	53.5	chromosome:NC_008553.1/CP000477.1		1	1743	2006-10-25T00:00:00Z	ftp://ftp.ncbi.nlm.nih.gov/genomes/all/GCA/000/014/945/GCA_000014945.1_ASM1494v1	ftp://ftp.ncbi.nlm.nih.gov/genomes/all/GCF/000/014/945/GCF_000014945.1_ASM1494v1
GCA_022710045.1	d__Archaea;p__Halobacteriota;c__Methanosarcinia;o__Methanotrichales;f__Methanotrichaceae;g__Methanothrix;s__	Methanothrix sp.	Archaea;Euryarchaeota;Stenosarchaea group	RA.bin68	SAMN25008260	PRJNA797519	Scaffold	2.26866	52.2		JAKLHR01	234	0	2022-03-28T00:00:00Z	ftp://ftp.ncbi.nlm.nih.gov/genomes/all/GCA/022/710/045/GCA_022710045.1_ASM2271004v1
GCA_023228345.1	d__Archaea;p__Halobacteriota;c__Methanosarcinia;o__Methanotrichales;f__Methanotrichaceae;g__Methanothrix;s__	Methanothrix sp.	Archaea;Euryarchaeota;Stenosarchaea group	SO_2017_LW3 bin 118	SAMN27301908	PRJNA823399	Scaffold	2.60028	51.2		JALOBJ01	496	2906	2022-05-03T00:00:00Z	ftp://ftp.ncbi.nlm.nih.gov/genomes/all/GCA/023/228/345/GCA_023228345.1_ASM2322834v1
GCA_013335125.1	d__Archaea;p__Halobacteriota;c__Methanosarcinia;o__Methanotrichales;f__Methanotrichaceae;g__Methanothrix;s__	Methanothrix sp.	Archaea;Euryarchaeota;Stenosarchaea group	W9_Combined_metabat1_126	SAMN14482965	PRJNA615962	Scaffold	1.14873	49.1		JAAXWH01	463	1393	2020-06-11T00:00:00Z	ftp://ftp.ncbi.nlm.nih.gov/genomes/all/GCA/013/335/125/GCA_013335125.1_ASM1333512v1
GCA_000204415.1	d__Archaea;p__Halobacteriota;c__Methanosarcinia;o__Methanotrichales;f__Methanotrichaceae;g__Methanothrix;s__Methanothrix soehngenii	Methanothrix soehngenii GP6	Archaea;Euryarchaeota;Stenosarchaea group	GP6	SAMN02604263	PRJNA63185	Complete	3.02664	50.9577	chromosome:NC_015416.1/CP002565.1; plasmid pGP6:NC_015430.1/CP002566.1		2	2899	2011-04-15T00:00:00Z	ftp://ftp.ncbi.nlm.nih.gov/genomes/all/GCA/000/204/415/GCA_000204415.1_ASM20441v1	ftp://ftp.ncbi.nlm.nih.gov/genomes/all/GCF/000/204/415/GCF_000204415.1_ASM20441v1
GCA_001603225.1	d__Archaea;p__Halobacteriota;c__Methanosarcinia;o__Methanotrichales;f__Methanotrichaceae;g__Methanothrix;s__Methanothrix soehngenii	Methanosarcinales archaeon Methan_04	Archaea;Euryarchaeota;Stenosarchaea group	Methan_04	SAMN03837486	PRJNA284316	Scaffold	1.92773	53.4		LUYH01	292	0	2016-03-30T00:00:00Z	ftp://ftp.ncbi.nlm.nih.gov/genomes/all/GCA/001/603/225/GCA_001603225.1_ASM160322v1
GCA_020844815.1	d__Archaea;p__Halobacteriota;c__Methanosarcinia;o__Methanotrichales;f__Methanotrichaceae;g__Methanothrix;s__Methanothrix soehngenii	Methanothrix sp.	Archaea;Euryarchaeota;Stenosarchaea group	MAG 281	SAMN18737513	PRJNA567733	Chromosome	2.38361	52.1	chromosome:CP086219.1		1	2543	2021-11-12T00:00:00Z	ftp://ftp.ncbi.nlm.nih.gov/genomes/all/GCA/020/844/815/GCA_020844815.1_ASM2084481v1
GCA_023228095.1	d__Archaea;p__Halobacteriota;c__Methanosarcinia;o__Methanotrichales;f__Methanotrichaceae;g__Methanothrix;s__Methanothrix soehngenii	Methanothrix soehngenii	Archaea;Euryarchaeota;Stenosarchaea group	SO_2017_LW3 bin 99	SAMN27301920	PRJNA823399	Scaffold	2.30691	52.3		JALOBV01	310	2488	2022-05-03T00:00:00Z	ftp://ftp.ncbi.nlm.nih.gov/genomes/all/GCA/023/228/095/GCA_023228095.1_ASM2322809v1
GCA_017994095.1	d__Archaea;p__Halobacteriota;c__Methanosarcinia;o__Methanotrichales;f__Methanotrichaceae;g__Methanothrix;s__Methanothrix soehngenii	Methanothrix sp.	Archaea;Euryarchaeota;Stenosarchaea group	Go_UH_bin_176	SAMN18120163	PRJNA524094	Scaffold	2.79132	51.6		JAGOLN01	126	2784	2021-04-15T00:00:00Z	ftp://ftp.ncbi.nlm.nih.gov/genomes/all/GCA/017/994/095/GCA_017994095.1_ASM1799409v1
GCA_002496465.1	d__Archaea;p__Halobacteriota;c__Methanosarcinia;o__Methanotrichales;f__Methanotrichaceae;g__Methanothrix;s__Methanothrix soehngenii	Methanosaeta sp. UBA356	Archaea;Euryarchaeota;Stenosarchaea group	UBA356	SAMN06027240	PRJNA348753	Scaffold	2.57212	51.3		DAKC01	142	0	2017-10-10T00:00:00Z	ftp://ftp.ncbi.nlm.nih.gov/genomes/all/GCA/002/496/465/GCA_002496465.1_ASM249646v1
GCA_002496085.1	d__Archaea;p__Halobacteriota;c__Methanosarcinia;o__Methanotrichales;f__Methanotrichaceae;g__Methanothrix;s__Methanothrix soehngenii	Methanosaeta sp. UBA458	Archaea;Euryarchaeota;Stenosarchaea group	UBA458	SAMN06027335	PRJNA348753	Scaffold	2.4129	52.1		DAIK01	173	0	2017-10-10T00:00:00Z	ftp://ftp.ncbi.nlm.nih.gov/genomes/all/GCA/002/496/085/GCA_002496085.1_ASM249608v1
GCA_022839595.1	d__Archaea;p__Halobacteriota;c__Methanosarcinia;o__Methanotrichales;f__Methanotrichaceae;g__Methanothrix;s__Methanothrix soehngenii	Methanothrix sp.	Archaea;Euryarchaeota;Stenosarchaea group	7-NCT_001	SAMN26856820	PRJNA818325	Scaffold	2.33061	52.3		JALHIT01	295	0	2022-04-08T00:00:00Z	ftp://ftp.ncbi.nlm.nih.gov/genomes/all/GCA/022/839/595/GCA_022839595.1_ASM2283959v1
GCA_022839925.1	d__Archaea;p__Halobacteriota;c__Methanosarcinia;o__Methanotrichales;f__Methanotrichaceae;g__Methanothrix;s__Methanothrix soehngenii	Methanothrix sp.	Archaea;Euryarchaeota;Stenosarchaea group	5-aug_S3_005	SAMN26856791	PRJNA818325	Scaffold	2.4846	52.2		JALHHQ01	329	0	2022-04-08T00:00:00Z	ftp://ftp.ncbi.nlm.nih.gov/genomes/all/GCA/022/839/925/GCA_022839925.1_ASM2283992v1
GCA_002503445.1	d__Archaea;p__Halobacteriota;c__Methanosarcinia;o__Methanotrichales;f__Methanotrichaceae;g__Methanothrix;s__Methanothrix soehngenii	Methanosaeta sp. UBA243	Archaea;Euryarchaeota;Stenosarchaea group	UBA243	SAMN06027634	PRJNA348753	Scaffold	1.87975	52.7		DART01	215	0	2017-10-10T00:00:00Z	ftp://ftp.ncbi.nlm.nih.gov/genomes/all/GCA/002/503/445/GCA_002503445.1_ASM250344v1
GCA_002507265.1	d__Archaea;p__Halobacteriota;c__Methanosarcinia;o__Methanotrichales;f__Methanotrichaceae;g__Methanothrix;s__Methanothrix soehngenii	Methanosaeta sp. UBA332	Archaea;Euryarchaeota;Stenosarchaea group	UBA332	SAMN06027488	PRJNA348753	Scaffold	2.09432	50.9		DAZJ01	180	0	2017-10-10T00:00:00Z	ftp://ftp.ncbi.nlm.nih.gov/genomes/all/GCA/002/507/265/GCA_002507265.1_ASM250726v1
GCA_022840505.1	d__Archaea;p__Halobacteriota;c__Methanosarcinia;o__Methanotrichales;f__Methanotrichaceae;g__Methanothrix;s__Methanothrix soehngenii	Methanothrix sp.	Archaea;Euryarchaeota;Stenosarchaea group	8-LJY_001	SAMN26856839	PRJNA818325	Scaffold	2.2517	52.3		JALHJM01	370	0	2022-04-08T00:00:00Z	ftp://ftp.ncbi.nlm.nih.gov/genomes/all/GCA/022/840/505/GCA_022840505.1_ASM2284050v1
GCA_022840385.1	d__Archaea;p__Halobacteriota;c__Methanosarcinia;o__Methanotrichales;f__Methanotrichaceae;g__Methanothrix;s__Methanothrix soehngenii	Methanothrix sp.	Archaea;Euryarchaeota;Stenosarchaea group	4-aug_S1_007	SAMN26856757	PRJNA818325	Scaffold	2.10056	52.3		JALHGI01	377	0	2022-04-08T00:00:00Z	ftp://ftp.ncbi.nlm.nih.gov/genomes/all/GCA/022/840/385/GCA_022840385.1_ASM2284038v1
GCA_018263315.1	d__Archaea;p__Halobacteriota;c__Methanosarcinia;o__Methanotrichales;f__Methanotrichaceae;g__Methanothrix;s__Methanothrix soehngenii	Methanothrix sp.	Archaea;Euryarchaeota;Stenosarchaea group	QR_Bin.3	SAMN16122906	PRJNA663217	Scaffold	1.25343	54.3		JADFDA01	182	0	2021-05-04T00:00:00Z	ftp://ftp.ncbi.nlm.nih.gov/genomes/all/GCA/018/263/315/GCA_018263315.1_ASM1826331v1
GCA_002507035.1	d__Archaea;p__Halobacteriota;c__Methanosarcinia;o__Methanotrichales;f__Methanotrichaceae;g__Methanothrix;s__Methanothrix soehngenii	Methanosaeta sp. UBA372	Archaea;Euryarchaeota;Stenosarchaea group	UBA372	SAMN06027549	PRJNA348753	Scaffold	2.18268	50		DAYU01	191	0	2017-10-10T00:00:00Z	ftp://ftp.ncbi.nlm.nih.gov/genomes/all/GCA/002/507/035/GCA_002507035.1_ASM250703v1
GCA_002502475.1	d__Archaea;p__Halobacteriota;c__Methanosarcinia;o__Methanotrichales;f__Methanotrichaceae;g__Methanothrix;s__Methanothrix soehngenii	Methanosaeta sp. UBA70	Archaea;Euryarchaeota;Stenosarchaea group	UBA70	SAMN06027461	PRJNA348753	Scaffold	1.99156	52.2		DAOX01	195	0	2017-10-10T00:00:00Z	ftp://ftp.ncbi.nlm.nih.gov/genomes/all/GCA/002/502/475/GCA_002502475.1_ASM250247v1
GCA_022841105.1	d__Archaea;p__Halobacteriota;c__Methanosarcinia;o__Methanotrichales;f__Methanotrichaceae;g__Methanothrix;s__Methanothrix soehngenii	Methanothrix sp.	Archaea;Euryarchaeota;Stenosarchaea group	1-no_shock_S1_008	SAMN26856659	PRJNA818325	Scaffold	2.05652	52.3		JALHCO01	471	0	2022-04-08T00:00:00Z	ftp://ftp.ncbi.nlm.nih.gov/genomes/all/GCA/022/841/105/GCA_022841105.1_ASM2284110v1
GCA_022840705.1	d__Archaea;p__Halobacteriota;c__Methanosarcinia;o__Methanotrichales;f__Methanotrichaceae;g__Methanothrix;s__Methanothrix soehngenii	Methanothrix sp.	Archaea;Euryarchaeota;Stenosarchaea group	2-no_aug_S1_008	SAMN26856690	PRJNA818325	Scaffold	2.12967	52.2		JALHDT01	518	0	2022-04-08T00:00:00Z	ftp://ftp.ncbi.nlm.nih.gov/genomes/all/GCA/022/840/705/GCA_022840705.1_ASM2284070v1
GCA_022839085.1	d__Archaea;p__Halobacteriota;c__Methanosarcinia;o__Methanotrichales;f__Methanotrichaceae;g__Methanothrix;s__Methanothrix soehngenii	Methanothrix sp.	Archaea;Euryarchaeota;Stenosarchaea group	3-JJ_aug_S1_006	SAMN26856722	PRJNA818325	Scaffold	2.01075	52.3		JALHEZ01	509	0	2022-04-08T00:00:00Z	ftp://ftp.ncbi.nlm.nih.gov/genomes/all/GCA/022/839/085/GCA_022839085.1_ASM2283908v1
GCA_002256575.1	d__Archaea;p__Halobacteriota;c__Methanosarcinia;o__Methanotrichales;f__Methanotrichaceae;g__Methanothrix;s__Methanothrix sp002256595	Methanosaeta sp. NSM2	Archaea;Euryarchaeota;Stenosarchaea group	NSM2	SAMN05908749	PRJNA338276	Scaffold	1.7516	54.7		NOLD01	238	1920	2017-08-16T00:00:00Z	ftp://ftp.ncbi.nlm.nih.gov/genomes/all/GCA/002/256/575/GCA_002256575.1_ASM225657v1
GCA_002256595.1	d__Archaea;p__Halobacteriota;c__Methanosarcinia;o__Methanotrichales;f__Methanotrichaceae;g__Methanothrix;s__Methanothrix sp002256595	Methanosaeta sp. NSP1	Archaea;Euryarchaeota;Stenosarchaea group	NSP1	SAMN05908746	PRJNA338276	Scaffold	1.47131	54.8		NOLC01	252	1714	2017-08-16T00:00:00Z	ftp://ftp.ncbi.nlm.nih.gov/genomes/all/GCA/002/256/595/GCA_002256595.1_ASM225659v1
GCA_013335585.1	d__Archaea;p__Halobacteriota;c__Methanosarcinia;o__Methanotrichales;f__Methanotrichaceae;g__Methanothrix;s__Methanothrix sp002256595	Methanothrix sp.	Archaea;Euryarchaeota;Stenosarchaea group	W9_Combined_metabat1_001	SAMN14482940	PRJNA615962	Scaffold	0.944938	55.1		JAAXVI01	317	1169	2020-06-11T00:00:00Z	ftp://ftp.ncbi.nlm.nih.gov/genomes/all/GCA/013/335/585/GCA_013335585.1_ASM1333558v1
GCA_019135935.1	d__Archaea;p__Halobacteriota;c__Methanosarcinia;o__Methanotrichales;f__Methanotrichaceae;g__Methanothrix;s__Methanothrix sp002505805	Methanosarcinales archaeon	Archaea;Euryarchaeota;Stenosarchaea group	WAS_Bin_40	SAMN18201478	PRJNA703818	Scaffold	0.888464	55.6		JAGVVC01	253	0	2021-07-06T00:00:00Z	ftp://ftp.ncbi.nlm.nih.gov/genomes/all/GCA/019/135/935/GCA_019135935.1_ASM1913593v1
GCA_002505805.1	d__Archaea;p__Halobacteriota;c__Methanosarcinia;o__Methanotrichales;f__Methanotrichaceae;g__Methanothrix;s__Methanothrix sp002505805	Methanosaeta sp. UBA80	Archaea;Euryarchaeota;Stenosarchaea group	UBA80	SAMN06027112	PRJNA348753	Scaffold	2.17111	52.9		DAWB01	244	0	2017-10-10T00:00:00Z	ftp://ftp.ncbi.nlm.nih.gov/genomes/all/GCA/002/505/805/GCA_002505805.1_ASM250580v1
GCA_011620785.1	d__Archaea;p__Halobacteriota;c__Methanosarcinia;o__Methanotrichales;f__Methanotrichaceae;g__Methanothrix;s__Methanothrix sp011620785	Methanothrix sp.	Archaea;Euryarchaeota;Stenosarchaea group	WOFA04	SAMN13475795	PRJNA592873	Scaffold	2.08808	52.8		WOYM01	125	0	2020-03-23T00:00:00Z	ftp://ftp.ncbi.nlm.nih.gov/genomes/all/GCA/011/620/785/GCA_011620785.1_ASM1162078v1
GCA_023229265.1	d__Archaea;p__Halobacteriota;c__Methanosarcinia;o__Methanotrichales;f__Methanotrichaceae;g__Methanothrix;s__Methanothrix sp011620785	Methanothrix sp.	Archaea;Euryarchaeota;Stenosarchaea group	SO_2017_LW1 bin 36	SAMN27301860	PRJNA823399	Scaffold	2.54616	51.8		JALNZN01	222	2711	2022-05-03T00:00:00Z	ftp://ftp.ncbi.nlm.nih.gov/genomes/all/GCA/023/229/265/GCA_023229265.1_ASM2322926v1
GCA_002498745.1	d__Archaea;p__Halobacteriota;c__Methanosarcinia;o__Methanotrichales;f__Methanotrichaceae;g__Methanothrix;s__Methanothrix sp011620785	Methanosaeta sp. UBA533	Archaea;Euryarchaeota;Stenosarchaea group	UBA533	SAMN06027058	PRJNA348753	Scaffold	2.00052	52.9		DAIO01	222	0	2017-10-10T00:00:00Z	ftp://ftp.ncbi.nlm.nih.gov/genomes/all/GCA/002/498/745/GCA_002498745.1_ASM249874v1
GCA_017994055.1	d__Archaea;p__Halobacteriota;c__Methanosarcinia;o__Methanotrichales;f__Methanotrichaceae;g__Methanothrix;s__Methanothrix sp017994055	Methanothrix sp.	Archaea;Euryarchaeota;Stenosarchaea group	Go_SlDig_bin_454	SAMN18120053	PRJNA524094	Scaffold	2.38253	53.1		JAGOLL01	126	2419	2021-04-15T00:00:00Z	ftp://ftp.ncbi.nlm.nih.gov/genomes/all/GCA/017/994/055/GCA_017994055.1_ASM1799405v1
GCA_018052825.1	d__Archaea;p__Halobacteriota;c__Methanosarcinia;o__Methanotrichales;f__Methanotrichaceae;g__Methanothrix;s__Methanothrix sp018052825	Methanothrix sp.	Archaea;Euryarchaeota;Stenosarchaea group	Gw_SlDig_bin_272	SAMN18120700	PRJNA524094	Scaffold	1.81513	56.1		JAGPMN01	77	1847	2021-04-17T00:00:00Z	ftp://ftp.ncbi.nlm.nih.gov/genomes/all/GCA/018/052/825/GCA_018052825.1_ASM1805282v1
GCA_023229165.1	d__Archaea;p__Halobacteriota;c__Methanosarcinia;o__Methanotrichales;f__Methanotrichaceae;g__Methanothrix;s__Methanothrix sp023229165	Methanothrix sp.	Archaea;Euryarchaeota;Stenosarchaea group	SO_2017_LW1 bin 8	SAMN27301863	PRJNA823399	Scaffold	2.72784	48.4		JALNZQ01	329	3110	2022-05-03T00:00:00Z	ftp://ftp.ncbi.nlm.nih.gov/genomes/all/GCA/023/229/165/GCA_023229165.1_ASM2322916v1
GCA_002506335.1	d__Archaea;p__Halobacteriota;c__Methanosarcinia;o__Methanotrichales;f__Methanotrichaceae;g__UBA114;s__UBA114 sp002506335	Methanosaeta sp. UBA114	Archaea;Euryarchaeota;Stenosarchaea group	UBA114	SAMN06027416	PRJNA348753	Scaffold	2.41223	51		DAXJ01	122	0	2017-10-10T00:00:00Z	ftp://ftp.ncbi.nlm.nih.gov/genomes/all/GCA/002/506/335/GCA_002506335.1_ASM250633v1
GCA_002501765.1	d__Archaea;p__Halobacteriota;c__Methanosarcinia;o__Methanotrichales;f__Methanotrichaceae;g__UBA204;s__UBA204 sp002501765	Methanosaeta sp. UBA204	Archaea;Euryarchaeota;Stenosarchaea group	UBA204	SAMN06027569	PRJNA348753	Scaffold	1.80847	54.5		DAOG01	157	0	2017-10-10T00:00:00Z	ftp://ftp.ncbi.nlm.nih.gov/genomes/all/GCA/002/501/765/GCA_002501765.1_ASM250176v1
GCA_004212135.1	d__Archaea;p__Halobacteriota;c__Syntropharchaeia;o__ANME-1;f__ANME-1;g__ANME-1-THS;s__ANME-1-THS sp004212135	Methanophagales archaeon ANME-1-THS	Archaea;Euryarchaeota;Stenosarchaea group	ANME-1-THS	SAMN10387997	PRJNA472146	Scaffold	2.03025	48.7		RXIE01	181	2106	2019-02-19T00:00:00Z	ftp://ftp.ncbi.nlm.nih.gov/genomes/all/GCA/004/212/135/GCA_004212135.1_ASM421213v1
GCA_020724985.1	d__Archaea;p__Halobacteriota;c__Syntropharchaeia;o__ANME-1;f__ANME-1;g__ANME-1-THS;s__ANME-1-THS sp020725315	Candidatus Methanoperedens sp.	Archaea;Euryarchaeota;Stenosarchaea group	BE2012_45_7	SAMN22209281	PRJNA767587	Scaffold	1.95674	44.8		DYFZ01	577	0	2021-11-02T00:00:00Z	ftp://ftp.ncbi.nlm.nih.gov/genomes/all/GCA/020/724/985/GCA_020724985.1_ASM2072498v1
GCA_002254785.1	d__Archaea;p__Halobacteriota;c__Syntropharchaeia;o__ANME-1;f__ANME-1;g__ANME1a;s__ANME1a sp003194425	ANME-1 cluster archaeon ex4572_4	Archaea;Euryarchaeota;Stenosarchaea group	ex4572_4	SAMN06647984	PRJNA362212	Scaffold	1.01808	53.2		NJEM01	95	1009	2017-08-16T00:00:00Z	ftp://ftp.ncbi.nlm.nih.gov/genomes/all/GCA/002/254/785/GCA_002254785.1_ASM225478v1
GCA_003194435.1	d__Archaea;p__Halobacteriota;c__Syntropharchaeia;o__ANME-1;f__ANME-1;g__G60ANME1;s__G60ANME1 sp003194435	Methanophagales archaeon	Archaea;Euryarchaeota;Stenosarchaea group	G60ANME1	SAMN08434988	PRJNA418316	Scaffold	1.80585	45.6		PQXC01	38	1801	2018-06-06T00:00:00Z	ftp://ftp.ncbi.nlm.nih.gov/genomes/all/GCA/003/194/435/GCA_003194435.1_ASM319443v1
GCA_012979255.1	d__Archaea;p__Halobacteriota;c__Syntropharchaeia;o__ANME-1;f__ANME-1;g__JACGMN01;s__	ANME-1 cluster archaeon GoMg4	Archaea;Euryarchaeota;Stenosarchaea group	GoMg4	SAMN08574218	PRJNA431796	Scaffold	1.3415	44		QBUO01	177	1495	2020-05-06T00:00:00Z	ftp://ftp.ncbi.nlm.nih.gov/genomes/all/GCA/012/979/255/GCA_012979255.1_ASM1297925v1
GCA_016649585.1	d__Archaea;p__Halobacteriota;c__Syntropharchaeia;o__ANME-1;f__ANME-1;g__JACGMN01;s__JACGMN01 sp016649585	Methanosarcinales archaeon	Archaea;Euryarchaeota;Stenosarchaea group	14_8_m_bin28	SAMN16871457	PRJNA680161	Scaffold	1.46039	44.7		JAENXH01	282	1712	2021-01-15T00:00:00Z	ftp://ftp.ncbi.nlm.nih.gov/genomes/all/GCA/016/649/585/GCA_016649585.1_ASM1664958v1
GCA_017883965.1	d__Archaea;p__Halobacteriota;c__Syntropharchaeia;o__ANME-1;f__ANME-1;g__JAFNKG01;s__JAFNKG01 sp017883965	Methanophagales archaeon	Archaea;Euryarchaeota;Stenosarchaea group	CR_Bin_179	SAMN18059653	PRJNA599172	Scaffold	2.47897	41.9		JAFNKG01	136	0	2021-04-08T00:00:00Z	ftp://ftp.ncbi.nlm.nih.gov/genomes/all/GCA/017/883/965/GCA_017883965.1_ASM1788396v1
GCA_023659095.1	d__Archaea;p__Halobacteriota;c__Syntropharchaeia;o__ANME-1;f__ANME-1;g__JAGXOR01;s__JAGXOR01 sp023659785	Methanomicrobia archaeon LH_S48	Archaea;Euryarchaeota;Stenosarchaea group	LH_S48	SAMN18613366	PRJNA699472	Scaffold	0.414975	42.2		JAGXQA01	152	0	2022-06-07T00:00:00Z	ftp://ftp.ncbi.nlm.nih.gov/genomes/all/GCA/023/659/095/GCA_023659095.1_ASM2365909v1
GCA_023659115.1	d__Archaea;p__Halobacteriota;c__Syntropharchaeia;o__ANME-1;f__ANME-1;g__JAGXOR01;s__JAGXOR01 sp023659785	Methanomicrobia archaeon LH_S47	Archaea;Euryarchaeota;Stenosarchaea group	LH_S47	SAMN18613365	PRJNA699472	Scaffold	0.710596	42.5		JAGXPZ01	183	0	2022-06-07T00:00:00Z	ftp://ftp.ncbi.nlm.nih.gov/genomes/all/GCA/023/659/115/GCA_023659115.1_ASM2365911v1
GCA_023659175.1	d__Archaea;p__Halobacteriota;c__Syntropharchaeia;o__ANME-1;f__ANME-1;g__JAGXOR01;s__JAGXOR01 sp023659785	Methanomicrobia archaeon LH_S43	Archaea;Euryarchaeota;Stenosarchaea group	LH_S43	SAMN18613361	PRJNA699472	Scaffold	0.637477	42.4		JAGXPV01	165	0	2022-06-07T00:00:00Z	ftp://ftp.ncbi.nlm.nih.gov/genomes/all/GCA/023/659/175/GCA_023659175.1_ASM2365917v1
GCA_023659195.1	d__Archaea;p__Halobacteriota;c__Syntropharchaeia;o__ANME-1;f__ANME-1;g__JAGXOR01;s__JAGXOR01 sp023659785	Methanomicrobia archaeon LH_S44	Archaea;Euryarchaeota;Stenosarchaea group	LH_S44	SAMN18613362	PRJNA699472	Scaffold	0.722585	42.6		JAGXPW01	211	0	2022-06-07T00:00:00Z	ftp://ftp.ncbi.nlm.nih.gov/genomes/all/GCA/023/659/195/GCA_023659195.1_ASM2365919v1
GCA_023659215.1	d__Archaea;p__Halobacteriota;c__Syntropharchaeia;o__ANME-1;f__ANME-1;g__JAGXOR01;s__JAGXOR01 sp023659785	Methanomicrobia archaeon LH_S42	Archaea;Euryarchaeota;Stenosarchaea group	LH_S42	SAMN18613360	PRJNA699472	Scaffold	0.36956	42.4		JAGXPU01	141	0	2022-06-07T00:00:00Z	ftp://ftp.ncbi.nlm.nih.gov/genomes/all/GCA/023/659/215/GCA_023659215.1_ASM2365921v1
GCA_023659235.1	d__Archaea;p__Halobacteriota;c__Syntropharchaeia;o__ANME-1;f__ANME-1;g__JAGXOR01;s__JAGXOR01 sp023659785	Methanomicrobia archaeon LH_S41	Archaea;Euryarchaeota;Stenosarchaea group	LH_S41	SAMN18613359	PRJNA699472	Scaffold	0.616436	42.7		JAGXPT01	221	0	2022-06-07T00:00:00Z	ftp://ftp.ncbi.nlm.nih.gov/genomes/all/GCA/023/659/235/GCA_023659235.1_ASM2365923v1
GCA_023659785.1	d__Archaea;p__Halobacteriota;c__Syntropharchaeia;o__ANME-1;f__ANME-1;g__JAGXOR01;s__JAGXOR01 sp023659785	Methanomicrobia archaeon LH_S13	Archaea;Euryarchaeota;Stenosarchaea group	LH_S13	SAMN18613331	PRJNA699472	Scaffold	1.53855	42.3		JAGXOR01	264	0	2022-06-07T00:00:00Z	ftp://ftp.ncbi.nlm.nih.gov/genomes/all/GCA/023/659/785/GCA_023659785.1_ASM2365978v1
GCA_023659815.1	d__Archaea;p__Halobacteriota;c__Syntropharchaeia;o__ANME-1;f__ANME-1;g__JAGXOR01;s__JAGXOR01 sp023659785	Methanomicrobia archaeon LH_S12	Archaea;Euryarchaeota;Stenosarchaea group	LH_S12	SAMN18613330	PRJNA699472	Scaffold	1.31693	42.4		JAGXOQ01	287	0	2022-06-07T00:00:00Z	ftp://ftp.ncbi.nlm.nih.gov/genomes/all/GCA/023/659/815/GCA_023659815.1_ASM2365981v1
GCA_023659835.1	d__Archaea;p__Halobacteriota;c__Syntropharchaeia;o__ANME-1;f__ANME-1;g__JAGXOR01;s__JAGXOR01 sp023659785	Methanomicrobia archaeon LH_S11	Archaea;Euryarchaeota;Stenosarchaea group	LH_S11	SAMN18613329	PRJNA699472	Scaffold	1.0195	42.3		JAGXOP01	232	0	2022-06-07T00:00:00Z	ftp://ftp.ncbi.nlm.nih.gov/genomes/all/GCA/023/659/835/GCA_023659835.1_ASM2365983v1
GCA_003336485.1	d__Archaea;p__Halobacteriota;c__Syntropharchaeia;o__ANME-1;f__ANME-1;g__QENH01;s__QENH01 sp003336485	Methanophagales archaeon	Archaea;Euryarchaeota;Stenosarchaea group	CONS3730B06UFb1	SAMN08574241	PRJNA431796	Scaffold	3.18251	42.9		QENH01	201	3510	2018-07-24T00:00:00Z	ftp://ftp.ncbi.nlm.nih.gov/genomes/all/GCA/003/336/485/GCA_003336485.1_ASM333648v1
GCA_009903435.1	d__Archaea;p__Halobacteriota;c__Syntropharchaeia;o__ANME-1;f__ANME-1;g__QENH01;s__QENH01 sp009903405	ANME-1 cluster archaeon AG-394-G21	Archaea;Euryarchaeota;Stenosarchaea group	AG-394-G21	SAMN08432500	PRJNA431796	Scaffold	1.86817	43		PRCY01	101	1831	2020-01-17T00:00:00Z	ftp://ftp.ncbi.nlm.nih.gov/genomes/all/GCA/009/903/435/GCA_009903435.1_ASM990343v1
GCA_013180565.1	d__Archaea;p__Halobacteriota;c__Syntropharchaeia;o__ANME-1;f__ANME-1;g__QENH01;s__QENH01 sp013180565	ANME-1 cluster archaeon GoMg3.2	Archaea;Euryarchaeota;Stenosarchaea group	GoMg3.2	SAMN08574217	PRJNA431796	Scaffold	2.72725	41.9		QBUN01	426	3213	2020-05-28T00:00:00Z	ftp://ftp.ncbi.nlm.nih.gov/genomes/all/GCA/013/180/565/GCA_013180565.1_ASM1318056v1
GCA_013374555.1	d__Archaea;p__Halobacteriota;c__Syntropharchaeia;o__ANME-1;f__ANME-1;g__QENJ01;s__	Methanophagales archaeon	Archaea;Euryarchaeota;Stenosarchaea group	CONS3730F07p2b1	SAMN08574224	PRJNA431796	Scaffold	2.75239	43.1		QENK01	380	3202	2020-06-26T00:00:00Z	ftp://ftp.ncbi.nlm.nih.gov/genomes/all/GCA/013/374/555/GCA_013374555.1_ASM1337455v1
GCA_013374565.1	d__Archaea;p__Halobacteriota;c__Syntropharchaeia;o__ANME-1;f__ANME-1;g__QENJ01;s__	Methanophagales archaeon	Archaea;Euryarchaeota;Stenosarchaea group	CONS3730MDAH03UFb1	SAMN08574223	PRJNA431796	Scaffold	3.40803	43.2		QENL01	503	3628	2020-06-26T00:00:00Z	ftp://ftp.ncbi.nlm.nih.gov/genomes/all/GCA/013/374/565/GCA_013374565.1_ASM1337456v1
GCA_013374425.1	d__Archaea;p__Halobacteriota;c__Syntropharchaeia;o__ANME-1;f__ANME-1;g__QENJ01;s__	Methanophagales archaeon	Archaea;Euryarchaeota;Stenosarchaea group	Agg-C03	SAMN08574226	PRJNA431796	Scaffold	1.89508	43.6		QBUP01	374	2055	2020-06-26T00:00:00Z	ftp://ftp.ncbi.nlm.nih.gov/genomes/all/GCA/013/374/425/GCA_013374425.1_ASM1337442v1
GCA_013180585.1	d__Archaea;p__Halobacteriota;c__Syntropharchaeia;o__ANME-1;f__ANME-1;g__QENJ01;s__QENJ01 sp013180585	ANME-1 cluster archaeon GoMg2	Archaea;Euryarchaeota;Stenosarchaea group	GoMg2	SAMN08574219	PRJNA431796	Scaffold	2.19292	42.6		QBUM01	251	2512	2020-05-28T00:00:00Z	ftp://ftp.ncbi.nlm.nih.gov/genomes/all/GCA/013/180/585/GCA_013180585.1_ASM1318058v1
GCA_013374505.1	d__Archaea;p__Halobacteriota;c__Syntropharchaeia;o__ANME-1;f__ANME-1;g__QENJ01;s__QENJ01 sp013374505	Methanophagales archaeon	Archaea;Euryarchaeota;Stenosarchaea group	CONS3730H04p2b1	SAMN08574227	PRJNA431796	Scaffold	2.57121	43.3		QENJ01	369	3030	2020-06-26T00:00:00Z	ftp://ftp.ncbi.nlm.nih.gov/genomes/all/GCA/013/374/505/GCA_013374505.1_ASM1337450v1
GCA_020793595.1	d__Archaea;p__Halobacteriota;c__Syntropharchaeia;o__ANME-1;f__ANME-1;g__QEXZ01;s__	Methanophagales archaeon	Archaea;Euryarchaeota;Stenosarchaea group	AAA252-L18	SAMN08574225	PRJNA431796	Scaffold	2.56085	42.3		DQIN01	698	2910	2021-11-08T00:00:00Z	ftp://ftp.ncbi.nlm.nih.gov/genomes/all/GCA/020/793/595/GCA_020793595.1_ASM2079359v1
GCA_003160755.1	d__Archaea;p__Halobacteriota;c__Syntropharchaeia;o__ANME-1;f__ANME-1;g__QEXZ01;s__QEXZ01 sp003160755	Methanomicrobiales archaeon	Archaea;Euryarchaeota;Stenosarchaea group	M5.MMPM	SAMN09045419	PRJNA454851	Scaffold	1.89892	43.3		QEXZ01	321	0	2018-05-25T00:00:00Z	ftp://ftp.ncbi.nlm.nih.gov/genomes/all/GCA/003/160/755/GCA_003160755.1_ASM316075v1
GCA_013180605.1	d__Archaea;p__Halobacteriota;c__Syntropharchaeia;o__ANME-1;f__ANME-1;g__QEXZ01;s__QEXZ01 sp013180605	ANME-1 cluster archaeon GoMg1	Archaea;Euryarchaeota;Stenosarchaea group	GoMg1	SAMN08574220	PRJNA431796	Scaffold	2.34429	42.6		QBUL01	189	2606	2020-05-28T00:00:00Z	ftp://ftp.ncbi.nlm.nih.gov/genomes/all/GCA/013/180/605/GCA_013180605.1_ASM1318060v1
GCA_014384645.1	d__Archaea;p__Halobacteriota;c__Syntropharchaeia;o__ANME-1;f__ANME-1;g__WJOV01;s__WJOV01 sp016782355	Methanomicrobia archaeon	Archaea;Euryarchaeota;Stenosarchaea group	NIOZ-UU102	SAMN15784174	PRJNA649215	Scaffold	1.48442	43		JACNFM01	321	1923	2020-09-01T00:00:00Z	ftp://ftp.ncbi.nlm.nih.gov/genomes/all/GCA/014/384/645/GCA_014384645.1_ASM1438464v1
GCA_001766815.1	d__Archaea;p__Halobacteriota;c__Syntropharchaeia;o__Syntropharchaeales;f__Syntropharchaeaceae;g__Syntropharchaeum_A;s__Syntropharchaeum_A caldarius	Candidatus Syntrophoarchaeum caldarius	Archaea;Euryarchaeota;Stenosarchaea group	BOX2	SAMN04880560	PRJNA319143	Scaffold	1.66608	45.4		LYOS01	10	1787	2016-10-18T00:00:00Z	ftp://ftp.ncbi.nlm.nih.gov/genomes/all/GCA/001/766/815/GCA_001766815.1_ASM176681v1
GCA_001766825.1	d__Archaea;p__Halobacteriota;c__Syntropharchaeia;o__Syntropharchaeales;f__Syntropharchaeaceae;g__Syntropharchaeum;s__Syntropharchaeum butanivorans	Candidatus Syntrophoarchaeum butanivorans	Archaea;Euryarchaeota;Stenosarchaea group	BOX1	SAMN04871411	PRJNA318983	Scaffold	1.45696	48.7		LYOR01	16	1604	2016-10-18T00:00:00Z	ftp://ftp.ncbi.nlm.nih.gov/genomes/all/GCA/001/766/825/GCA_001766825.1_ASM176682v1
GCA_021129915.1	d__Archaea;p__Halobacteriota;c__UBA148;o__UBA148;f__JAJOKI01;g__JAJOKI01;s__JAJOKI01 sp021129915	Methanocellales archaeon	Archaea;Euryarchaeota;Stenosarchaea group	MAG-838	SAMN23474159	PRJNA779602	Scaffold	0.730501	46.6		JAJOKI01	121	881	2021-12-08T00:00:00Z	ftp://ftp.ncbi.nlm.nih.gov/genomes/all/GCA/021/129/915/GCA_021129915.1_ASM2112991v1
GCA_002495885.1	d__Archaea;p__Halobacteriota;c__UBA148;o__UBA148;f__UBA148;g__UBA148;s__UBA148 sp002495885	Methanocellaceae archaeon UBA148	Archaea;Euryarchaeota;Stenosarchaea group	UBA148	SAMN06027039	PRJNA348753	Scaffold	1.6484	42.6		DAHG01	77	0	2017-10-10T00:00:00Z	ftp://ftp.ncbi.nlm.nih.gov/genomes/all/GCA/002/495/885/GCA_002495885.1_ASM249588v1
GCA_013331355.1	d__Archaea;p__Halobacteriota;c__UBA148;o__UBA148;f__UBA148;g__UBA148;s__UBA148 sp002495885	Methanocellales archaeon	Archaea;Euryarchaeota;Stenosarchaea group	UBA10530	SAMN13192963	PRJNA593905	Scaffold	0.925913	43.8		DUGN01	165	1023	2020-06-11T00:00:00Z	ftp://ftp.ncbi.nlm.nih.gov/genomes/all/GCA/013/331/355/GCA_013331355.1_ASM1333135v1
GCA_002841675.1	d__Archaea;p__Huberarchaeota;c__Huberarchaeia;o__Huberarchaeales;f__Huberarchaeaceae;g__Huberarchaeum;s__	Euryarchaeota archaeon HGW-Euryarchaeota-1	Archaea;Euryarchaeota;unclassified Euryarchaeota	HGW-Euryarchaeota-1	SAMN06767667	PRJNA321556	Scaffold	0.602417	34.4		PHAJ01	184	671	2017-12-13T00:00:00Z	ftp://ftp.ncbi.nlm.nih.gov/genomes/all/GCA/002/841/675/GCA_002841675.1_ASM284167v1
GCA_003229935.1	d__Archaea;p__Hydrothermarchaeota;c__Hydrothermarchaeia;o__Hydrothermarchaeales;f__BMS3B;g__BMS3B;s__BMS3B sp003229935	Euryarchaeota archaeon	Archaea;Euryarchaeota;unclassified Euryarchaeota	SZUA-158	SAMN09240142	PRJNA385762	Scaffold	1.74936	39		QIGD01	227	0	2018-06-15T00:00:00Z	ftp://ftp.ncbi.nlm.nih.gov/genomes/all/GCA/003/229/935/GCA_003229935.1_ASM322993v1
GCA_013152995.1	d__Archaea;p__Hydrothermarchaeota;c__Hydrothermarchaeia;o__Hydrothermarchaeales;f__BMS3B;g__JAADFH01;s__JAADFH01 sp013152995	Euryarchaeota archaeon	Archaea;Euryarchaeota;unclassified Euryarchaeota	M_MaxBin.010	SAMN12405718	PRJNA557557	Scaffold	0.827235	58.7		JAADFH01	143	1003	2020-05-22T00:00:00Z	ftp://ftp.ncbi.nlm.nih.gov/genomes/all/GCA/013/152/995/GCA_013152995.1_ASM1315299v1
GCA_013152685.1	d__Archaea;p__Hydrothermarchaeota;c__Hydrothermarchaeia;o__Hydrothermarchaeales;f__BMS3B;g__JAADFX01;s__JAADFX01 sp013152685	Euryarchaeota archaeon	Archaea;Euryarchaeota;unclassified Euryarchaeota	M_MaxBin.100	SAMN12405720	PRJNA557557	Scaffold	1.80081	59.9		JAADFX01	130	2086	2020-05-22T00:00:00Z	ftp://ftp.ncbi.nlm.nih.gov/genomes/all/GCA/013/152/685/GCA_013152685.1_ASM1315268v1
GCA_013152845.1	d__Archaea;p__Hydrothermarchaeota;c__Hydrothermarchaeia;o__Hydrothermarchaeales;f__JAADFM01;g__JAADFM01;s__JAADFM01 sp013152845	Euryarchaeota archaeon	Archaea;Euryarchaeota;unclassified Euryarchaeota	M_MaxBin.027	SAMN12405719	PRJNA557557	Scaffold	1.17296	59.7		JAADFM01	177	1483	2020-05-22T00:00:00Z	ftp://ftp.ncbi.nlm.nih.gov/genomes/all/GCA/013/152/845/GCA_013152845.1_ASM1315284v1
[truncated: 526 more rows]

## Sheet: DPANN
Assembly	GTDBTK Taxonomy	Organism Name	Organism Groups	Strain	BioSample	BioProject	Level	Size(Mb)	GC%	Replicons	WGS	Scaffolds	CDS	Release Date	GenBank FTP	RefSeq FTP
[truncated: 647 more rows]

[truncated: 4 more sheets: TACK, ASGARD, NCBI_Taxonomy, Database]
